# Supplementary material for: Mapping the landscape of cell type-dependent genetic regulation of DNA methylation across human tissues
Source: Research Square preprint supplement (doi:10.21203/rs.3.rs-7895550/v1), 2025-11-07
Supplement: Supplementary file 1 [file 011f9be72e1ec960483990bd.xlsx]

## Sheet: Supplementary Table 1
Supplementary Table 1. Participant and donor characteristics.
Study	HEALS	GTEx
Tissue types	Whole Blood (n=1,182)	Lung (n=190)	Colon (n=189)	Ovary (n=140)	Prostate (n=105)	Whole Blood (n=47)	Kidney (n=47)	Breast (n=36)
Age	38.7 (10.4)	55.2 (11.2)	55.7 (11.6)	50.0 (13.9)	53.1 (13.1)	50.0 (13.0)	59.4 (8.4)	49.86 (11.6)
BMI (kg/m2)	19.8 (3.4)	27.5 (3.9)	27.0 (4.0)	26.8 (4.2)	27.1 (3.8)	27.1 (4.1)	26.6 (3.7)	25.1 (3.8)
Sex
Male	580 (49.1%)	138 (72.6%)	130 (68.8%)	-	105 (100%)	38 (80.9%)	36 (76.6%)	0 (0%)
Female	602 (50.9%)	52 (27.4%)	59 (31.2%)	140 (100%)	-	9 (19.1%)	11 (23.4%)	36 (100%)
Racea
White	-	163 (85.8%)	167 (89.3%)	118 (84.3%)	96 (91.4%)	42 (89.4%)	41 (87.2%)	30 (83.3%)
Black	-	24 (12.6%)	19 (10.2%)	20 (14.3%)	8 (7.6%)	5 (10.6%)	6 (12.8%)	6 (16.7%)
Asian	1182 (100%)	3 (1.6%)	1 (0.5%)	2 (1.4%)	-	-	-	-
American Indian	-	-	-	-	1 (1.0%)	-	-	-
Not reported/unknown	-	-	-	-	-	-	-	-
Cigarette Smoking
Never	667 (56.4%)	56 (29.5%)	50 (26.5%)	53 (37.9%)	36 (34.3%)	11 (23.4%)	10 (21.3%)	11 (30.6%)
Ever	515 (43.6%)	133 (70.0%)	138 (73.0%)	85 (60.7%)	68 (64.8%)	36 (76.6%)	37 (78.7%)	25 (69.4%)
Not reported/unknown	-	1 (0.5%)	1 (0.5%)	2 (1.4%)	1 (1.0%)	-	-	-
Footnote:
HEALS, Health Effects of Arsenic Longitudinal Study; GTEx, Genotype-Tissue Expression Project
Metrics in table are displayed as follows (mean [SD] or n [%]).
a For GTEx donors, race was either reported by the donor, the donor’s family/next of kin, or abstracted from medical records. The listed classification categories were obtained from the NIH and refer to geographically based categories that humans share (i.e., common history, nationality, or geographic distribution).

## Sheet: Supplementary Table 2
Supplementary Table 2. Summary statistics for cell type-interaction mQTLs (imQTLs) identified at a Bonferroni-adjusted-p-value<0.05
Tissue	Cell Type	Variant ID	CpG ID	Marginal Effect		Main Effect		Interaction Effect
				β	p-value	β	p-value	β	p-value
Prostate	Basal epithelium	chr1:17094791:C:A	cg06746829	-1.15757	5.98281e-27	-1.08679	8.90621e-35	-0.481489	3.5155e-15
Prostate	Basal epithelium	chr3:14256616:T:A	cg25013568	1.12539	1.25869e-30	1.15647	2.82501e-43	0.461212	4.59357e-17
Prostate	Basal epithelium	chr7:120651:A:ACACTCAC	cg01156747	-1.35423	9.65061e-41	-1.32307	5.40011e-49	0.384146	2.76463e-12
Prostate	Basal epithelium	chr8:10532011:G:C	cg12617725	-0.542061	2.41818e-09	-0.556485	5.90708e-14	-0.52298	6.92511e-12
Prostate	Basal epithelium	chr8:139893309:G:A	cg05903540	1.12915	1.23996e-32	1.12895	1.40846e-45	0.410666	4.49815e-13
Prostate	Basal epithelium	chr11:26583693:C:A	cg04068676	1.03603	2.91237e-25	1.103	2.23626e-36	0.570004	9.69673e-15
Prostate	Basal epithelium	chr16:70792965:C:G	cg12192499	1.06261	1.03687e-20	1.02048	1.10445e-27	0.433026	8.97212e-11
Prostate	Basal epithelium	chr18:79832807:C:T	cg20099166	1.13642	7.29632e-39	1.10934	3.90305e-48	0.312614	5.15883e-14
Prostate	Luminal epithelium	chr8:139895393:A:G	cg05598481	0.782084	1.23142e-17	0.720309	9.28501e-21	0.542717	1.44709e-11
Prostate	Luminal epithelium	chr16:74598647:C:T	cg03628122	1.09366	7.5091e-22	1.16766	2.29842e-30	0.439394	5.49422e-11
Prostate	Luminal epithelium	chr20:4791024:A:G	cg13580267	1.2429	1.97994e-23	1.23087	1.25216e-30	0.510339	8.20724e-12
Prostate	Luminal epithelium	chr21:35727743:C:T	cg03771136	1.07856	1.81454e-35	1.1073	1.39398e-46	0.360488	8.916e-15
Prostate	Smooth muscle cell	chr8:139895393:A:G	cg05598481	0.782084	1.23142e-17	0.754318	2.06177e-24	-0.522938	3.26273e-12
Prostate	Smooth muscle cell	chr20:4791024:A:G	cg13580267	1.2429	1.97994e-23	1.23161	2.29118e-29	-0.528548	1.84748e-11
Prostate	Smooth muscle cell	chr21:35732069:C:T	cg03771136	1.07754	6.3044e-37	1.0809	7.43199e-45	-0.32492	4.92168e-11
Ovary	Endothelial cell	chr2:236117922:G:C	cg13658143	0.649869	2.89692e-13	0.618942	3.18018e-17	-0.528491	2.49138e-14
Ovary	Endothelial cell	chr7:105723775:T:C	cg00615188	-1.04277	7.75216e-37	-0.973182	9.6942e-41	0.394296	5.7984e-12
Ovary	Endothelial cell	chr9:129550379:G:C	cg06446673	0.668044	4.39502e-33	0.699913	1.41812e-41	-0.26175	1.0087e-11
Ovary	Endothelial cell	chr10:103619175:A:G	cg04492166	-0.978982	8.93982e-28	-0.924072	2.15911e-31	0.43272	1.73766e-11
Ovary	Endothelial cell	chr11:1668095:G:A	cg13670288	0.030737	0.703092	0.0329299	0.624637	0.485187	1.31655e-11
Ovary	Immune cells	chr7:99981409:A:G	cg05697754	0.122652	0.279366	0.115902	0.226954	0.667436	1.42297e-10
Ovary	Immune cells	chr12:117472900:C:T	cg16279999	-0.166591	0.0412959	-0.0703881	0.308844	-0.499009	3.67142e-11
Ovary	Immune cells	chr17:3530249:A:G	cg24935810	0.925076	7.2681e-29	0.840753	2.54923e-30	-0.331923	1.67017e-11
Lung	Endothelial cell	chr1:201628819:T:C	cg21480333	0.958823	1.54254e-40	0.959597	6.97233e-51	0.44619	4.27841e-17
Lung	Endothelial cell	chr3:112000483:C:T	cg03724874	0.935656	3.04319e-51	0.987957	1.14278e-62	0.313655	3.82839e-14
Lung	Endothelial cell	chr3:158603134:T:C	cg16449649	1.18833	7.15573e-66	1.18567	9.90754e-73	0.260865	5.60136e-11
Lung	Endothelial cell	chr6:110873500:C:G	cg01879420	-1.36488	5.12874e-68	-1.42942	3.21836e-77	0.309108	5.22182e-11
Lung	Endothelial cell	chr8:21945399:A:T	cg02889774	0.348868	1.76689e-08	0.36041	6.35672e-11	0.430921	1.67849e-11
Lung	Endothelial cell	chr8:27607412:A:G	cg04676645	-1.0698	1.27807e-56	-1.10137	4.23794e-65	-0.280249	2.67098e-11
Lung	Endothelial cell	chr8:95199841:A:G	cg14639642	0.960256	1.33217e-41	0.946789	1.98632e-47	0.307755	2.35544e-11
Lung	Endothelial cell	chr10:15206453:A:G	cg04371749	0.946028	1.16833e-46	0.931005	3.66593e-54	0.323394	1.3489e-13
Lung	Endothelial cell	chr13:112642030:T:C	cg00557959	1.22093	5.3184e-74	1.25217	8.40298e-83	0.243452	2.90028e-11
Lung	Endothelial cell	chr13:112642030:T:C	cg15756319	1.23354	2.06585e-72	1.2676	4.66841e-82	0.263747	2.85285e-12
Lung	Endothelial cell	chr15:41554978:T:G	cg03177551	-1.07145	8.0406e-43	-1.07307	2.74361e-49	-0.361402	8.1278e-12
Lung	Endothelial cell	chr16:84714360:G:T	cg26562921	0.683113	1.44628e-29	0.704277	9.21426e-39	0.312137	1.10653e-15
Lung	Endothelial cell	chr16:89608660:T:G	cg09113939	0.765646	2.20661e-39	0.753586	5.77888e-46	0.31062	6.85005e-13
Lung	Endothelial cell	chr17:81459390:A:G	cg06671298	1.112	1.86153e-61	1.12871	7.9686e-70	0.285776	1.23513e-11
Lung	Endothelial cell	chr17:81459390:A:G	cg21841085	0.972588	1.51219e-46	0.993493	1.02954e-54	0.331955	6.04524e-12
Lung	Endothelial cell	chr19:18591687:T:C	cg15007983	0.393682	1.48199e-06	0.393301	4.07063e-08	-0.526116	4.3743e-12
Lung	Endothelial cell	chr19:35309759:G:T	cg01349478	-1.00599	1.86211e-31	-1.08389	2.74963e-40	-0.423437	1.98132e-12
Lung	Epithelial cell	chr1:1229369:G:GC	cg05329510	0.649972	1.1688e-17	0.633272	3.73896e-20	0.43478	5.10525e-11
Lung	Epithelial cell	chr1:9272201:T:C	cg12763828	-0.221087	0.00233098	-0.219726	0.000667803	-0.362271	2.76684e-11
Lung	Epithelial cell	chr1:9158662:T:G	cg05907464	-0.492468	1.132e-07	-0.464622	1.52972e-10	0.700015	2.15272e-21
Lung	Epithelial cell	chr1:147030175:A:G	cg02487331	1.03831	2.84879e-40	1.07396	7.78332e-49	-0.399797	2.77379e-12
Lung	Epithelial cell	chr1:154744782:T:C	cg13983884	1.25849	4.15865e-55	1.27517	2.32006e-66	-0.360448	1.55632e-16
Lung	Epithelial cell	chr1:245441928:C:T	cg16178225	1.13242	1.19313e-45	1.12799	2.40182e-56	-0.379337	4.61894e-15
Lung	Epithelial cell	chr2:36468477:A:G	cg04259027	-1.0413	5.07041e-46	-1.04617	4.50631e-53	0.309386	1.04779e-11
Lung	Epithelial cell	chr2:42060166:G:A	cg19522960	1.31038	2.89323e-79	1.29395	4.64064e-87	-0.255686	6.24291e-12
Lung	Epithelial cell	chr2:113164835:A:G	cg13088038	1.10323	1.77481e-46	1.08913	3.10923e-55	0.333174	9.93319e-14
Lung	Epithelial cell	chr2:127128582:C:T	cg14317533	-0.770777	9.05117e-23	-0.738583	2.83763e-26	0.458784	1.60585e-12
Lung	Epithelial cell	chr3:127618091:A:G	cg17764313	1.20774	8.16561e-39	1.27797	5.11107e-48	-0.541541	1.98552e-12
Lung	Epithelial cell	chr3:134926355:G:A	cg07068406	-1.21179	5.42773e-68	-1.22162	7.75924e-77	0.2984	1.22993e-12
Lung	Epithelial cell	chr4:3297777:T:C	cg05104523	0.927366	4.2392e-43	0.961227	7.18474e-52	0.304317	6.01253e-12
Lung	Epithelial cell	chr6:14739104:C:G	cg17279147	-0.918735	1.35188e-32	-0.923664	7.23945e-38	0.391662	6.89569e-11
Lung	Epithelial cell	chr6:31123081:G:A	cg26888012	1.09348	1.97784e-63	1.11467	4.17652e-72	0.261874	7.32744e-12
Lung	Epithelial cell	chr7:30764200:G:C	cg11956498	-1.13708	6.72804e-67	-1.15791	2.39399e-82	-0.328695	1.31474e-19
Lung	Epithelial cell	chr8:9249128:G:A	cg25960393	1.38243	2.67669e-53	1.33645	2.09287e-60	-0.404119	3.6974e-13
Lung	Epithelial cell	chr8:9249128:G:A	cg11070274	1.46006	6.91708e-56	1.41147	1.46953e-63	-0.389621	1.92807e-12
Lung	Epithelial cell	chr8:100165529:C:A	cg00191853	1.0175	9.8261e-51	1.0288	2.97702e-58	-0.297628	1.67775e-11
Lung	Epithelial cell	chr9:36154681:A:C	cg19097407	1.21283	8.67748e-60	1.26136	2.75774e-70	-0.306003	1.45497e-13
Lung	Epithelial cell	chr9:108785116:C:T	cg13837146	1.24664	5.37897e-38	1.29673	4.44705e-46	-0.452798	1.32323e-11
Lung	Epithelial cell	chr9:136533458:C:T	cg13861904	0.986732	8.46228e-43	0.993671	5.85467e-50	0.319523	5.76372e-12
Lung	Epithelial cell	chr10:3125914:G:A	cg24984350	-1.21636	7.77073e-60	-1.23542	5.43013e-68	-0.312928	1.03781e-11
Lung	Epithelial cell	chr10:33010319:C:T	cg00146027	-0.229712	0.0124896	-0.249076	0.00143926	0.669419	2.80819e-14
Lung	Epithelial cell	chr10:103883045:A:C	cg01727419	0.180801	0.0483332	0.139089	0.0839025	0.600235	1.75718e-11
Lung	Epithelial cell	chr10:110433979:C:G	cg08771084	0.938633	1.18543e-46	0.947117	2.37155e-54	0.308561	4.46094e-12
Lung	Epithelial cell	chr10:113071675:A:T	cg08687829	1.00727	1.08075e-57	1.02415	9.11392e-71	0.286374	3.41476e-17
Lung	Epithelial cell	chr10:122102021:A:C	cg19174603	1.12823	8.67773e-60	1.13387	2.64272e-67	0.26573	2.60371e-11
Lung	Epithelial cell	chr11:492617:G:A	cg01052776	1.3016	1.5608e-40	1.35193	6.19535e-49	0.381982	1.7899e-12
Lung	Epithelial cell	chr11:76657509:A:G	cg16098618	1.13852	5.77877e-59	1.13577	1.88819e-66	-0.275778	4.26875e-11
Lung	Epithelial cell	chr11:76769211:C:T	cg02610851	-1.16238	3.26079e-68	-1.18784	2.92073e-81	-0.316014	2.39503e-16
Lung	Epithelial cell	chr11:112182006:GA:G	cg05887493	0.791458	1.78186e-20	0.836643	6.0453e-28	0.405709	1.40807e-11
Lung	Epithelial cell	chr12:664290:C:T	cg05534515	-0.908471	1.49921e-32	-0.932137	4.71631e-39	-0.367823	3.34785e-11
Lung	Epithelial cell	chr15:67058143:C:T	cg20356637	-1.41128	1.4422e-51	-1.32416	1.74643e-54	0.396875	1.05868e-11
Lung	Epithelial cell	chr17:5379468:C:T	cg01592554	1.21284	1.29741e-69	1.20384	4.65366e-77	0.26004	6.26969e-12
Lung	Epithelial cell	chr17:46208586:T:C	cg01906119	-0.742959	8.33534e-21	-0.679181	5.11964e-22	-0.383633	1.42447e-11
Lung	Epithelial cell	chr19:7224420:G:A	cg09779027	-0.890324	1.16788e-55	-0.887479	2.13969e-64	-0.269737	2.24741e-14
Lung	Epithelial cell	chr19:35309759:G:T	cg22238209	1.39988	2.86429e-67	1.34714	5.55829e-75	-0.317724	2.23071e-15
Lung	Epithelial cell	chr20:45279657:T:C	cg22669717	-0.63424	2.46745e-10	-0.674954	1.02565e-14	0.621527	7.43329e-15
Lung	Epithelial cell	chr20:50643247:A:G	cg09720768	1.11534	1.06669e-44	1.11936	2.69381e-51	0.340075	4.16353e-11
Lung	Epithelial cell	chr21:36978234:G:A	cg21871091	-0.572939	1.90729e-22	-0.55588	4.86002e-27	0.351103	6.64302e-13
Lung	Granulocyte	chr1:8422018:C:T	cg16484858	-1.21086	1.60532e-64	-1.24304	2.57115e-73	-0.271643	7.38668e-12
Lung	Granulocyte	chr1:8422018:C:T	cg14004768	-1.22486	2.23504e-66	-1.25526	9.44541e-75	-0.261443	2.04096e-11
Lung	Granulocyte	chr1:9271433:G:A	cg12763828	-0.311795	9.40668e-05	-0.198964	0.00428806	0.436958	1.09309e-12
Lung	Granulocyte	chr1:9158662:T:G	cg05907464	-0.492468	1.132e-07	-0.476567	4.79464e-10	-0.631763	1.66098e-16
Lung	Granulocyte	chr1:38569036:C:T	cg21314629	0.0920241	0.439447	0.234294	0.0273969	-0.630894	7.21878e-12
Lung	Granulocyte	chr1:115269758:A:G	cg23384882	-1.1547	5.16204e-60	-1.14498	7.30364e-67	-0.279807	3.0842e-11
Lung	Granulocyte	chr1:115269758:A:G	cg23177161	-1.17089	1.58275e-59	-1.16082	2.49253e-66	-0.286263	3.06587e-11
Lung	Granulocyte	chr1:147030175:A:G	cg02487331	1.03831	2.84879e-40	1.04883	5.07327e-48	0.418761	1.13754e-12
Lung	Granulocyte	chr1:154744782:T:C	cg13983884	1.25849	4.15865e-55	1.26295	1.52483e-67	0.379555	8.04458e-18
Lung	Granulocyte	chr1:156936658:A:G	cg12604331	1.09188	1.61587e-35	1.10998	1.609e-42	0.433503	2.365e-12
Lung	Granulocyte	chr1:245441928:C:T	cg16178225	1.13242	1.19313e-45	1.12692	7.36993e-54	0.354062	6.72547e-13
Lung	Granulocyte	chr2:36468477:A:G	cg04259027	-1.0413	5.07041e-46	-1.05097	2.54068e-55	-0.333914	7.35142e-14
Lung	Granulocyte	chr2:42060166:G:A	cg19522960	1.31038	2.89323e-79	1.3008	2.73651e-87	0.257723	3.31314e-12
Lung	Granulocyte	chr2:127128582:C:T	cg14317533	-0.770777	9.05117e-23	-0.749713	6.34672e-28	-0.503584	6.51536e-15
Lung	Granulocyte	chr2:230916568:A:G	cg26072390	0.413369	0.00105553	0.452383	5.60728e-05	0.767754	1.02304e-11
Lung	Granulocyte	chr3:134926355:G:A	cg07068406	-1.21179	5.42773e-68	-1.23649	3.38032e-79	-0.283234	2.21153e-13
Lung	Granulocyte	chr4:166817044:G:A	cg20296596	1.04963	4.86147e-67	1.06541	1.76019e-76	-0.217197	7.8254e-12
Lung	Granulocyte	chr5:96173996:A:C	cg06277666	-0.0834301	0.119947	-0.112901	0.0173059	0.305424	1.55081e-11
Lung	Granulocyte	chr6:14738735:T:C	cg17279147	-0.918735	1.35188e-32	-0.908011	2.08659e-37	-0.397392	4.25822e-11
Lung	Granulocyte	chr6:56230363:A:G	cg02484732	-1.20184	2.37114e-76	-1.19455	1.65399e-82	-0.208782	2.93057e-11
Lung	Granulocyte	chr7:30764200:G:C	cg11956498	-1.13708	6.72804e-67	-1.15685	8.19167e-76	0.278378	5.62264e-12
Lung	Granulocyte	chr8:9249128:G:A	cg25960393	1.38243	2.67669e-53	1.35491	1.80188e-60	0.338808	4.23882e-13
Lung	Granulocyte	chr8:9249128:G:A	cg11070274	1.46006	6.91708e-56	1.43236	2.49234e-63	0.343931	2.8483e-13
Lung	Granulocyte	chr8:100165529:C:A	cg00191853	1.0175	9.8261e-51	1.02402	9.75446e-58	0.295435	1.01582e-11
Lung	Granulocyte	chr8:101649967:G:C	cg20585841	-0.978527	5.76701e-23	-1.01361	6.49823e-29	-0.448614	2.91571e-11
Lung	Granulocyte	chr9:96117875:C:T	cg03249723	1.23321	3.58815e-73	1.19161	3.48172e-79	0.269286	5.1554e-13
Lung	Granulocyte	chr9:108785302:C:T	cg13837146	1.24664	5.37897e-38	1.27283	3.88711e-45	0.405743	4.01766e-11
Lung	Granulocyte	chr10:33010319:C:T	cg00146027	-0.229712	0.0124896	-0.192673	0.0118604	-0.634997	2.92412e-15
Lung	Granulocyte	chr10:113071675:A:T	cg08687829	1.00727	1.08075e-57	1.01372	1.63137e-66	-0.235986	1.44702e-13
Lung	Granulocyte	chr11:512973:T:G	cg01052776	1.2987	1.30611e-39	1.36712	2.29624e-49	-0.389065	3.46399e-13
Lung	Granulocyte	chr11:76657509:A:G	cg16098618	1.13852	5.77877e-59	1.12762	2.46136e-70	0.332599	5.18104e-17
Lung	Granulocyte	chr15:67058606:A:C	cg20356637	-1.41128	1.4422e-51	-1.33005	4.2116e-55	-0.403709	2.19359e-12
Lung	Granulocyte	chr15:77546077:T:C	cg01984146	-1.10429	5.98664e-52	-1.14423	2.54823e-62	-0.358909	1.88475e-13
Lung	Granulocyte	chr17:5379466:C:T	cg01592554	1.21284	1.29741e-69	1.21446	1.75107e-77	-0.247773	2.40572e-11
Lung	Granulocyte	chr19:7224420:G:A	cg09779027	-0.890324	1.16788e-55	-0.894754	4.11362e-63	0.239136	1.80004e-11
Lung	Granulocyte	chr19:35309759:G:T	cg22238209	1.39988	2.86429e-67	1.34826	2.48031e-76	0.312137	1.24926e-16
Lung	Granulocyte	chr20:45280229:T:C	cg22669717	-0.593807	8.88952e-10	-0.625109	9.84334e-13	-0.520308	1.00082e-10
Lung	Lymphocyte	chr3:132981065:G:A	cg06635529	0.458814	1.99662e-08	0.238767	0.000100508	-0.550796	5.92801e-23
Lung	Lymphocyte	chr3:132981065:G:A	cg03287359	0.546777	5.40203e-10	0.315872	1.65072e-06	-0.551309	3.80346e-21
Lung	Macrophage	chr1:31203325:CAGAAGGGGTCACAGTCA:C	cg18621232	-0.783982	2.54756e-29	-0.793697	2.86481e-36	-0.363405	2.65145e-13
Lung	Macrophage	chr1:37879221:G:A	cg14087524	-1.11999	3.65115e-48	-1.13067	3.1583e-57	-0.357806	1.11649e-13
Lung	Macrophage	chr1:115271679:TA:T	cg23177161	-1.23761	6.46477e-67	-1.20259	1.02743e-72	-0.268038	7.22424e-12
Lung	Macrophage	chr1:154744675:A:G	cg13983884	1.25949	7.7453e-57	1.27611	1.09461e-68	0.326912	1.06171e-15
Lung	Macrophage	chr1:156936658:A:G	cg12604331	1.09188	1.61587e-35	1.05242	2.39915e-41	0.427134	1.38084e-12
Lung	Macrophage	chr1:160063712:C:T	cg11789449	1.14963	1.65769e-56	1.16886	4.80679e-68	0.380253	1.56412e-15
Lung	Macrophage	chr1:203082762:C:G	cg04395153	-1.15118	5.8661e-52	-1.13738	1.91257e-60	-0.328041	4.06174e-14
Lung	Macrophage	chr2:36468477:A:G	cg04259027	-1.0413	5.07041e-46	-1.04294	7.50064e-57	-0.338979	4.10652e-15
Lung	Macrophage	chr2:112085346:T:A	cg18349077	1.20603	1.30734e-70	1.19684	6.56188e-77	0.24891	7.07171e-11
Lung	Macrophage	chr2:112085346:T:A	cg26844603	1.19955	4.11237e-69	1.19048	4.98816e-77	0.272874	1.18625e-12
Lung	Macrophage	chr2:127128582:C:T	cg14317533	-0.770777	9.05117e-23	-0.790947	3.56475e-34	-0.559543	3.64919e-22
Lung	Macrophage	chr2:128748167:T:G	cg06888826	-1.27576	1.11022e-65	-1.23306	2.09676e-71	-0.271854	1.38028e-11
Lung	Macrophage	chr3:133857880:C:G	cg08071363	1.2994	7.69318e-80	1.29828	2.87447e-89	0.265905	1.04685e-13
Lung	Macrophage	chr3:134926504:G:A	cg07068406	-1.21179	5.42773e-68	-1.25802	7.06056e-79	-0.288561	8.73563e-14
Lung	Macrophage	chr3:196187886:C:T	cg26673516	0.178427	0.00825446	0.146017	0.0115779	0.378864	1.3047e-12
Lung	Macrophage	chr5:176821727:C:T	cg11813441	-0.098443	0.510241	-0.0156022	0.905277	-0.641738	1.43277e-11
Lung	Macrophage	chr6:41227682:T:G	cg25555787	1.37002	2.86502e-43	1.45412	2.1858e-52	0.465061	4.91869e-11
Lung	Macrophage	chr6:56230363:A:G	cg02484732	-1.20184	2.37114e-76	-1.15119	1.48158e-83	-0.274397	1.46017e-14
Lung	Macrophage	chr7:25926270:T:A	cg18496131	-1.00613	4.08066e-59	-1.018	4.58614e-67	-0.257545	2.05773e-11
Lung	Macrophage	chr7:135171547:C:A	cg07876788	1.17327	3.9758e-78	1.18574	5.2298e-90	0.227164	2.88538e-15
Lung	Macrophage	chr8:23323039:C:G	cg12060669	-1.34796	1.23608e-53	-1.34704	5.01963e-62	-0.418323	4.25409e-13
Lung	Macrophage	chr8:100165529:C:A	cg00191853	1.0175	9.8261e-51	1.03282	1.6048e-59	0.28571	3.9777e-12
Lung	Macrophage	chr8:143617254:G:C	cg00600477	-1.13724	1.85309e-53	-1.21261	4.18756e-64	-0.338449	3.35125e-13
Lung	Macrophage	chr9:80645600:A:G	cg10841563	1.10646	1.12543e-49	1.07368	1.40726e-54	0.332237	1.05552e-11
Lung	Macrophage	chr9:96117875:C:T	cg03249723	1.23321	3.58815e-73	1.22287	8.28403e-84	0.292739	7.93271e-15
Lung	Macrophage	chr9:108785116:C:T	cg13837146	1.24664	5.37897e-38	1.17692	6.05273e-45	0.47101	6.49478e-18
Lung	Macrophage	chr9:112199396:C:T	cg04230060	1.09715	1.15156e-29	1.1625	4.10175e-38	0.467325	8.95936e-13
Lung	Macrophage	chr10:78992576:G:A	cg05119883	1.08903	3.91578e-68	1.08709	5.94089e-75	0.238934	2.44099e-11
Lung	Macrophage	chr10:106992295:G:T	cg24795173	1.24684	1.83171e-70	1.19181	4.6443e-76	0.239641	1.07253e-12
Lung	Macrophage	chr10:127906089:A:G	cg25460273	1.17458	3.26428e-68	1.19956	9.92717e-82	0.299089	4.92182e-18
Lung	Macrophage	chr10:132235389:G:A	cg19754622	-1.20322	3.582e-62	-1.19212	9.59017e-70	-0.301653	1.40504e-12
Lung	Macrophage	chr11:76657509:A:G	cg16098618	1.13852	5.77877e-59	1.13774	2.36623e-74	0.364657	4.70431e-21
Lung	Macrophage	chr11:76657509:A:G	cg17970043	1.15304	2.95496e-63	1.15388	1.31461e-70	0.255762	4.25766e-11
Lung	Macrophage	chr12:7747588:C:T	cg07195891	-1.18107	2.30457e-59	-1.18992	2.34686e-67	-0.327372	8.68325e-12
Lung	Macrophage	chr12:121976197:C:T	cg24540763	1.16231	2.4179e-53	1.19245	2.9918e-62	0.359558	3.38513e-12
Lung	Macrophage	chr13:100589974:G:A	cg17474649	-0.796736	3.32998e-40	-0.768774	3.33163e-46	-0.320049	2.81384e-13
Lung	Macrophage	chr13:106680897:C:T	cg20124410	-1.1032	2.28995e-40	-1.04345	6.12764e-43	-0.368603	5.56099e-11
Lung	Macrophage	chr14:76909348:C:A	cg13246055	1.44143	1.66303e-58	1.43381	3.77895e-66	0.450014	2.51041e-12
Lung	Macrophage	chr14:93953764:T:C	cg00831276	0.0731047	0.420621	-0.0252646	0.751865	0.531668	5.75345e-12
Lung	Macrophage	chr15:77547787:A:G	cg01984146	-1.1034	1.03486e-48	-1.15605	3.67029e-58	-0.373082	8.31682e-13
Lung	Macrophage	chr16:3669343:C:T	cg04681450	-1.16664	2.72244e-58	-1.16459	1.6587e-65	-0.288413	6.70268e-11
Lung	Macrophage	chr16:28264921:G:A	cg02218090	-1.13953	3.49311e-61	-1.1634	1.78321e-69	-0.263552	4.18352e-11
Lung	Macrophage	chr18:74995357:G:GT	cg24884166	0.734997	7.34171e-20	0.802192	2.3908e-26	0.441464	2.98471e-11
Lung	Macrophage	chr19:35309759:G:T	cg22238209	1.39988	2.86429e-67	1.38564	5.00508e-74	0.243414	4.18299e-11
Lung	Macrophage	chr20:15141367:T:C	cg07104639	-1.15653	1.37429e-68	-1.11124	2.35902e-75	-0.280435	3.65357e-14
Lung	Macrophage	chr20:45053310:C:T	cg06612594	-1.12611	2.16666e-49	-1.10024	6.43329e-55	-0.340395	1.15588e-11
Lung	Macrophage	chr20:48927097:A:C	cg19255693	1.2458	3.23247e-57	1.2363	2.14793e-65	0.33576	3.25181e-12
Lung	Macrophage	chr21:42593782:G:A	cg00121528	-1.45386	1.34516e-50	-1.52112	3.06365e-60	0.430614	9.34892e-12
Lung	Monocyte	chr1:9158662:T:G	cg05907464	-0.492468	1.132e-07	-0.395135	1.87947e-07	-0.693901	1.00073e-16
Lung	Monocyte	chr1:31208167:T:C	cg18621232	-0.768727	2.47635e-28	-0.744061	1.49195e-32	-0.417877	2.46637e-12
Lung	Monocyte	chr1:37786964:G:A	cg14087524	1.09386	1.32277e-53	1.09758	2.22992e-61	0.328546	8.65829e-12
Lung	Monocyte	chr1:100538206:C:A	cg07412545	1.13042	1.70444e-58	1.1661	1.16261e-70	0.367923	3.68085e-15
Lung	Monocyte	chr1:147030175:A:G	cg02487331	1.03831	2.84879e-40	1.01256	2.38783e-45	0.452581	5.37854e-12
Lung	Monocyte	chr1:154745804:T:C	cg13983884	1.25949	7.7453e-57	1.25026	7.39122e-70	0.375402	1.20724e-18
Lung	Monocyte	chr1:156936658:A:G	cg12604331	1.09188	1.61587e-35	1.05027	1.1219e-39	0.501256	5.49195e-12
Lung	Monocyte	chr1:203082762:C:G	cg04395153	-1.15118	5.8661e-52	-1.15712	3.00992e-58	-0.372111	6.08339e-12
Lung	Monocyte	chr2:24719452:AT:A	cg14849556	0.972099	4.44016e-40	1.04391	1.58761e-48	-0.359728	2.56635e-11
Lung	Monocyte	chr2:36468477:A:G	cg04259027	-1.0413	5.07041e-46	-1.06576	2.20927e-54	-0.334383	2.45481e-12
Lung	Monocyte	chr2:127128582:C:T	cg14317533	-0.770777	9.05117e-23	-0.707323	1.1762e-27	-0.564068	1.6945e-18
Lung	Monocyte	chr2:128744356:T:C	cg06888826	-1.2729	2.58469e-64	-1.2115	6.80801e-67	-0.281636	2.17708e-11
Lung	Monocyte	chr3:121995837:G:A	cg20356878	1.20601	2.20714e-58	1.21132	4.54351e-66	0.390786	9.68781e-12
Lung	Monocyte	chr3:134926559:C:T	cg07068406	-1.19511	1.05554e-62	-1.21416	8.06818e-71	-0.320984	5.17158e-11
Lung	Monocyte	chr4:166817044:G:A	cg20296596	1.04963	4.86147e-67	1.07676	8.50737e-76	-0.243266	1.13109e-11
Lung	Monocyte	chr6:14739104:C:G	cg17279147	-0.918735	1.35188e-32	-0.929329	3.31012e-39	-0.486624	3.01048e-12
Lung	Monocyte	chr6:56229290:A:G	cg02484732	-1.18029	5.11266e-67	-1.134	1.97327e-74	-0.305229	5.36294e-14
Lung	Monocyte	chr8:9249128:G:A	cg25960393	1.38243	2.67669e-53	1.35086	7.018e-61	0.400199	5.18745e-13
Lung	Monocyte	chr8:23323211:A:G	cg12060669	-1.40243	7.56452e-62	-1.37327	1.81548e-69	-0.380644	2.61492e-13
Lung	Monocyte	chr8:100905493:T:C	cg07217150	-1.08019	6.22215e-36	-1.06972	1.60608e-41	-0.474988	6.58944e-12
Lung	Monocyte	chr9:96117875:C:T	cg03249723	1.23321	3.58815e-73	1.21252	1.87062e-87	0.346179	2.12526e-20
Lung	Monocyte	chr9:124125807:C:T	cg21177396	-1.20764	1.97527e-73	-1.17849	1.14211e-78	-0.253459	6.53845e-11
Lung	Monocyte	chr10:127906089:A:G	cg25460273	1.17458	3.26428e-68	1.17536	6.48235e-77	0.301036	1.27179e-12
Lung	Monocyte	chr11:502371:G:A	cg01052776	1.29836	2.38093e-40	1.41548	3.01099e-51	-0.458723	2.79053e-13
Lung	Monocyte	chr11:76657509:A:G	cg16098618	1.13852	5.77877e-59	1.10035	4.19991e-70	0.361555	2.08305e-19
Lung	Monocyte	chr11:76657509:A:G	cg17970043	1.15304	2.95496e-63	1.12459	1.06135e-68	0.270565	9.15351e-12
Lung	Monocyte	chr12:96223526:C:T	cg00418190	-1.24553	3.64072e-52	-1.19279	1.73588e-56	-0.387568	4.01539e-12
Lung	Monocyte	chr14:76909392:T:C	cg13246055	1.44143	1.66303e-58	1.44985	2.92199e-67	0.395216	9.77032e-13
Lung	Monocyte	chr14:100603617:T:A	cg10829391	1.21583	2.5384e-48	1.2164	6.84443e-55	0.413341	3.15386e-11
Lung	Monocyte	chr15:42365364:C:T	cg18814616	1.38542	3.44008e-58	1.41761	1.25462e-67	-0.376416	9.94565e-13
Lung	Monocyte	chr15:77546077:T:C	cg01984146	-1.10429	5.98664e-52	-1.12929	7.48033e-61	-0.3969	1.8466e-12
Lung	Monocyte	chr16:67998295:GC:G	cg02184558	1.3733	3.83588e-48	1.38626	9.39323e-55	0.518167	1.58567e-10
Lung	Monocyte	chr19:35309759:G:T	cg01349478	-1.00599	1.86211e-31	-1.07781	1.6951e-39	0.419328	1.89648e-11
Lung	Monocyte	chr19:35309759:G:T	cg22238209	1.39988	2.86429e-67	1.34939	4.29135e-72	0.29506	8.73727e-12
Lung	Monocyte	chr20:15151187:G:A	cg07104639	-1.13558	4.61442e-64	-1.11077	1.14919e-70	-0.294474	1.36533e-12
Lung	Stromal cell	chr1:8422018:C:T	cg16484858	-1.21086	1.60532e-64	-1.21241	2.50666e-72	0.328923	4.63241e-12
Lung	Stromal cell	chr1:8429242:C:T	cg14004768	-1.21936	6.63439e-63	-1.22306	2.8723e-70	0.328773	1.357e-11
Lung	Stromal cell	chr1:100538206:C:A	cg07412545	1.13042	1.70444e-58	1.14248	9.11821e-66	-0.323006	4.89349e-11
Lung	Stromal cell	chr1:115269758:A:G	cg23384882	-1.1547	5.16204e-60	-1.13984	2.14055e-67	0.302176	1.09742e-12
Lung	Stromal cell	chr1:115269758:A:G	cg23177161	-1.17089	1.58275e-59	-1.15676	5.1986e-67	0.309717	9.39869e-13
Lung	Stromal cell	chr1:154744675:A:G	cg13983884	1.25949	7.7453e-57	1.27432	4.10689e-74	-0.382076	1.2727e-22
Lung	Stromal cell	chr1:175053071:G:C	cg23658987	1.28214	8.61726e-76	1.27431	3.26988e-83	-0.239093	1.47333e-11
Lung	Stromal cell	chr1:203082762:C:G	cg04395153	-1.15118	5.8661e-52	-1.11261	9.96953e-58	0.339303	9.12485e-13
Lung	Stromal cell	chr2:24744855:T:C	cg14849556	0.9191	5.10993e-37	0.978318	4.58508e-45	0.311618	4.30601e-11
Lung	Stromal cell	chr2:36468477:A:G	cg04259027	-1.0413	5.07041e-46	-1.04423	1.90461e-53	0.311471	2.97668e-12
Lung	Stromal cell	chr2:127128582:C:T	cg14317533	-0.770777	9.05117e-23	-0.720917	1.03715e-28	0.528976	8.04352e-20
Lung	Stromal cell	chr3:133857880:C:G	cg08071363	1.2994	7.69318e-80	1.32824	7.86587e-91	-0.233626	3.74845e-13
Lung	Stromal cell	chr3:134926355:G:A	cg07068406	-1.21179	5.42773e-68	-1.24328	9.40579e-79	0.305671	5.24368e-14
Lung	Stromal cell	chr4:166817044:G:A	cg20296596	1.04963	4.86147e-67	1.06015	2.82422e-78	0.220274	2.48954e-14
Lung	Stromal cell	chr5:163449295:AAGGTCAC:A	cg25620989	1.20239	3.70345e-41	1.13541	6.49118e-44	0.423576	2.18806e-11
Lung	Stromal cell	chr6:41108459:A:G	cg04346459	-1.59349	5.40988e-34	-1.66893	2.89301e-41	0.737804	5.41547e-11
Lung	Stromal cell	chr8:9249128:G:A	cg11070274	1.46006	6.91708e-56	1.41577	2.42667e-60	-0.344624	1.84429e-11
Lung	Stromal cell	chr8:100165529:C:A	cg00191853	1.0175	9.8261e-51	1.03239	2.63459e-58	-0.287875	3.48905e-11
Lung	Stromal cell	chr8:101682352:C:T	cg20585841	-0.935471	1.11453e-19	-1.02699	1.48303e-26	0.445817	1.69578e-11
Lung	Stromal cell	chr9:96117875:C:T	cg03249723	1.23321	3.58815e-73	1.19875	1.02574e-85	-0.308701	1.57707e-18
Lung	Stromal cell	chr9:108785116:C:T	cg13837146	1.24664	5.37897e-38	1.21055	8.49756e-43	-0.415407	1.1399e-11
Lung	Stromal cell	chr10:32988854:C:T	cg00146027	-0.0402417	0.636081	-0.0469252	0.530172	0.566558	2.91244e-11
Lung	Stromal cell	chr10:121452788:A:G	cg08899523	-1.15315	1.63756e-64	-1.16436	2.33187e-71	0.266899	4.43808e-11
Lung	Stromal cell	chr10:127906089:A:G	cg25460273	1.17458	3.26428e-68	1.18965	3.23122e-78	-0.27128	5.86794e-13
Lung	Stromal cell	chr11:76657509:A:G	cg16098618	1.13852	5.77877e-59	1.13485	1.39393e-73	-0.339759	3.26175e-20
Lung	Stromal cell	chr12:68453776:A:G	cg11799593	-0.951386	1.00997e-27	-1.02937	1.76357e-36	0.550688	6.50742e-13
Lung	Stromal cell	chr14:32925125:G:A	cg11787167	1.14912	6.08888e-53	1.17131	7.76422e-63	-0.370992	1.079e-13
Lung	Stromal cell	chr15:67279948:G:A	cg03182226	-1.20956	4.73314e-47	-1.21924	3.01277e-56	0.302281	3.58715e-12
Lung	Stromal cell	chr15:77546077:T:C	cg01984146	-1.10429	5.98664e-52	-1.1404	1.70326e-64	0.410933	5.13468e-16
Lung	Stromal cell	chr19:1095431:T:G	cg18008345	0.990795	4.80124e-29	0.97149	2.22697e-33	-0.459727	3.91711e-12
Lung	Stromal cell	chr19:35309759:G:T	cg22238209	1.39988	2.86429e-67	1.36383	2.64454e-74	-0.287271	7.45383e-14
Colon	Endothelial cell	chr1:226137250:G:T	cg16991637	1.3615	2.21516e-64	1.34529	2.44052e-72	-0.3278	5.89229e-12
Colon	Endothelial cell	chr4:182808049:A:G	cg19182683	1.164	3.33474e-52	1.17939	1.56601e-61	-0.322094	1.04017e-11
Colon	Endothelial cell	chr6:90651637:A:G	cg27624466	0.0703351	0.282865	0.0359206	0.532735	0.426637	3.52391e-11
Colon	Endothelial cell	chr7:1312124:C:T	cg23416895	-0.0467102	0.312967	-0.0554849	0.172037	-0.290542	1.72838e-11
Colon	Endothelial cell	chr11:66595526:A:G	cg24851651	-0.97439	9.27671e-53	-0.974423	1.50642e-59	0.245649	3.58795e-11
Colon	Endothelial cell	chr16:71811773:G:C	cg12521152	-0.418455	0.000233258	-0.299034	0.00230041	-0.811297	1.13245e-12
Colon	Epithelial cell	chr1:1130902:A:G	cg07179016	-0.13366	0.0173946	-0.109507	0.0132353	-0.481094	7.18948e-20
Colon	Epithelial cell	chr1:3293359:A:G	cg14659814	0.286761	1.42871e-10	0.277126	6.15036e-13	-0.298336	4.4896e-14
Colon	Epithelial cell	chr1:3353264:A:G	cg01101873	-0.359854	2.06974e-09	-0.350045	5.4647e-11	-0.364014	4.11406e-12
Colon	Epithelial cell	chr1:7318228:GAGGCACTGAGC:G	cg25072257	-0.555557	4.34995e-13	-0.552413	1.10479e-19	-0.64564	1.20937e-22
Colon	Epithelial cell	chr1:8546965:G:A	cg19564590	-0.48559	4.97875e-17	-0.493737	1.91607e-22	-0.358001	1.47536e-13
Colon	Epithelial cell	chr1:8546965:G:A	cg20416874	-0.689735	2.11611e-18	-0.706525	8.66535e-24	-0.485231	2.71289e-13
Colon	Epithelial cell	chr1:10819511:T:C	cg14193956	0.621173	4.7144e-23	0.537186	1.53077e-22	0.381584	2.65776e-13
Colon	Epithelial cell	chr1:10942574:A:G	cg26153784	-0.556063	1.42259e-13	-0.56026	7.75784e-18	-0.550446	2.92296e-15
Colon	Epithelial cell	chr1:11071610:C:CCT	cg04844344	-0.749874	3.51435e-28	-0.782251	6.17472e-35	-0.35811	1.74703e-11
Colon	Epithelial cell	chr1:11071610:C:CCT	cg07043613	-0.773507	1.32483e-27	-0.804336	1.03557e-33	-0.366109	6.71096e-11
Colon	Epithelial cell	chr1:11071610:C:CCT	cg13390370	-0.721006	1.25896e-25	-0.751938	4.51488e-32	-0.375523	7.80164e-12
Colon	Epithelial cell	chr1:11798900:T:C	cg01958606	0.668651	1.43037e-12	0.557465	1.40419e-11	0.571972	5.51285e-13
Colon	Epithelial cell	chr1:11982204:A:G	cg13216073	0.955505	3.35789e-39	0.910318	8.47461e-43	0.402245	2.25957e-12
Colon	Epithelial cell	chr1:15916987:C:T	cg18973939	-1.13067	5.32846e-25	-1.14284	2.62854e-30	-0.599723	6.86393e-12
Colon	Epithelial cell	chr1:17102690:A:G	cg06746829	-0.877821	2.20337e-42	-0.811693	8.95992e-52	-0.412975	2.65027e-22
Colon	Epithelial cell	chr1:17212578:C:A	cg00954039	-1.0554	5.41634e-58	-1.06729	6.44954e-74	-0.342793	4.06501e-21
Colon	Epithelial cell	chr1:18479350:T:C	cg14356550	-0.606302	1.21769e-12	-0.629798	3.76511e-16	-0.565392	8.25272e-12
Colon	Epithelial cell	chr1:18530443:T:C	cg01730433	1.12272	2.0811e-47	1.18114	1.62307e-57	0.378728	1.86798e-13
Colon	Epithelial cell	chr1:25523715:T:C	cg19815009	-0.995271	8.62629e-36	-1.02365	4.94689e-45	-0.446331	7.96867e-15
Colon	Epithelial cell	chr1:30100000:C:T	cg08471952	0.493658	3.26741e-19	0.439882	2.00211e-24	0.462499	1.22813e-23
Colon	Epithelial cell	chr1:31510416:C:T	cg10143454	-0.878834	2.29939e-34	-0.892966	1.30836e-41	-0.416769	7.59399e-14
Colon	Epithelial cell	chr1:46198577:A:G	cg07862031	1.17004	3.64965e-32	1.16458	2.57052e-37	0.536161	3.04802e-11
Colon	Epithelial cell	chr1:46198577:A:G	cg06787764	0.849764	6.93316e-22	0.843933	4.48103e-27	0.57265	6.71646e-14
Colon	Epithelial cell	chr1:58959410:A:G	cg02779644	0.541951	7.04023e-21	0.535927	5.89525e-30	0.406163	2.74088e-22
Colon	Epithelial cell	chr1:64966237:G:C	cg15472145	-0.40091	2.07533e-07	-0.427937	4.25896e-10	-0.447433	6.48156e-13
Colon	Epithelial cell	chr1:67431276:G:T	cg06764498	-0.654888	3.93804e-16	-0.600426	6.16145e-17	-0.46365	1.24478e-11
Colon	Epithelial cell	chr1:67829225:A:G	cg20790998	-0.510251	4.44233e-22	-0.545221	1.6305e-28	-0.314274	4.85205e-11
Colon	Epithelial cell	chr1:84995229:C:A	cg02621376	0.8107	4.41621e-39	0.79811	6.79142e-54	0.438538	3.95541e-24
Colon	Epithelial cell	chr1:87151258:A:C	cg24809024	0.634984	1.58279e-09	0.658932	4.17783e-12	0.691685	5.18658e-11
Colon	Epithelial cell	chr1:87151258:A:C	cg10914949	1.05052	1.0294e-26	1.06976	3.07818e-37	0.751633	5.5403e-20
Colon	Epithelial cell	chr1:87151258:A:C	cg12687112	1.10868	2.42013e-40	1.12613	3.11049e-53	0.572439	8.93782e-20
Colon	Epithelial cell	chr1:87151258:A:C	cg07389616	1.18797	4.16445e-49	1.20936	3.00392e-60	0.455167	3.241e-15
Colon	Epithelial cell	chr1:94983477:T:C	cg07982651	0.520625	7.25739e-10	0.489028	9.76583e-12	0.630824	3.7696e-14
Colon	Epithelial cell	chr1:109740350:G:T	cg23645476	-0.8372	1.12597e-38	-0.822794	4.1043e-44	-0.349588	3.16232e-11
Colon	Epithelial cell	chr1:109740350:G:T	cg08525331	-1.05162	3.44251e-55	-1.04058	2.12868e-61	-0.317011	6.06406e-11
Colon	Epithelial cell	chr1:109740350:G:T	cg02880629	-1.12688	9.07267e-46	-1.11038	2.3797e-57	-0.521944	6.16202e-19
Colon	Epithelial cell	chr1:111565213:G:C	cg24504171	0.335834	1.37779e-08	0.326487	5.5483e-11	0.436205	3.49189e-16
Colon	Epithelial cell	chr1:153577985:C:T	cg22237022	-1.47353	2.31011e-67	-1.5646	8.81589e-77	0.396746	9.8669e-12
Colon	Epithelial cell	chr1:153615732:G:A	cg08477332	1.22555	4.18637e-74	1.24521	5.53622e-82	0.23825	9.69302e-11
Colon	Epithelial cell	chr1:153633818:AC:A	cg26148377	-0.780412	8.65075e-31	-0.765452	2.52141e-35	-0.381819	1.31927e-11
Colon	Epithelial cell	chr1:153633818:AC:A	cg26548293	-0.84941	6.15256e-36	-0.83737	3.62597e-41	-0.371378	9.09388e-12
Colon	Epithelial cell	chr1:154431860:C:T	cg27397230	0.706692	4.47582e-21	0.712758	4.34939e-25	0.439941	4.17657e-11
Colon	Epithelial cell	chr1:154731249:G:A	cg13572380	-0.484054	1.75881e-30	-0.503051	1.44211e-37	-0.249167	7.27714e-12
Colon	Epithelial cell	chr1:155109464:T:C	cg07923656	-1.19452	1.18812e-73	-1.15812	9.70256e-81	-0.286434	2.56489e-13
Colon	Epithelial cell	chr1:158116625:C:T	cg17345026	1.49328	1.18508e-42	1.48867	5.42659e-54	0.733076	1.62297e-18
Colon	Epithelial cell	chr1:158180266:C:T	cg05046020	0.276867	0.00215311	0.304787	0.000162976	0.609854	7.20214e-11
Colon	Epithelial cell	chr1:171342216:T:G	cg17003250	-1.11909	8.6564e-41	-1.12398	1.02466e-47	-0.447677	4.20329e-12
Colon	Epithelial cell	chr1:175818304:A:G	cg08491091	-0.0466154	0.493306	-0.102995	0.0721229	-0.499951	1.71648e-14
Colon	Epithelial cell	chr1:180517145:G:A	cg11827190	1.01111	7.8852e-30	1.04546	1.79074e-38	0.514742	4.13012e-15
Colon	Epithelial cell	chr1:183727105:C:A	cg18856995	-0.645474	2.87375e-15	-0.728269	8.3816e-24	-0.591811	2.32427e-16
Colon	Epithelial cell	chr1:192525618:C:T	cg15041339	0.431782	1.19618e-13	0.481068	7.82343e-24	0.473383	9.74307e-21
Colon	Epithelial cell	chr1:193976177:A:T	cg20562627	0.640605	2.12363e-14	0.674092	2.59785e-19	0.50611	9.96512e-13
Colon	Epithelial cell	chr1:201505513:CT:C	cg11145461	-0.302901	1.59077e-09	-0.302019	6.57693e-12	-0.345894	9.67509e-13
Colon	Epithelial cell	chr1:202203641:T:G	cg04811114	1.06666	1.24263e-49	1.00631	2.559e-55	0.407462	2.50771e-15
Colon	Epithelial cell	chr1:202203641:T:G	cg05044291	0.982741	8.8232e-36	0.916249	3.17085e-38	0.450163	2.05033e-12
Colon	Epithelial cell	chr1:205258632:G:C	cg16530596	-0.902058	5.64534e-43	-0.871395	6.00235e-52	-0.425169	1.26289e-17
Colon	Epithelial cell	chr1:207890463:G:A	cg27004073	0.700014	2.12792e-23	0.661117	1.64595e-26	0.476438	2.44683e-13
Colon	Epithelial cell	chr1:207890463:G:A	cg21924403	0.574504	1.56337e-21	0.535357	1.56224e-25	0.459139	1.23559e-16
Colon	Epithelial cell	chr1:208260444:T:C	cg06191042	-1.00085	1.1208e-40	-0.965709	1.46954e-44	-0.332658	4.47416e-11
Colon	Epithelial cell	chr1:210293014:A:G	cg09074223	-0.358953	2.0755e-17	-0.362351	2.08938e-22	-0.25518	7.02555e-14
Colon	Epithelial cell	chr1:220817829:C:T	cg26440142	0.434987	3.18021e-12	0.409661	2.31384e-13	0.399318	8.24452e-11
Colon	Epithelial cell	chr1:222653505:A:T	cg21816128	-0.573541	3.22048e-20	-0.534235	9.78557e-23	-0.350557	2.06679e-14
Colon	Epithelial cell	chr1:223623282:T:A	cg00693833	-0.841306	1.98426e-15	-0.740611	6.97016e-16	-0.744733	1.58537e-13
Colon	Epithelial cell	chr1:227154197:G:A	cg24860534	-1.05151	5.0903e-32	-0.999199	7.76986e-35	-0.478156	4.49452e-11
Colon	Epithelial cell	chr1:230281204:C:T	cg17954142	-0.860996	3.60805e-09	-0.889365	1.68444e-12	-0.967693	1.80664e-14
Colon	Epithelial cell	chr1:243666247:G:A	cg23131760	-0.589758	1.87849e-20	-0.568615	2.77562e-23	-0.364576	1.27556e-12
Colon	Epithelial cell	chr1:246503694:G:A	cg14580920	0.530907	5.788e-10	0.499879	1.75542e-11	0.574596	1.41346e-13
Colon	Epithelial cell	chr2:1160798:G:C	cg27418163	-0.818973	9.50785e-24	-0.73289	1.41331e-23	-0.446756	1.82904e-11
Colon	Epithelial cell	chr2:1615448:G:A	cg00040288	-0.5722	9.93478e-13	-0.516002	3.4483e-13	-0.502138	6.76023e-12
Colon	Epithelial cell	chr2:7038949:C:G	cg14990413	0.0382962	0.723932	-0.0981567	0.259038	0.952527	4.76347e-19
Colon	Epithelial cell	chr2:7346340:C:G	cg20760682	0.365106	4.12885e-06	0.35496	2.21228e-07	-0.566073	1.46965e-13
Colon	Epithelial cell	chr2:8312183:G:A	cg12167548	0.603469	7.28513e-20	0.625066	6.64817e-25	0.403014	1.07842e-11
Colon	Epithelial cell	chr2:8571195:G:A	cg23541422	-0.775997	1.36706e-23	-0.81345	3.2909e-35	-0.705395	1.43909e-21
Colon	Epithelial cell	chr2:8571639:T:C	cg14093127	-0.755979	5.74437e-27	-0.795763	5.6001e-36	-0.54671	1.24859e-15
Colon	Epithelial cell	chr2:9750126:C:T	cg04990314	0.39712	2.10565e-13	0.387532	8.85056e-16	0.341989	8.1974e-12
Colon	Epithelial cell	chr2:10471640:G:C	cg23374930	1.10178	4.60669e-30	1.16343	9.59116e-38	-0.536191	5.3317e-12
Colon	Epithelial cell	chr2:10703345:T:C	cg02275511	0.50342	7.65642e-09	0.446175	6.95063e-09	0.499377	2.16322e-11
Colon	Epithelial cell	chr2:10718740:A:G	cg10005305	0.442358	3.01975e-09	0.376243	4.46605e-10	0.533351	3.90038e-19
Colon	Epithelial cell	chr2:23556210:T:G	cg26675212	0.63704	1.75645e-15	0.629296	1.42128e-19	0.525867	3.05367e-14
Colon	Epithelial cell	chr2:24914047:T:C	cg08266286	-0.344002	1.86391e-07	-0.385322	4.32047e-11	-0.469912	4.47489e-13
Colon	Epithelial cell	chr2:27428508:C:T	cg01969012	-1.08585	8.27674e-40	-1.10883	2.42702e-47	-0.470065	1.25609e-12
Colon	Epithelial cell	chr2:36872196:T:C	cg14605244	-0.576079	3.88712e-22	-0.500098	1.36233e-21	-0.369705	4.98062e-13
Colon	Epithelial cell	chr2:43294028:G:A	cg08715262	-0.690752	3.98505e-18	-0.717991	1.22894e-23	0.465365	1.90086e-12
Colon	Epithelial cell	chr2:43884936:A:G	cg02664575	-1.03618	2.01077e-21	-1.04461	2.27425e-26	-0.665316	1.61001e-12
Colon	Epithelial cell	chr2:43885372:T:C	cg02894083	-0.624837	1.43976e-12	-0.632301	2.15133e-15	-0.538465	4.43846e-11
Colon	Epithelial cell	chr2:60353696:A:G	cg07298397	1.08172	1.59729e-44	1.06192	2.1452e-50	0.397554	4.2844e-12
Colon	Epithelial cell	chr2:62803926:GC:G	cg21115199	0.861532	3.74669e-27	0.939523	1.25657e-35	0.478242	2.02405e-12
Colon	Epithelial cell	chr2:70560633:C:G	cg10673353	0.986705	4.14617e-57	0.994765	5.60068e-67	0.327924	1.68808e-13
Colon	Epithelial cell	chr2:70646669:C:T	cg05866798	0.684525	9.55868e-24	0.708641	3.7002e-30	0.476131	2.62845e-13
Colon	Epithelial cell	chr2:98881517:G:A	cg18452202	-0.547645	6.25218e-26	-0.550492	1.65434e-32	-0.329592	3.10335e-14
Colon	Epithelial cell	chr2:101474758:C:T	cg04415270	1.19408	1.42099e-54	1.20648	1.60577e-64	0.352273	1.66869e-14
Colon	Epithelial cell	chr2:102076322:C:T	cg24530225	-0.621506	7.69813e-13	-0.519077	2.31949e-11	-0.46799	7.56759e-11
Colon	Epithelial cell	chr2:106021842:C:T	cg23599385	0.396345	5.94658e-18	0.393094	4.3342e-25	0.353304	3.27876e-19
Colon	Epithelial cell	chr2:113829870:G:A	cg03783904	-0.620936	5.22389e-14	-0.606007	3.54336e-17	-0.486926	9.46878e-13
Colon	Epithelial cell	chr2:113845426:G:T	cg21130420	-0.0492912	0.496929	-0.033525	0.576591	-0.527411	5.91728e-16
Colon	Epithelial cell	chr2:113845426:G:T	cg09947379	-0.761986	5.93609e-27	-0.746203	3.1843e-31	-0.362317	2.76372e-11
Colon	Epithelial cell	chr2:113829870:G:A	cg16192086	-0.857391	1.96768e-37	-0.849662	2.38503e-45	-0.356866	1.59069e-14
Colon	Epithelial cell	chr2:138114401:T:A	cg15818005	-0.554044	1.27692e-20	-0.514176	1.05788e-23	-0.374753	3.0328e-14
Colon	Epithelial cell	chr2:201158996:G:C	cg16040230	0.443644	1.85109e-19	0.397801	2.85228e-23	0.351775	8.63982e-20
Colon	Epithelial cell	chr2:219182253:C:A	cg00303740	1.08597	1.22669e-45	1.05415	7.37381e-54	0.491274	5.83721e-16
Colon	Epithelial cell	chr2:225736047:G:T	cg09608199	-0.88096	3.0184e-26	-0.863011	1.72901e-30	-0.509709	4.91074e-12
Colon	Epithelial cell	chr2:237590675:A:G	cg10458446	0.500454	2.23687e-24	0.451255	1.83544e-35	0.364763	4.86526e-29
Colon	Epithelial cell	chr2:237592733:G:C	cg13856643	0.603255	2.88899e-30	0.572145	2.46547e-36	0.276798	3.56217e-15
Colon	Epithelial cell	chr2:238099114:CATT:C	cg15462953	-0.0773016	0.132217	-0.127374	0.00591425	-0.343172	4.79634e-11
Colon	Epithelial cell	chr2:238459390:C:T	cg26984131	-0.42696	1.15331e-22	-0.439333	1.29698e-28	-0.261292	1.60224e-12
Colon	Epithelial cell	chr2:240896921:T:C	cg20140201	-0.567137	4.25872e-23	-0.576999	2.84692e-33	-0.418301	1.2042e-20
Colon	Epithelial cell	chr2:240902241:G:C	cg09990169	-0.764423	1.05589e-18	-0.768865	1.72226e-24	-0.587446	1.70726e-15
Colon	Epithelial cell	chr2:240896921:T:C	cg04903544	-0.76981	1.3983e-23	-0.782881	1.35632e-32	-0.537978	1.17231e-18
Colon	Epithelial cell	chr2:241797926:T:C	cg07471365	0.152737	0.000105008	0.155837	8.89134e-06	-0.247064	1.89132e-11
Colon	Epithelial cell	chr3:11808433:A:AC	cg09609213	0.389968	2.99038e-17	0.367308	1.19484e-18	0.26258	5.45015e-11
Colon	Epithelial cell	chr3:12983402:T:C	cg01196118	-1.14003	1.21711e-22	-1.11468	8.54276e-29	-0.754533	1.47443e-15
Colon	Epithelial cell	chr3:12983402:T:C	cg16192821	-0.896417	2.8795e-17	-0.87748	2.06072e-21	-0.692137	3.45741e-14
Colon	Epithelial cell	chr3:13496554:C:T	cg24283755	0.571306	1.44976e-23	0.577908	8.53109e-30	0.360358	3.33301e-13
Colon	Epithelial cell	chr3:13497622:T:A	cg13573460	-0.32043	1.2556e-08	-0.352595	3.61724e-12	-0.381373	1.3601e-11
Colon	Epithelial cell	chr3:17647495:TAAGAA:T	cg20981856	0.477044	1.08171e-10	0.458083	1.30151e-12	0.50246	1.41953e-13
Colon	Epithelial cell	chr3:30707448:C:T	cg08672465	0.677055	1.09281e-33	0.687091	4.84546e-40	0.301244	1.80316e-11
Colon	Epithelial cell	chr3:39153769:G:C	cg02254461	-0.604474	1.33892e-20	-0.529539	5.21666e-21	-0.451496	8.68801e-15
Colon	Epithelial cell	chr3:46442770:C:G	cg01427108	-1.22761	2.92638e-97	-1.21859	3.56653e-104	0.177248	3.35746e-11
Colon	Epithelial cell	chr3:49762042:A:C	cg02037349	-0.777334	7.48945e-29	-0.763693	8.42415e-43	-0.587406	3.37208e-26
Colon	Epithelial cell	chr3:52531084:T:C	cg11849564	-0.743263	2.33135e-35	-0.723213	2.24485e-41	-0.348828	2.54968e-13
Colon	Epithelial cell	chr3:58379419:T:A	cg06643156	0.611891	1.75483e-13	0.624477	7.45457e-19	0.570683	2.66704e-17
Colon	Epithelial cell	chr3:58405401:G:A	cg15575675	0.698976	1.32349e-15	0.712086	7.28681e-20	0.511236	6.44789e-13
Colon	Epithelial cell	chr3:59658507:G:A	cg07069742	-0.126449	0.0299575	-0.126105	0.00930677	-0.465453	9.23065e-16
Colon	Epithelial cell	chr3:59655643:A:G	cg04981165	0.389549	5.57668e-08	0.319887	1.57362e-07	0.501929	1.69511e-14
Colon	Epithelial cell	chr3:65179157:T:C	cg22300541	0.793637	2.10093e-53	0.806428	1.52192e-68	0.304196	2.82596e-20
Colon	Epithelial cell	chr3:69702435:T:C	cg24600372	-0.294778	1.50436e-06	-0.247014	2.18621e-06	-0.349889	8.02945e-14
Colon	Epithelial cell	chr3:74464246:A:G	cg11635155	-0.782639	1.92663e-27	-0.801761	1.98069e-35	-0.437489	5.40085e-14
Colon	Epithelial cell	chr3:99967147:G:T	cg05273695	-0.548637	3.1513e-09	-0.533096	3.22588e-11	-0.619699	2.02803e-13
Colon	Epithelial cell	chr3:100870099:T:A	cg00363007	-0.849586	8.86336e-28	-0.892918	1.50819e-35	-0.461287	5.90567e-13
Colon	Epithelial cell	chr3:111842374:C:T	cg04153991	-0.260045	7.20194e-06	-0.270434	1.9161e-07	-0.381113	3.19401e-11
Colon	Epithelial cell	chr3:113532232:G:A	cg00726615	0.363798	1.97195e-09	0.391093	3.89355e-13	0.407162	1.29239e-12
Colon	Epithelial cell	chr3:117860735:T:A	cg13179828	-0.296265	7.76943e-05	-0.238282	0.000251845	-0.475993	9.57052e-13
Colon	Epithelial cell	chr3:120452873:A:G	cg00524377	0.338558	1.58892e-09	0.328422	5.32826e-11	0.346848	2.92877e-11
Colon	Epithelial cell	chr3:121559936:T:C	cg16417163	-0.936392	8.83398e-50	-0.893837	2.02473e-55	-0.331829	2.49733e-14
Colon	Epithelial cell	chr3:122894432:C:T	cg06823220	0.12693	0.0736594	0.12257	0.0430134	-0.538701	9.20076e-14
Colon	Epithelial cell	chr3:123953940:T:C	cg12805451	0.442864	3.26924e-15	0.47361	2.82972e-21	0.408495	9.90766e-15
Colon	Epithelial cell	chr3:124826903:G:A	cg08760243	-0.529097	1.57991e-15	-0.524427	5.89328e-20	-0.515368	3.01657e-15
Colon	Epithelial cell	chr3:125207904:G:C	cg05256313	-0.159071	0.0253842	-0.113027	0.0446125	-0.577981	1.7052e-17
Colon	Epithelial cell	chr3:133736597:A:G	cg17775713	0.291964	2.72736e-05	0.313219	1.388e-07	0.495573	1.39048e-14
Colon	Epithelial cell	chr3:146528263:A:T	cg05128109	-1.27922	1.18166e-35	-1.17535	2.16144e-38	-0.625451	7.63281e-15
Colon	Epithelial cell	chr3:151398203:T:C	cg16899444	-0.522015	1.43223e-20	-0.530394	6.03375e-26	-0.381641	8.3403e-13
Colon	Epithelial cell	chr3:161159308:T:G	cg04691961	-0.107919	0.0506852	-0.129712	0.00823686	0.337577	1.92096e-11
Colon	Epithelial cell	chr3:170557329:A:G	cg05778322	0.837814	2.33278e-20	0.846372	9.94227e-26	0.599242	8.45356e-14
Colon	Epithelial cell	chr3:170557329:A:G	cg01289541	1.0077	9.62091e-27	1.02533	1.35091e-36	0.671648	2.09526e-18
Colon	Epithelial cell	chr3:183913636:T:C	cg14456855	0.0300156	0.73274	-0.0141545	0.850511	0.666251	1.57752e-13
Colon	Epithelial cell	chr3:188191799:C:T	cg03970811	0.897442	4.92749e-15	0.882911	5.97547e-18	0.618418	4.73772e-12
Colon	Epithelial cell	chr3:190124299:A:C	cg02757804	0.415987	1.33208e-18	0.458254	3.70493e-26	0.296097	2.0663e-13
Colon	Epithelial cell	chr3:193777725:C:T	cg06583921	-0.675051	1.06395e-19	-0.643414	6.03217e-24	-0.444432	2.21136e-15
Colon	Epithelial cell	chr3:194058189:CACCCAGGG:C	cg22844232	0.667742	1.36578e-15	0.587581	9.09964e-16	0.492802	6.04789e-13
Colon	Epithelial cell	chr3:195847655:C:T	cg21233763	0.0979955	0.0668746	0.092973	0.0464821	0.374427	5.04574e-12
Colon	Epithelial cell	chr4:815999:C:T	cg02924459	-0.420066	1.67104e-20	-0.457615	5.32181e-29	-0.325431	8.22713e-15
Colon	Epithelial cell	chr4:7916866:A:T	cg22870092	0.310282	1.57633e-10	0.285082	2.01453e-12	0.308571	1.73092e-16
Colon	Epithelial cell	chr4:8259085:C:G	cg19241973	-0.343979	1.05392e-07	-0.257285	3.27426e-06	-0.404043	2.5427e-13
Colon	Epithelial cell	chr4:25971556:C:T	cg18246393	-0.700748	2.69526e-28	-0.690704	1.63107e-35	-0.348515	7.32513e-15
Colon	Epithelial cell	chr4:45932601:C:T	cg08046784	1.06968	4.83614e-61	1.07988	3.81966e-69	0.301779	8.80119e-11
Colon	Epithelial cell	chr4:56859155:G:A	cg03429763	0.867203	7.10261e-16	0.860086	3.14092e-19	0.603738	2.02326e-11
Colon	Epithelial cell	chr4:61157076:C:G	cg05267242	0.0500928	0.416461	0.0650181	0.232307	0.385932	6.52202e-11
Colon	Epithelial cell	chr4:69607286:T:G	cg19874327	0.619976	2.23494e-18	0.524213	1.84853e-16	0.378405	1.27841e-11
Colon	Epithelial cell	chr4:94649014:T:C	cg00096603	0.00173794	0.977667	-0.0503246	0.334672	0.494845	4.68046e-15
Colon	Epithelial cell	chr4:120770994:A:G	cg20535653	-1.10238	6.32152e-68	-1.11984	4.52609e-83	-0.322485	5.2307e-19
Colon	Epithelial cell	chr4:121957381:T:C	cg02239754	-0.896814	2.73808e-26	-0.792182	9.99892e-26	-0.531227	4.38595e-12
Colon	Epithelial cell	chr4:139628325:A:G	cg27291695	-1.20586	4.75706e-35	-1.18765	5.35035e-40	-0.564014	2.78374e-11
Colon	Epithelial cell	chr4:151688542:A:G	cg19877363	0.827991	9.21742e-22	0.820031	6.00995e-26	0.536802	5.91121e-12
Colon	Epithelial cell	chr4:151722820:C:T	cg21241017	0.834105	8.41954e-22	0.812134	1.05577e-27	0.636579	1.48043e-16
Colon	Epithelial cell	chr4:176872199:C:T	cg22648556	-1.13962	5.62209e-48	-1.10186	1.01135e-55	-0.368309	8.87592e-16
Colon	Epithelial cell	chr4:184100427:C:T	cg06737308	1.23299	3.24662e-86	1.20967	7.21009e-94	0.22069	6.03997e-12
Colon	Epithelial cell	chr5:430102:C:T	cg26850624	-0.655068	6.74635e-18	-0.608762	3.44013e-19	-0.394417	1.38551e-11
Colon	Epithelial cell	chr5:653228:T:C	cg19506628	0.736813	4.84219e-27	0.722686	1.01718e-32	0.444274	2.49695e-14
Colon	Epithelial cell	chr5:9617400:C:T	cg14362298	0.92848	2.4818e-42	0.901762	2.82246e-48	0.357591	6.23427e-13
Colon	Epithelial cell	chr5:13495923:C:G	cg23195327	0.672922	1.22625e-21	0.631294	2.04819e-23	0.39026	4.39367e-11
Colon	Epithelial cell	chr5:16508565:A:G	cg20273531	-0.872553	5.00613e-29	-0.892031	6.27423e-35	-0.414218	3.27993e-11
Colon	Epithelial cell	chr5:35161230:A:G	cg21232981	0.349518	1.99792e-12	0.365419	1.90413e-16	0.349775	6.81504e-13
Colon	Epithelial cell	chr5:61034039:G:C	cg18089146	1.07326	5.60228e-37	1.09382	1.22095e-46	0.513925	1.51403e-15
Colon	Epithelial cell	chr5:68973751:A:G	cg15524731	-0.475975	1.91792e-20	-0.480601	4.96095e-29	-0.372011	9.33748e-20
Colon	Epithelial cell	chr5:72584368:T:C	cg00724606	-0.589145	8.496e-22	-0.548677	1.70901e-25	-0.416211	1.3258e-15
Colon	Epithelial cell	chr5:73118856:G:GTAATAAA	cg14617041	-0.899045	1.36039e-25	-0.890107	1.96973e-34	-0.606316	9.48334e-20
Colon	Epithelial cell	chr5:73118856:G:GTAATAAA	cg15518950	-0.806845	2.65405e-27	-0.80037	9.69116e-35	-0.484211	9.2353e-17
Colon	Epithelial cell	chr5:95691265:A:G	cg10718026	0.500749	2.71315e-09	0.482335	2.61513e-11	0.601533	1.60204e-13
Colon	Epithelial cell	chr5:102782303:C:T	cg01355407	-0.630464	1.94696e-24	-0.678589	1.53245e-31	-0.345738	8.88182e-12
Colon	Epithelial cell	chr5:108564396:C:T	cg25075504	-0.525421	8.62661e-24	-0.521983	2.29399e-28	-0.297955	7.95202e-12
Colon	Epithelial cell	chr5:127663801:T:G	cg17080727	-0.964238	6.81059e-31	-0.982816	1.40658e-36	-0.425385	9.10703e-11
Colon	Epithelial cell	chr5:132101145:C:T	cg09062922	-0.986995	2.25518e-56	-0.952462	1.51031e-62	-0.278753	3.90796e-13
Colon	Epithelial cell	chr5:132449486:C:T	cg02682369	0.76583	2.31467e-20	0.809283	1.55705e-28	0.544742	6.83804e-16
Colon	Epithelial cell	chr5:135030510:A:G	cg24576358	0.313046	3.35257e-11	0.289337	1.26286e-12	0.343888	2.93949e-14
Colon	Epithelial cell	chr5:135461634:T:A	cg06324419	-0.759036	1.44343e-27	-0.743015	1.09837e-31	-0.363304	1.68064e-11
Colon	Epithelial cell	chr5:173715579:T:A	cg03583853	0.934778	2.09215e-41	0.906329	9.82942e-49	0.385389	1.79511e-15
Colon	Epithelial cell	chr5:173860760:G:A	cg10346658	-0.598191	1.80446e-14	-0.641346	3.49526e-23	-0.698409	4.99424e-21
Colon	Epithelial cell	chr5:177367190:G:A	cg25922969	0.390894	6.8581e-17	0.363101	2.16565e-19	0.309035	6.35349e-15
Colon	Epithelial cell	chr6:1252877:G:T	cg07838381	-0.494711	1.19376e-15	-0.490706	2.7672e-20	-0.43852	1.25055e-15
Colon	Epithelial cell	chr6:5073058:C:G	cg21641834	0.815499	7.44322e-19	0.924724	4.94863e-28	0.668399	8.56256e-15
Colon	Epithelial cell	chr6:6851305:A:G	cg22775635	0.897194	4.02025e-45	0.892941	1.79833e-56	0.362104	3.27895e-18
Colon	Epithelial cell	chr6:6938057:C:T	cg22748944	-0.471153	4.50882e-15	-0.531583	1.50277e-23	-0.416939	2.46218e-15
Colon	Epithelial cell	chr6:10575672:CT:C	cg08029150	0.667451	1.17772e-17	0.676837	1.01408e-24	0.48819	6.13289e-18
Colon	Epithelial cell	chr6:28187640:T:C	cg02683197	0.782087	5.02449e-24	0.778001	1.38987e-34	0.596576	3.82947e-22
Colon	Epithelial cell	chr6:28107147:C:A	cg06470822	0.803355	6.73607e-20	0.801258	6.35419e-24	0.523982	1.07136e-11
Colon	Epithelial cell	chr6:28187640:T:C	cg03623178	0.989536	1.15709e-24	0.984837	7.12613e-29	0.541422	6.06221e-11
Colon	Epithelial cell	chr6:28070115:G:T	cg03111404	0.739837	2.32329e-19	0.75019	2.53298e-26	0.582342	6.55629e-17
Colon	Epithelial cell	chr6:28187640:T:C	cg12172441	0.734092	2.43871e-18	0.729957	4.39005e-22	0.512579	8.07869e-12
Colon	Epithelial cell	chr6:28192182:T:C	cg25164649	0.765507	5.86797e-14	0.770776	1.03369e-17	0.675522	2.78868e-13
Colon	Epithelial cell	chr6:28756302:T:G	cg02196503	0.46269	1.79393e-13	0.451715	2.54594e-17	0.414435	4.0076e-16
Colon	Epithelial cell	chr6:29994621:G:A	cg23313031	0.918605	8.28962e-19	1.00769	3.0119e-25	0.649226	2.35783e-11
Colon	Epithelial cell	chr6:29994621:G:A	cg19448822	0.941989	4.52246e-18	1.03662	6.95792e-25	0.704405	4.0243e-12
Colon	Epithelial cell	chr6:31494689:G:A	cg10715529	-0.790267	1.73928e-25	-0.750569	7.22464e-30	-0.539847	1.88057e-14
Colon	Epithelial cell	chr6:32742775:G:A	cg02293354	0.0567468	0.338746	0.0796055	0.116701	0.426236	3.56649e-14
Colon	Epithelial cell	chr6:33105299:G:A	cg09676013	0.680938	7.82635e-20	0.677647	2.36369e-24	0.498542	5.01405e-13
Colon	Epithelial cell	chr6:36388225:A:G	cg14159011	-1.07343	1.75363e-55	-1.02482	1.02684e-68	-0.362888	6.42202e-23
Colon	Epithelial cell	chr6:47656393:G:A	cg16361253	0.302259	0.00482158	0.430422	1.84999e-06	0.901193	3.65358e-16
Colon	Epithelial cell	chr6:54046190:T:G	cg21907309	-1.0559	2.15319e-38	-0.986862	1.14694e-39	-0.331145	5.11191e-11
Colon	Epithelial cell	chr6:89021785:G:C	cg20429994	-0.990415	6.37313e-17	-0.916522	3.86163e-20	-0.856629	1.10558e-16
Colon	Epithelial cell	chr6:107822548:A:G	cg27659622	0.417531	5.35527e-07	0.438695	5.02885e-09	0.500894	4.61523e-11
Colon	Epithelial cell	chr6:109304593:T:C	cg12709746	0.806065	1.36019e-19	0.772214	7.03946e-23	0.541246	2.16583e-13
Colon	Epithelial cell	chr6:109304593:T:C	cg14587050	0.563135	1.29661e-12	0.531678	2.58352e-14	0.490639	1.61426e-12
Colon	Epithelial cell	chr6:113024691:T:C	cg08570639	0.00324217	0.959382	-0.0743238	0.182812	-0.4839	1.6362e-13
Colon	Epithelial cell	chr6:113695481:C:T	cg06052655	0.796749	9.41933e-27	0.80159	1.29833e-34	0.48556	3.32755e-16
Colon	Epithelial cell	chr6:116545786:A:G	cg00953399	0.787599	7.41916e-16	0.731616	6.03815e-17	0.621929	2.50513e-11
Colon	Epithelial cell	chr6:138796035:G:A	cg14062002	0.902544	4.31059e-41	0.938895	2.33675e-50	0.427947	1.525e-13
Colon	Epithelial cell	chr6:142841888:A:G	cg06538751	0.647672	9.80324e-10	0.704953	2.11269e-13	0.691515	1.61348e-11
Colon	Epithelial cell	chr6:151676694:C:T	cg15605023	-0.840375	2.67976e-21	-0.850322	2.71469e-26	-0.584128	1.8528e-12
Colon	Epithelial cell	chr6:161434438:C:T	cg11110934	-0.453742	1.40864e-16	-0.430338	6.34833e-23	-0.44676	2.4885e-22
Colon	Epithelial cell	chr6:165987366:G:A	cg09830769	1.12238	1.03795e-25	0.936188	4.47899e-23	0.547209	1.28987e-13
Colon	Epithelial cell	chr6:167219370:C:G	cg24463509	-0.987573	3.46437e-41	-0.916501	8.39255e-45	-0.430426	4.82171e-14
Colon	Epithelial cell	chr6:167275452:C:G	cg05254236	0.695896	4.29863e-21	0.731034	8.89285e-34	0.639055	1.91742e-24
Colon	Epithelial cell	chr6:167274837:G:A	cg05165281	0.659859	3.66208e-19	0.663527	3.6091e-24	0.51991	3.80538e-14
Colon	Epithelial cell	chr6:167793849:CA:C	cg25471802	0.538383	1.00166e-11	0.492248	2.05409e-13	0.522962	3.28098e-15
Colon	Epithelial cell	chr6:167793770:C:T	cg03298716	0.530807	1.03353e-19	0.511988	2.27508e-23	0.356211	3.46143e-14
Colon	Epithelial cell	chr6:167793770:C:T	cg05733780	0.690978	3.2012e-25	0.665953	1.60631e-31	0.43241	8.11589e-18
Colon	Epithelial cell	chr6:169011303:C:T	cg08198203	-0.751176	8.7862e-27	-0.753934	5.14969e-32	-0.392114	8.4127e-12
Colon	Epithelial cell	chr7:3181776:G:C	cg25704036	0.55553	1.465e-23	0.533754	1.33593e-27	0.354329	8.64791e-14
Colon	Epithelial cell	chr7:3181776:G:C	cg18002126	0.622582	5.05776e-29	0.600186	1.42587e-35	0.372507	9.94584e-17
Colon	Epithelial cell	chr7:23352652:T:C	cg22208997	0.440865	1.87348e-21	0.42478	1.58463e-24	0.236276	1.99795e-11
Colon	Epithelial cell	chr7:36280605:A:G	cg01314165	-0.2563	0.00416772	-0.23082	0.00283387	-0.604633	7.28159e-13
Colon	Epithelial cell	chr7:36286444:C:A	cg25854875	-0.913763	1.78312e-26	-0.905526	3.15445e-32	-0.532998	2.08617e-13
Colon	Epithelial cell	chr7:47827752:A:G	cg27618305	-0.885072	2.4692e-37	-0.874791	2.6819e-43	-0.374809	6.64757e-13
Colon	Epithelial cell	chr7:47827752:A:G	cg21516930	-0.901587	3.68894e-39	-0.891739	8.90265e-48	-0.408972	2.50695e-16
Colon	Epithelial cell	chr7:51604273:T:C	cg16745057	-0.750399	1.41534e-21	-0.681517	2.74902e-22	-0.451152	4.89762e-12
Colon	Epithelial cell	chr7:55177954:T:C	cg15234730	0.708566	2.86135e-12	0.647277	9.69907e-13	0.669753	5.93705e-12
Colon	Epithelial cell	chr7:75676776:CA:C	cg22535104	0.546233	5.77248e-17	0.498078	1.79562e-17	0.364275	3.39581e-11
Colon	Epithelial cell	chr7:90770577:A:G	cg24118526	-0.260896	7.7556e-08	-0.309661	1.46595e-12	-0.345382	1.50503e-11
Colon	Epithelial cell	chr7:96251217:C:T	cg06098425	-0.926139	7.82671e-50	-0.902647	1.11528e-57	-0.316662	8.40209e-14
Colon	Epithelial cell	chr7:96276451:G:A	cg17096719	0.65536	6.71912e-19	0.670483	7.10811e-24	0.439524	5.25959e-12
Colon	Epithelial cell	chr7:98167323:C:T	cg21770322	0.95663	1.09315e-38	0.907126	6.56844e-43	0.430315	5.91689e-15
Colon	Epithelial cell	chr7:101158134:T:C	cg07564933	-0.878321	1.86835e-14	-0.892957	1.13489e-17	-0.680575	2.12279e-11
Colon	Epithelial cell	chr7:101158134:T:C	cg13324919	-0.903098	2.02156e-17	-0.922372	3.48306e-22	-0.6698	1.88732e-13
Colon	Epithelial cell	chr7:101561660:G:A	cg20364044	0.704556	2.36548e-26	0.68916	8.02387e-34	0.46046	8.12198e-18
Colon	Epithelial cell	chr7:104957222:A:T	cg25691038	-0.935698	4.77768e-32	-0.899203	9.84991e-40	-0.574121	5.21969e-18
Colon	Epithelial cell	chr7:111855897:G:A	cg02401247	-0.198023	4.12855e-05	-0.150212	0.00019983	-0.337996	2.47822e-12
Colon	Epithelial cell	chr7:121309488:G:C	cg04368237	0.485342	5.81572e-07	0.383878	1.06883e-05	0.622342	2.92322e-11
Colon	Epithelial cell	chr7:129097904:T:A	cg12428558	-1.1989	3.62285e-58	-1.2088	4.40339e-68	-0.371355	6.19487e-14
Colon	Epithelial cell	chr7:130369512:G:T	cg03229158	-0.92506	1.86644e-34	-0.918416	2.42022e-39	-0.390003	3.46623e-11
Colon	Epithelial cell	chr7:135261427:T:C	cg18168249	-0.955102	1.46405e-53	-0.991792	1.26031e-64	-0.321451	2.86419e-14
Colon	Epithelial cell	chr7:140007340:A:G	cg03604364	-0.56686	2.00495e-21	-0.57541	3.83079e-26	-0.356636	3.92199e-13
Colon	Epithelial cell	chr7:150374516:G:A	cg09137301	0.444745	1.76752e-14	0.453611	2.69189e-18	0.360355	5.26875e-12
Colon	Epithelial cell	chr7:150340727:T:G	cg17279839	1.06754	9.1668e-47	1.08984	1.20551e-54	0.379809	9.38869e-12
Colon	Epithelial cell	chr7:150340571:A:G	cg16880773	1.04187	5.58849e-46	1.06349	2.7311e-54	0.384899	2.47935e-12
Colon	Epithelial cell	chr7:150340571:A:G	cg27494647	0.96732	3.44152e-43	0.989459	3.60107e-53	0.40786	1.42055e-14
Colon	Epithelial cell	chr7:150340722:C:CG	cg04417677	0.597713	3.55814e-25	0.622199	1.17652e-34	0.416839	3.04592e-17
Colon	Epithelial cell	chr7:150348821:C:A	cg12562418	0.206412	0.00422205	0.229892	0.000331587	0.494091	2.31005e-11
Colon	Epithelial cell	chr7:155962079:T:C	cg11885975	-0.955856	2.4652e-29	-0.919404	5.54199e-36	-0.553786	2.29075e-16
Colon	Epithelial cell	chr7:157102389:T:G	cg01580578	-0.476866	3.59543e-13	-0.52512	6.49013e-19	-0.437169	2.16956e-13
Colon	Epithelial cell	chr7:157141635:T:C	cg05182265	-1.15608	3.97334e-66	-1.15971	3.21601e-76	-0.30865	3.24284e-14
Colon	Epithelial cell	chr8:6868400:G:C	cg25035007	0.782183	5.05481e-15	0.817788	2.00726e-19	0.556128	1.66675e-11
Colon	Epithelial cell	chr8:9147783:CTAAT:C	cg20400248	0.448769	1.19627e-14	0.399237	6.62022e-16	0.418707	2.06888e-15
Colon	Epithelial cell	chr8:11795519:A:G	cg09611679	-0.321843	4.55217e-08	-0.332279	8.77641e-11	-0.445565	8.8789e-14
Colon	Epithelial cell	chr8:11848720:T:C	cg08262993	-0.745476	1.71651e-24	-0.739599	2.89449e-33	-0.502883	1.73398e-18
Colon	Epithelial cell	chr8:11848720:T:C	cg19347259	-0.809567	1.89723e-23	-0.800997	4.2607e-31	-0.56586	4.16155e-18
Colon	Epithelial cell	chr8:11848720:T:C	cg22570104	-0.185581	0.0501571	-0.174849	0.0343264	-0.6392	3.70176e-12
Colon	Epithelial cell	chr8:11849460:CG:C	cg26754383	-0.743265	1.38137e-20	-0.735402	3.5754e-26	-0.527832	2.69034e-15
Colon	Epithelial cell	chr8:11862718:G:C	cg01002857	0.848386	3.92901e-36	0.822171	5.48579e-46	0.470703	3.93521e-20
Colon	Epithelial cell	chr8:11862718:G:C	cg09087222	0.917408	4.48291e-33	0.881055	2.99954e-42	0.542015	4.68769e-20
Colon	Epithelial cell	chr8:22067703:C:G	cg14837598	-0.59342	2.7545e-11	-0.529517	2.11789e-11	-0.502748	3.1369e-11
Colon	Epithelial cell	chr8:22060578:A:C	cg04662594	0.793558	1.26663e-12	0.704992	1.29835e-13	0.642227	1.26877e-14
Colon	Epithelial cell	chr8:27481837:T:C	cg07150473	-1.0657	2.17867e-11	-0.952357	4.94672e-12	-0.8235	6.04016e-13
Colon	Epithelial cell	chr8:27481837:T:C	cg04953015	-1.09213	3.44854e-13	-0.983274	2.15122e-14	-0.774067	1.99942e-13
Colon	Epithelial cell	chr8:28090017:A:G	cg00031705	-0.000119963	0.999026	0.00443528	0.959139	-0.61715	2.94318e-11
Colon	Epithelial cell	chr8:38551804:G:A	cg08986840	-0.554852	4.58715e-10	-0.501017	3.95496e-10	-0.44343	9.68376e-11
Colon	Epithelial cell	chr8:38836865:T:G	cg17297333	0.30862	6.11489e-08	0.325524	4.1414e-11	0.39782	2.96828e-14
Colon	Epithelial cell	chr8:66117705:C:G	cg10646924	0.101934	0.27509	0.01263	0.874712	0.60776	7.72671e-14
Colon	Epithelial cell	chr8:69832577:G:A	cg03719092	-0.9038	4.21168e-42	-0.904727	2.48288e-49	-0.386653	1.09177e-12
Colon	Epithelial cell	chr8:80095704:G:T	cg10933148	0.660106	3.27493e-27	0.656809	1.39161e-32	0.326265	1.2805e-12
Colon	Epithelial cell	chr8:100809577:T:C	cg05314679	-0.967487	3.59121e-27	-0.876468	1.30673e-27	-0.496466	1.23024e-11
Colon	Epithelial cell	chr8:109390227:T:G	cg15640508	-0.610532	2.21147e-26	-0.606243	2.08272e-31	-0.3454	2.54886e-12
Colon	Epithelial cell	chr8:118041805:C:G	cg13744613	-0.312651	2.27842e-08	-0.350453	5.8182e-12	0.357233	2.89755e-11
Colon	Epithelial cell	chr8:119206063:C:T	cg27215916	-0.868307	3.13364e-30	-0.905703	3.99816e-41	-0.53856	4.92737e-17
Colon	Epithelial cell	chr8:119878346:A:G	cg21657326	0.470558	9.56083e-16	0.451498	3.83631e-19	0.418602	5.69859e-15
Colon	Epithelial cell	chr8:129241197:G:C	cg16675872	0.638302	1.37265e-11	0.553327	1.94445e-15	0.84663	1.02982e-26
Colon	Epithelial cell	chr8:133351191:T:C	cg25030508	0.358333	1.28341e-16	0.335583	3.34703e-18	0.265774	8.78216e-12
Colon	Epithelial cell	chr8:133978286:G:A	cg15550804	0.449433	5.05742e-10	0.393101	1.46409e-09	0.463207	3.49219e-11
Colon	Epithelial cell	chr8:134536799:T:C	cg07299736	-0.916341	4.86455e-25	-0.930416	1.99327e-33	-0.600622	1.09821e-16
Colon	Epithelial cell	chr8:134536799:T:C	cg13086574	-0.861549	1.29464e-23	-0.875062	7.33803e-30	-0.527981	3.24802e-13
Colon	Epithelial cell	chr8:134527340:C:G	cg08770998	-0.999134	2.55545e-24	-1.06249	2.3637e-33	-0.673984	1.36167e-15
Colon	Epithelial cell	chr8:139906233:A:C	cg05598481	0.867496	2.78393e-25	0.782883	4.06095e-30	0.550587	1.87092e-19
Colon	Epithelial cell	chr8:139911832:G:A	cg06874250	0.987003	2.7232e-32	0.899809	1.57606e-45	0.626246	1.00288e-30
Colon	Epithelial cell	chr8:139911832:G:A	cg02818464	0.846151	6.72441e-27	0.769677	7.58025e-33	0.528568	9.59664e-21
Colon	Epithelial cell	chr8:140185019:G:A	cg06816751	-0.81398	1.39565e-31	-0.836182	5.81009e-38	-0.383975	5.4654e-11
Colon	Epithelial cell	chr8:141097782:CT:C	cg10015467	-0.54489	1.61982e-18	-0.554162	3.45566e-24	-0.423169	1.49316e-14
Colon	Epithelial cell	chr8:142399832:G:A	cg24996280	0.835927	4.14517e-23	0.761586	1.23526e-30	0.624354	7.41783e-24
Colon	Epithelial cell	chr8:143161975:C:T	cg06411121	0.186016	0.000330179	0.171625	0.000171635	0.329397	1.35953e-11
Colon	Epithelial cell	chr8:143275309:C:G	cg15707110	0.0753007	0.0566175	0.0785485	0.0245549	0.252343	3.64346e-11
Colon	Epithelial cell	chr8:143511626:G:C	cg12688965	0.58306	1.23113e-31	0.619793	3.82713e-47	0.399363	1.22119e-22
Colon	Epithelial cell	chr8:143496149:A:G	cg16495621	0.67752	4.76552e-26	0.714946	7.13936e-34	0.427549	2.94182e-13
Colon	Epithelial cell	chr9:461756:A:G	cg13447502	-1.08902	1.61588e-19	-1.17113	2.73061e-26	-0.780593	3.26596e-12
Colon	Epithelial cell	chr9:4151202:C:A	cg18988395	0.1145	0.112371	0.0385894	0.535478	0.470299	1.20576e-11
Colon	Epithelial cell	chr9:38089972:C:T	cg04327959	0.499172	1.63629e-14	0.516138	8.63462e-20	0.49521	1.16628e-16
Colon	Epithelial cell	chr9:78064390:C:G	cg17923271	0.832396	1.9749e-21	0.839172	1.05713e-26	0.597285	4.18577e-13
Colon	Epithelial cell	chr9:88267143:G:A	cg26955041	-0.34199	4.05073e-17	-0.362156	2.3195e-24	-0.296505	7.09437e-14
Colon	Epithelial cell	chr9:95782745:G:T	cg12218330	0.080142	0.0430228	0.0923182	0.00544696	0.308097	2.30206e-15
Colon	Epithelial cell	chr9:95772090:T:C	cg22975387	-0.148202	0.0253145	-0.114907	0.033219	0.532764	2.90331e-17
Colon	Epithelial cell	chr9:95772090:T:C	cg24007924	-0.134891	0.0223743	-0.103196	0.0267841	0.501152	1.36245e-19
Colon	Epithelial cell	chr9:97399322:T:G	cg22925256	-1.26314	1.03539e-45	-1.24223	2.23452e-54	-0.485527	1.367e-15
Colon	Epithelial cell	chr9:107918980:C:G	cg17222014	-0.464388	7.38819e-15	-0.431126	3.77845e-18	-0.465379	2.46521e-17
Colon	Epithelial cell	chr9:112788960:T:C	cg23676568	0.756179	4.94769e-17	0.650547	4.58752e-16	0.499311	1.0284e-11
Colon	Epithelial cell	chr9:127876188:C:T	cg01270975	-0.648737	3.56853e-16	-0.606022	4.01126e-18	-0.46388	4.29364e-13
Colon	Epithelial cell	chr10:1169928:A:G	cg24150032	0.569911	7.65743e-14	0.567576	8.66002e-17	0.481525	9.13537e-12
Colon	Epithelial cell	chr10:3130651:C:T	cg15087907	-0.795009	4.57994e-27	-0.754312	3.60853e-30	-0.382906	2.61027e-11
Colon	Epithelial cell	chr10:3141555:A:G	cg08713344	1.33531	4.12342e-72	1.3174	1.12355e-80	0.348515	7.38626e-14
Colon	Epithelial cell	chr10:3655659:G:T	cg23307878	-0.281848	5.17972e-18	-0.289393	1.48749e-22	-0.195075	5.01778e-12
Colon	Epithelial cell	chr10:11046115:C:T	cg05833351	-0.762404	3.9541e-35	-0.747965	4.07602e-45	-0.38049	2.68558e-19
Colon	Epithelial cell	chr10:11046115:C:T	cg06352464	-0.723542	2.60546e-28	-0.706657	6.21847e-35	-0.389795	8.03479e-16
Colon	Epithelial cell	chr10:12482638:G:A	cg04687190	-0.125326	0.0813263	-0.166638	0.00765221	0.471766	4.59429e-13
Colon	Epithelial cell	chr10:18165113:A:T	cg12643710	0.482796	2.18747e-15	0.483562	5.34615e-21	0.450294	5.46044e-17
Colon	Epithelial cell	chr10:32347409:T:G	cg09075096	-0.483934	4.91746e-24	-0.493394	2.10346e-35	-0.346284	1.67748e-22
Colon	Epithelial cell	chr10:34425758:C:T	cg27053542	-0.226821	5.1047e-06	-0.233116	8.80211e-08	-0.369871	6.6993e-13
Colon	Epithelial cell	chr10:34810658:C:G	cg19891167	0.861855	2.78851e-48	0.875095	1.0055e-57	0.293292	5.89755e-14
Colon	Epithelial cell	chr10:34966173:A:G	cg08583969	-0.687523	1.53145e-38	-0.653736	5.67125e-43	-0.282584	4.25895e-13
Colon	Epithelial cell	chr10:43698464:G:A	cg03963250	-0.860765	5.12284e-24	-0.858487	1.55206e-28	-0.502906	2.80802e-11
Colon	Epithelial cell	chr10:46278758:T:C	cg27009374	1.12073	8.82582e-44	1.15353	6.53021e-52	-0.396619	3.80701e-12
Colon	Epithelial cell	chr10:47236378:C:A	cg05760192	0.418266	3.84194e-19	0.407493	9.27681e-23	0.312262	2.89603e-13
Colon	Epithelial cell	chr10:49144675:A:T	cg12771178	0.985911	1.9824e-43	0.923136	8.64147e-54	0.422946	3.42708e-22
Colon	Epithelial cell	chr10:58811167:G:A	cg18019314	-0.600766	9.41853e-20	-0.555237	1.52536e-22	-0.421956	2.56051e-15
Colon	Epithelial cell	chr10:59678952:T:C	cg22380090	-0.621746	1.7019e-30	-0.650373	1.57173e-49	-0.444054	7.99605e-29
Colon	Epithelial cell	chr10:71175505:TA:T	cg20554948	-0.925877	1.92977e-32	-0.881528	6.68354e-37	-0.44471	2.23342e-14
Colon	Epithelial cell	chr10:71504513:A:G	cg11932029	0.867612	1.45064e-34	0.86222	3.61213e-48	0.436812	1.82069e-22
Colon	Epithelial cell	chr10:77157477:ATTC:A	cg26008518	0.593401	1.83372e-13	0.615254	2.54337e-17	0.502221	8.17632e-12
Colon	Epithelial cell	chr10:77770455:C:T	cg13782214	-0.175196	0.0179733	-0.184619	0.00504972	-0.458167	6.62051e-11
Colon	Epithelial cell	chr10:78927812:A:G	cg07470273	-0.550753	1.7909e-22	-0.532227	2.73217e-30	-0.352419	1.29015e-20
Colon	Epithelial cell	chr10:84264443:A:G	cg23378765	-0.482808	1.44573e-13	-0.498593	1.37407e-17	-0.436133	1.79286e-14
Colon	Epithelial cell	chr10:86750340:A:G	cg23219751	-0.48664	1.53809e-13	-0.491234	1.15025e-18	-0.429122	2.2449e-15
Colon	Epithelial cell	chr10:94348345:G:C	cg07889765	-1.41725	1.16375e-63	-1.46974	2.64856e-76	-0.422146	1.13452e-14
Colon	Epithelial cell	chr10:94348345:G:C	cg08923894	-1.34079	8.43877e-54	-1.39378	3.29127e-63	-0.415692	3.06829e-11
Colon	Epithelial cell	chr10:99344631:T:C	cg26459859	0.738539	5.68544e-16	0.730395	5.84886e-20	0.553278	2.37946e-13
Colon	Epithelial cell	chr10:114097317:C:T	cg17227926	0.683106	6.99212e-17	0.692267	9.92786e-21	0.527303	1.92958e-11
Colon	Epithelial cell	chr10:116847717:T:C	cg17677490	0.586536	2.07154e-30	0.545879	9.08749e-34	0.304262	7.61375e-14
Colon	Epithelial cell	chr10:116891485:C:T	cg19263868	-0.481853	5.88985e-12	-0.445221	1.43005e-13	-0.45865	3.04465e-14
Colon	Epithelial cell	chr10:118758580:CTTAGACCTGGATTCCAGAGCCCTTTACTGGAAAGGGTATGGACTCA:C	cg21256342	-0.49055	8.35213e-15	-0.487829	6.00907e-18	-0.40456	1.61427e-12
Colon	Epithelial cell	chr10:119619456:CT:C	cg26808749	-1.08412	6.93621e-32	-1.08887	8.60658e-38	-0.505118	1.28762e-11
Colon	Epithelial cell	chr10:123905062:A:AGC	cg15037851	0.25028	0.000217153	0.194542	0.00034232	0.564499	2.3959e-19
Colon	Epithelial cell	chr10:127907130:A:G	cg14733016	-0.23032	0.0019992	-0.226835	0.000403582	-0.528131	2.14001e-13
Colon	Epithelial cell	chr10:132235613:G:A	cg00929254	-0.152877	0.00176909	-0.145229	0.000730964	-0.308188	2.45976e-11
Colon	Epithelial cell	chr10:132742269:C:T	cg02045164	-0.804074	2.21464e-39	-0.820033	1.04975e-46	-0.298654	2.30764e-11
Colon	Epithelial cell	chr10:132901770:T:C	cg09288312	0.0466631	0.753666	0.00564098	0.965392	-0.707793	3.89538e-11
Colon	Epithelial cell	chr11:2420060:AGGCCCCCACGGCCCAGGTCTC:A	cg02172658	0.127862	0.000307137	0.130311	1.82387e-05	-0.251827	1.39192e-12
Colon	Epithelial cell	chr11:7537995:C:G	cg15626731	-0.550661	1.38961e-22	-0.523617	2.21537e-25	-0.306722	3.88957e-11
Colon	Epithelial cell	chr11:9969223:G:T	cg04073358	1.12643	2.53573e-32	1.1705	4.25133e-43	-0.592247	7.86567e-17
Colon	Epithelial cell	chr11:10667679:G:C	cg16726577	-0.318488	0.000228402	-0.289294	1.76932e-06	0.866427	3.16003e-29
Colon	Epithelial cell	chr11:12085924:A:G	cg02861197	-0.134466	0.0118124	-0.135287	0.00399418	-0.396519	2.15612e-11
Colon	Epithelial cell	chr11:13120533:A:G	cg05162071	0.483347	9.23293e-10	0.608108	3.33807e-16	0.513626	7.26521e-12
Colon	Epithelial cell	chr11:16878556:T:G	cg27411072	-0.874553	1.69501e-25	-0.851852	3.04136e-29	-0.481529	4.53291e-11
Colon	Epithelial cell	chr11:19519975:G:C	cg24467428	0.884179	6.77207e-26	0.926694	1.90946e-32	0.50592	3.63915e-12
Colon	Epithelial cell	chr11:22671627:T:A	cg23941216	-0.0154688	0.879472	0.107453	0.228873	-0.637554	4.34094e-13
Colon	Epithelial cell	chr11:27282390:C:T	cg10370305	-0.0741292	0.399257	-0.0333777	0.655103	0.654445	4.16114e-14
Colon	Epithelial cell	chr11:45259102:G:A	cg24023723	0.71463	7.18968e-45	0.679614	3.26396e-55	0.302402	3.97174e-20
Colon	Epithelial cell	chr11:47203983:G:A	cg03339077	0.319837	2.32265e-09	0.287823	5.84927e-11	0.40867	1.41336e-17
Colon	Epithelial cell	chr11:60841939:T:C	cg18856296	-0.889588	8.90159e-48	-0.860864	1.55354e-57	-0.356661	4.55926e-18
Colon	Epithelial cell	chr11:64141188:G:A	cg20160996	0.577961	9.21223e-11	0.597158	1.10764e-14	0.62945	1.60097e-14
Colon	Epithelial cell	chr11:64223524:AC:A	cg06219103	-0.624834	1.58274e-11	-0.629013	9.12038e-15	-0.610825	4.5271e-13
Colon	Epithelial cell	chr11:64141188:G:A	cg06243084	0.645693	9.21344e-17	0.670251	3.51168e-22	0.447718	4.10154e-11
Colon	Epithelial cell	chr11:66459713:G:C	cg08894540	-0.386608	2.75172e-06	-0.415665	2.59823e-08	0.489519	6.97593e-11
Colon	Epithelial cell	chr11:67645535:T:C	cg23879118	-0.16896	0.000100411	-0.168334	1.18964e-05	-0.276437	1.52942e-11
Colon	Epithelial cell	chr11:67997192:G:C	cg15617336	0.851295	5.12877e-30	0.833139	8.46073e-35	0.387721	6.10979e-12
Colon	Epithelial cell	chr11:67971055:A:G	cg08480739	0.770528	7.69001e-25	0.76405	6.15722e-29	0.402805	6.00955e-11
Colon	Epithelial cell	chr11:70635983:T:C	cg00447817	-0.829752	4.25137e-25	-0.742462	2.91048e-28	-0.539182	7.84146e-17
Colon	Epithelial cell	chr11:72814066:C:A	cg17942689	-0.499765	1.77813e-09	-0.513145	4.89258e-12	-0.510018	2.39604e-11
Colon	Epithelial cell	chr11:75581556:A:G	cg09786210	0.00507991	0.945156	0.0169199	0.790879	-0.530428	2.06664e-12
Colon	Epithelial cell	chr11:76582026:C:T	cg10400081	-0.909365	3.04633e-31	-0.881509	3.49273e-36	-0.442539	7.44119e-13
Colon	Epithelial cell	chr11:94604054:C:T	cg01887834	-0.813347	3.12076e-43	-0.792834	1.23048e-48	-0.309962	5.45261e-12
Colon	Epithelial cell	chr11:99676624:C:T	cg22878054	0.497217	1.57288e-22	0.489206	1.21114e-29	0.354784	2.1328e-18
Colon	Epithelial cell	chr11:108242251:G:T	cg00001997	0.488406	2.39221e-18	0.561723	7.05438e-26	0.330988	2.89494e-11
Colon	Epithelial cell	chr11:108290475:T:A	cg01991180	0.437138	1.66483e-05	0.524837	1.13275e-08	0.652953	4.06908e-11
Colon	Epithelial cell	chr11:113388610:G:A	cg14159747	1.0334	4.92385e-36	1.03329	7.74931e-42	0.425563	4.48805e-11
Colon	Epithelial cell	chr11:116221535:TC:T	cg05624017	-1.28525	1.08907e-72	-1.24788	1.47724e-78	-0.304392	1.33517e-12
Colon	Epithelial cell	chr11:117583442:C:G	cg20191725	-1.03584	4.11462e-67	-1.05073	5.50977e-78	-0.275618	1.96296e-14
Colon	Epithelial cell	chr11:125089018:T:C	cg20872261	0.0519602	0.438161	0.115345	0.045456	-0.484368	9.72266e-14
Colon	Epithelial cell	chr11:125936055:G:A	cg22274375	0.699474	3.00974e-16	0.6239	8.95505e-19	0.584496	8.95057e-18
Colon	Epithelial cell	chr12:5309869:A:C	cg00655782	-0.69059	4.00222e-26	-0.688271	3.27464e-35	-0.471831	1.01764e-18
Colon	Epithelial cell	chr12:6198313:GCTCTGC:G	cg25926078	0.0702283	0.249833	0.0335951	0.516982	0.43136	2.48616e-13
Colon	Epithelial cell	chr12:27818751:G:C	cg23785280	0.543389	9.18401e-13	0.592811	3.58392e-17	0.49015	2.46519e-11
Colon	Epithelial cell	chr12:52470972:C:G	cg02068361	0.468382	3.07797e-13	0.462646	9.73545e-16	0.412012	2.5733e-11
Colon	Epithelial cell	chr12:52527431:C:T	cg16016366	-0.602666	8.185e-22	-0.661503	5.11447e-29	-0.369688	4.82877e-11
Colon	Epithelial cell	chr12:54182016:C:A	cg20336915	0.647014	2.02852e-19	0.623396	1.29507e-21	0.448968	4.02881e-11
Colon	Epithelial cell	chr12:54182016:C:A	cg08025038	0.948479	4.32728e-39	0.925945	5.4191e-45	0.433609	9.28373e-14
Colon	Epithelial cell	chr12:54182016:C:A	cg23094970	0.541336	2.0471e-25	0.529008	1.601e-30	0.354605	1.2551e-14
Colon	Epithelial cell	chr12:54182016:C:A	cg06851354	0.571571	8.06576e-44	0.566323	5.10156e-52	0.244634	6.74075e-15
Colon	Epithelial cell	chr12:54182016:C:A	cg04142929	1.12102	2.65685e-51	1.10864	9.20313e-57	0.363511	3.81023e-11
Colon	Epithelial cell	chr12:71135948:C:T	cg19045468	0.262732	0.000671208	0.278981	3.35921e-05	-0.503664	2.47407e-12
Colon	Epithelial cell	chr12:103784451:T:C	cg02344784	0.569531	3.75873e-23	0.537032	2.69639e-27	0.40547	1.88459e-15
Colon	Epithelial cell	chr12:106988017:AAAACTGGTT:A	cg21935516	0.519428	2.10838e-09	0.49078	4.39572e-12	0.610495	6.25673e-18
Colon	Epithelial cell	chr12:106988017:AAAACTGGTT:A	cg02274284	0.190186	0.0216277	0.15941	0.0108764	0.671644	1.75926e-22
Colon	Epithelial cell	chr12:115793884:G:A	cg13622788	0.498523	9.35368e-24	0.511241	2.50288e-29	-0.286537	2.64659e-11
Colon	Epithelial cell	chr12:119334937:A:C	cg20488281	0.382029	2.85712e-12	0.341122	4.40501e-13	0.412589	1.69776e-13
Colon	Epithelial cell	chr12:119333897:G:A	cg10573232	0.295027	7.59594e-08	0.252171	6.54577e-08	0.441919	2.2299e-14
Colon	Epithelial cell	chr12:119333897:G:A	cg02498063	0.229015	7.58159e-05	0.185626	0.000220806	0.444171	1.71734e-12
Colon	Epithelial cell	chr12:119333897:G:A	cg27435644	0.112189	0.0296228	0.0743106	0.100783	0.391436	8.96722e-12
Colon	Epithelial cell	chr12:130421934:C:T	cg12586756	-0.956265	3.12486e-52	-0.95741	2.06954e-65	-0.383143	4.3981e-19
Colon	Epithelial cell	chr12:130659462:C:CG	cg15658768	0.847513	6.38521e-30	0.869465	8.97711e-42	0.565321	1.15663e-19
Colon	Epithelial cell	chr13:25729581:G:A	cg21034619	-0.72507	7.58246e-11	-0.765274	2.8305e-14	-0.702969	2.47546e-11
Colon	Epithelial cell	chr13:29691877:T:C	cg10076702	-0.521239	2.60327e-28	-0.54053	2.97112e-35	-0.28503	1.14857e-11
Colon	Epithelial cell	chr13:30697672:A:G	cg19157500	-1.01913	4.81099e-37	-0.95405	2.41424e-47	-0.529564	6.51904e-23
Colon	Epithelial cell	chr13:36920497:C:T	cg06559111	0.438103	7.2748e-08	0.494894	1.53725e-12	0.617458	6.10731e-16
Colon	Epithelial cell	chr13:38948364:A:C	cg22659262	-1.15399	5.17593e-38	-1.10485	4.43295e-43	-0.486697	1.79826e-13
Colon	Epithelial cell	chr13:44231625:C:G	cg19190762	0.616183	2.05139e-31	0.623604	1.49803e-42	0.354257	7.66227e-19
Colon	Epithelial cell	chr13:52218961:A:G	cg05335186	0.379506	1.30275e-09	0.345715	5.96954e-10	0.379611	3.13745e-11
Colon	Epithelial cell	chr13:59440300:C:T	cg10963817	0.0139267	0.831616	-0.028023	0.613568	0.494994	2.34395e-14
Colon	Epithelial cell	chr13:61403216:A:G	cg12581627	-0.57902	2.60947e-32	-0.545828	3.62232e-36	-0.298892	1.11977e-13
Colon	Epithelial cell	chr13:111853388:C:T	cg04325130	-0.576033	7.13773e-13	-0.561081	1.40232e-15	-0.539769	2.07718e-13
Colon	Epithelial cell	chr13:112907038:C:T	cg26269162	-0.226505	0.000293949	-0.205736	0.000182108	-0.473726	6.0047e-12
Colon	Epithelial cell	chr13:112974334:G:A	cg18289306	0.446537	1.7805e-18	0.479285	2.39729e-24	0.339181	2.07602e-11
Colon	Epithelial cell	chr13:114059996:G:A	cg12938556	-0.438391	9.39936e-13	-0.406004	8.52704e-14	-0.395025	1.07922e-11
Colon	Epithelial cell	chr14:27672211:A:C	cg20971956	0.586234	2.50507e-10	0.555556	2.83791e-12	0.735191	2.53075e-14
Colon	Epithelial cell	chr14:43566116:T:C	cg02152620	1.03995	1.71387e-29	1.00578	1.68257e-33	0.48836	1.61393e-11
Colon	Epithelial cell	chr14:51140366:A:G	cg23942311	1.12988	7.87753e-54	1.10432	3.43979e-60	0.324921	2.00513e-12
Colon	Epithelial cell	chr14:51724763:T:C	cg22520374	-0.792082	1.14031e-28	-0.772384	2.22611e-34	-0.456798	3.44242e-14
Colon	Epithelial cell	chr14:68386866:G:A	cg18593517	0.775864	1.29195e-26	0.730993	5.76998e-32	0.482896	4.5898e-17
Colon	Epithelial cell	chr14:70301336:A:AAG	cg04120969	-0.519454	1.10115e-10	-0.529404	2.08417e-13	-0.517546	7.12584e-12
Colon	Epithelial cell	chr14:70374896:A:T	cg25576086	-0.55729	9.99344e-14	-0.567664	3.98873e-17	-0.460572	1.07715e-11
Colon	Epithelial cell	chr14:76827925:AC:A	cg13001075	0.71837	1.48988e-21	0.653769	1.24686e-24	0.579112	5.70133e-17
Colon	Epithelial cell	chr14:76811687:C:T	cg19862877	0.667702	1.94904e-12	0.580276	8.129e-13	0.725033	6.56112e-15
Colon	Epithelial cell	chr14:77051443:G:A	cg12488301	0.639782	1.66294e-26	0.593401	1.10133e-29	0.403517	1.55208e-14
Colon	Epithelial cell	chr14:77604117:CT:C	cg20434272	1.42548	5.78526e-49	1.45315	1.10029e-59	0.562843	8.15366e-15
Colon	Epithelial cell	chr14:85527724:A:T	cg01537995	-0.417077	1.41573e-21	-0.400186	1.26104e-23	-0.265461	4.6356e-11
Colon	Epithelial cell	chr14:85527724:A:T	cg14125604	-0.491423	4.37716e-24	-0.475484	7.65385e-27	-0.296016	1.45698e-11
Colon	Epithelial cell	chr14:91095473:G:A	cg27654152	-0.665612	1.82538e-23	-0.623819	5.34056e-34	-0.627771	4.16826e-27
Colon	Epithelial cell	chr14:91090233:C:G	cg10243679	-0.634993	6.74491e-11	-0.579634	8.68203e-13	-0.822281	1.5384e-16
Colon	Epithelial cell	chr14:91455240:C:CA	cg16433844	-0.920074	5.04803e-33	-0.901897	9.05149e-39	-0.468545	2.808e-13
Colon	Epithelial cell	chr14:92724668:A:G	cg21705170	0.619478	9.88155e-20	0.58401	7.92155e-22	0.405147	1.25945e-11
Colon	Epithelial cell	chr14:92724668:A:G	cg14530462	0.469212	1.77656e-19	0.439572	3.5651e-22	0.336688	9.43497e-14
Colon	Epithelial cell	chr14:93814287:G:T	cg05319680	0.780104	8.98487e-21	0.716475	9.35247e-24	0.480627	6.7557e-16
Colon	Epithelial cell	chr14:96250799:A:G	cg18360492	-0.418814	8.2336e-22	-0.407245	2.33869e-25	-0.263704	3.61779e-12
Colon	Epithelial cell	chr14:104093169:C:T	cg23794278	0.824626	9.16724e-30	0.805484	6.12404e-34	0.372999	1.00017e-11
Colon	Epithelial cell	chr14:104093169:C:T	cg07150062	0.833428	7.42539e-30	0.809565	1.53918e-33	0.359979	7.30702e-11
Colon	Epithelial cell	chr15:32899146:AAAAC:A	cg14111612	0.206244	0.0031064	0.187533	0.00102302	0.580848	4.14697e-17
Colon	Epithelial cell	chr15:36583782:T:C	cg18558073	1.09569	6.86638e-39	1.07955	1.17273e-45	0.52757	1.16138e-13
Colon	Epithelial cell	chr15:40308855:GCTCTCCT:G	cg05884705	0.800136	4.36806e-22	0.677079	3.16726e-23	0.546724	8.40558e-19
Colon	Epithelial cell	chr15:40308855:GCTCTCCT:G	cg25210134	0.743159	2.69203e-20	0.638005	1.58356e-19	0.452876	6.29866e-13
Colon	Epithelial cell	chr15:40308855:GCTCTCCT:G	cg05547778	0.762419	7.55697e-29	0.652992	6.35617e-35	0.490278	3.49495e-26
Colon	Epithelial cell	chr15:40308855:GCTCTCCT:G	cg14076977	0.777263	2.29121e-30	0.67022	1.02509e-36	0.478531	7.87653e-26
Colon	Epithelial cell	chr15:40308855:GCTCTCCT:G	cg21931938	0.725348	8.10523e-31	0.62833	1.07632e-35	0.418888	9.67677e-23
Colon	Epithelial cell	chr15:40592238:T:C	cg05111383	-0.826176	5.05629e-34	-0.810633	5.08167e-41	-0.442417	5.62864e-15
Colon	Epithelial cell	chr15:42364741:C:T	cg18814616	1.39666	1.26984e-53	1.35688	1.14892e-59	0.365417	7.63836e-13
Colon	Epithelial cell	chr15:61716265:T:C	cg21338566	0.510873	2.76103e-13	0.485669	7.42385e-15	-0.481688	6.38825e-12
Colon	Epithelial cell	chr15:63036099:A:G	cg26524064	-0.673474	3.21855e-19	-0.695647	2.49281e-24	-0.471639	2.36601e-11
Colon	Epithelial cell	chr15:66716105:A:G	cg04093349	-0.226666	0.0108129	-0.188238	0.0149239	-0.639189	2.76973e-12
Colon	Epithelial cell	chr15:67961613:C:T	cg04875821	0.528048	9.73378e-15	0.598632	1.3087e-21	-0.426853	1.09825e-11
Colon	Epithelial cell	chr15:68230512:G:A	cg20716080	-0.043246	0.54855	-0.0704114	0.267173	0.456977	1.50973e-11
Colon	Epithelial cell	chr15:68234017:A:C	cg22576950	0.184908	0.0013603	0.15659	0.000369681	0.484211	2.73904e-22
Colon	Epithelial cell	chr15:72186837:C:G	cg21214455	0.599926	2.24576e-17	0.614927	1.5279e-22	0.418201	1.96717e-11
Colon	Epithelial cell	chr15:74220950:A:G	cg11787522	-0.733913	2.17941e-12	-0.800306	3.72406e-17	-0.617767	8.97398e-12
Colon	Epithelial cell	chr15:76236490:C:T	cg03037974	1.03363	7.85009e-35	1.01197	9.26177e-40	0.437833	7.57712e-12
Colon	Epithelial cell	chr15:77590075:A:G	cg17826486	0.547845	1.45401e-15	0.594012	1.38876e-20	0.444431	1.19185e-11
Colon	Epithelial cell	chr15:77908252:G:A	cg21592613	0.262026	0.000129163	0.192521	0.00134328	0.399709	3.51462e-11
Colon	Epithelial cell	chr15:78153756:T:C	cg23020028	-0.321555	1.03001e-05	-0.258379	1.5759e-06	-0.606833	3.60343e-24
Colon	Epithelial cell	chr15:82994253:A:G	cg08397204	-0.877612	9.30432e-29	-0.854775	5.34232e-32	-0.433967	1.06295e-10
Colon	Epithelial cell	chr15:88617428:G:C	cg26402218	-0.668691	3.84761e-16	-0.621197	1.71547e-17	-0.48808	8.12389e-12
Colon	Epithelial cell	chr15:88617839:G:GA	cg20808613	-0.581245	2.20542e-10	-0.459947	1.83637e-08	-0.496684	1.02611e-11
Colon	Epithelial cell	chr15:90106315:AGTGCAGTG:A	cg14940396	0.630671	8.45167e-15	0.592547	4.37804e-18	0.586525	1.34274e-16
Colon	Epithelial cell	chr15:91294509:ATT:A	cg24516362	0.250616	2.59663e-06	0.287728	3.35103e-09	0.325514	4.68736e-11
Colon	Epithelial cell	chr15:93091704:C:T	cg16035236	-0.269969	1.21956e-11	-0.2817	2.95961e-16	-0.291498	2.70677e-15
Colon	Epithelial cell	chr16:937112:C:T	cg00523434	0.5222	1.12617e-17	0.504111	4.79851e-21	0.394397	1.58178e-13
Colon	Epithelial cell	chr16:4957055:T:A	cg06510647	-1.06258	1.41005e-29	-0.985851	1.2628e-31	-0.482868	4.89976e-12
Colon	Epithelial cell	chr16:6339702:G:A	cg23115560	0.837154	1.68585e-24	0.836006	9.55672e-31	0.502108	5.20187e-14
Colon	Epithelial cell	chr16:11862261:T:A	cg00255752	0.673786	1.0143e-18	0.655519	1.07174e-21	0.441479	1.63755e-11
Colon	Epithelial cell	chr16:12573509:G:A	cg01075459	0.0433923	0.681376	-0.0153461	0.855721	-0.958599	3.47106e-19
Colon	Epithelial cell	chr16:23764896:T:G	cg01776298	0.730217	3.61627e-18	0.706075	2.90791e-23	0.617386	1.92811e-17
Colon	Epithelial cell	chr16:49652647:A:C	cg06263178	0.896894	6.8165e-34	0.922409	1.38594e-40	0.437492	1.9627e-11
Colon	Epithelial cell	chr16:56639236:A:G	cg06343774	-0.923219	3.57131e-30	-0.886486	1.606e-34	-0.434066	1.88456e-13
Colon	Epithelial cell	chr16:66129070:A:T	cg03825862	0.225414	2.47661e-06	0.186937	4.5657e-06	0.35461	3.12847e-14
Colon	Epithelial cell	chr16:66408503:C:T	cg27326306	-0.745051	3.5404e-35	-0.695485	1.71868e-43	-0.445825	7.05633e-21
Colon	Epithelial cell	chr16:66408503:C:T	cg10879877	-1.1484	3.07133e-51	-1.10099	7.05865e-58	-0.427186	9.01954e-15
Colon	Epithelial cell	chr16:67955620:T:C	cg25738319	-0.861484	1.19148e-26	-0.833528	1.18656e-32	-0.414747	6.92698e-16
Colon	Epithelial cell	chr16:78285737:G:A	cg15896717	-0.474683	3.41898e-17	-0.47862	1.3261e-21	-0.358593	5.64745e-13
Colon	Epithelial cell	chr16:80319372:C:A	cg14172705	-0.433999	3.41275e-17	-0.423088	2.68344e-21	-0.313385	2.13135e-14
Colon	Epithelial cell	chr16:85087397:A:G	cg10013998	0.0992655	0.0247729	0.0672452	0.0773169	-0.329863	1.38299e-12
Colon	Epithelial cell	chr16:86047864:A:C	cg24933364	-0.284165	3.87487e-06	-0.333087	9.80635e-10	-0.423816	8.43494e-13
Colon	Epithelial cell	chr16:87198777:C:T	cg26651933	0.862486	2.81435e-23	0.843231	1.30248e-29	0.650587	6.4815e-17
Colon	Epithelial cell	chr16:87198777:C:T	cg12547847	0.928354	1.66992e-29	0.91091	9.45199e-36	0.555114	8.30761e-15
Colon	Epithelial cell	chr16:88073008:C:T	cg17633681	0.781017	2.8432e-30	0.733102	3.31801e-33	0.368353	1.17116e-11
Colon	Epithelial cell	chr16:88691431:C:T	cg09381666	1.27127	7.75179e-65	1.26483	3.86007e-76	0.364488	3.57341e-16
Colon	Epithelial cell	chr16:89158755:G:A	cg04694209	0.381954	1.15842e-16	0.343007	3.65345e-17	0.277667	3.29269e-12
Colon	Epithelial cell	chr17:1005655:AAG:A	cg05707655	-0.756684	1.21419e-25	-0.752945	7.72658e-31	-0.456931	3.53749e-13
Colon	Epithelial cell	chr17:1005655:AAG:A	cg01841306	-0.602757	1.83496e-25	-0.595272	1.71041e-30	-0.371846	1.36591e-13
Colon	Epithelial cell	chr17:1005655:AAG:A	cg09639964	-0.698263	1.91105e-18	-0.691414	1.9224e-23	-0.576345	1.09979e-15
Colon	Epithelial cell	chr17:1005655:AAG:A	cg10230533	-0.915211	5.37443e-31	-0.92626	3.43251e-37	-0.437511	2.86069e-11
Colon	Epithelial cell	chr17:1019470:TCTGCTGCAGGTGTGGCCCTGGTGC:T	cg16096942	-0.274413	3.72131e-05	-0.245968	1.31892e-05	0.511393	2.75226e-14
Colon	Epithelial cell	chr17:1762803:A:G	cg09128350	-0.62979	6.81387e-14	-0.577302	3.03215e-18	-0.693946	2.54285e-22
Colon	Epithelial cell	chr17:1995506:C:A	cg09218348	0.265369	4.49903e-10	0.300314	1.49198e-15	0.306063	2.10538e-13
Colon	Epithelial cell	chr17:2123123:GA:G	cg15816464	0.913358	4.50757e-28	0.97077	2.3211e-35	0.410029	6.56828e-11
Colon	Epithelial cell	chr17:2364845:G:C	cg22235600	0.56993	8.93898e-21	0.540031	2.1712e-24	0.367038	1.08713e-14
Colon	Epithelial cell	chr17:3557863:C:T	cg13633262	1.14734	1.17775e-48	1.06852	4.44138e-57	0.417572	4.34348e-20
Colon	Epithelial cell	chr17:3987135:A:G	cg09597638	0.834956	2.23933e-20	0.797055	5.39986e-24	0.607652	5.92499e-15
Colon	Epithelial cell	chr17:3987135:A:G	cg11204139	0.906257	1.92118e-21	0.884507	3.10369e-26	0.633008	5.51673e-15
Colon	Epithelial cell	chr17:4011857:G:C	cg09695851	0.952653	5.11121e-25	0.900666	8.55124e-29	0.595311	8.50634e-15
Colon	Epithelial cell	chr17:17435562:C:A	cg16881960	-0.726384	9.35892e-27	-0.703558	3.9493e-31	-0.386169	4.59339e-13
Colon	Epithelial cell	chr17:19672765:C:T	cg15686419	0.812377	1.02391e-26	0.770496	3.89915e-33	0.491402	2.39205e-18
Colon	Epithelial cell	chr17:20108248:C:A	cg20827946	-1.15559	3.35995e-68	-1.14637	8.99504e-78	-0.259461	1.06996e-12
Colon	Epithelial cell	chr17:28856086:G:A	cg16670446	-0.653781	7.00918e-24	-0.638928	4.77217e-28	-0.368208	3.24712e-13
Colon	Epithelial cell	chr17:32519606:C:G	cg12855166	-0.885035	1.20627e-34	-0.858173	9.22152e-39	-0.390816	4.08739e-11
Colon	Epithelial cell	chr17:32519606:C:G	cg21839984	-0.480476	6.48138e-11	-0.428443	4.76861e-13	-0.622335	1.29951e-19
Colon	Epithelial cell	chr17:35254195:T:G	cg14806529	0.672283	1.10604e-21	0.629245	1.93886e-25	0.488907	8.15717e-16
Colon	Epithelial cell	chr17:36851549:G:T	cg13102742	-1.27823	2.13211e-79	-1.25835	4.59743e-89	0.276764	3.40513e-14
Colon	Epithelial cell	chr17:43779254:A:G	cg14832023	0.431535	5.14843e-09	0.47842	1.14076e-13	0.613721	5.6946e-15
Colon	Epithelial cell	chr17:45111523:C:G	cg23165643	-0.840617	2.07619e-31	-0.854154	9.61793e-41	-0.474686	2.09973e-16
Colon	Epithelial cell	chr17:46236156:G:T	cg17911788	-0.879484	2.86722e-46	-0.891007	3.8963e-56	-0.383441	6.92035e-15
Colon	Epithelial cell	chr17:46278236:A:G	cg05159804	-1.06027	4.48001e-49	-1.07597	2.06946e-56	-0.367044	5.18871e-11
Colon	Epithelial cell	chr17:47648565:T:A	cg19650738	-0.849257	2.83545e-27	-0.822088	9.01464e-31	-0.452826	1.19015e-11
Colon	Epithelial cell	chr17:52176967:A:G	cg09688374	0.567105	3.4297e-16	0.605852	3.38376e-22	0.507673	1.96539e-13
Colon	Epithelial cell	chr17:69961571:G:C	cg13433125	-0.216885	0.00627766	-0.181188	0.00841096	0.525387	8.09902e-13
Colon	Epithelial cell	chr17:69961571:G:C	cg19049502	0.486221	3.48304e-13	0.514789	7.02163e-18	0.417362	4.18867e-13
Colon	Epithelial cell	chr17:73065795:T:C	cg18669210	0.501141	1.24946e-14	0.514386	3.92615e-19	0.385769	3.58362e-12
Colon	Epithelial cell	chr17:74245053:A:G	cg08594554	-0.420758	9.42285e-07	-0.400718	1.27775e-07	-0.521912	1.16511e-11
Colon	Epithelial cell	chr17:74236779:A:G	cg11763830	-0.497541	1.82967e-12	-0.495881	2.79921e-15	-0.431283	2.52629e-12
Colon	Epithelial cell	chr17:74244542:C:T	cg04299621	-0.705204	1.82482e-15	-0.674046	3.39693e-18	-0.565855	1.91618e-13
Colon	Epithelial cell	chr17:81076348:C:T	cg12324119	0.419617	3.23324e-18	0.413986	1.762e-21	0.283467	1.18873e-11
Colon	Epithelial cell	chr17:82187415:A:T	cg23522485	0.797219	4.18398e-30	0.760068	3.22149e-35	0.431565	5.29512e-15
Colon	Epithelial cell	chr17:82596100:A:AGGCCACACCTGC	cg05580415	-0.482653	3.02791e-16	-0.424058	1.87332e-18	-0.416756	8.10587e-19
Colon	Epithelial cell	chr17:82596100:A:AGGCCACACCTGC	cg16375265	-0.935413	7.85445e-33	-0.872257	3.23824e-37	-0.450889	1.24704e-15
Colon	Epithelial cell	chr17:82596100:A:AGGCCACACCTGC	cg01484899	-1.01713	7.31503e-39	-0.958004	9.59148e-42	-0.362897	2.7951e-11
Colon	Epithelial cell	chr17:82596100:A:AGGCCACACCTGC	cg21909206	-1.00986	4.07902e-29	-0.949242	1.45563e-32	-0.506432	5.89056e-14
Colon	Epithelial cell	chr17:82849594:G:C	cg23510258	-0.269691	1.93033e-08	-0.262726	4.09757e-10	-0.302181	2.96186e-12
Colon	Epithelial cell	chr18:13240285:C:T	cg08814944	0.57908	2.79472e-26	0.550838	5.30885e-30	0.323945	3.59261e-14
Colon	Epithelial cell	chr18:23331390:G:GC	cg07082130	-0.811334	2.49974e-10	-0.841564	1.50622e-13	-0.920177	2.08117e-12
Colon	Epithelial cell	chr18:24552431:G:A	cg27033006	0.611283	1.89602e-12	0.520015	9.35393e-13	0.605879	8.09125e-16
Colon	Epithelial cell	chr18:25828206:C:A	cg13809116	0.41029	1.3692e-06	0.436592	5.28019e-09	0.539902	4.92432e-11
Colon	Epithelial cell	chr18:49815168:C:T	cg09091540	0.283298	1.6181e-06	0.276759	1.77514e-08	0.417635	5.79992e-16
Colon	Epithelial cell	chr18:73626962:T:C	cg10858553	0.673165	1.60367e-12	0.715878	1.65601e-16	0.639054	1.97888e-11
Colon	Epithelial cell	chr19:457344:A:G	cg02360676	-0.809632	5.65974e-15	-0.853631	1.12182e-19	-0.696915	3.00353e-12
Colon	Epithelial cell	chr19:4001201:C:T	cg17628715	-1.56232	1.07095e-32	-1.46897	6.53779e-37	-0.703378	2.04219e-14
Colon	Epithelial cell	chr19:7224420:G:A	cg02992714	-0.603195	4.07512e-26	-0.613169	8.9178e-36	-0.374554	1.19889e-18
Colon	Epithelial cell	chr19:7224420:G:A	cg09779027	-0.547239	6.9378e-34	-0.556219	1.22459e-50	-0.321478	1.94136e-26
Colon	Epithelial cell	chr19:7224420:G:A	cg00428638	-0.53368	1.82207e-31	-0.543526	5.22648e-50	-0.346384	1.13274e-29
Colon	Epithelial cell	chr19:7825495:G:A	cg26014689	-1.05827	1.42407e-40	-1.05267	8.54032e-50	-0.470715	3.32855e-16
Colon	Epithelial cell	chr19:12766150:G:C	cg23899408	1.18778	1.73952e-87	1.18618	6.52279e-95	0.202927	1.84116e-11
Colon	Epithelial cell	chr19:15934939:G:A	cg18602913	-0.684586	2.27463e-36	-0.659102	5.71964e-41	-0.318597	2.46302e-11
Colon	Epithelial cell	chr19:17108295:G:A	cg08925954	0.659862	8.01545e-28	0.655422	1.62011e-35	0.378328	2.54497e-15
Colon	Epithelial cell	chr19:21589486:C:T	cg13131483	0.565738	2.16749e-19	0.50185	4.58924e-21	0.433678	6.88912e-16
Colon	Epithelial cell	chr19:30105934:T:C	cg13534906	0.417421	1.71274e-13	0.415853	4.57674e-18	0.398808	3.01221e-16
Colon	Epithelial cell	chr19:35379223:G:C	cg02363750	-0.753178	1.29771e-34	-0.704181	9.97328e-37	-0.355429	6.87827e-13
Colon	Epithelial cell	chr19:39098549:C:T	cg08062233	0.708679	7.29031e-23	0.715668	5.18876e-31	0.515763	1.03741e-17
Colon	Epithelial cell	chr19:40687675:A:G	cg02757488	1.03944	4.35395e-48	0.979195	7.16093e-57	0.463701	1.27755e-18
Colon	Epithelial cell	chr19:41403441:A:G	cg19380072	0.985906	8.9909e-34	1.02454	2.4359e-41	0.498428	1.16145e-11
Colon	Epithelial cell	chr19:41404712:G:A	cg17762391	0.554147	4.82753e-18	0.592194	3.14585e-24	0.455549	1.37204e-12
Colon	Epithelial cell	chr19:41403441:A:G	cg12853145	0.820143	4.63642e-25	0.865903	4.96451e-34	0.583796	5.09504e-15
Colon	Epithelial cell	chr19:42153976:T:C	cg13610422	0.850675	1.13329e-27	0.759681	3.85783e-28	0.439728	6.96175e-13
Colon	Epithelial cell	chr19:47633687:A:G	cg15333037	0.606003	7.10644e-19	0.61052	1.9997e-23	0.475282	8.3147e-13
Colon	Epithelial cell	chr19:56320139:G:A	cg11044983	0.588716	1.61734e-21	0.617551	1.19414e-30	0.476141	1.25622e-18
Colon	Epithelial cell	chr20:400547:T:C	cg11748909	0.930265	2.87931e-18	0.886693	6.98759e-21	0.724231	1.94188e-12
Colon	Epithelial cell	chr20:1942625:C:A	cg16463063	-0.494174	3.03611e-10	-0.467908	1.39847e-11	-0.481527	3.48005e-12
Colon	Epithelial cell	chr20:4634024:G:T	cg26611353	0.537314	7.18483e-20	0.482136	7.60967e-21	0.364894	2.88029e-12
Colon	Epithelial cell	chr20:5058359:G:A	cg01094920	-0.488635	3.35882e-12	-0.524514	1.98181e-16	-0.480017	2.92998e-11
Colon	Epithelial cell	chr20:13287012:G:T	cg09495909	0.502202	9.3618e-08	0.499613	2.46623e-10	0.715914	2.48245e-16
Colon	Epithelial cell	chr20:16475443:A:G	cg19090398	1.04051	4.20941e-47	1.04608	2.26617e-54	0.340154	7.54965e-12
Colon	Epithelial cell	chr20:23452965:T:C	cg11657817	1.1148	8.16421e-58	1.07602	6.54133e-63	0.264701	4.95333e-11
Colon	Epithelial cell	chr20:24440534:G:A	cg26517054	-0.564765	2.01391e-14	-0.545155	1.18872e-16	-0.442424	8.39881e-12
Colon	Epithelial cell	chr20:25332462:G:GACATCTAC	cg20616937	0.866035	2.30207e-36	0.861867	4.65463e-42	0.373137	9.7774e-12
Colon	Epithelial cell	chr20:37331411:T:C	cg16187739	0.346808	6.43849e-08	0.294592	2.51238e-07	-0.393167	5.22937e-11
Colon	Epithelial cell	chr20:37992450:T:C	cg22625504	0.63567	1.11744e-20	0.645251	5.50658e-30	0.53997	9.72607e-21
Colon	Epithelial cell	chr20:37992450:T:C	cg25241888	0.541083	9.78686e-13	0.54984	2.28047e-16	0.516625	4.98155e-13
Colon	Epithelial cell	chr20:43904984:T:C	cg11160911	-1.09729	7.83116e-50	-1.07093	1.34727e-55	-0.360136	2.88831e-11
Colon	Epithelial cell	chr20:45274306:T:A	cg27176129	-0.238337	4.00169e-05	-0.202666	6.52356e-05	0.407433	8.15607e-12
Colon	Epithelial cell	chr20:45308350:A:AGGGGAAGT	cg04305670	0.403022	3.09699e-10	0.436346	1.33458e-14	0.467539	1.48966e-13
Colon	Epithelial cell	chr20:45427440:C:CGTG	cg21394589	-0.0452425	0.41293	0.00472814	0.924328	-0.375323	5.94641e-11
Colon	Epithelial cell	chr20:46965656:T:G	cg12172022	-1.22015	3.61016e-41	-1.24008	8.29132e-49	-0.493178	2.54886e-12
Colon	Epithelial cell	chr20:50644261:T:C	cg10580960	0.942908	5.53792e-32	0.93438	8.61443e-42	0.542532	3.43439e-18
Colon	Epithelial cell	chr20:50824544:G:C	cg15159602	0.641134	2.70801e-21	0.581123	4.52925e-22	0.391231	3.22564e-12
Colon	Epithelial cell	chr20:62601399:C:T	cg04815707	-0.494359	9.44397e-14	-0.575776	7.58245e-23	-0.479244	2.71176e-16
Colon	Epithelial cell	chr20:64064525:C:A	cg10512781	0.451757	8.16287e-25	0.410191	4.34029e-25	0.225085	5.30285e-11
Colon	Epithelial cell	chr21:34203496:A:G	cg19894312	-0.00370119	0.946049	-0.0371545	0.360496	-0.487451	8.93521e-24
Colon	Epithelial cell	chr21:35749429:A:T	cg17829193	0.923935	2.13663e-41	0.902711	5.73278e-48	0.360724	8.45181e-14
Colon	Epithelial cell	chr21:35749429:A:T	cg03546627	0.811716	3.08325e-34	0.78996	5.13265e-39	0.349087	3.17438e-12
Colon	Epithelial cell	chr21:38795138:T:G	cg25099965	0.940174	3.07294e-31	0.894048	6.85386e-36	0.438786	1.44336e-14
Colon	Epithelial cell	chr21:42584143:T:C	cg04000056	-0.975019	1.02639e-43	-0.972686	6.9867e-50	-0.339571	3.42323e-11
Colon	Epithelial cell	chr21:42616819:C:T	cg16544704	-0.92276	9.9234e-25	-0.842475	2.4793e-29	-0.666797	1.05396e-18
Colon	Epithelial cell	chr21:42616819:C:T	cg01074392	-0.927847	1.62732e-19	-0.847355	4.92052e-21	-0.677581	2.98478e-13
Colon	Epithelial cell	chr21:42616819:C:T	cg03885509	-1.13369	1.0655e-34	-1.06386	1.85893e-39	-0.579163	3.25278e-15
Colon	Epithelial cell	chr21:42616819:C:T	cg14719752	-1.12113	5.09808e-41	-1.06285	3.13011e-46	-0.460637	2.90545e-13
Colon	Epithelial cell	chr22:24599077:G:A	cg15363607	-0.63124	5.16872e-12	-0.552898	1.95042e-12	-0.63348	2.5939e-14
Colon	Epithelial cell	chr22:42901674:C:T	cg00524659	-0.476498	1.09784e-16	-0.424871	3.23433e-17	-0.378685	7.67406e-13
Colon	Epithelial cell	chr22:42883276:A:G	cg05296841	-1.05308	8.62044e-48	-0.99424	1.27453e-58	-0.470083	1.85601e-21
Colon	Epithelial cell	chr22:50402144:G:A	cg04449224	-0.386354	1.39637e-19	-0.387321	4.81475e-25	-0.265504	9.31659e-15
Colon	Lymphocyte	chr1:25523451:C:T	cg19815009	-0.991981	2.22696e-34	-0.996746	1.80584e-40	0.441196	1.04705e-11
Colon	Lymphocyte	chr1:84998055:C:A	cg02621376	0.805886	4.73512e-39	0.778204	1.37762e-45	-0.341599	1.83138e-15
Colon	Lymphocyte	chr1:111566045:A:C	cg24504171	0.335834	1.37779e-08	0.333724	2.85283e-10	-0.340447	1.1489e-11
Colon	Lymphocyte	chr1:205258632:G:C	cg16530596	-0.902058	5.64534e-43	-0.896552	2.51267e-53	0.343028	1.98792e-15
Colon	Lymphocyte	chr2:8571639:T:C	cg23541422	-0.764696	2.92987e-23	-0.742798	2.59791e-28	0.506374	1.55355e-13
Colon	Lymphocyte	chr2:201160898:A:G	cg16040230	0.437818	2.50619e-19	0.402971	1.63108e-20	-0.267178	9.07011e-12
Colon	Lymphocyte	chr2:237592733:G:C	cg10458446	0.4883	4.27557e-22	0.482219	1.3507e-26	-0.263248	5.94252e-13
Colon	Lymphocyte	chr3:17647495:TAAGAA:T	cg20981856	0.477044	1.08171e-10	0.457691	3.98442e-12	-0.440756	5.38932e-11
Colon	Lymphocyte	chr3:49853180:C:T	cg02037349	-0.797214	4.32282e-30	-0.808249	5.5067e-36	0.364437	1.52791e-11
Colon	Lymphocyte	chr3:69720212:A:T	cg24600372	0.186777	0.000381105	0.197152	2.30216e-05	-0.291904	1.4246e-11
Colon	Lymphocyte	chr3:190323165:G:T	cg05867326	0.816686	4.77291e-30	0.83492	7.54784e-37	-0.376667	1.6878e-11
Colon	Lymphocyte	chr4:8259085:C:G	cg26118221	-0.40539	3.38128e-10	-0.346343	1.31211e-09	0.34882	1.1415e-11
Colon	Lymphocyte	chr4:8259085:C:G	cg19241973	-0.343979	1.05392e-07	-0.282803	7.33153e-07	0.354887	1.22674e-11
Colon	Lymphocyte	chr5:68973751:A:G	cg15524731	-0.475975	1.91792e-20	-0.478948	5.38954e-26	0.299489	1.69584e-13
Colon	Lymphocyte	chr5:73118856:G:GTAATAAA	cg14617041	-0.899045	1.36039e-25	-0.873123	8.58827e-30	0.520026	6.0473e-13
Colon	Lymphocyte	chr5:73118856:G:GTAATAAA	cg15518950	-0.806845	2.65405e-27	-0.787189	3.3689e-31	0.425013	9.27711e-12
Colon	Lymphocyte	chr6:1252439:T:C	cg07838381	-0.567443	5.89577e-21	-0.556555	9.52349e-25	0.328201	7.76529e-12
Colon	Lymphocyte	chr6:6851305:A:G	cg22775635	0.897194	4.02025e-45	0.877198	2.80731e-51	-0.307215	1.02626e-12
Colon	Lymphocyte	chr6:28107147:C:A	cg02683197	0.778507	1.93169e-23	0.789863	1.09076e-29	-0.538779	1.18593e-13
Colon	Lymphocyte	chr6:28107147:C:A	cg06470822	0.803355	6.73607e-20	0.81525	1.10154e-24	-0.580453	7.70055e-12
Colon	Lymphocyte	chr6:28192182:T:C	cg03111404	0.76328	4.86506e-20	0.786389	1.91834e-27	-0.655997	9.60018e-16
Colon	Lymphocyte	chr6:28756302:T:G	cg02196503	0.46269	1.79393e-13	0.43491	4.92555e-15	-0.383858	1.18035e-11
Colon	Lymphocyte	chr6:30049033:A:T	cg23313031	0.958777	2.53718e-18	0.958419	6.41186e-23	-0.665994	4.4696e-13
Colon	Lymphocyte	chr6:29941937:T:C	cg19448822	0.928462	7.64141e-16	0.875205	3.24269e-19	-0.731065	1.13542e-14
Colon	Lymphocyte	chr6:36388225:A:G	cg14159011	-1.07343	1.75363e-55	-1.0414	1.46455e-63	0.310069	4.30379e-15
Colon	Lymphocyte	chr6:109304593:T:C	cg12709746	0.806065	1.36019e-19	0.78233	2.02297e-22	-0.45122	9.66478e-11
Colon	Lymphocyte	chr6:167280488:A:C	cg05254236	0.729731	6.95176e-22	0.743695	3.12189e-27	-0.398615	1.39531e-11
Colon	Lymphocyte	chr7:3181776:G:C	cg18002126	0.622582	5.05776e-29	0.58478	2.81845e-31	-0.289344	2.43286e-11
Colon	Lymphocyte	chr7:75676776:CA:C	cg22535104	0.546233	5.77248e-17	0.542324	3.22733e-20	-0.35098	2.02456e-11
Colon	Lymphocyte	chr7:101562422:G:A	cg20364044	0.704556	2.36548e-26	0.724069	1.02228e-33	-0.38524	6.55668e-14
Colon	Lymphocyte	chr7:150340838:C:T	cg17279839	1.06754	9.1668e-47	1.06467	4.67336e-53	-0.36981	5.57661e-11
Colon	Lymphocyte	chr7:155962079:T:C	cg11885975	-0.955856	2.4652e-29	-0.956505	1.82921e-34	0.431597	2.33047e-11
Colon	Lymphocyte	chr8:11862718:G:C	cg01002857	0.848386	3.92901e-36	0.85451	7.31201e-44	-0.354159	1.24116e-13
Colon	Lymphocyte	chr8:11862718:G:C	cg09087222	0.917408	4.48291e-33	0.923765	7.26495e-42	-0.435743	1.36136e-15
Colon	Lymphocyte	chr8:22060578:A:C	cg04662594	0.793558	1.26663e-12	0.810666	1.21458e-15	-0.552955	6.4424e-11
Colon	Lymphocyte	chr8:80095704:G:T	cg10933148	0.660106	3.27493e-27	0.662202	6.6184e-33	-0.319639	4.84966e-12
Colon	Lymphocyte	chr8:119206063:C:T	cg27215916	-0.868307	3.13364e-30	-0.895849	3.47286e-37	0.426859	7.69655e-12
Colon	Lymphocyte	chr8:129241197:G:C	cg16675872	0.638302	1.37265e-11	0.550394	1.70154e-11	-0.590007	1.84943e-13
Colon	Lymphocyte	chr9:38089972:C:T	cg04327959	0.499172	1.63629e-14	0.517039	6.85841e-19	-0.438969	1.87085e-12
Colon	Lymphocyte	chr9:95772090:T:C	cg22975387	-0.148202	0.0253145	-0.133304	0.0203401	-0.441053	9.45582e-12
Colon	Lymphocyte	chr9:95782396:C:T	cg24007924	-0.0875265	0.116907	-0.107286	0.024362	-0.395732	1.21242e-13
Colon	Lymphocyte	chr9:107918263:C:T	cg17222014	-0.464388	7.38819e-15	-0.422971	1.9708e-15	0.31603	2.09063e-11
Colon	Lymphocyte	chr10:32352016:A:G	cg09075096	-0.486494	2.11442e-24	-0.508527	4.27715e-31	0.263613	2.0008e-12
Colon	Lymphocyte	chr10:34966173:A:G	cg08583969	-0.687523	1.53145e-38	-0.657215	5.97197e-43	0.243541	1.94619e-11
Colon	Lymphocyte	chr10:49144675:A:T	cg12771178	0.985911	1.9824e-43	0.908199	3.81344e-44	-0.304643	1.1017e-11
Colon	Lymphocyte	chr10:59678952:T:C	cg22380090	-0.621746	1.7019e-30	-0.625467	4.09514e-37	0.295436	3.49713e-13
Colon	Lymphocyte	chr10:71514139:C:T	cg11932029	0.852416	1.03423e-33	0.848274	2.23405e-40	-0.384979	7.86671e-14
Colon	Lymphocyte	chr10:86754381:A:G	cg23219751	-0.483393	7.79165e-13	-0.459257	2.81739e-14	0.398878	4.37888e-11
Colon	Lymphocyte	chr11:12901887:T:C	cg03126561	-0.172865	0.00926206	-0.207706	0.000457008	0.37765	2.10647e-11
Colon	Lymphocyte	chr11:45272601:A:G	cg24023723	0.701794	2.77802e-43	0.661245	1.93281e-47	-0.265621	1.16424e-13
Colon	Lymphocyte	chr11:64148065:G:A	cg20160996	0.554652	2.61012e-10	0.575342	7.51599e-13	-0.519885	1.0378e-10
Colon	Lymphocyte	chr11:69136119:C:G	cg24610561	-0.150172	0.0268854	-0.0715503	0.235947	0.380005	2.40674e-11
Colon	Lymphocyte	chr11:99681338:A:AT	cg22878054	0.487524	1.14449e-21	0.485262	1.30905e-25	-0.287062	2.04036e-11
Colon	Lymphocyte	chr12:106988017:AAAACTGGTT:A	cg02274284	0.190186	0.0216277	0.190496	0.00785015	-0.52244	7.8598e-12
Colon	Lymphocyte	chr12:110156465:T:G	cg10330313	1.20929	2.04706e-44	1.28992	1.64093e-53	-0.377384	1.39048e-10
Colon	Lymphocyte	chr13:30697672:A:G	cg19157500	-1.01913	4.81099e-37	-0.982765	4.51289e-42	0.367075	1.43466e-11
Colon	Lymphocyte	chr13:52551342:G:A	cg05335186	0.316143	2.96634e-08	0.319636	4.90223e-10	-0.329872	1.17513e-10
Colon	Lymphocyte	chr13:52551342:G:A	cg12458913	0.853342	2.98253e-40	0.85615	7.87561e-47	-0.308322	9.13461e-12
Colon	Lymphocyte	chr13:61403216:A:G	cg12581627	-0.57902	2.60947e-32	-0.558151	5.21545e-36	0.238215	2.74778e-11
Colon	Lymphocyte	chr14:68386866:G:A	cg18593517	0.775864	1.29195e-26	0.746746	4.52307e-30	-0.426505	1.01379e-11
Colon	Lymphocyte	chr14:77051443:G:A	cg12488301	0.639782	1.66294e-26	0.614025	4.51709e-31	-0.339302	5.45789e-14
Colon	Lymphocyte	chr14:91091567:G:T	cg27654152	-0.663192	2.35675e-23	-0.646293	4.04747e-30	0.415922	9.9717e-17
Colon	Lymphocyte	chr15:40308855:GCTCTCCT:G	cg05884705	0.800136	4.36806e-22	0.761853	4.82065e-24	-0.435959	3.93497e-11
Colon	Lymphocyte	chr15:40308855:GCTCTCCT:G	cg05547778	0.762419	7.55697e-29	0.727467	2.715e-35	-0.425131	8.27329e-18
Colon	Lymphocyte	chr15:40308855:GCTCTCCT:G	cg14076977	0.777263	2.29121e-30	0.741803	1.78892e-36	-0.410085	4.62777e-17
Colon	Lymphocyte	chr15:40308855:GCTCTCCT:G	cg21931938	0.725348	8.10523e-31	0.694133	6.1338e-34	-0.323122	4.6452e-12
Colon	Lymphocyte	chr15:42212978:C:T	cg18814616	1.2752	1.92088e-40	1.31086	9.22014e-49	-0.384901	1.48222e-12
Colon	Lymphocyte	chr15:68230512:G:A	cg22576950	0.184908	0.0013603	0.170852	0.000472576	-0.415071	2.03508e-14
Colon	Lymphocyte	chr15:78181067:G:GT	cg23020028	-0.21241	0.00375324	-0.159613	0.0115879	0.542571	6.39729e-13
Colon	Lymphocyte	chr15:93091704:C:T	cg16035236	-0.269969	1.21956e-11	-0.302008	5.33926e-18	0.215608	1.30597e-11
Colon	Lymphocyte	chr16:67955620:T:C	cg25738319	-0.861484	1.19148e-26	-0.82783	1.03978e-31	0.415957	1.12742e-14
Colon	Lymphocyte	chr16:80319372:C:A	cg14172705	-0.433999	3.41275e-17	-0.426064	9.72681e-21	0.300632	1.84391e-12
Colon	Lymphocyte	chr16:89158755:G:A	cg04694209	0.381954	1.15842e-16	0.346495	4.34626e-17	-0.239662	4.90867e-11
Colon	Lymphocyte	chr17:36851549:G:T	cg13102742	-1.27823	2.13211e-79	-1.25769	4.14606e-86	-0.219235	1.07834e-11
Colon	Lymphocyte	chr17:81097165:C:G	cg12324119	0.343647	2.98456e-13	0.375385	9.93975e-19	-0.25579	2.67093e-12
Colon	Lymphocyte	chr17:82596100:A:AGGCCACACCTGC	cg05580415	-0.482653	3.02791e-16	-0.489506	1.13198e-21	0.373626	4.18297e-15
Colon	Lymphocyte	chr17:82596100:A:AGGCCACACCTGC	cg16375265	-0.935413	7.85445e-33	-0.938907	5.94293e-40	0.422732	9.62902e-14
Colon	Lymphocyte	chr17:83063967:C:T	cg14621217	-0.22731	0.00100329	-0.233451	5.69493e-05	-0.504484	4.61739e-15
Colon	Lymphocyte	chr18:13235176:G:A	cg08814944	0.583726	6.11185e-27	0.576227	1.74943e-31	-0.268112	4.3301e-12
Colon	Lymphocyte	chr19:7224339:C:T	cg09779027	0.544278	2.80194e-33	0.545687	1.63617e-40	-0.236178	5.51882e-14
Colon	Lymphocyte	chr19:7222028:C:CAA	cg00428638	0.551797	4.67003e-33	0.5419	8.38265e-40	-0.244901	8.85677e-15
Colon	Lymphocyte	chr20:7266592:A:G	cg11909513	0.387092	8.29734e-10	0.415043	4.24926e-13	-0.402544	4.17151e-11
Colon	Lymphocyte	chr20:16476994:G:A	cg19090398	1.04724	1.3539e-46	1.05376	4.98605e-54	-0.290748	3.19493e-11
Colon	Lymphocyte	chr22:42810222:G:C	cg00524659	-0.484741	3.857e-17	-0.462511	2.64987e-19	0.349788	1.73185e-11
Colon	Myeloid cell	chr1:3109282:T:A	cg22720392	0.178293	0.0254624	0.220789	0.0016145	-0.479531	6.85778e-12
Colon	Myeloid cell	chr1:53916710:C:T	cg05968400	-0.0967477	0.0146264	-0.0779848	0.0215707	0.230817	5.67817e-11
Colon	Myeloid cell	chr1:84779381:C:T	cg12617456	-0.0786196	0.187703	-0.0419626	0.44115	-0.476717	2.25957e-11
Colon	Myeloid cell	chr1:221842765:A:T	cg25631876	0.93478	2.26269e-45	0.93225	6.73355e-51	-0.3073	5.11341e-11
Colon	Myeloid cell	chr1:226110298:T:C	cg16991637	1.36671	3.10294e-54	1.41901	5.88652e-64	0.399339	1.01373e-12
Colon	Myeloid cell	chr1:228211422:A:C	cg18477163	0.999705	1.43091e-44	1.02634	4.93263e-53	0.356834	1.42258e-12
Colon	Myeloid cell	chr2:12629450:T:A	cg06200244	0.265333	0.000543177	0.210022	0.00123038	-0.480386	1.9065e-14
Colon	Myeloid cell	chr2:237906181:A:C	cg13388618	-1.04895	1.42691e-60	-1.04347	1.16465e-67	-0.265109	7.79183e-12
Colon	Myeloid cell	chr4:166817044:G:A	cg20296596	1.05225	6.6273e-40	1.01608	1.27321e-44	-0.365044	9.63155e-11
Colon	Myeloid cell	chr4:169017295:G:A	cg13206224	-0.184055	0.0010792	-0.18944	0.000119045	0.339305	5.09406e-11
Colon	Myeloid cell	chr4:182809887:T:C	cg19182683	1.17082	1.17064e-52	1.16981	4.96832e-62	0.352458	2.77047e-13
Colon	Myeloid cell	chr4:183634976:G:C	cg20590068	-0.183383	0.0587398	-0.118043	0.168265	0.563035	1.54605e-11
Colon	Myeloid cell	chr6:54086067:G:A	cg21907309	-1.04477	6.59067e-38	-0.995992	6.87562e-42	0.391245	5.91126e-13
Colon	Myeloid cell	chr8:100738273:G:C	cg09367290	0.0930185	0.0466352	0.107747	0.00951461	-0.283705	3.58114e-11
Colon	Myeloid cell	chr9:6631099:A:G	cg16277608	-1.02642	3.48271e-52	-1.02146	1.5325e-58	-0.283811	3.95452e-11
Colon	Myeloid cell	chr10:59173023:T:C	cg23272287	0.883189	5.24351e-27	0.90025	2.28214e-32	0.422233	7.11072e-11
Colon	Myeloid cell	chr11:66581032:C:T	cg24851651	-0.959333	1.88287e-51	-0.922862	1.11236e-56	-0.298079	8.11653e-13
Colon	Myeloid cell	chr12:27793986:T:C	cg22190077	1.21393	3.12545e-36	1.14491	2.55129e-39	0.444167	5.8769e-12
Colon	Myeloid cell	chr12:49299993:T:C	cg02054252	0.23634	0.00908824	0.230304	0.00407778	0.574703	4.60007e-11
Colon	Myeloid cell	chr12:128795443:G:C	cg09035930	0.831521	9.34226e-41	0.823427	9.61856e-47	0.29933	1.31288e-11
Colon	Myeloid cell	chr14:100603564:G:T	cg10829391	1.07607	2.35535e-50	1.0514	2.65872e-59	0.345189	1.36418e-15
Colon	Myeloid cell	chr16:67991092:G:A	cg02184558	0.665531	1.22367e-23	0.658524	2.11805e-27	0.335579	1.54267e-10
Colon	Myeloid cell	chr17:36851549:G:T	cg13102742	-1.27823	2.13211e-79	-1.26429	3.01744e-88	-0.256358	1.66404e-13
Colon	Myeloid cell	chr19:612234:A:G	cg18754695	-0.00760216	0.886914	0.0125384	0.785103	-0.312426	2.06439e-11
Colon	Myeloid cell	chr19:18587411:T:C	cg00667525	0.51025	1.236e-13	0.585451	7.00869e-20	0.400688	1.88858e-11
Colon	Myeloid cell	chr20:16475129:G:T	cg17413035	1.05982	1.549e-52	1.05953	2.39139e-59	-0.321228	1.87288e-11
Colon	Stromal cell	chr1:1866508:A:G	cg23982607	-1.03394	5.59642e-51	-1.07467	5.13111e-59	0.291242	6.47093e-11
Colon	Stromal cell	chr1:7318228:GAGGCACTGAGC:G	cg25072257	-0.555557	4.34995e-13	-0.563567	3.30013e-16	0.496521	3.09903e-12
Colon	Stromal cell	chr1:11071610:C:CCT	cg00375145	-0.746422	8.08533e-24	-0.752602	3.39044e-28	0.366901	5.10499e-11
Colon	Stromal cell	chr1:11813359:A:C	cg01958606	0.760379	1.57322e-16	0.690278	3.78709e-17	-0.539269	9.65747e-12
Colon	Stromal cell	chr1:11982204:A:G	cg13216073	0.955505	3.35789e-39	0.970091	1.27979e-47	-0.398107	3.66126e-13
Colon	Stromal cell	chr1:12156431:A:C	cg21393163	-0.119267	0.0613463	-0.145334	0.00945679	0.458038	4.74968e-12
Colon	Stromal cell	chr1:23173423:T:C	cg26491092	0.949489	1.54794e-36	0.967238	7.59118e-44	-0.383646	1.759e-12
Colon	Stromal cell	chr1:28248629:T:G	cg02251754	0.853302	3.19737e-37	0.861984	2.27007e-43	-0.296608	4.82109e-11
Colon	Stromal cell	chr1:30097024:G:A	cg08471952	-0.318755	1.56476e-08	-0.307255	5.62574e-10	0.355907	1.52797e-12
Colon	Stromal cell	chr1:33296061:T:C	cg15059804	-0.588701	1.49031e-15	-0.630054	6.83966e-21	0.401505	5.0122e-12
Colon	Stromal cell	chr1:41537350:C:T	cg06473178	-0.850635	5.31234e-24	-0.764664	1.17299e-25	-0.555049	1.3806e-14
Colon	Stromal cell	chr1:55257768:C:T	cg14861827	-0.856331	1.1626e-33	-0.769257	4.25169e-36	0.389823	7.06562e-16
Colon	Stromal cell	chr1:66491002:G:A	cg26647036	-0.941721	8.21351e-45	-0.933463	2.77903e-50	0.321367	6.98997e-11
Colon	Stromal cell	chr1:94821496:C:A	cg24013761	-0.0142463	0.714653	-0.011105	0.746929	0.231653	2.32709e-11
Colon	Stromal cell	chr1:94975736:C:T	cg07982651	0.525408	1.23381e-09	0.500532	4.10635e-11	-0.498503	1.4952e-11
Colon	Stromal cell	chr1:99580690:T:G	cg13423563	0.931851	2.53033e-43	0.905003	7.34447e-49	0.312107	1.41114e-12
Colon	Stromal cell	chr1:152033006:C:G	cg09158440	0.466522	3.6555e-06	0.479905	2.64664e-08	0.670902	6.08537e-15
Colon	Stromal cell	chr1:152495275:G:A	cg13950578	1.35287	2.66278e-52	1.31038	1.16833e-58	-0.448469	6.04338e-14
Colon	Stromal cell	chr1:154431860:C:T	cg27397230	0.706692	4.47582e-21	0.752082	1.15192e-28	-0.50378	1.40768e-14
Colon	Stromal cell	chr1:154731249:G:A	cg13572380	-0.484054	1.75881e-30	-0.47678	2.28509e-35	0.247986	6.13194e-12
Colon	Stromal cell	chr1:158116625:C:T	cg17345026	1.49328	1.18508e-42	1.53055	4.89992e-51	-0.540796	1.43085e-12
Colon	Stromal cell	chr1:165842492:C:T	cg01427815	1.12946	9.61923e-60	1.1444	9.18979e-68	-0.278978	5.23061e-12
Colon	Stromal cell	chr1:178003792:C:T	cg08733291	1.02011	5.85002e-52	1.00309	1.29651e-60	0.323341	4.93759e-14
Colon	Stromal cell	chr1:180513488:G:A	cg11827190	1.01309	5.72503e-31	1.02871	3.66472e-39	-0.502701	4.50886e-15
Colon	Stromal cell	chr1:183186170:G:A	cg12552165	-0.614362	1.05663e-21	-0.651502	5.98406e-29	-0.396546	1.8979e-13
Colon	Stromal cell	chr1:192515359:C:T	cg15041339	0.433628	6.12537e-14	0.455826	1.00916e-19	-0.365643	1.19972e-14
Colon	Stromal cell	chr1:202203641:T:G	cg04811114	1.06666	1.24263e-49	1.04707	1.54222e-59	-0.354637	1.46329e-17
Colon	Stromal cell	chr1:202203641:T:G	cg05044291	0.982741	8.8232e-36	0.972441	6.12527e-47	-0.445915	1.398e-19
Colon	Stromal cell	chr1:207078173:G:A	cg06640374	-0.514685	1.72215e-23	-0.535188	3.28153e-31	-0.308667	4.93083e-14
Colon	Stromal cell	chr1:207890463:G:A	cg27004073	0.700014	2.12792e-23	0.654004	3.19955e-26	-0.385465	6.95963e-13
Colon	Stromal cell	chr1:207890463:G:A	cg21924403	0.574504	1.56337e-21	0.535337	1.13158e-23	-0.334407	1.40686e-12
Colon	Stromal cell	chr1:218524685:C:T	cg14378539	-1.10091	3.08555e-52	-1.10478	3.30077e-63	-0.370446	3.94035e-16
Colon	Stromal cell	chr1:225781329:T:C	cg18695564	0.0390315	0.129786	0.0463676	0.0378812	-0.157909	3.52507e-12
Colon	Stromal cell	chr1:226990182:T:TACA	cg10327440	-1.25719	6.07843e-82	-1.26813	5.27095e-97	-0.296601	9.58565e-19
Colon	Stromal cell	chr1:246200316:T:C	cg02077920	0.896775	3.93464e-17	0.811011	9.34791e-18	-0.606561	5.36555e-12
Colon	Stromal cell	chr1:246485145:T:C	cg14580920	0.425372	3.28e-08	0.385175	3.72018e-10	-0.652993	1.19996e-19
Colon	Stromal cell	chr2:7053004:T:C	cg14990413	0.00885132	0.933451	-0.0394703	0.661281	-0.705161	1.0469e-13
Colon	Stromal cell	chr2:8324697:T:A	cg12167548	0.622078	8.84826e-21	0.662677	5.3126e-28	-0.370129	1.26031e-11
Colon	Stromal cell	chr2:10717637:G:A	cg10005305	0.47272	5.70612e-10	0.459866	1.10107e-12	-0.510004	3.6222e-15
Colon	Stromal cell	chr2:27428508:C:T	cg01969012	-1.08585	8.27674e-40	-1.16329	2.91568e-53	0.504614	1.70962e-16
Colon	Stromal cell	chr2:32904614:C:G	cg13652008	0.0755027	0.0125049	0.0808771	0.00254559	-0.204415	3.3195e-11
Colon	Stromal cell	chr2:43294028:G:A	cg08715262	-0.690752	3.98505e-18	-0.696926	2.4638e-22	-0.422502	2.41076e-12
Colon	Stromal cell	chr2:48595242:G:A	cg00209038	0.657908	4.67903e-20	0.676371	3.18013e-25	0.421072	4.96151e-12
Colon	Stromal cell	chr2:48595242:G:A	cg20156659	0.629089	2.41256e-19	0.646744	5.23829e-24	0.399507	2.94111e-11
Colon	Stromal cell	chr2:106022932:T:G	cg23599385	0.363381	5.81859e-16	0.388344	6.89556e-23	-0.295671	1.42824e-14
Colon	Stromal cell	chr2:109265096:T:A	cg11212023	0.704562	4.71461e-32	0.720705	2.86303e-39	-0.336689	2.25398e-11
Colon	Stromal cell	chr2:113827728:A:G	cg21130420	-0.0392596	0.586896	-0.0295203	0.609555	0.564415	3.8162e-19
Colon	Stromal cell	chr2:113833617:A:G	cg16192086	-0.838733	3.22854e-35	-0.853355	4.81895e-43	0.331917	3.77837e-12
Colon	Stromal cell	chr2:132400270:T:C	cg25291037	1.11537	6.35602e-53	1.12197	8.62784e-67	-0.329448	1.28053e-16
Colon	Stromal cell	chr2:161131972:T:C	cg08168884	-0.0742997	0.249373	0.0428593	0.470842	0.38929	4.78238e-12
Colon	Stromal cell	chr2:201159226:A:G	cg16040230	0.442196	1.75707e-19	0.442525	4.35126e-23	-0.274018	9.43942e-11
Colon	Stromal cell	chr2:222847054:C:T	cg17109053	-0.232456	3.2874e-05	-0.201483	4.59382e-05	-0.360012	2.99606e-11
Colon	Stromal cell	chr2:235027165:G:C	cg15508768	-0.499416	8.18127e-19	-0.466733	6.45633e-21	-0.312533	3.15864e-11
Colon	Stromal cell	chr2:235027165:G:C	cg06431347	-0.704488	8.57366e-25	-0.665642	1.16358e-28	-0.403463	1.2343e-13
Colon	Stromal cell	chr2:237538525:T:C	cg07053536	-0.528225	2.99306e-10	-0.60407	5.99761e-15	0.461728	2.76946e-11
Colon	Stromal cell	chr2:237590675:A:G	cg10458446	0.500454	2.23687e-24	0.468654	6.37464e-28	-0.295432	4.75559e-15
Colon	Stromal cell	chr2:240896921:T:C	cg04903544	-0.76981	1.3983e-23	-0.746976	1.2671e-29	0.484589	2.72057e-16
Colon	Stromal cell	chr3:12983402:T:C	cg01196118	-1.14003	1.21711e-22	-1.13865	9.12518e-28	0.690972	6.83524e-13
Colon	Stromal cell	chr3:27561495:G:A	cg19814552	0.416506	1.42109e-07	0.428671	1.16611e-09	0.460264	2.11278e-11
Colon	Stromal cell	chr3:42987660:C:A	cg06580551	0.320531	0.000183219	0.210065	0.0061136	0.529574	4.11269e-11
Colon	Stromal cell	chr3:45200130:C:G	cg06798115	-0.490119	6.36056e-16	-0.555475	7.6977e-23	-0.351827	2.62523e-12
Colon	Stromal cell	chr3:49794828:A:G	cg02037349	-0.793662	4.12048e-30	-0.843281	1.33353e-38	0.394773	4.37763e-13
Colon	Stromal cell	chr3:52835247:C:A	cg20735041	0.165176	2.84648e-05	0.193073	3.87813e-09	-0.303399	6.50746e-18
Colon	Stromal cell	chr3:58493627:A:G	cg06643156	0.584622	5.00583e-11	0.575048	2.81411e-13	-0.509039	1.7824e-12
Colon	Stromal cell	chr3:65203691:C:T	cg22300541	0.62638	3.60616e-36	0.658168	4.02458e-46	-0.291883	2.6908e-14
Colon	Stromal cell	chr3:100173981:C:T	cg05273695	0.539992	5.08842e-09	0.549196	1.37555e-11	-0.56517	8.21602e-13
Colon	Stromal cell	chr3:101785830:G:A	cg15941598	0.673263	2.56946e-36	0.691372	2.45411e-44	0.245233	8.31985e-11
Colon	Stromal cell	chr3:122910575:C:T	cg06823220	0.11063	0.13055	0.144332	0.0236018	0.446124	1.24395e-12
Colon	Stromal cell	chr3:125207859:G:A	cg05256313	-0.159071	0.0253842	-0.172457	0.00211581	0.540965	7.43251e-20
Colon	Stromal cell	chr3:138080449:A:T	cg15546194	-0.353211	0.000140529	-0.368064	5.41259e-06	-0.567988	8.94858e-13
Colon	Stromal cell	chr3:157099727:C:G	cg04287416	0.678781	5.37404e-24	0.642336	7.53187e-28	0.402319	7.53323e-14
Colon	Stromal cell	chr3:170557329:A:G	cg01289541	1.0077	9.62091e-27	0.968659	1.21998e-29	-0.450493	5.52798e-11
Colon	Stromal cell	chr3:190123081:A:ATGAG	cg02757804	0.410303	3.448e-18	0.430579	1.318e-24	-0.316796	7.89097e-15
Colon	Stromal cell	chr3:194535324:G:C	cg23035323	-0.157968	0.0439051	-0.194799	0.00481927	0.468588	3.60541e-11
Colon	Stromal cell	chr4:3462949:T:TAGTGGG	cg25120210	-0.974716	1.05668e-60	-1.0038	2.94568e-72	-0.302302	1.1964e-14
Colon	Stromal cell	chr4:25970670:G:C	cg18246393	0.692783	2.01922e-27	0.663159	1.70528e-30	-0.293327	3.84646e-11
Colon	Stromal cell	chr4:45944196:A:G	cg08046784	1.10176	2.21451e-70	1.0979	1.36295e-79	-0.245839	2.06955e-12
Colon	Stromal cell	chr4:55059248:G:C	cg19926531	1.0554	1.62309e-51	1.01884	1.01286e-56	-0.352216	2.70472e-12
Colon	Stromal cell	chr4:73483441:G:A	cg10270595	-0.228634	3.5983e-06	-0.256311	4.84059e-09	-0.308199	2.92024e-11
Colon	Stromal cell	chr4:78541406:A:T	cg00319655	-0.312507	1.98289e-07	-0.202387	0.000166992	0.374293	5.4338e-11
Colon	Stromal cell	chr4:94650825:G:C	cg00096603	0.00159645	0.979425	-0.0377172	0.481793	-0.430954	7.43292e-13
Colon	Stromal cell	chr4:128468583:A:G	cg16301894	1.00563	3.42483e-59	0.947469	7.86833e-62	-0.252504	2.04796e-12
Colon	Stromal cell	chr4:156738983:C:T	cg02591638	0.168249	0.0230844	0.197537	0.00247336	0.559062	6.44074e-12
Colon	Stromal cell	chr4:166817044:G:A	cg20296596	1.05225	6.6273e-40	1.01518	2.38837e-50	0.542283	5.04649e-20
Colon	Stromal cell	chr4:176877458:C:T	cg22648556	-1.12629	1.78935e-47	-1.07095	7.92665e-53	0.335185	5.60044e-14
Colon	Stromal cell	chr5:33640953:T:C	cg10594543	0.746688	1.41961e-16	0.820893	6.62695e-25	0.58234	1.53028e-16
Colon	Stromal cell	chr5:132101145:C:T	cg09062922	-0.986995	2.25518e-56	-0.987474	4.47433e-63	0.238754	5.70682e-11
Colon	Stromal cell	chr5:132433581:G:A	cg02682369	0.772045	6.49681e-21	0.744745	5.44217e-25	-0.4471	2.77827e-14
Colon	Stromal cell	chr5:150601596:C:T	cg07240785	0.267018	0.000252702	0.291384	1.60732e-06	-0.539908	6.06863e-16
Colon	Stromal cell	chr5:163449295:AAGGTCAC:A	cg25620989	1.00733	1.12983e-37	0.984536	2.3614e-45	0.403382	5.55185e-12
Colon	Stromal cell	chr5:169203924:C:T	cg27390840	-0.339294	4.00182e-09	-0.372376	7.73138e-13	-0.384447	2.69697e-12
Colon	Stromal cell	chr5:177978074:G:A	cg18808692	-0.872084	9.9539e-30	-0.938611	3.5873e-38	-0.433685	3.41298e-12
Colon	Stromal cell	chr5:178393133:T:C	cg06730250	-0.936252	1.02246e-28	-0.947607	1.90258e-35	-0.481496	1.31256e-13
Colon	Stromal cell	chr5:179258843:G:A	cg08999896	0.805839	3.4521e-27	0.789183	1.34342e-32	-0.395911	1.05527e-13
Colon	Stromal cell	chr6:6834441:G:A	cg23207339	0.339064	3.14557e-06	0.336529	8.63304e-08	-0.443241	1.79089e-12
Colon	Stromal cell	chr6:8495979:A:G	cg02090877	-1.11812	1.96282e-45	-1.11491	2.42095e-53	-0.361327	3.4785e-13
Colon	Stromal cell	chr6:24644906:C:T	cg00944873	-1.3669	1.03491e-77	-1.37191	3.81255e-86	0.244801	2.29383e-12
Colon	Stromal cell	chr6:28140307:C:T	cg02683197	0.800425	2.00183e-25	0.799479	5.12048e-30	-0.41509	1.32308e-11
Colon	Stromal cell	chr6:32478648:GAAT:G	cg03373132	0.126659	0.13697	0.10639	0.137737	0.553581	9.71944e-15
Colon	Stromal cell	chr6:33568009:C:T	cg13560919	-1.26518	9.45737e-43	-1.30078	6.59685e-52	-0.505327	2.04615e-13
Colon	Stromal cell	chr6:47634566:G:A	cg16361253	0.295215	0.00742466	0.435538	1.15498e-05	-0.712706	1.62563e-11
Colon	Stromal cell	chr6:144879169:G:A	cg04195062	-0.536966	3.37463e-13	-0.54283	1.94001e-16	0.443076	4.96169e-12
Colon	Stromal cell	chr6:165797531:G:A	cg25957599	0.292787	0.00942959	0.224705	0.0207684	-0.735761	1.32513e-11
Colon	Stromal cell	chr6:167793777:T:C	cg03298716	0.527483	7.41402e-20	0.526431	5.11415e-24	-0.32663	3.03283e-12
Colon	Stromal cell	chr6:167793777:T:C	cg05733780	0.687888	1.51791e-25	0.691956	1.88219e-32	-0.397004	2.78152e-15
Colon	Stromal cell	chr6:168887198:G:A	cg26973414	-0.626549	4.91707e-18	-0.692506	1.17613e-25	-0.445963	4.14179e-15
Colon	Stromal cell	chr6:169761885:A:G	cg26850117	-1.36614	1.99845e-83	-1.34301	6.20046e-90	0.220259	3.70448e-11
Colon	Stromal cell	chr7:7830361:G:T	cg26221442	0.076332	0.182492	0.0483571	0.337849	-0.358666	2.10112e-11
Colon	Stromal cell	chr7:36582012:A:G	cg18154404	-0.50938	7.71411e-15	-0.593234	9.9778e-22	-0.419585	5.72761e-12
Colon	Stromal cell	chr7:96251217:C:T	cg06098425	-0.926139	7.82671e-50	-0.889398	1.17157e-56	0.31576	1.16224e-14
Colon	Stromal cell	chr7:96281893:G:C	cg17096719	0.639164	3.41024e-18	0.629262	3.121e-21	-0.385129	5.91389e-11
Colon	Stromal cell	chr7:98167323:C:T	cg21770322	0.95663	1.09315e-38	0.935968	2.60995e-43	-0.322929	7.91135e-11
Colon	Stromal cell	chr7:101718251:G:C	cg26565544	1.21004	3.88142e-43	1.16013	5.02679e-47	0.39791	1.48431e-11
Colon	Stromal cell	chr7:116777794:G:C	cg05727605	0.326158	2.29526e-10	0.316853	4.36447e-12	0.337311	1.8e-11
Colon	Stromal cell	chr7:116777794:G:C	cg08074000	0.22796	1.82874e-06	0.22572	1.05039e-07	0.326765	1.06458e-11
Colon	Stromal cell	chr7:134908760:C:G	cg22430036	0.737069	7.60454e-31	0.719532	5.27913e-35	0.31823	2.04718e-11
Colon	Stromal cell	chr7:135171535:CCT:C	cg19889856	0.715541	6.87478e-26	0.727606	7.12269e-32	0.37404	2.64817e-12
Colon	Stromal cell	chr7:150323400:T:C	cg14442992	0.483832	5.77402e-08	0.562894	3.89861e-12	-0.505448	1.41101e-11
Colon	Stromal cell	chr7:159079053:G:A	cg16754460	0.0674069	0.50783	0.00516439	0.952162	0.65717	6.52367e-15
Colon	Stromal cell	chr8:1861729:C:T	cg25881328	-1.06455	1.48838e-24	-1.06924	4.64479e-29	-0.587064	3.67773e-11
Colon	Stromal cell	chr8:5145414:C:T	cg09862711	-0.0122739	0.888935	-0.0129664	0.86699	-0.535348	1.01024e-11
Colon	Stromal cell	chr8:8822478:G:C	cg16587547	-0.964637	5.50151e-27	-0.994617	2.80754e-33	-0.500468	6.40643e-12
Colon	Stromal cell	chr8:9147783:CTAAT:C	cg20400248	0.448769	1.19627e-14	0.436938	3.62623e-17	-0.291472	6.27284e-12
Colon	Stromal cell	chr8:11862718:G:C	cg01002857	0.848386	3.92901e-36	0.832542	1.36858e-40	-0.336881	4.13619e-11
Colon	Stromal cell	chr8:48617425:C:A	cg10771525	-1.05827	2.42513e-54	-1.02336	4.74477e-65	-0.360319	2.74307e-18
Colon	Stromal cell	chr8:80965161:A:G	cg23313235	0.765215	7.09635e-28	0.740814	9.52371e-34	0.413799	8.24453e-15
Colon	Stromal cell	chr8:88553655:A:G	cg09462937	1.30419	5.42399e-66	1.31868	6.77999e-77	0.369292	2.47474e-14
Colon	Stromal cell	chr8:101014453:C:T	cg01672320	0.0468579	0.475435	-0.0275624	0.635506	-0.397319	4.44582e-12
Colon	Stromal cell	chr8:129241197:G:C	cg16675872	0.638302	1.37265e-11	0.648845	1.01563e-14	-0.535549	1.72948e-12
Colon	Stromal cell	chr8:133352302:C:T	cg25030508	0.330608	8.7069e-15	0.319512	9.33271e-19	-0.297849	2.46835e-16
Colon	Stromal cell	chr8:139911832:G:A	cg06874250	0.987003	2.7232e-32	0.926952	5.73168e-37	-0.411768	1.59501e-14
Colon	Stromal cell	chr8:139911832:G:A	cg02818464	0.846151	6.72441e-27	0.785985	1.45244e-30	-0.392795	7.89211e-14
Colon	Stromal cell	chr8:141275243:C:T	cg16927416	0.690836	1.03145e-29	0.676347	4.35577e-35	0.32012	6.55245e-13
Colon	Stromal cell	chr8:142399832:G:A	cg24996280	0.835927	4.14517e-23	0.805343	1.39663e-28	-0.531918	2.58799e-16
Colon	Stromal cell	chr8:142780034:T:G	cg01745932	-1.04677	3.89662e-35	-1.0239	1.90369e-40	-0.435526	1.72082e-12
Colon	Stromal cell	chr8:143511626:G:C	cg12688965	0.58306	1.23113e-31	0.584151	4.00575e-37	-0.255175	1.67452e-11
Colon	Stromal cell	chr8:143547693:A:C	cg00036352	1.38572	1.74699e-64	1.34843	1.25086e-68	-0.332313	2.20426e-11
Colon	Stromal cell	chr9:88810039:G:A	cg26614260	0.956689	3.12441e-40	0.966472	1.57193e-46	0.338885	1.85152e-11
Colon	Stromal cell	chr9:90454815:G:T	cg10497277	-0.871463	7.99644e-26	-0.887808	3.33095e-31	-0.445165	3.51467e-11
Colon	Stromal cell	chr9:137461922:C:A	cg13857646	1.05999	1.84538e-62	1.03449	8.04369e-70	0.274998	3.7597e-13
Colon	Stromal cell	chr10:1325089:A:C	cg06385202	1.00136	4.37816e-60	1.01467	2.25941e-70	0.270476	5.18029e-14
Colon	Stromal cell	chr10:3525253:G:A	cg14308648	1.02684	4.83617e-34	1.04699	2.95726e-41	0.536662	1.37244e-12
Colon	Stromal cell	chr10:11046115:C:T	cg05833351	-0.762404	3.9541e-35	-0.7737	1.12611e-42	0.322554	2.13187e-13
Colon	Stromal cell	chr10:18165543:A:G	cg12643710	0.482796	2.18747e-15	0.50142	8.26386e-20	-0.390305	5.23206e-12
Colon	Stromal cell	chr10:48493830:G:A	cg10237277	-0.876791	3.272e-43	-0.878427	3.07991e-49	0.308061	4.43727e-11
Colon	Stromal cell	chr10:49171988:C:T	cg12771178	0.897974	1.40102e-36	0.903059	5.34894e-46	-0.451497	5.99316e-16
Colon	Stromal cell	chr10:49421337:G:A	cg14883733	0.178425	6.15786e-05	0.194537	3.27937e-07	0.306608	1.5845e-14
Colon	Stromal cell	chr10:59678952:T:C	cg22380090	-0.621746	1.7019e-30	-0.667242	1.61733e-38	0.30092	2.56623e-12
Colon	Stromal cell	chr10:71504513:A:G	cg11932029	0.867612	1.45064e-34	0.863412	1.41627e-40	-0.372962	1.69971e-11
Colon	Stromal cell	chr10:123905062:A:AGC	cg15037851	0.25028	0.000217153	0.220878	0.000100807	-0.473202	2.9406e-15
Colon	Stromal cell	chr11:3126773:G:A	cg26036858	0.826999	8.63049e-22	0.748	1.43228e-22	-0.495	2.82773e-12
Colon	Stromal cell	chr11:9969223:G:T	cg04073358	1.12643	2.53573e-32	1.13394	1.43234e-45	0.657609	1.18447e-22
Colon	Stromal cell	chr11:10668273:C:A	cg16726577	-0.318488	0.000228402	-0.334273	3.04601e-07	-0.764796	8.09546e-24
Colon	Stromal cell	chr11:12270258:A:G	cg27392413	-0.811052	1.80912e-39	-0.835581	2.80627e-47	-0.336775	5.76365e-12
Colon	Stromal cell	chr11:27282390:C:T	cg10370305	-0.0741292	0.399257	-0.132351	0.0677627	-0.728431	6.69327e-17
Colon	Stromal cell	chr11:47190992:A:G	cg03339077	0.318867	1.01102e-09	0.315165	8.4592e-14	-0.406607	1.49539e-19
Colon	Stromal cell	chr11:47163959:A:G	cg09921266	0.650613	2.08081e-22	0.674533	5.19955e-28	0.341885	1.38392e-10
Colon	Stromal cell	chr11:60841181:T:C	cg18856296	-0.890797	2.0818e-48	-0.883444	9.25617e-57	0.293379	3.49834e-14
Colon	Stromal cell	chr11:75276977:G:GTCCCC	cg22867893	-1.22407	1.22954e-71	-1.25211	1.13762e-82	0.261707	2.97347e-13
Colon	Stromal cell	chr11:75583288:A:G	cg09786210	0.0161147	0.830994	-0.0375437	0.563356	0.507282	4.02591e-13
Colon	Stromal cell	chr11:75582937:G:A	cg15968721	-0.628518	5.04862e-28	-0.660348	2.72272e-35	0.289478	1.53662e-11
Colon	Stromal cell	chr11:79461295:T:C	cg17741110	0.333802	0.00120033	0.302783	0.000794486	0.723031	1.86766e-12
Colon	Stromal cell	chr11:90128745:T:C	cg23743573	0.729184	2.17171e-17	0.679501	4.01215e-19	-0.506419	2.04176e-12
Colon	Stromal cell	chr11:90130618:T:C	cg14960550	0.687487	2.15017e-17	0.638591	1.80114e-19	-0.497933	1.48683e-13
Colon	Stromal cell	chr11:90114273:A:G	cg26945217	0.746527	1.87831e-18	0.714397	4.97651e-21	-0.49015	4.46033e-12
Colon	Stromal cell	chr11:94603265:T:C	cg01887834	-0.814376	3.17721e-43	-0.774707	5.34994e-47	0.284688	7.06347e-12
Colon	Stromal cell	chr12:52533038:C:T	cg16016366	-0.604699	8.98883e-23	-0.693128	2.16671e-32	0.347784	8.98086e-14
Colon	Stromal cell	chr12:54182016:C:A	cg08025038	0.948479	4.32728e-39	0.936172	2.42043e-46	-0.358989	3.68143e-14
Colon	Stromal cell	chr12:89456163:A:G	cg13848087	-0.0424556	0.559243	-0.0161667	0.796927	0.508345	1.87071e-12
Colon	Stromal cell	chr12:94636947:G:C	cg14223669	-0.0467292	0.560071	-0.103266	0.149533	0.52454	4.92712e-11
Colon	Stromal cell	chr12:103784451:T:C	cg02344784	0.569531	3.75873e-23	0.567209	9.2496e-29	-0.306117	1.76716e-11
Colon	Stromal cell	chr12:130660836:G:GT	cg15658768	0.855218	1.42477e-29	0.891776	5.47017e-41	-0.509192	3.20014e-18
Colon	Stromal cell	chr13:30697672:A:G	cg19157500	-1.01913	4.81099e-37	-1.02512	1.97674e-43	0.383212	1.88952e-11
Colon	Stromal cell	chr13:36094644:C:T	cg26403760	0.505433	9.42494e-13	0.516	1.1779e-16	-0.498376	7.29422e-14
Colon	Stromal cell	chr13:44231356:T:C	cg19190762	0.636855	1.90451e-34	0.652771	3.86868e-41	-0.272929	8.54254e-11
Colon	Stromal cell	chr13:112906065:T:C	cg26269162	-0.226505	0.000293949	-0.310523	8.31051e-08	0.39349	2.23514e-11
Colon	Stromal cell	chr14:68294269:C:G	cg11974136	-0.622844	3.00997e-26	-0.654486	6.38955e-33	-0.318855	2.34059e-11
Colon	Stromal cell	chr14:75515513:T:C	cg09415825	0.779452	1.39404e-48	0.792731	1.26133e-55	0.24332	5.60808e-11
Colon	Stromal cell	chr14:76828607:C:T	cg13001075	0.71837	1.48988e-21	0.669109	2.04034e-23	-0.422895	6.48328e-12
Colon	Stromal cell	chr14:100532511:A:G	cg19590140	0.544445	1.58079e-11	0.558158	1.66454e-15	0.459146	2.23792e-12
Colon	Stromal cell	chr14:100603552:CT:C	cg10829391	1.07607	2.35535e-50	1.11787	2.03855e-58	-0.315237	4.19467e-11
Colon	Stromal cell	chr14:104234511:C:G	cg21859216	0.686449	3.38831e-14	0.727745	6.02033e-19	-0.535447	2.31701e-11
Colon	Stromal cell	chr15:26052186:A:G	cg19800635	-0.933066	2.48255e-30	-0.882479	4.13132e-34	-0.471356	2.42479e-13
Colon	Stromal cell	chr15:26052477:C:T	cg18767073	-1.08195	5.34314e-60	-1.03921	1.14646e-67	-0.314192	5.78617e-15
Colon	Stromal cell	chr15:32899146:AAAAC:A	cg14111612	0.206244	0.0031064	0.175699	0.00412287	-0.466882	8.17583e-12
Colon	Stromal cell	chr15:33120270:A:C	cg25898192	-0.59596	1.66872e-18	-0.640731	1.51609e-25	-0.41053	7.2816e-14
Colon	Stromal cell	chr15:40308855:GCTCTCCT:G	cg14076977	0.777263	2.29121e-30	0.694731	1.45307e-29	-0.363362	3.36908e-11
Colon	Stromal cell	chr15:40308855:GCTCTCCT:G	cg21931938	0.725348	8.10523e-31	0.6588	1.75621e-30	-0.331861	5.90044e-11
Colon	Stromal cell	chr15:40592238:T:C	cg05111383	-0.826176	5.05629e-34	-0.856252	4.59859e-45	0.416949	1.84499e-17
Colon	Stromal cell	chr15:66699126:C:G	cg04093349	-0.271332	0.00201829	-0.154656	0.0451481	0.541757	2.92162e-13
Colon	Stromal cell	chr15:66714680:C:G	cg11193064	1.19177	5.93805e-59	1.17703	9.86766e-65	-0.283918	7.41824e-12
Colon	Stromal cell	chr15:68230512:G:A	cg22576950	0.184908	0.0013603	0.185505	0.000331391	-0.358239	7.22125e-11
Colon	Stromal cell	chr15:90112341:C:T	cg14940396	0.623785	1.09528e-14	0.5799	2.17325e-17	-0.53807	5.25782e-16
Colon	Stromal cell	chr16:588264:C:G	cg00235270	0.903322	5.21395e-29	0.907511	3.34807e-34	-0.395328	5.08772e-11
Colon	Stromal cell	chr16:937877:A:G	cg00523434	0.525928	5.16524e-18	0.519565	3.17919e-21	-0.347573	2.51701e-11
Colon	Stromal cell	chr16:12572524:C:T	cg01075459	0.0433923	0.681376	-0.0360063	0.682068	0.771801	3.76454e-15
Colon	Stromal cell	chr16:18949732:G:T	cg04547000	-1.11359	1.24428e-44	-1.13574	9.19648e-54	0.411532	1.04965e-13
Colon	Stromal cell	chr16:49494948:TGCCTGTGCTATATTTA:T	cg01566384	0.937328	1.99104e-29	0.976284	4.15011e-37	0.3865	1.80444e-11
Colon	Stromal cell	chr16:88691431:C:T	cg09381666	1.27127	7.75179e-65	1.30534	8.14783e-75	-0.348151	2.6453e-13
Colon	Stromal cell	chr17:836127:G:A	cg03255749	-0.787315	3.69974e-31	-0.83869	2.93925e-44	-0.439601	5.24466e-19
Colon	Stromal cell	chr17:1005655:AAG:A	cg09639964	-0.698263	1.91105e-18	-0.701065	4.02467e-23	0.400322	1.5669e-11
Colon	Stromal cell	chr17:1019470:TCTGCTGCAGGTGTGGCCCTGGTGC:T	cg16096942	-0.274413	3.72131e-05	-0.245455	1.55088e-05	-0.446766	1.10344e-12
Colon	Stromal cell	chr17:1762803:A:G	cg09128350	-0.62979	6.81387e-14	-0.752692	2.85451e-24	0.617972	1.10959e-19
Colon	Stromal cell	chr17:2358383:A:G	cg22235600	0.582885	2.07735e-21	0.580762	2.667e-25	-0.360569	1.17577e-12
Colon	Stromal cell	chr17:3557863:C:T	cg13633262	1.14734	1.17775e-48	1.1087	1.42337e-64	-0.448325	6.83681e-26
Colon	Stromal cell	chr17:3866214:A:G	cg06844165	0.998059	2.86194e-43	0.940881	2.37032e-49	0.365113	4.92698e-16
Colon	Stromal cell	chr17:19668605:GCTTTCCCTAT:G	cg15686419	0.755881	7.1065e-24	0.728157	1.9502e-27	-0.409354	1.94059e-12
Colon	Stromal cell	chr17:32519606:C:G	cg21839984	-0.480476	6.48138e-11	-0.461175	1.36837e-14	0.620633	2.9763e-19
Colon	Stromal cell	chr17:35256683:C:T	cg14806529	0.678081	5.13137e-22	0.697144	4.36655e-27	-0.386839	3.15965e-11
Colon	Stromal cell	chr17:43777129:T:C	cg14832023	0.437505	2.97349e-09	0.512827	2.34662e-16	-0.532573	1.52454e-17
Colon	Stromal cell	chr17:45111523:C:G	cg23165643	-0.840617	2.07619e-31	-0.854685	2.19018e-37	0.333464	4.58565e-11
Colon	Stromal cell	chr17:46108065:T:C	cg10556198	-0.602702	3.38223e-10	-0.693644	3.80947e-15	0.586991	4.03516e-11
Colon	Stromal cell	chr17:46266564:A:G	cg17911788	-0.853733	9.38838e-44	-0.88482	4.63685e-51	0.28817	7.47415e-11
Colon	Stromal cell	chr17:46055704:A:T	cg05159804	-0.995791	5.20645e-45	-1.03167	3.23316e-52	0.324519	1.29456e-10
Colon	Stromal cell	chr17:57596565:G:A	cg26408224	-0.622176	2.04186e-13	-0.63936	7.60517e-19	0.672171	1.17441e-16
Colon	Stromal cell	chr17:63881309:G:T	cg03437883	-1.02441	2.93744e-45	-1.02421	3.63006e-56	-0.341334	9.88217e-17
Colon	Stromal cell	chr17:69961571:G:C	cg13433125	-0.216885	0.00627766	-0.247956	0.000309128	-0.47299	8.44966e-14
Colon	Stromal cell	chr17:81336836:A:G	cg03316658	-0.872253	3.00949e-20	-0.839442	1.33624e-23	-0.472495	1.84446e-11
Colon	Stromal cell	chr17:82124184:A:G	cg23522485	-0.797636	2.42212e-29	-0.784462	3.54497e-34	0.383284	5.22029e-12
Colon	Stromal cell	chr17:82635982:G:A	cg21909206	-0.916322	1.26291e-21	-0.8345	7.86277e-23	0.531214	4.46732e-12
Colon	Stromal cell	chr18:23331390:G:GC	cg07082130	-0.811334	2.49974e-10	-0.929179	3.0504e-15	0.834407	1.84585e-11
Colon	Stromal cell	chr18:37489193:C:T	cg16869349	-1.45431	5.78359e-59	-1.53736	1.44306e-70	-0.335197	3.77992e-14
Colon	Stromal cell	chr18:74482908:A:G	cg15682262	-1.18972	1.06042e-36	-1.24832	3.94591e-46	-0.492959	1.03141e-12
Colon	Stromal cell	chr18:75198732:T:C	cg21786191	-0.733395	8.80161e-33	-0.692796	5.91554e-35	0.295101	5.32633e-11
Colon	Stromal cell	chr19:6722011:G:T	cg04547181	-1.17182	4.16478e-60	-1.15813	1.28235e-70	0.384559	2.54957e-16
Colon	Stromal cell	chr19:6722011:G:T	cg12768975	-1.06516	6.50253e-55	-1.05289	2.20335e-61	0.325806	1.24194e-11
Colon	Stromal cell	chr19:21570233:C:G	cg02997983	0.525832	1.26933e-07	0.514327	6.4182e-09	-0.508997	7.32247e-11
Colon	Stromal cell	chr19:40687675:A:G	cg02757488	1.03944	4.35395e-48	1.03806	1.67231e-58	-0.382468	2.91715e-15
Colon	Stromal cell	chr19:47755569:G:A	cg00028993	0.463518	2.95885e-09	0.45379	3.73353e-11	0.468229	1.62221e-12
Colon	Stromal cell	chr19:56093663:G:C	cg06649663	0.70925	2.33238e-17	0.743924	1.10959e-25	-0.460102	4.13008e-18
Colon	Stromal cell	chr19:56093663:G:C	cg20956548	0.745938	6.28947e-22	0.756175	7.29056e-28	-0.369864	6.04596e-14
Colon	Stromal cell	chr20:13287012:G:T	cg09495909	0.502202	9.3618e-08	0.468409	1.19801e-08	-0.521827	1.98758e-11
Colon	Stromal cell	chr20:35159911:T:C	cg17843510	-1.15779	1.95681e-76	-1.16332	1.1365e-85	-0.226327	2.01751e-12
Colon	Stromal cell	chr20:35956725:T:C	cg16097074	-1.07819	5.81153e-30	-1.05758	5.40569e-34	-0.496262	6.34794e-11
Colon	Stromal cell	chr20:37981113:T:C	cg22625504	0.680396	1.76277e-23	0.711972	4.26737e-30	-0.344736	2.23275e-11
Colon	Stromal cell	chr20:45783928:C:A	cg04940435	1.04532	3.49098e-35	1.06356	3.84104e-42	-0.403654	4.92252e-12
Colon	Stromal cell	chr20:46608476:A:C	cg09766721	0.807116	5.19902e-35	0.832909	6.81479e-44	-0.355294	2.09782e-14
Colon	Stromal cell	chr20:48584971:A:G	cg16987856	0.584614	1.87674e-21	0.577741	4.07576e-26	0.330534	7.37515e-13
Colon	Stromal cell	chr20:62432366:A:G	cg24475058	0.924032	6.77844e-45	0.915199	1.50939e-55	0.343503	8.53207e-17
Colon	Stromal cell	chr21:33042994:C:T	cg00957609	-0.0702597	0.216495	-0.161361	0.000595341	0.484166	6.68387e-19
Colon	Stromal cell	chr21:33278948:T:C	cg25745742	-0.216632	2.79716e-07	-0.192604	2.58765e-07	-0.263185	6.01619e-11
Colon	Stromal cell	chr21:35732069:C:T	cg17829193	0.932482	1.69344e-42	0.934964	3.84822e-49	-0.276585	5.77051e-11
Colon	Stromal cell	chr21:37129712:G:C	cg01329690	-0.905984	5.91115e-51	-0.948575	1.62871e-62	-0.296034	3.34826e-14
Colon	Stromal cell	chr21:42584143:T:C	cg02484746	-0.460193	7.65684e-14	-0.449179	2.03143e-17	0.398578	1.56391e-14
Colon	Stromal cell	chr22:35646939:C:T	cg17347063	1.04497	9.20394e-60	1.07821	1.68371e-70	0.278508	5.70178e-14
Colon	Stromal cell	chr22:35646939:C:T	cg14301048	1.02486	1.06205e-76	1.05094	1.31003e-85	0.182556	6.12595e-11
Whole Blood	B cell	chr1:2196630:A:G	cg04315214	-1.23694	2.0039e-117	-1.24312	7.13181e-125	0.347318	4.16402e-12
Whole Blood	B cell	chr1:9275114:G:T	cg25755851	1.26796	3.99509e-268	1.25289	1.46511e-270	-0.197013	1.43507e-13
Whole Blood	B cell	chr1:12022277:A:T	cg26227417	1.28877	3.46493e-277	1.28434	6.13059e-285	-0.221167	7.69985e-16
Whole Blood	B cell	chr1:15857061:C:A	cg13365314	1.27715	0	1.28418	0	-0.143926	9.43251e-15
Whole Blood	B cell	chr1:22471342:G:A	cg07397757	-1.34604	0	-1.33928	0	0.158287	1.36841e-14
Whole Blood	B cell	chr1:27887770:G:C	cg23691781	1.19391	0	1.19613	0	-0.138305	9.70737e-18
Whole Blood	B cell	chr1:31391336:T:C	cg00597623	1.26217	0	1.26937	0	-0.183161	3.10787e-29
Whole Blood	B cell	chr1:33120598:T:G	cg05127548	-0.947169	1.82835e-166	-0.940185	3.29911e-173	-0.232951	5.46112e-17
Whole Blood	B cell	chr1:43263951:A:C	cg05886987	-0.969108	4.00984e-165	-0.97163	9.41004e-175	0.184833	1.69695e-10
Whole Blood	B cell	chr1:44819976:C:T	cg24643057	1.34117	0	1.35036	0	-0.174083	1.51196e-13
Whole Blood	B cell	chr1:45439711:G:T	cg10186336	-1.09537	0	-1.09282	0	0.107871	6.93324e-14
Whole Blood	B cell	chr1:67145930:G:A	cg01641381	1.18655	0	1.19018	1.03665719413422e-315	-0.151327	1.84216e-11
Whole Blood	B cell	chr1:93758213:A:T	cg06043840	-1.08314	0	-1.08773	0	0.126228	1.4291e-10
Whole Blood	B cell	chr1:94261020:G:A	cg23505604	1.35355	0	1.34941	0	-0.138444	1.53775e-15
Whole Blood	B cell	chr1:165900834:A:C	cg08622435	1.27529	0	1.27376	0	-0.158302	4.67049e-17
Whole Blood	B cell	chr1:169696491:T:C	cg07001450	1.31799	0	1.31624	0	-0.168706	4.54949e-24
Whole Blood	B cell	chr1:182201657:T:C	cg04639761	-0.571765	9.2964e-116	-0.573825	1.23082e-119	-0.145352	6.80669e-11
Whole Blood	B cell	chr1:198622398:G:C	cg15742712	-1.40661	2.3099e-207	-1.43125	9.51896e-223	0.25878	5.86772e-12
Whole Blood	B cell	chr1:200397329:C:T	cg22450933	1.11802	0	1.11561	0	-0.128885	1.62705e-11
Whole Blood	B cell	chr1:206717104:T:C	cg12869809	1.32226	0	1.3212	0	-0.143722	1.85569e-18
Whole Blood	B cell	chr1:206717104:T:C	cg16750106	1.31912	0	1.3182	0	-0.122932	9.74817e-14
Whole Blood	B cell	chr1:225725770:G:A	cg20799095	1.16746	7.30085e-204	1.17877	7.75938e-212	-0.20904	6.63519e-11
Whole Blood	B cell	chr1:227253033:G:A	cg05929471	0.982892	6.36997e-173	1.00093	1.42223e-180	-0.192634	4.17564e-11
Whole Blood	B cell	chr1:228180753:T:C	cg13294652	1.09661	4.40167e-280	1.09752	1.07072e-287	-0.168527	2.9695e-13
Whole Blood	B cell	chr1:235991065:G:T	cg25119497	1.15616	0	1.15798	0	-0.118639	2.20996e-11
Whole Blood	B cell	chr2:9597055:T:C	cg00481035	1.44386	7.90505033345994e-323	1.45667	0	-0.231409	1.73357e-17
Whole Blood	B cell	chr2:24200033:C:T	cg14991251	1.35569	0	1.36226	0	-0.193066	1.18222e-24
Whole Blood	B cell	chr2:28542657:A:G	cg14175802	-1.01354	2.75321e-233	-1.01186	5.09234e-239	0.172833	1.74196e-12
Whole Blood	B cell	chr2:46648895:G:C	cg21054447	1.24155	0	1.24624	0	-0.155897	4.88972e-20
Whole Blood	B cell	chr2:85428868:T:G	cg20652636	1.26848	0	1.26873	0	-0.157786	1.02701e-13
Whole Blood	B cell	chr2:85887129:C:A	cg24819596	1.23735	0	1.23857	0	-0.104806	2.63457e-13
Whole Blood	B cell	chr2:85946739:A:T	cg02436349	1.34985	0	1.34485	0	-0.22083	2.76875e-38
Whole Blood	B cell	chr2:85946739:A:T	cg12808797	1.33215	0	1.32829	0	-0.187272	5.7263e-37
Whole Blood	B cell	chr2:86003936:A:G	cg23687206	1.38595	0	1.39497	0	-0.181266	6.36368e-14
Whole Blood	B cell	chr2:99256116:G:A	cg05043910	1.26857	0	1.27409	0	-0.106233	5.21432e-15
Whole Blood	B cell	chr2:102374753:A:G	cg12278959	1.31245	0	1.3224	0	-0.149561	1.00081e-10
Whole Blood	B cell	chr2:105773234:T:C	cg09152813	-1.23046	0	-1.22496	0	0.147314	6.65465e-14
Whole Blood	B cell	chr2:112089587:C:T	cg18349077	1.33822	0	1.34183	0	-0.135211	1.05614e-23
Whole Blood	B cell	chr2:112089587:C:T	cg26844603	1.34509	0	1.34854	0	-0.124683	2.74313e-18
Whole Blood	B cell	chr2:151303366:G:A	cg04758026	-1.16874	0	-1.16708	0	0.149957	4.84105e-20
Whole Blood	B cell	chr2:168215068:T:C	cg08240917	-1.49664	6.99496e-289	-1.4839	4.47738e-292	0.208161	4.02087e-12
Whole Blood	B cell	chr2:190702815:G:C	cg06524124	1.26442	0	1.27207	0	-0.140349	4.85167e-11
Whole Blood	B cell	chr2:215706757:G:A	cg01889056	1.08367	2.12481e-236	1.0857	2.49304e-242	-0.173087	5.10267e-11
Whole Blood	B cell	chr2:237464253:T:C	cg27144903	-0.9077	1.12303e-272	-0.907774	5.19451e-280	-0.140802	2.36946e-13
Whole Blood	B cell	chr2:241290149:T:C	cg00707741	1.3228	2.00496e-180	1.31404	1.38064e-183	-0.291279	5.56358e-12
Whole Blood	B cell	chr3:32779481:C:G	cg15709265	1.35393	0	1.36263	0	-0.200543	1.22142e-27
Whole Blood	B cell	chr3:38004037:G:A	cg27440986	1.16713	0	1.17731	0	-0.146516	2.39776e-22
Whole Blood	B cell	chr3:43030581:C:T	cg12239580	1.18772	0	1.18898	0	-0.102495	2.66118e-11
Whole Blood	B cell	chr3:61267821:C:T	cg11755914	1.25729	0	1.25908	0	-0.117411	1.03957e-12
Whole Blood	B cell	chr3:69072490:A:G	cg15641710	1.24312	0	1.23683	0	-0.103688	4.84989e-12
Whole Blood	B cell	chr3:102005079:A:C	cg25738505	-1.30737	1.33378422220485e-315	-1.30957	0	0.215751	2.7015e-18
Whole Blood	B cell	chr3:105351012:G:A	cg16339550	1.44776	1.0291e-231	1.45267	7.7379e-238	-0.221756	1.08816e-10
Whole Blood	B cell	chr3:121995544:C:T	cg20356878	1.26343	0	1.27109	0	-0.131221	5.42655e-14
Whole Blood	B cell	chr3:133857880:C:G	cg21435367	1.28215	5.82127e-289	1.27952	6.20278e-298	-0.207588	4.07559e-16
Whole Blood	B cell	chr3:133857880:C:G	cg08071363	1.29774	2.79674e-270	1.29369	2.69758e-277	-0.20953	1.88993e-14
Whole Blood	B cell	chr3:138807752:T:G	cg04362419	-1.11784	9.53529073034016e-310	-1.12392	3.87730663654452e-317	0.138902	8.28906e-11
Whole Blood	B cell	chr3:148965226:A:G	cg14866567	-1.08793	6.04126e-290	-1.08782	4.09897e-298	0.168934	2.65321e-14
Whole Blood	B cell	chr3:158654688:C:T	cg21586613	-0.813214	5.4799e-143	-0.816376	2.46994e-147	0.173467	1.87003e-10
Whole Blood	B cell	chr3:158725304:T:C	cg03673894	1.34414	0	1.33353	0	-0.211408	1.37549e-26
Whole Blood	B cell	chr3:188185144:G:A	cg07757358	0.613545	5.75313e-69	0.620065	1.11201e-73	0.214959	1.18592e-10
Whole Blood	B cell	chr3:194780197:T:C	cg21284822	1.18473	0	1.17934	0	-0.12259	1.98559e-12
Whole Blood	B cell	chr3:194780197:T:C	cg05736869	1.10532	4.73876e-301	1.09498	2.37614398203752e-311	-0.196613	1.42298e-20
Whole Blood	B cell	chr4:596186:G:A	cg18683082	1.18423	7.13386e-147	1.2023	2.92558e-155	-0.326128	2.76444e-14
Whole Blood	B cell	chr4:720131:G:T	cg13941682	1.13435	0	1.14054	0	-0.0876536	1.56489e-10
Whole Blood	B cell	chr4:2488548:G:A	cg18284319	0.515247	4.67782e-70	0.512888	3.03334e-76	0.202635	7.35208e-14
Whole Blood	B cell	chr4:7915347:A:G	cg13534536	-1.31219	4.72963e-198	-1.3047	5.68425e-203	0.267373	7.85071e-15
Whole Blood	B cell	chr4:48468839:T:C	cg08229040	0.414805	8.66935e-37	0.412901	1.0353e-38	-0.200243	1.28819e-10
Whole Blood	B cell	chr4:55894000:G:C	cg11037025	1.31873	0	1.30946	0	-0.18642	2.28285e-18
Whole Blood	B cell	chr4:77117671:A:G	cg12314730	1.17216	0	1.17147	0	-0.136872	1.43537e-11
Whole Blood	B cell	chr4:107991512:A:T	cg13596487	1.54151	0	1.53965	0	-0.182129	6.11369e-13
Whole Blood	B cell	chr5:56564125:A:G	cg01369914	-1.48635	0	-1.48033	0	0.176577	1.83448e-10
Whole Blood	B cell	chr5:56759428:C:T	cg22788141	-1.14122	0	-1.14458	0	-0.106276	2.55862e-12
Whole Blood	B cell	chr5:80070257:T:C	cg20942286	1.26222	0	1.26142	0	-0.178847	6.09821e-18
Whole Blood	B cell	chr5:82043180:A:G	cg15871215	-1.23036	0	-1.2379	0	0.165503	7.146e-23
Whole Blood	B cell	chr5:134020037:T:C	cg18269756	-1.31554	9.98254e-241	-1.33086	3.89034e-258	0.241265	6.83535e-14
Whole Blood	B cell	chr5:134441881:C:T	cg17550329	-0.853858	2.12102e-159	-0.856519	1.07321e-171	-0.19995	1.52837e-13
Whole Blood	B cell	chr5:150494288:G:A	cg12636435	1.20057	0	1.19789	0	-0.193592	1.00456e-21
Whole Blood	B cell	chr5:150504862:G:A	cg17781669	1.0684	5.11199e-254	1.06588	4.79469e-259	-0.15524	7.17336e-11
Whole Blood	B cell	chr6:2228820:T:C	cg22851977	1.33141	0	1.33909	0	-0.205156	5.88285e-31
Whole Blood	B cell	chr6:2227005:C:A	cg12303981	-1.3435	0	-1.34911	0	0.155462	5.23149e-14
Whole Blood	B cell	chr6:8109882:G:A	cg12777182	1.27309	0	1.27616	0	-0.138892	3.02371e-23
Whole Blood	B cell	chr6:12909642:G:A	cg01350636	-1.22622	0	-1.23301	0	0.172111	2.14034e-17
Whole Blood	B cell	chr6:13294634:G:A	cg03351900	0.51296	2.99495e-49	0.512967	4.18812e-54	0.217158	1.38673e-11
Whole Blood	B cell	chr6:13294634:G:A	cg19741112	0.7865	1.64396e-129	0.787297	5.13217e-149	0.182143	7.11364e-12
Whole Blood	B cell	chr6:30171922:G:A	cg08060195	1.15193	8.45221e-175	1.1798	1.90569e-185	-0.242459	8.40731e-14
Whole Blood	B cell	chr6:31082571:A:G	cg00020172	1.23842	0	1.23815	0	-0.157606	5.15145e-26
Whole Blood	B cell	chr6:31413963:A:C	cg12182649	1.2721	0	1.27715	0	-0.169735	3.85699e-30
Whole Blood	B cell	chr6:36675059:G:A	cg01602139	1.23962	3.26226e-237	1.24364	3.43163e-243	-0.19286	1.28702e-10
Whole Blood	B cell	chr6:53726434:A:G	cg26764953	1.23156	5.62481e-273	1.23229	2.84717e-284	-0.227245	1.36259e-18
Whole Blood	B cell	chr6:106353606:A:G	cg20398163	0.955938	6.68691e-138	0.933328	2.01275e-136	-0.238701	1.19455e-12
Whole Blood	B cell	chr6:111843238:A:G	cg21213783	1.28218	1.452e-256	1.29264	1.24417e-275	-0.263274	6.83546e-21
Whole Blood	B cell	chr6:111843110:G:A	cg26846943	1.24746	2.26978e-269	1.25472	6.74792e-278	-0.184985	5.42534e-12
Whole Blood	B cell	chr6:152572117:G:A	cg24658778	1.21078	0	1.21808	0	-0.169807	1.68781e-29
Whole Blood	B cell	chr7:2132820:G:A	cg11078731	-0.680675	3.26694e-98	-0.699841	9.96712e-111	-0.192049	7.47679e-11
Whole Blood	B cell	chr7:2750246:A:C	cg00095626	-1.31207	1.70216e-262	-1.29981	2.4475e-278	0.200906	2.19521e-12
Whole Blood	B cell	chr7:3083053:G:A	cg19095265	-0.137287	1.80823e-05	-0.145601	1.22771e-06	-0.198632	9.48108e-11
Whole Blood	B cell	chr7:22699298:A:G	cg11626929	1.47758	2.45681e-222	1.46756	1.55781e-226	-0.276637	3.03299e-13
Whole Blood	B cell	chr7:24317384:G:A	cg04932937	1.28785	0	1.28621	0	-0.165873	5.00389e-17
Whole Blood	B cell	chr7:37335713:G:A	cg18891815	-1.2929	0	-1.29487	0	0.0959561	6.40888e-11
Whole Blood	B cell	chr7:43618328:C:G	cg10045861	1.26677	0	1.27857	0	-0.165594	1.04912e-13
Whole Blood	B cell	chr7:43619583:G:A	cg12894711	1.26984	0	1.2839	0	-0.192973	9.35657e-24
Whole Blood	B cell	chr7:44095295:A:G	cg00411107	-1.20222	0	-1.20229	0	0.142298	1.52686e-12
Whole Blood	B cell	chr7:47118684:A:G	cg16564132	0.519415	4.32319e-46	0.515684	4.2496e-48	0.226679	9.28247e-11
Whole Blood	B cell	chr7:69770850:C:A	cg10619644	1.23455	0	1.23781	0	-0.138784	8.91414e-15
Whole Blood	B cell	chr7:77327322:G:A	cg06305962	1.23102	0	1.23119	0	-0.13453	2.16008e-17
Whole Blood	B cell	chr7:106953163:C:T	cg00530438	1.54981	0	1.54861	0	-0.164742	4.71061e-11
Whole Blood	B cell	chr7:128709553:G:A	cg10157098	1.32881	0	1.33449	0	-0.131177	1.55459e-13
Whole Blood	B cell	chr7:135165973:G:A	cg08776296	-1.12852	2.80957e-288	-1.12237	3.7287e-293	0.167665	1.32766e-12
Whole Blood	B cell	chr7:150701215:A:T	cg03450844	-1.1684	0	-1.16365	0	-0.148158	1.48238e-13
Whole Blood	B cell	chr8:73800567:G:A	cg12682382	1.63628	0	1.63045	0	-0.19485	1.75918e-13
Whole Blood	B cell	chr8:90504107:A:T	cg22895981	1.22739	0	1.22934	0	-0.131463	3.0738e-13
Whole Blood	B cell	chr8:129383339:A:C	cg15394602	1.29688	0	1.29909	0	-0.140816	1.04294e-12
Whole Blood	B cell	chr8:143926863:T:C	cg19405177	1.18906	0	1.18978	0	-0.117655	1.66522e-12
Whole Blood	B cell	chr9:4141546:T:C	cg11935287	1.233	0	1.2225	0	-0.14019	2.27531e-12
Whole Blood	B cell	chr9:4814948:G:C	cg01429649	-1.14123	3.127e-226	-1.14879	7.81408e-235	0.207221	2.11748e-13
Whole Blood	B cell	chr9:33122628:T:C	cg27012316	1.17919	0	1.1788	0	-0.135572	1.97282e-15
Whole Blood	B cell	chr9:37318679:G:A	cg12008478	1.18579	0	1.17814	0	-0.153443	5.54138e-17
Whole Blood	B cell	chr9:72579150:T:C	cg22154765	1.23994	0	1.24044	0	-0.0894649	4.09731e-10
Whole Blood	B cell	chr9:89404171:A:C	cg08241494	1.35168	7.17203e-189	1.35494	3.02365e-195	-0.262853	3.34042e-13
Whole Blood	B cell	chr9:108785319:T:G	cg13837146	1.25196	0	1.25356	0	-0.127254	1.19716e-14
Whole Blood	B cell	chr9:109316268:A:G	cg14306058	-1.19884	0	-1.20276	0	0.157674	1.33234e-16
Whole Blood	B cell	chr9:117711060:T:C	cg23520270	1.38678	0	1.39232	0	-0.170239	2.66984e-13
Whole Blood	B cell	chr9:126482259:T:C	cg14854723	1.4747	1.79928e-277	1.46421	1.30305e-281	-0.219063	2.47624e-12
Whole Blood	B cell	chr9:136127521:G:A	cg13808574	1.15591	3.09391e-283	1.14895	1.26946e-287	-0.16958	5.49797e-13
Whole Blood	B cell	chr10:1254917:T:G	cg12429939	-0.677542	3.44907e-101	-0.684518	1.45498e-114	-0.211728	6.29181e-15
Whole Blood	B cell	chr10:3111553:T:C	cg10099524	0.451228	1.67997e-49	0.445365	7.11162e-52	0.195325	2.42947e-12
Whole Blood	B cell	chr10:3311489:G:A	cg12890133	-1.39105	0	-1.39175	0	0.204796	9.44199e-16
Whole Blood	B cell	chr10:5920298:C:T	cg23651704	-0.00238641	0.960043	-0.0192823	0.6725	0.311569	1.72497e-12
Whole Blood	B cell	chr10:6432769:T:A	cg01856692	1.55798	1.50333306585283e-318	1.56958	0	-0.201124	2.96521e-13
Whole Blood	B cell	chr10:11640397:C:T	cg07245057	1.5078	0	1.50429	0	-0.226646	2.35044e-18
Whole Blood	B cell	chr10:28324583:A:T	cg09294573	1.57578	0	1.57534	0	-0.142324	6.05981e-11
Whole Blood	B cell	chr10:45236235:C:G	cg07678448	1.15485	0	1.1476	0	-0.129818	9.05746e-17
Whole Blood	B cell	chr10:46292902:G:C	cg10430941	1.03777	4.3156e-269	1.04112	3.0241e-277	-0.150896	6.19988e-12
Whole Blood	B cell	chr10:48330565:A:G	cg14436939	1.21235	0	1.21737	0	-0.124971	7.87178e-15
Whole Blood	B cell	chr10:68718022:A:C	cg02179936	1.367	0	1.3764	0	-0.20456	5.28712e-25
Whole Blood	B cell	chr10:75476920:T:C	cg12829045	1.36669	0	1.37327	0	-0.149238	5.38421e-11
Whole Blood	B cell	chr10:78750213:C:T	cg00845968	1.19398	0	1.19971	0	-0.14934	5.62747e-15
Whole Blood	B cell	chr10:79224029:C:A	cg06073814	1.17058	0	1.17825	0	-0.135383	3.94001e-15
Whole Blood	B cell	chr10:79470203:G:A	cg09959332	0.684695	9.59245e-105	0.688132	3.97196e-120	0.220143	5.78297e-17
Whole Blood	B cell	chr10:79879515:T:G	cg17139988	0.534186	1.37019e-39	0.549446	5.98762e-48	0.279989	1.67014e-13
Whole Blood	B cell	chr10:106992449:T:C	cg24795173	1.33911	0	1.33909	0	-0.127651	2.90496e-15
Whole Blood	B cell	chr10:113554359:G:A	cg10515708	-0.161275	5.12431e-07	-0.149241	1.5398e-06	-0.244026	2.18615e-14
Whole Blood	B cell	chr10:114825350:T:C	cg19990189	1.12813	0	1.13225	0	-0.13348	1.58086e-12
Whole Blood	B cell	chr10:121447784:C:T	cg25409939	1.18472	0	1.18595	0	-0.133668	6.09076e-12
Whole Blood	B cell	chr10:123392419:A:C	cg08491197	-0.346496	2.48798e-16	-0.316133	3.40464e-14	-0.292108	4.3233e-11
Whole Blood	B cell	chr10:126136350:C:T	cg13674437	1.24572	0	1.24598	0	-0.10372	1.97457e-10
Whole Blood	B cell	chr11:5440855:G:A	cg12839166	1.27488	0	1.27143	0	-0.157461	2.83215e-18
Whole Blood	B cell	chr11:33012267:C:G	cg00959864	1.23601	0	1.24211	0	-0.109321	1.07127e-12
Whole Blood	B cell	chr11:72729079:C:G	cg18680957	-1.58238	7.71909e-247	-1.58533	6.6354e-260	0.299709	4.95928e-16
Whole Blood	B cell	chr11:72745665:G:C	cg10317600	1.37967	1.45881e-214	1.3783	4.10881e-221	-0.278807	2.38006e-14
Whole Blood	B cell	chr11:73940617:C:T	cg21449673	1.33221	0	1.35171	0	-0.220029	1.26407e-30
Whole Blood	B cell	chr11:112161526:C:T	cg06646484	1.30561	3.16202013338398e-321	1.32144	0	-0.16989	2.00349e-14
Whole Blood	B cell	chr12:3962735:T:G	cg15945527	1.23734	0	1.24259	0	-0.134888	6.6495e-12
Whole Blood	B cell	chr12:7709000:C:T	cg20927656	-1.12197	2.04124e-243	-1.11531	2.37405e-247	0.182469	4.74944e-12
Whole Blood	B cell	chr12:7756264:C:T	cg07195891	-1.24429	0	-1.24267	0	0.225021	3.25211e-27
Whole Blood	B cell	chr12:9736561:A:G	cg24191225	-1.21148	0	-1.21569	0	0.114481	1.20047e-12
Whole Blood	B cell	chr12:31668531:G:A	cg23008279	1.50339	0	1.50296	0	-0.207966	8.46667e-15
Whole Blood	B cell	chr12:47356698:T:C	cg04259259	1.1985	0	1.1983	0	-0.154214	5.03561e-16
Whole Blood	B cell	chr12:51816202:G:A	cg00549601	1.11384	3.75802140327519e-317	1.11339	0	-0.149451	5.11678e-13
Whole Blood	B cell	chr12:54465833:A:G	cg13810988	1.17593	4.48562e-203	1.16876	7.17578e-206	-0.20269	1.29395e-10
Whole Blood	B cell	chr12:96950281:C:T	cg00481382	-1.22334	0	-1.22902	0	0.136201	3.16395e-13
Whole Blood	B cell	chr12:96951080:C:T	cg23174406	-1.22503	0	-1.23132	0	0.150712	1.5772e-16
Whole Blood	B cell	chr12:104091026:G:A	cg21050282	1.30681	0	1.31784	0	-0.157603	2.27046e-14
Whole Blood	B cell	chr12:110048059:A:G	cg12870014	1.41677	0	1.4127	0	-0.23832	1.66046e-31
Whole Blood	B cell	chr12:121914731:G:A	cg24540763	1.31452	0	1.31972	0	-0.131649	1.08051e-13
Whole Blood	B cell	chr12:123990609:A:G	cg25459280	1.35606	0	1.35431	0	-0.165728	2.43548e-22
Whole Blood	B cell	chr12:132686336:C:G	cg11808531	1.16461	0	1.17212	0	-0.162788	5.47896e-16
Whole Blood	B cell	chr12:132686336:C:G	cg01462207	1.18913	0	1.19445	0	-0.123827	2.60138e-12
Whole Blood	B cell	chr13:21411149:C:T	cg17521450	1.21545	0	1.21119	0	-0.123079	2.44327e-12
Whole Blood	B cell	chr13:31092808:C:T	cg24989176	1.19872	0	1.20076	0	-0.149785	2.50112e-16
Whole Blood	B cell	chr13:33260291:G:A	cg15234627	1.4565	0	1.47855	0	-0.224223	3.69159e-27
Whole Blood	B cell	chr13:46520002:C:T	cg04315865	0.972316	7.42567e-295	0.97368	3.56453e-302	-0.130499	7.67046e-12
Whole Blood	B cell	chr13:49531569:G:A	cg17487741	0.819968	7.68809e-141	0.834082	1.73239e-169	-0.163246	1.29337e-10
Whole Blood	B cell	chr13:49838937:T:C	cg19544767	-1.24187	0	-1.2471	0	0.136563	8.3026e-16
Whole Blood	B cell	chr13:100607173:A:G	cg17474649	1.34385	0	1.35526	0	-0.172839	7.88765e-15
Whole Blood	B cell	chr13:114041265:C:A	cg12938556	-0.335166	2.20349e-37	-0.322336	6.85766e-41	-0.225781	2.39514e-20
Whole Blood	B cell	chr13:114134675:T:C	cg06611532	-1.22591	0	-1.22433	0	0.142355	3.49112e-18
Whole Blood	B cell	chr14:58572450:G:A	cg14832378	-1.23912	0	-1.23137	0	0.161164	1.9741e-12
Whole Blood	B cell	chr14:59407395:C:T	cg11247712	1.18904	0	1.18396	0	-0.148372	8.57654e-33
Whole Blood	B cell	chr14:65012230:T:G	cg20518516	0.881459	1.76126e-99	0.874317	7.17248e-102	-0.301767	2.86475e-14
Whole Blood	B cell	chr14:76904569:T:C	cg13246055	1.3896	0	1.3941	0	-0.187379	2.89422e-27
Whole Blood	B cell	chr14:89347559:G:A	cg02073796	-1.19627	0	-1.19766	0	0.0994015	5.78245e-11
Whole Blood	B cell	chr14:89391381:T:C	cg18590814	1.37726	0	1.37027	0	-0.169581	1.86369e-11
Whole Blood	B cell	chr14:90101683:G:C	cg23207176	1.29503	0	1.30189	0	-0.157417	8.83369e-19
Whole Blood	B cell	chr14:90775636:T:C	cg06209906	1.11624	9.54716e-227	1.11407	6.04088e-233	-0.209665	9.81686e-14
Whole Blood	B cell	chr14:91889368:T:G	cg18375974	0.994219	5.99865e-158	1.01113	3.17206e-165	-0.199066	1.12799e-10
Whole Blood	B cell	chr14:100651112:T:C	cg00992253	1.24695	0	1.24893	0	-0.0956976	7.66291e-12
Whole Blood	B cell	chr14:104660675:C:T	cg16761754	1.28396	1.18384e-242	1.28602	3.95565e-253	-0.185231	9.6567e-11
Whole Blood	B cell	chr15:40137571:G:A	cg06926377	1.14685	2.74648e-306	1.14823	3.09102026255655e-313	-0.147869	9.15155e-12
Whole Blood	B cell	chr15:40806141:C:T	cg03012280	1.28307	0	1.28382	0	-0.169182	6.01425e-31
Whole Blood	B cell	chr15:48557531:C:T	cg05697527	1.2072	0	1.22124	0	-0.139122	1.06299e-17
Whole Blood	B cell	chr15:51754516:A:G	cg02253142	-0.983521	0	-0.985434	0	-0.107352	2.64861e-14
Whole Blood	B cell	chr15:63595914:C:T	cg16619994	1.2766	0	1.26975	0	-0.126247	5.2589e-12
Whole Blood	B cell	chr15:80702997:C:T	cg19623359	-1.25422	1.33089e-233	-1.25086	2.16292e-238	0.197753	2.05364e-11
Whole Blood	B cell	chr15:89069996:T:G	cg22446784	1.28178	0	1.2831	0	-0.149208	9.1793e-30
Whole Blood	B cell	chr15:90437748:C:T	cg13976007	-0.49416	2.52471e-38	-0.501932	2.37724e-42	0.305068	5.17286e-17
Whole Blood	B cell	chr15:92590467:T:C	cg03847675	1.42792	1.9224e-299	1.43197	1.50061e-306	-0.202193	7.0041e-11
Whole Blood	B cell	chr15:99072692:T:G	cg03203706	1.30451	6.05823294930537e-320	1.3122	0	-0.157519	1.41689e-10
Whole Blood	B cell	chr16:3669343:C:T	cg12359832	-1.13201	6.86623e-295	-1.1323	1.05044e-300	0.142761	1.28756e-10
Whole Blood	B cell	chr16:8922767:C:T	cg13828458	1.01265	2.95746e-301	1.00655	0	-0.154458	3.01347e-15
Whole Blood	B cell	chr16:66596649:A:G	cg03448915	-1.08851	3.34823e-207	-1.10556	1.67452e-216	0.209171	9.59767e-13
Whole Blood	B cell	chr16:68034724:A:G	cg02184558	1.39615	0	1.38858	0	-0.140394	9.5037e-10
Whole Blood	B cell	chr16:78877429:C:T	cg03660162	-1.28879	0	-1.29513	0	0.118252	2.20119e-13
Whole Blood	B cell	chr16:82158361:T:C	cg13488542	1.20729	0	1.20772	0	-0.154206	9.06858e-15
Whole Blood	B cell	chr17:601889:A:C	cg08889023	1.49387	0	1.50715	0	-0.245105	2.86173e-23
Whole Blood	B cell	chr17:5221582:C:T	cg07107105	1.28339	9.35918e-298	1.27735	3.72683e-302	-0.168509	3.94509e-11
Whole Blood	B cell	chr17:35901470:C:T	cg09536176	1.51093	5.45746e-297	1.50157	2.63539e-307	-0.295197	1.63694e-19
Whole Blood	B cell	chr17:39973253:G:A	cg21230266	1.23038	0	1.23628	0	-0.114446	6.42562e-11
Whole Blood	B cell	chr17:43160842:T:C	cg14648161	-1.03852	0	-1.03932	0	0.11591	2.50118e-10
Whole Blood	B cell	chr17:58779233:T:A	cg15994330	1.008	2.50276e-297	1.00157	2.23869e-301	-0.143162	2.16769e-12
Whole Blood	B cell	chr17:65907853:C:A	cg02044966	0.00893649	0.742574	-0.0100952	0.7044	0.206578	2.99354e-15
Whole Blood	B cell	chr17:67154435:A:T	cg15831967	1.37794	0	1.38415	0	-0.181768	2.11188e-13
Whole Blood	B cell	chr17:80938554:T:C	cg11949518	1.2338	0	1.22971	0	-0.136368	7.60911e-16
Whole Blood	B cell	chr18:6337490:T:G	cg00451011	-1.2296	0	-1.23071	0	-0.143719	3.56813e-14
Whole Blood	B cell	chr18:8238254:C:T	cg20071505	1.21314	7.63517e-213	1.2254	1.82406e-220	-0.195531	3.43991e-11
Whole Blood	B cell	chr18:45853582:C:G	cg20995897	-0.548778	3.50096e-72	-0.563605	1.10887e-85	0.184283	9.09163e-13
Whole Blood	B cell	chr18:48755227:A:T	cg17496939	1.4493	4.454947406833e-310	1.42856	5.65211098842386e-321	-0.283841	6.191e-26
Whole Blood	B cell	chr18:79465777:C:T	cg16308790	-1.20912	3.8685e-215	-1.19267	2.78729e-237	0.270981	1.1698e-19
Whole Blood	B cell	chr18:79504442:C:T	cg21192698	0.455651	1.01599e-45	0.469033	7.92301e-52	0.213383	5.3284e-12
Whole Blood	B cell	chr19:32977504:C:A	cg18210893	1.37482	9.83687e-303	1.3761	1.77630388912382e-311	-0.196623	3.66994e-13
Whole Blood	B cell	chr19:38557523:C:A	cg03181524	1.20784	0	1.21098	0	-0.118473	4.75907e-11
Whole Blood	B cell	chr19:51477630:T:C	cg12550569	1.36626	0	1.35404	0	-0.184726	9.7333e-14
Whole Blood	B cell	chr19:51477630:T:C	cg22110428	1.44647	0	1.43334	0	-0.199997	9.17874e-19
Whole Blood	B cell	chr20:1492054:T:C	cg00572387	1.22356	0	1.23144	0	-0.10498	3.86761e-11
Whole Blood	B cell	chr20:3639751:T:C	cg05179723	1.47872	7.14953e-285	1.4924	1.64802e-297	-0.242586	3.55322e-16
Whole Blood	B cell	chr20:5783359:C:G	cg05897505	0.78856	2.18092e-154	0.804316	1.8137e-163	-0.176295	1.13828e-11
Whole Blood	B cell	chr20:33004989:T:C	cg08642068	1.40145	0	1.40971	0	-0.164067	2.85254e-10
Whole Blood	B cell	chr20:49066356:C:T	cg11749817	1.14673	0	1.1479	0	-0.0977664	2.57742e-11
Whole Blood	B cell	chr20:52411966:T:C	cg24871213	1.23951	0	1.23943	0	-0.126822	8.24782e-14
Whole Blood	B cell	chr21:29177040:G:T	cg15135067	1.3145	0	1.31494	0	-0.1877	2.02102e-24
Whole Blood	B cell	chr21:42141330:T:C	cg09727148	1.1332	0	1.13447	0	0.144384	4.35307e-14
Whole Blood	B cell	chr21:44954314:T:C	cg16087098	1.17177	9.2954e-270	1.18337	2.26734e-285	-0.217175	7.08285e-21
Whole Blood	B cell	chr22:29912791:G:C	cg26167301	1.45905	0	1.47151	0	-0.17024	2.67114e-14
Whole Blood	B cell	chr22:30001357:T:C	cg13250067	-1.42234	0	-1.40657	0	0.215861	1.86511e-21
Whole Blood	B cell	chr22:31252308:C:T	cg24989447	-1.24518	0	-1.24933	0	0.104885	1.4792e-10
Whole Blood	B cell	chr22:44604826:C:T	cg24322358	1.17238	0	1.1648	0	-0.138098	4.02308e-11
Whole Blood	B cell	chr22:50076841:T:C	cg08220243	1.27283	0	1.26526	0	-0.203579	1.1121e-20
Whole Blood	B cell	chr22:50068665:T:C	cg01419035	1.32879	0	1.31997	0	-0.14657	2.79284e-15
Whole Blood	CD4+ T Cell	chr1:6554170:G:A	cg19757108	1.19458	1.31076e-226	1.20448	3.81993e-250	0.212606	2.69497e-14
Whole Blood	CD4+ T Cell	chr1:9275268:C:G	cg25755851	1.26963	2.7344e-268	1.26041	2.96025e-272	-0.177041	1.34709e-10
Whole Blood	CD4+ T Cell	chr1:22511356:C:T	cg07397757	-1.29941	0	-1.29558	0	0.149256	2.10775e-12
Whole Blood	CD4+ T Cell	chr1:27887770:G:C	cg23691781	1.19391	0	1.19002	0	-0.123613	1.22281e-13
Whole Blood	CD4+ T Cell	chr1:31391336:T:C	cg00597623	1.26217	0	1.2589	0	-0.142933	1.09087e-16
Whole Blood	CD4+ T Cell	chr1:45436734:T:C	cg10186336	-1.09829	0	-1.09675	0	0.089262	1.76676e-10
Whole Blood	CD4+ T Cell	chr1:94261020:G:A	cg23505604	1.35355	0	1.35815	0	-0.166761	1.76425e-22
Whole Blood	CD4+ T Cell	chr1:150639481:A:G	cg18016565	-0.617808	4.19581e-123	-0.609475	4.66434e-123	0.144561	2.39449e-10
Whole Blood	CD4+ T Cell	chr1:167458320:G:A	cg18469283	-0.814185	6.67204e-120	-0.829128	4.1671e-129	0.211284	1.32461e-12
Whole Blood	CD4+ T Cell	chr1:169696491:T:C	cg07001450	1.31799	0	1.31745	0	-0.130395	8.12007e-16
Whole Blood	CD4+ T Cell	chr1:175053071:G:C	cg23658987	1.19893	8.01392e-234	1.18822	5.83818e-236	-0.189457	2.62368e-11
Whole Blood	CD4+ T Cell	chr1:206717104:T:C	cg12869809	1.32226	0	1.32391	0	-0.112628	1.43607e-10
Whole Blood	CD4+ T Cell	chr1:206717104:T:C	cg16750106	1.31912	0	1.32197	0	-0.110475	3.7424e-10
Whole Blood	CD4+ T Cell	chr1:228224607:G:A	cg13294652	1.18023	0	1.18774	0	-0.136387	3.64972e-12
Whole Blood	CD4+ T Cell	chr2:9601334:C:T	cg00481035	1.46088	9.88131291682493e-323	1.46802	0	-0.184917	2.80675e-11
Whole Blood	CD4+ T Cell	chr2:24286501:T:C	cg14991251	1.34497	0	1.35679	0	-0.176354	3.39589e-18
Whole Blood	CD4+ T Cell	chr2:42053787:C:T	cg19522960	1.25603	5.2845e-308	1.26011	1.23105744095488e-317	-0.183207	1.49249e-14
Whole Blood	CD4+ T Cell	chr2:46648895:G:C	cg21054447	1.24155	0	1.25063	0	-0.112527	5.51281e-13
Whole Blood	CD4+ T Cell	chr2:60357565:A:G	cg07298397	1.26016	0	1.25955	0	-0.146326	1.51159e-11
Whole Blood	CD4+ T Cell	chr2:69953139:C:G	cg09023124	0.967754	2.08022e-263	0.970563	1.17445e-269	-0.140387	5.18371e-11
Whole Blood	CD4+ T Cell	chr2:85887129:C:A	cg24819596	1.23735	0	1.23774	0	-0.106028	1.71311e-13
Whole Blood	CD4+ T Cell	chr2:85951845:T:A	cg02436349	1.34282	0	1.33722	0	-0.1846	7.88104e-25
Whole Blood	CD4+ T Cell	chr2:85951845:T:A	cg12808797	1.32809	0	1.32453	0	-0.121364	3.46675e-15
Whole Blood	CD4+ T Cell	chr2:86149351:T:C	cg14017402	0.561344	1.66937e-82	0.555611	7.20436e-84	0.178313	8.49507e-11
Whole Blood	CD4+ T Cell	chr2:85999274:T:C	cg23687206	1.38595	0	1.40309	0	-0.141888	9.59909e-11
Whole Blood	CD4+ T Cell	chr2:99256116:G:A	cg05043910	1.26857	0	1.28312	0	-0.11882	1.05452e-18
Whole Blood	CD4+ T Cell	chr2:102411180:T:C	cg12278959	1.2843	0	1.30488	0	-0.209235	4.48407e-21
Whole Blood	CD4+ T Cell	chr2:112089587:C:T	cg18349077	1.33822	0	1.34145	0	-0.133653	6.56932e-24
Whole Blood	CD4+ T Cell	chr2:112089587:C:T	cg26844603	1.34509	0	1.34779	0	-0.11303	1.02557e-15
Whole Blood	CD4+ T Cell	chr2:151303366:G:A	cg04758026	-1.16874	0	-1.1708	0	0.137746	1.95792e-18
Whole Blood	CD4+ T Cell	chr2:190702815:G:C	cg06524124	1.26442	0	1.26947	0	-0.165392	9.79189e-15
Whole Blood	CD4+ T Cell	chr2:231675992:T:C	cg25726182	1.13148	0	1.13557	0	-0.123849	2.03294e-10
Whole Blood	CD4+ T Cell	chr3:32759045:A:G	cg15709265	1.36881	0	1.3733	0	-0.180956	7.46717e-24
Whole Blood	CD4+ T Cell	chr3:63831754:G:C	cg22134162	-1.07919	1.69719e-167	-1.06126	1.01463e-166	-0.23261	3.57514e-11
Whole Blood	CD4+ T Cell	chr3:69072692:T:C	cg15641710	1.245	0	1.24777	0	-0.103148	3.03179e-12
Whole Blood	CD4+ T Cell	chr3:102040350:T:C	cg25738505	-1.30281	3.65608577922522e-322	-1.31503	0	0.1801	1.14614e-14
Whole Blood	CD4+ T Cell	chr3:133861256:T:C	cg21435367	1.27155	2.75532e-284	1.27436	2.26346e-294	-0.219753	1.34992e-16
Whole Blood	CD4+ T Cell	chr3:133861256:T:C	cg08071363	1.28993	3.19127e-268	1.29495	1.31778e-277	-0.219	1.04361e-14
Whole Blood	CD4+ T Cell	chr3:158717585:C:T	cg03673894	1.35346	0	1.34876	0	-0.217861	1.06176e-28
Whole Blood	CD4+ T Cell	chr4:622971:T:C	cg18683082	1.07631	5.50418e-128	1.11248	4.70507e-137	-0.283989	1.53379e-12
Whole Blood	CD4+ T Cell	chr4:720131:G:T	cg13941682	1.13435	0	1.13536	0	-0.0905317	1.54254e-11
Whole Blood	CD4+ T Cell	chr4:54139806:A:G	cg02500748	1.33094	0	1.33341	0	-0.129841	6.03334e-13
Whole Blood	CD4+ T Cell	chr4:55849341:G:C	cg11037025	1.33162	0	1.33105	0	-0.15588	4.71443e-15
Whole Blood	CD4+ T Cell	chr4:82965269:G:A	cg10806175	1.33532	0	1.34214	0	-0.127929	8.10047e-14
Whole Blood	CD4+ T Cell	chr5:56742321:C:A	cg22788141	-1.14209	0	-1.14059	0	-0.107489	2.0012e-15
Whole Blood	CD4+ T Cell	chr5:80070257:T:C	cg20942286	1.26222	0	1.25976	0	-0.131	1.03689e-10
Whole Blood	CD4+ T Cell	chr5:82043180:A:G	cg15871215	-1.23036	0	-1.22922	0	0.161156	6.88279e-22
Whole Blood	CD4+ T Cell	chr5:150489307:T:C	cg12636435	1.20339	0	1.20672	0	-0.182079	1.14265e-19
Whole Blood	CD4+ T Cell	chr5:150480627:A:G	cg17781669	1.06962	5.13148e-260	1.06871	1.4231e-265	-0.152374	7.13852e-11
Whole Blood	CD4+ T Cell	chr5:172888069:C:A	cg13582457	1.09044	3.04304e-283	1.08886	5.65449e-289	-0.147253	1.08123e-11
Whole Blood	CD4+ T Cell	chr5:181199036:G:C	cg09023811	0.374526	1.75096e-14	0.380261	2.61922e-15	-0.330771	1.40201e-10
Whole Blood	CD4+ T Cell	chr6:2228820:T:C	cg22851977	1.33141	0	1.32603	0	-0.161468	5.00364e-19
Whole Blood	CD4+ T Cell	chr6:2248441:C:T	cg12303981	-1.3043	0	-1.30089	0	0.155343	5.85885e-12
Whole Blood	CD4+ T Cell	chr6:8109882:G:A	cg12777182	1.27309	0	1.27169	0	-0.120172	4.07424e-17
Whole Blood	CD4+ T Cell	chr6:12909642:G:A	cg01350636	-1.22622	0	-1.22832	0	0.136352	7.27671e-13
Whole Blood	CD4+ T Cell	chr6:14782979:A:G	cg01936132	1.2225	1.93821e-306	1.22102	7.07950401038467e-315	-0.155889	1.20494e-12
Whole Blood	CD4+ T Cell	chr6:31082571:A:G	cg00020172	1.23842	0	1.24093	0	-0.154952	7.10748e-25
Whole Blood	CD4+ T Cell	chr6:31414359:C:T	cg12182649	1.27319	0	1.2797	0	-0.151096	1.02662e-24
Whole Blood	CD4+ T Cell	chr6:152572117:G:A	cg24658778	1.21078	0	1.21277	0	-0.140602	9.93527e-20
Whole Blood	CD4+ T Cell	chr7:24317376:T:C	cg04932937	1.28785	0	1.29121	0	-0.145739	6.64957e-15
Whole Blood	CD4+ T Cell	chr7:43618453:G:A	cg12894711	1.27223	0	1.27354	0	-0.154571	3.51559e-16
Whole Blood	CD4+ T Cell	chr7:69772770:G:A	cg10619644	1.23455	0	1.23635	0	-0.116604	2.09631e-10
Whole Blood	CD4+ T Cell	chr7:77327322:G:A	cg06305962	1.23102	0	1.23575	0	-0.105366	1.2705e-11
Whole Blood	CD4+ T Cell	chr7:98216401:G:A	cg03626541	1.1375	6.00617e-212	1.13374	6.1376e-216	-0.184941	1.8665e-10
Whole Blood	CD4+ T Cell	chr7:105908865:C:T	cg02236157	1.01382	1.27285e-236	1.01176	2.29459e-246	0.163429	3.85439e-12
Whole Blood	CD4+ T Cell	chr7:106958904:G:C	cg00530438	1.51879	0	1.53115	0	-0.196934	1.1023e-13
Whole Blood	CD4+ T Cell	chr7:158737013:G:A	cg03803940	1.24201	0	1.23957	0	-0.0807341	6.42734e-11
Whole Blood	CD4+ T Cell	chr8:18067642:C:T	cg04390231	0.970294	5.18531423705574e-310	0.973236	9.16587918210193e-317	-0.123663	1.00783e-11
Whole Blood	CD4+ T Cell	chr8:73838557:A:G	cg12682382	1.48194	6.43456e-302	1.47878	1.02806e-306	-0.187279	1.92045e-10
Whole Blood	CD4+ T Cell	chr8:129383339:A:C	cg15394602	1.29688	0	1.29847	0	-0.159062	4.13157e-16
Whole Blood	CD4+ T Cell	chr8:143946468:G:A	cg02331830	-1.25866	0	-1.25875	0	0.125861	4.3154e-13
Whole Blood	CD4+ T Cell	chr9:4129611:T:A	cg11935287	1.21761	0	1.20841	0	-0.14468	3.04546e-12
Whole Blood	CD4+ T Cell	chr9:21418372:C:T	cg07328369	-0.424341	4.38684e-44	-0.417782	8.09438e-45	0.211187	1.47533e-13
Whole Blood	CD4+ T Cell	chr9:33129841:A:G	cg27012316	1.19602	0	1.19315	0	-0.116662	8.37977e-13
Whole Blood	CD4+ T Cell	chr9:108785319:T:G	cg13837146	1.25196	0	1.25083	0	-0.121576	8.90333e-13
Whole Blood	CD4+ T Cell	chr9:117711060:T:C	cg23520270	1.38678	0	1.39087	0	-0.197905	1.31336e-17
Whole Blood	CD4+ T Cell	chr9:124281856:G:C	cg13512951	-0.881749	2.03155e-221	-0.88746	2.36262e-228	0.151006	3.34312e-11
Whole Blood	CD4+ T Cell	chr9:126482259:T:C	cg14854723	1.4747	1.79928e-277	1.4785	6.94083e-285	-0.207003	6.57225e-12
Whole Blood	CD4+ T Cell	chr10:3318666:C:A	cg12890133	-1.3952	0	-1.39309	0	0.188621	3.9049e-14
Whole Blood	CD4+ T Cell	chr10:7085114:A:G	cg22880183	1.00138	0	0.996018	0	-0.114511	5.44808e-11
Whole Blood	CD4+ T Cell	chr10:11640397:C:T	cg07245057	1.5078	0	1.49347	0	-0.15853	6.64343e-11
Whole Blood	CD4+ T Cell	chr10:28324583:A:T	cg09294573	1.57578	0	1.58394	0	-0.149956	7.29073e-12
Whole Blood	CD4+ T Cell	chr10:45236235:C:G	cg07678448	1.15485	0	1.14579	0	-0.118088	7.57625e-14
Whole Blood	CD4+ T Cell	chr10:48383413:G:A	cg14436939	1.1684	0	1.16782	0	-0.133925	2.65862e-14
Whole Blood	CD4+ T Cell	chr10:68714604:A:C	cg02179936	1.367	0	1.35581	0	-0.14424	3.11851e-12
Whole Blood	CD4+ T Cell	chr10:75476920:T:C	cg12829045	1.36669	0	1.36786	0	-0.180224	1.48935e-15
Whole Blood	CD4+ T Cell	chr10:78750213:C:T	cg00845968	1.19398	0	1.19667	0	-0.125895	8.8015e-11
Whole Blood	CD4+ T Cell	chr10:79213690:G:T	cg06073814	1.13923	0	1.14264	0	-0.11962	7.04326e-12
Whole Blood	CD4+ T Cell	chr10:94413547:C:T	cg10751070	1.32709	0	1.33186	0	-0.165572	4.72072e-12
Whole Blood	CD4+ T Cell	chr10:103092409:T:G	cg18882449	-1.18482	1.12124e-249	-1.18615	6.95241e-256	0.175432	1.26422e-11
Whole Blood	CD4+ T Cell	chr10:106993621:T:C	cg24795173	1.33468	0	1.33199	0	-0.106674	4.98767e-11
Whole Blood	CD4+ T Cell	chr10:121448643:C:A	cg25409939	1.18472	0	1.18454	0	-0.136292	3.74852e-13
Whole Blood	CD4+ T Cell	chr11:705535:C:T	cg25642616	-0.133833	2.16889e-06	-0.153567	2.18349e-08	-0.175415	1.01164e-10
Whole Blood	CD4+ T Cell	chr11:5440855:G:A	cg12839166	1.27488	0	1.27023	0	-0.12978	8.84603e-14
Whole Blood	CD4+ T Cell	chr11:12046419:G:C	cg04187899	0.847531	1.01365e-94	0.847362	9.89328e-98	-0.256618	8.57778e-12
Whole Blood	CD4+ T Cell	chr11:73954733:A:C	cg21449673	1.29057	7.52252e-308	1.29519	1.22528280168629e-321	-0.21601	1.16217e-18
Whole Blood	CD4+ T Cell	chr12:7756264:C:T	cg07195891	-1.24429	0	-1.24544	0	0.16931	4.42976e-16
Whole Blood	CD4+ T Cell	chr12:14941004:C:A	cg05727432	-1.15424	5.0829e-307	-1.15108	7.7576943326613e-313	-0.150716	2.16429e-11
Whole Blood	CD4+ T Cell	chr12:15571220:G:A	cg14101998	1.124	0	1.128	0	-0.133438	4.2595e-11
Whole Blood	CD4+ T Cell	chr12:31715452:C:T	cg23008279	1.59904	0	1.59075	0	-0.170045	1.88785e-11
Whole Blood	CD4+ T Cell	chr12:47352019:A:G	cg04259259	1.15507	0	1.15738	0	-0.188699	2.77967e-20
Whole Blood	CD4+ T Cell	chr12:96950281:C:T	cg23174406	-1.22503	0	-1.22622	0	0.129867	1.50283e-12
Whole Blood	CD4+ T Cell	chr12:110020727:A:G	cg12870014	1.41308	0	1.40798	0	-0.190447	3.78722e-21
Whole Blood	CD4+ T Cell	chr12:121936607:C:G	cg24540763	1.33288	0	1.33867	0	-0.108169	3.55699e-11
Whole Blood	CD4+ T Cell	chr13:31093547:T:C	cg24989176	1.19992	0	1.20579	0	-0.120194	6.95188e-11
Whole Blood	CD4+ T Cell	chr13:33260291:G:A	cg15234627	1.4565	0	1.46767	0	-0.182219	5.11291e-19
Whole Blood	CD4+ T Cell	chr13:44313106:T:G	cg25374269	1.05563	1.31947e-248	1.0607	3.82867e-256	-0.157386	2.05199e-11
Whole Blood	CD4+ T Cell	chr13:48901644:A:G	cg12709329	1.3762	0	1.37764	0	-0.136255	2.04893e-12
Whole Blood	CD4+ T Cell	chr13:100607173:A:G	cg17474649	1.34385	0	1.34677	0	-0.150174	2.9954e-11
Whole Blood	CD4+ T Cell	chr14:39234120:A:G	cg24603941	-1.11689	2.20072e-305	-1.11837	7.37887829999794e-313	0.140924	1.18936e-11
Whole Blood	CD4+ T Cell	chr14:58572450:G:A	cg14832378	-1.23912	0	-1.24238	0	0.149503	1.25949e-12
Whole Blood	CD4+ T Cell	chr14:59395906:T:C	cg11247712	1.18792	0	1.18985	0	-0.125416	2.25447e-22
Whole Blood	CD4+ T Cell	chr14:68283210:G:A	cg18825221	-1.2691	0	-1.2577	0	0.117857	2.41976e-13
Whole Blood	CD4+ T Cell	chr14:76912344:C:T	cg13246055	1.40075	0	1.4	0	-0.175885	1.22942e-23
Whole Blood	CD4+ T Cell	chr14:77115994:C:A	cg08221848	1.05315	3.65922e-246	1.0569	3.45618e-255	0.158491	1.94431e-11
Whole Blood	CD4+ T Cell	chr14:90101683:G:C	cg23207176	1.29503	0	1.29598	0	-0.129222	1.01999e-12
Whole Blood	CD4+ T Cell	chr14:90265806:T:C	cg26262840	0.843656	1.19907e-300	0.846347	2.70062e-308	-0.111269	7.56799e-12
Whole Blood	CD4+ T Cell	chr14:100651112:T:C	cg00992253	1.24695	0	1.24593	0	-0.088133	1.49191e-10
Whole Blood	CD4+ T Cell	chr14:104660675:C:T	cg16761754	1.28396	1.18384e-242	1.29516	6.09492e-254	-0.189011	8.84749e-11
Whole Blood	CD4+ T Cell	chr15:40137571:G:A	cg06926377	1.14685	2.74648e-306	1.14446	8.18104007313535e-314	-0.162263	4.53138e-14
Whole Blood	CD4+ T Cell	chr15:40806141:C:T	cg03012280	1.28307	0	1.28334	0	-0.118014	1.09442e-15
Whole Blood	CD4+ T Cell	chr15:48551401:C:T	cg05697527	1.19252	0	1.19745	0	-0.132096	1.47348e-15
Whole Blood	CD4+ T Cell	chr15:77653206:T:C	cg05043354	1.17482	4.23788e-184	1.18254	3.90667e-190	-0.224578	1.43224e-10
Whole Blood	CD4+ T Cell	chr15:89069996:T:G	cg22446784	1.28178	0	1.28392	0	-0.116638	1.77259e-20
Whole Blood	CD4+ T Cell	chr15:99072069:C:A	cg03203706	1.29921	6.52920438584993e-316	1.29916	3.95252516672997e-323	-0.160611	1.09809e-10
Whole Blood	CD4+ T Cell	chr15:99472096:C:T	cg24309107	1.36569	0	1.36474	0	-0.157489	1.05694e-11
Whole Blood	CD4+ T Cell	chr16:66564507:G:A	cg03448915	-1.49701	1.98048e-202	-1.51526	2.16223e-209	0.247784	4.62045e-10
Whole Blood	CD4+ T Cell	chr16:68030569:T:C	cg02184558	1.39615	0	1.39696	0	-0.147498	1.6305e-10
Whole Blood	CD4+ T Cell	chr16:78877429:C:T	cg03660162	-1.28879	0	-1.29538	0	0.11434	4.70278e-13
Whole Blood	CD4+ T Cell	chr16:89751857:G:A	cg03809021	1.11751	7.52401e-156	1.13428	2.44472e-163	-0.230233	3.63906e-11
Whole Blood	CD4+ T Cell	chr17:601889:A:C	cg08889023	1.49387	0	1.49231	0	-0.208811	7.65343e-16
Whole Blood	CD4+ T Cell	chr17:3771627:G:A	cg25036312	1.34349	2.34100759815151e-310	1.34798	1.5069002198158e-320	-0.187163	3.12818e-14
Whole Blood	CD4+ T Cell	chr17:32506144:C:T	cg21855910	-0.316362	9.81937e-16	-0.327429	1.81179e-17	-0.239909	1.95859e-10
Whole Blood	CD4+ T Cell	chr17:35012264:G:C	cg08459711	0.963667	8.89282e-271	0.972592	1.14163e-279	-0.144346	3.5409e-12
Whole Blood	CD4+ T Cell	chr17:35866084:T:C	cg09536176	1.50349	3.73561e-297	1.50578	4.12309351575899e-310	-0.254549	1.0426e-16
Whole Blood	CD4+ T Cell	chr17:47844540:T:C	cg02219949	1.15685	0	1.16222	0	-0.130523	6.8039e-14
Whole Blood	CD4+ T Cell	chr17:65917792:T:C	cg02044966	0.0148493	0.589376	-0.0018313	0.945519	0.227007	8.54984e-17
Whole Blood	CD4+ T Cell	chr17:80938321:G:A	cg11949518	1.23792	0	1.23793	0	-0.141409	1.8839e-18
Whole Blood	CD4+ T Cell	chr18:48754789:T:C	cg17496939	1.39749	3.64593e-290	1.39167	8.69781e-299	-0.2394	4.91068e-17
Whole Blood	CD4+ T Cell	chr18:74981165:A:G	cg24884166	1.42622	0	1.42956	0	-0.162109	1.67974e-11
Whole Blood	CD4+ T Cell	chr19:32977504:C:A	cg18210893	1.37482	9.83687e-303	1.38015	0	-0.171387	1.66356e-10
Whole Blood	CD4+ T Cell	chr19:51477630:T:C	cg12550569	1.36626	0	1.3664	0	-0.163328	5.63811e-13
Whole Blood	CD4+ T Cell	chr19:51477630:T:C	cg22110428	1.44647	0	1.44619	0	-0.183748	5.10991e-19
Whole Blood	CD4+ T Cell	chr20:1492054:T:C	cg00572387	1.22356	0	1.22298	0	-0.101561	1.27157e-10
Whole Blood	CD4+ T Cell	chr20:3613229:C:T	cg05179723	1.50738	2.17791e-293	1.51098	1.1328e-299	-0.19237	1.75639e-10
Whole Blood	CD4+ T Cell	chr20:19260832:A:G	cg02970458	1.25816	9.00396e-280	1.24967	4.63929e-283	-0.168633	3.64493e-11
Whole Blood	CD4+ T Cell	chr20:49066356:C:T	cg11749817	1.14673	0	1.14698	0	-0.0945852	2.96617e-11
Whole Blood	CD4+ T Cell	chr20:50872515:T:G	cg20785120	1.36334	0	1.35986	0	-0.116503	1.86254e-14
Whole Blood	CD4+ T Cell	chr20:52421826:C:A	cg24871213	1.23807	0	1.2397	0	-0.112803	5.42657e-11
Whole Blood	CD4+ T Cell	chr21:29177040:G:T	cg15135067	1.3145	0	1.31314	0	-0.147879	1.17038e-15
Whole Blood	CD4+ T Cell	chr21:44065707:A:T	cg11665416	0.754591	3.65463e-170	0.761226	1.39766e-177	0.165412	2.39937e-13
Whole Blood	CD4+ T Cell	chr21:44964026:G:A	cg16087098	1.16386	4.8566e-264	1.1696	1.48692e-271	-0.175361	1.53386e-11
Whole Blood	CD4+ T Cell	chr22:30033126:A:G	cg26167301	1.4249	0	1.44852	0	-0.225236	3.42687e-19
Whole Blood	CD4+ T Cell	chr22:31268046:C:T	cg24989447	-1.24514	0	-1.24896	0	0.0978907	4.99201e-10
Whole Blood	CD4+ T Cell	chr22:50068234:G:A	cg01419035	1.33119	0	1.32859	0	-0.135813	4.88378e-14
Whole Blood	CD8+ T Cell	chr1:2143629:G:C	cg05340048	0.935336	1.30591e-230	0.938604	1.45576e-238	0.148968	3.93557e-11
Whole Blood	CD8+ T Cell	chr1:5948699:C:T	cg22356839	-1.41413	1.04306e-233	-1.42182	3.03337e-250	-0.368122	8.19333e-27
Whole Blood	CD8+ T Cell	chr1:6546548:C:T	cg19757108	1.19078	1.11963e-229	1.19213	1.01488e-237	0.21689	3.50607e-15
Whole Blood	CD8+ T Cell	chr1:7902438:C:G	cg23631229	1.18653	1.09473e-117	1.20027	3.47824e-123	0.294433	2.66216e-11
Whole Blood	CD8+ T Cell	chr1:11935984:A:G	cg17407342	1.11547	5.68824e-306	1.1118	1.55803422728046e-310	-0.14251	1.09536e-10
Whole Blood	CD8+ T Cell	chr1:12186118:C:T	cg02290262	1.10003	8.16618e-292	1.09944	2.37334e-298	-0.149045	9.28918e-12
Whole Blood	CD8+ T Cell	chr1:15078194:T:C	cg25835058	1.25848	0	1.26498	0	-0.133493	2.30391e-20
Whole Blood	CD8+ T Cell	chr1:16073889:C:A	cg17944189	-0.52211	2.98477e-76	-0.523905	3.61773e-79	-0.185882	5.07741e-12
Whole Blood	CD8+ T Cell	chr1:16357594:G:A	cg03586820	-0.820616	3.80529e-115	-0.819546	1.35514e-118	-0.214391	2.32208e-12
Whole Blood	CD8+ T Cell	chr1:23108326:C:T	cg12483005	1.4384	2.31184e-274	1.45119	7.36781e-293	0.3163	5.94985e-26
Whole Blood	CD8+ T Cell	chr1:27886646:T:C	cg27182070	1.00226	3.64601e-243	1.01142	7.35512e-255	0.176018	1.62329e-14
Whole Blood	CD8+ T Cell	chr1:28237768:A:G	cg02251754	1.2809	6.30253e-303	1.27424	3.45802744911793e-313	0.217707	1.54422e-19
Whole Blood	CD8+ T Cell	chr1:44810948:A:G	cg24643057	1.34075	0	1.33719	0	-0.157463	1.13045e-12
Whole Blood	CD8+ T Cell	chr1:58572195:G:A	cg26513689	-0.0957674	0.00279229	-0.101594	0.00126693	-0.210581	2.13527e-10
Whole Blood	CD8+ T Cell	chr1:66491002:G:A	cg26647036	-1.31656	0	-1.32326	0	0.155382	6.20764e-12
Whole Blood	CD8+ T Cell	chr1:86448489:T:C	cg17424433	-1.1519	8.06447e-244	-1.14792	2.52031e-248	-0.186252	2.52229e-11
Whole Blood	CD8+ T Cell	chr1:94304799:A:G	cg23505604	1.33845	0	1.33947	0	-0.153048	2.06438e-18
Whole Blood	CD8+ T Cell	chr1:100419863:A:G	cg07146231	0.994575	1.59248e-229	1.00136	1.98539e-236	0.15755	6.01614e-11
Whole Blood	CD8+ T Cell	chr1:113881031:C:T	cg03325407	0.766744	8.52653e-136	0.783102	1.73107e-143	0.185595	7.31767e-12
Whole Blood	CD8+ T Cell	chr1:116996751:G:T	cg08920071	-0.676169	1.40401e-105	-0.687869	2.22412e-111	-0.183789	2.80397e-11
Whole Blood	CD8+ T Cell	chr1:160055093:T:C	cg11789449	-1.19901	6.08547e-206	-1.20038	3.56743e-212	0.230076	6.18704e-13
Whole Blood	CD8+ T Cell	chr1:165842492:C:T	cg01427815	1.2175	0	1.22177	0	-0.155496	2.34792e-22
Whole Blood	CD8+ T Cell	chr1:165921658:C:G	cg08622435	1.26878	0	1.28207	0	-0.207132	1.61395e-25
Whole Blood	CD8+ T Cell	chr1:167455687:C:T	cg18469283	-0.820186	3.4227e-125	-0.818565	1.80182e-131	0.217436	7.48245e-13
Whole Blood	CD8+ T Cell	chr1:173444541:C:A	cg25302646	-1.29899	1.73818e-247	-1.3194	2.11449e-256	0.208761	9.80417e-12
Whole Blood	CD8+ T Cell	chr1:175065507:A:T	cg23658987	1.20172	6.66499e-234	1.21159	2.73044e-243	-0.196542	1.71581e-13
Whole Blood	CD8+ T Cell	chr1:207353248:G:A	cg00797651	-0.88972	1.26423e-227	-0.887701	1.86585e-232	-0.145148	4.08218e-11
Whole Blood	CD8+ T Cell	chr1:211252316:T:G	cg25617285	0.89296	4.61657e-210	0.898357	1.73913e-217	0.158745	1.05202e-11
Whole Blood	CD8+ T Cell	chr1:223102899:T:C	cg06155710	-0.288953	7.51435e-29	-0.288282	6.67712e-30	-0.185952	2.95776e-13
Whole Blood	CD8+ T Cell	chr1:235991065:G:T	cg25119497	1.15616	0	1.15506	0	-0.124384	2.29594e-13
Whole Blood	CD8+ T Cell	chr1:246262851:C:A	cg12024053	1.22931	0	1.23483	0	0.129211	1.02008e-12
Whole Blood	CD8+ T Cell	chr1:248397260:A:G	cg16274221	-0.969316	9.60979e-198	-0.96379	1.043e-200	-0.168891	3.78497e-11
Whole Blood	CD8+ T Cell	chr2:10780548:T:C	cg23155853	1.07052	4.74014e-298	1.07119	3.39616772426106e-318	0.232243	5.22624e-31
Whole Blood	CD8+ T Cell	chr2:24286501:T:C	cg14991251	1.34497	0	1.33727	0	-0.128458	2.33931e-10
Whole Blood	CD8+ T Cell	chr2:37013907:G:A	cg25176297	1.29862	0	1.29836	0	-0.116861	9.30379e-12
Whole Blood	CD8+ T Cell	chr2:37852540:C:G	cg25063737	1.11982	0	1.12528	0	0.189841	6.37742e-26
Whole Blood	CD8+ T Cell	chr2:42055492:A:T	cg19522960	1.25805	3.7631192142686e-312	1.25913	1.75887369919484e-321	-0.172922	1.19749e-14
Whole Blood	CD8+ T Cell	chr2:46648895:G:C	cg21054447	1.24155	0	1.23876	0	-0.134057	2.06316e-17
Whole Blood	CD8+ T Cell	chr2:47576256:G:A	cg04735632	-1.23245	2.5393e-270	-1.22323	5.84724e-277	0.208857	6.89219e-17
Whole Blood	CD8+ T Cell	chr2:54602459:C:G	cg16152092	1.38002	0	1.37803	0	0.210258	1.13406e-18
Whole Blood	CD8+ T Cell	chr2:58558408:G:A	cg14158202	0.913166	5.31144e-235	0.909934	3.68618e-243	0.178403	1.50195e-16
Whole Blood	CD8+ T Cell	chr2:60350832:T:G	cg07298397	1.26029	0	1.25563	0	-0.132992	6.37417e-11
Whole Blood	CD8+ T Cell	chr2:68400443:T:C	cg02141393	0.723743	8.28957e-164	0.71653	5.53084e-166	0.155406	5.18524e-12
Whole Blood	CD8+ T Cell	chr2:70137032:A:G	cg01726273	-1.18953	0	-1.19131	0	0.152557	1.11313e-13
Whole Blood	CD8+ T Cell	chr2:74472651:C:A	cg04255230	1.1613	0	1.15629	0	-0.114244	1.04498e-10
Whole Blood	CD8+ T Cell	chr2:75008736:T:G	cg23355731	1.07604	2.72805e-304	1.07711	1.61393345567681e-310	0.144744	6.71504e-11
Whole Blood	CD8+ T Cell	chr2:75030119:T:C	cg19149019	0.953804	4.21844e-201	0.954429	5.85359e-208	0.208663	1.44898e-14
Whole Blood	CD8+ T Cell	chr2:85949076:C:G	cg02436349	1.34985	0	1.34658	0	-0.13688	3.56038e-14
Whole Blood	CD8+ T Cell	chr2:85949076:C:G	cg12808797	1.33215	0	1.32815	0	-0.128758	9.80446e-17
Whole Blood	CD8+ T Cell	chr2:99261002:A:G	cg05043910	1.26299	0	1.2597	0	-0.0901234	5.53222e-11
Whole Blood	CD8+ T Cell	chr2:102374328:G:T	cg03938978	1.38545	2.39716698837006e-318	1.39273	0	-0.242565	3.66196e-21
Whole Blood	CD8+ T Cell	chr2:104576842:A:G	cg27666049	1.14957	0	1.15393	0	0.121986	5.18606e-16
Whole Blood	CD8+ T Cell	chr2:112089587:C:T	cg18349077	1.33822	0	1.34398	0	-0.159912	3.12336e-32
Whole Blood	CD8+ T Cell	chr2:112089587:C:T	cg26844603	1.34509	0	1.35022	0	-0.158774	1.36736e-28
Whole Blood	CD8+ T Cell	chr2:113235767:A:C	cg03300729	1.13775	0	1.13894	0	-0.122985	6.55541e-11
Whole Blood	CD8+ T Cell	chr2:119350654:A:C	cg00435273	1.45326	0	1.45615	0	-0.215459	5.14282e-19
Whole Blood	CD8+ T Cell	chr2:132402025:A:T	cg25291037	1.2211	0	1.21958	0	-0.143547	1.99699e-25
Whole Blood	CD8+ T Cell	chr2:141810896:G:A	cg05291244	-0.97926	1.46553e-200	-0.980582	2.8277e-209	-0.22527	9.42043e-17
Whole Blood	CD8+ T Cell	chr2:144484555:A:G	cg20171775	-1.22243	0	-1.22336	0	0.104069	9.53359e-12
Whole Blood	CD8+ T Cell	chr2:151303366:G:A	cg04758026	-1.16874	0	-1.16538	0	0.147715	7.03441e-21
Whole Blood	CD8+ T Cell	chr2:165077172:C:T	cg27246321	0.912124	8.72129e-183	0.914227	3.13028e-188	0.166405	8.6594e-11
Whole Blood	CD8+ T Cell	chr2:171354834:G:A	cg03085275	1.52696	1.93734e-305	1.54327	5.92604732605848e-315	0.201714	1.09569e-12
Whole Blood	CD8+ T Cell	chr2:172322471:T:A	cg01972924	1.16571	1.37094e-197	1.14478	1.09557e-196	-0.235958	2.52922e-13
Whole Blood	CD8+ T Cell	chr2:173100568:G:A	cg09210666	0.933706	3.73919e-234	0.932921	2.62374e-240	0.159869	2.68154e-13
Whole Blood	CD8+ T Cell	chr2:180596125:C:T	cg23363182	1.28861	0	1.28502	0	0.173986	1.01323e-14
Whole Blood	CD8+ T Cell	chr2:190677788:C:T	cg06524124	1.2249	7.4541e-304	1.22331	3.62477201360199e-310	-0.152953	1.17299e-10
Whole Blood	CD8+ T Cell	chr2:191021968:T:A	cg21154079	-1.21357	1.78381e-227	-1.2067	3.48803e-231	-0.187195	9.65122e-11
Whole Blood	CD8+ T Cell	chr2:202345306:G:A	cg01625260	0.722027	6.22652e-120	0.723145	2.14186e-123	0.170477	2.28877e-10
Whole Blood	CD8+ T Cell	chr2:208060995:T:C	cg09032228	-0.636386	7.61493e-118	-0.632299	1.50707e-120	-0.175106	6.64553e-13
Whole Blood	CD8+ T Cell	chr2:214884532:A:G	cg02254041	-0.645778	1.16189e-73	-0.654376	3.06573e-77	-0.212928	2.68585e-10
Whole Blood	CD8+ T Cell	chr2:224882321:T:C	cg08388413	-1.22994	3.68805e-225	-1.24354	7.35366e-237	0.259246	1.815e-17
Whole Blood	CD8+ T Cell	chr2:224909673:C:T	cg24483442	-0.987298	5.02715e-234	-0.986964	1.83278e-243	0.203198	5.11006e-18
Whole Blood	CD8+ T Cell	chr2:233234402:C:G	cg19193136	0.425193	9.29265e-85	0.423151	1.14432e-86	0.134081	2.09108e-11
Whole Blood	CD8+ T Cell	chr2:237905305:A:G	cg13388618	-1.24974	0	-1.24951	0	0.105256	1.31825e-10
Whole Blood	CD8+ T Cell	chr2:239061654:G:A	cg09155776	1.2381	7.01971633706452e-314	1.23939	9.88131291682493e-324	-0.189869	1.24734e-15
Whole Blood	CD8+ T Cell	chr2:239192777:T:C	cg03475776	-1.21566	0	-1.20868	0	0.113544	4.51471e-11
Whole Blood	CD8+ T Cell	chr3:32456337:C:G	cg14760916	1.27098	0	1.27688	0	0.155634	2.95284e-13
Whole Blood	CD8+ T Cell	chr3:32759045:A:G	cg15709265	1.36881	0	1.36835	0	-0.187599	3.81845e-23
Whole Blood	CD8+ T Cell	chr3:43029995:T:A	cg08151370	1.10795	0	1.11001	0	-0.116442	1.11591e-11
Whole Blood	CD8+ T Cell	chr3:122975553:C:T	cg10547711	-0.747703	1.25155e-83	-0.757936	9.60871e-88	-0.219266	2.46459e-10
Whole Blood	CD8+ T Cell	chr3:124582543:A:G	cg24253342	-1.10887	1.89085e-201	-1.10511	1.54705e-207	-0.233992	4.79869e-15
Whole Blood	CD8+ T Cell	chr3:140572936:C:G	cg19546024	1.00076	2.06853e-246	1.0016	1.76638e-252	0.150698	1.71686e-11
Whole Blood	CD8+ T Cell	chr3:141429856:C:A	cg10599156	1.42305	0	1.43032	0	-0.19245	1.05227e-14
Whole Blood	CD8+ T Cell	chr3:158727071:C:T	cg03673894	1.34629	0	1.33902	0	-0.239304	4.931e-36
Whole Blood	CD8+ T Cell	chr3:177617834:C:T	cg15710610	1.15368	0	1.14528	0	0.139225	2.00994e-12
Whole Blood	CD8+ T Cell	chr3:177617834:C:T	cg17616904	0.87797	2.53662e-174	0.867385	5.14593e-177	0.204188	1.48499e-14
Whole Blood	CD8+ T Cell	chr3:179770023:C:T	cg10737404	0.344896	7.24788e-40	0.338008	6.73404e-40	-0.155991	2.76875e-11
Whole Blood	CD8+ T Cell	chr3:183782914:G:C	cg13217899	0.697773	7.47645e-110	0.696385	1.33985e-115	0.244234	2.00636e-19
Whole Blood	CD8+ T Cell	chr3:183814101:T:C	cg18489755	0.997302	8.68424e-292	0.998102	7.86096e-300	0.126611	5.77016e-11
Whole Blood	CD8+ T Cell	chr3:194780197:T:C	cg21284822	1.18473	0	1.18091	0	-0.131044	7.34371e-14
Whole Blood	CD8+ T Cell	chr4:513212:C:T	cg18683082	0.994277	3.24908e-118	0.991743	2.1598e-121	-0.257183	6.38378e-11
Whole Blood	CD8+ T Cell	chr4:725926:A:G	cg13941682	1.13432	0	1.13317	0	-0.0936729	3.84864e-11
Whole Blood	CD8+ T Cell	chr4:2684608:T:C	cg10181818	0.972072	3.7417e-174	0.977683	6.56686e-180	0.19003	1.77949e-10
Whole Blood	CD8+ T Cell	chr4:8392736:C:T	cg15728601	-1.14723	8.32822e-215	-1.16489	5.53278e-224	-0.202417	1.77835e-12
Whole Blood	CD8+ T Cell	chr4:16226915:C:T	cg00555420	-1.23242	0	-1.2402	0	0.151096	1.01056e-13
Whole Blood	CD8+ T Cell	chr4:38782227:T:C	cg08888038	0.55533	1.95839e-59	0.569261	9.9642e-65	-0.249074	1.97655e-14
Whole Blood	CD8+ T Cell	chr4:54150623:T:C	cg02500748	1.33963	0	1.3561	0	-0.175624	2.96079e-25
Whole Blood	CD8+ T Cell	chr4:98116528:C:T	cg04182260	-1.17809	0	-1.17566	0	-0.159105	6.87307e-18
Whole Blood	CD8+ T Cell	chr4:107995262:T:C	cg13596487	1.54126	0	1.51623	0	-0.201304	2.88534e-14
Whole Blood	CD8+ T Cell	chr4:121808146:T:C	cg11979875	-1.24907	2.293e-303	-1.25272	9.61614433852501e-311	-0.172007	2.50941e-11
Whole Blood	CD8+ T Cell	chr4:150310219:T:C	cg14879894	1.16088	1.81026983145136e-313	1.15997	1.32913540044212e-319	0.141263	5.43773e-11
Whole Blood	CD8+ T Cell	chr4:177580762:T:C	cg02822178	0.652184	1.27137e-91	0.650901	9.19835e-95	0.215928	2.43339e-13
Whole Blood	CD8+ T Cell	chr5:1106552:C:A	cg13681701	0.835814	5.41771e-253	0.828962	7.33568e-256	-0.125529	1.00652e-11
Whole Blood	CD8+ T Cell	chr5:1106552:C:A	cg08830157	0.643654	3.76858e-137	0.635484	2.30139e-138	-0.143611	6.68048e-11
Whole Blood	CD8+ T Cell	chr5:32539337:G:C	cg08750510	-1.15595	1.22352e-302	-1.15837	0	0.157529	1.62584e-11
Whole Blood	CD8+ T Cell	chr5:43096540:G:T	cg24478283	0.780642	5.42163e-161	0.777163	8.69721e-164	0.155564	1.20154e-10
Whole Blood	CD8+ T Cell	chr5:56565532:G:A	cg01369914	-1.4946	0	-1.48843	0	0.167171	1.81856e-11
Whole Blood	CD8+ T Cell	chr5:56742321:C:A	cg22788141	-1.14209	0	-1.14101	0	-0.116791	1.89122e-16
Whole Blood	CD8+ T Cell	chr5:72498742:G:A	cg21006536	1.31545	0	1.31736	0	-0.107366	1.59804e-10
Whole Blood	CD8+ T Cell	chr5:73638729:C:T	cg04480106	-1.24519	1.90910850392219e-312	-1.23372	2.81123263551853e-316	-0.176042	3.37266e-14
Whole Blood	CD8+ T Cell	chr5:74487899:A:G	cg06332941	-1.14623	1.91758e-303	-1.1479	1.16797118676871e-320	-0.227088	5.88631e-26
Whole Blood	CD8+ T Cell	chr5:79733465:C:A	cg15592194	-1.21072	6.72029e-211	-1.20672	1.77292e-215	0.223918	6.20599e-12
Whole Blood	CD8+ T Cell	chr5:80070257:T:C	cg20942286	1.26222	0	1.26357	0	-0.149509	7.91508e-13
Whole Blood	CD8+ T Cell	chr5:107260141:T:C	cg26973852	-0.728009	1.43318e-94	-0.717912	6.41647e-95	-0.202873	2.24152e-10
Whole Blood	CD8+ T Cell	chr5:132940844:C:T	cg14825688	-1.05245	1.98656e-270	-1.0534	7.54905e-279	-0.170475	1.66241e-14
Whole Blood	CD8+ T Cell	chr5:139915092:G:A	cg22710094	0.94354	1.69983e-197	0.946918	1.86533e-204	0.184364	5.40782e-13
Whole Blood	CD8+ T Cell	chr5:142162590:T:A	cg07392085	-0.577936	1.86175e-105	-0.572681	3.71099e-107	-0.169608	2.80664e-12
Whole Blood	CD8+ T Cell	chr5:149066724:C:T	cg10941211	1.56081	0	1.54782	0	-0.216541	3.6524e-14
Whole Blood	CD8+ T Cell	chr5:150490495:A:G	cg11100481	1.26058	0	1.26464	0	-0.142936	3.49904e-11
Whole Blood	CD8+ T Cell	chr5:150490495:A:G	cg12636435	1.1994	0	1.20683	0	-0.196488	2.72989e-21
Whole Blood	CD8+ T Cell	chr5:154656755:A:G	cg08754654	1.4125	1.38562e-212	1.43067	6.65885e-221	-0.242118	6.41e-12
Whole Blood	CD8+ T Cell	chr5:163469136:G:A	cg25620989	-0.306314	4.93039e-29	-0.323084	2.12804e-33	-0.221059	5.66272e-17
Whole Blood	CD8+ T Cell	chr5:163469136:G:A	cg20638514	-0.306022	8.61406e-15	-0.335436	1.62738e-18	-0.373637	2.08716e-22
Whole Blood	CD8+ T Cell	chr5:168653294:T:C	cg15088158	1.22788	0	1.2287	0	0.154047	4.42836e-17
Whole Blood	CD8+ T Cell	chr5:173595226:G:T	cg14904688	1.19474	0	1.19396	0	0.139506	3.66432e-12
Whole Blood	CD8+ T Cell	chr6:2227005:C:A	cg22851977	1.33107	0	1.35522	0	-0.215308	1.68128e-34
Whole Blood	CD8+ T Cell	chr6:2436931:A:C	cg18740289	-0.906096	3.09627e-173	-0.907211	6.21345e-179	-0.183132	6.11152e-12
Whole Blood	CD8+ T Cell	chr6:8109882:G:A	cg12777182	1.27309	0	1.2732	0	-0.158579	2.49489e-31
Whole Blood	CD8+ T Cell	chr6:14095524:G:A	cg19382647	1.33815	1.34946916616236e-317	1.35411	0	0.179516	2.25648e-13
Whole Blood	CD8+ T Cell	chr6:14372052:A:G	cg16034233	-1.10532	7.27528e-298	-1.10245	2.77107e-306	-0.165271	6.59065e-16
Whole Blood	CD8+ T Cell	chr6:19875321:G:A	cg12145721	1.06532	0	1.065	0	0.114373	5.43537e-12
Whole Blood	CD8+ T Cell	chr6:25406405:C:T	cg11960391	0.855102	9.83961e-210	0.862805	1.31732e-220	0.192276	1.71265e-17
Whole Blood	CD8+ T Cell	chr6:25399933:C:T	cg22183174	0.043764	0.139405	0.0356316	0.218841	-0.222588	1.99994e-13
Whole Blood	CD8+ T Cell	chr6:26365451:T:G	cg09614754	1.51365	4.29962e-215	1.53389	5.06106e-223	0.275398	1.69581e-10
Whole Blood	CD8+ T Cell	chr6:30000812:A:G	cg24400518	-0.68424	8.41591e-111	-0.697722	7.56275e-117	0.193605	1.32612e-12
Whole Blood	CD8+ T Cell	chr6:30091360:T:G	cg09316544	1.02005	3.58125e-210	1.00338	2.82492e-212	0.214722	2.02958e-16
Whole Blood	CD8+ T Cell	chr6:29992607:C:A	cg23712018	1.3546	0	1.36771	0	-0.142864	6.7894e-13
Whole Blood	CD8+ T Cell	chr6:29982804:A:G	cg03343571	1.33812	7.80225898771138e-317	1.35521	0	-0.190139	1.5435e-14
Whole Blood	CD8+ T Cell	chr6:29992607:C:A	cg13185413	1.34578	0	1.36101	0	-0.137393	1.34156e-10
Whole Blood	CD8+ T Cell	chr6:29976118:G:C	cg06249604	1.34725	0	1.3605	0	-0.143563	4.60687e-11
Whole Blood	CD8+ T Cell	chr6:29997052:A:T	cg09279736	1.36696	0	1.38885	0	-0.185736	1.15143e-18
Whole Blood	CD8+ T Cell	chr6:29997052:A:T	cg07382347	1.36013	0	1.3768	0	-0.153264	1.87638e-14
Whole Blood	CD8+ T Cell	chr6:29997052:A:T	cg13401893	1.35958	0	1.37887	0	-0.176653	6.66748e-18
Whole Blood	CD8+ T Cell	chr6:29977843:C:T	cg12633154	1.35069	0	1.37192	0	-0.174732	5.39482e-17
Whole Blood	CD8+ T Cell	chr6:29997052:A:T	cg16078649	1.35634	0	1.37294	0	-0.160656	8.61226e-15
Whole Blood	CD8+ T Cell	chr6:31107384:G:A	cg17663033	1.22592	6.67634e-276	1.22389	3.35253e-283	0.200939	1.77914e-14
Whole Blood	CD8+ T Cell	chr6:31413963:A:C	cg12182649	1.2721	0	1.2686	0	-0.0999719	3.7578e-11
Whole Blood	CD8+ T Cell	chr6:32216289:G:T	cg11981868	0.996775	1.0039e-240	0.993133	3.61855e-248	0.199421	1.06685e-17
Whole Blood	CD8+ T Cell	chr6:33150591:T:G	cg01246982	1.05269	2.28677e-205	1.04669	4.37869e-208	0.1709	1.88176e-10
Whole Blood	CD8+ T Cell	chr6:53726434:A:G	cg26764953	1.23156	5.62481e-273	1.21879	1.35683e-277	-0.202976	1.54373e-15
Whole Blood	CD8+ T Cell	chr6:75723922:G:A	cg06981636	1.06312	2.76676761671098e-321	1.05502	0	-0.124568	6.48538e-10
Whole Blood	CD8+ T Cell	chr6:89587169:C:T	cg17310423	-0.478035	2.97403e-41	-0.468083	5.98268e-41	-0.223114	5.25256e-11
Whole Blood	CD8+ T Cell	chr6:90220794:T:C	cg18477569	1.09441	0	1.10421	0	-0.1624	2.84633e-17
Whole Blood	CD8+ T Cell	chr6:100252222:A:G	cg00639920	-0.901812	9.03579e-223	-0.897606	3.1006e-226	-0.143387	1.43763e-10
Whole Blood	CD8+ T Cell	chr6:106788619:G:A	cg00611605	-1.39491	0	-1.37909	0	0.238572	1.89553e-24
Whole Blood	CD8+ T Cell	chr6:111790191:C:A	cg11602361	0.936624	5.97423e-157	0.935951	1.9711e-162	0.220355	5.76205e-14
Whole Blood	CD8+ T Cell	chr6:125012651:T:C	cg01842756	-0.767479	2.69114e-100	-0.768399	2.80439e-103	-0.200049	2.59432e-10
Whole Blood	CD8+ T Cell	chr6:125846326:G:T	cg01665880	0.652301	4.46139e-107	0.648874	3.23008e-109	-0.181451	4.1234e-11
Whole Blood	CD8+ T Cell	chr6:131183261:T:C	cg26435773	-1.53834	0	-1.54631	0	0.168103	1.87519e-10
Whole Blood	CD8+ T Cell	chr6:136762000:C:T	cg10038802	0.81826	2.35397e-148	0.821562	3.56471e-153	0.182171	4.30896e-11
Whole Blood	CD8+ T Cell	chr6:142382346:A:G	cg18131185	1.25769	2.91887e-308	1.25438	3.345328369304e-318	-0.21226	6.83844e-18
Whole Blood	CD8+ T Cell	chr6:142399217:G:A	cg04753771	1.27895	3.38336154272086e-320	1.27636	0	-0.178338	2.29912e-13
Whole Blood	CD8+ T Cell	chr6:166259330:G:A	cg15675601	-1.02164	2.21368e-288	-1.01439	4.05698e-292	-0.132767	2.3535e-11
Whole Blood	CD8+ T Cell	chr7:2104322:G:A	cg24655669	1.16491	4.41243e-165	1.15164	3.15918e-167	0.250154	6.38977e-13
Whole Blood	CD8+ T Cell	chr7:3605313:A:C	cg18454042	1.01063	5.86488e-221	1.0167	1.0525e-231	0.214705	5.43287e-18
Whole Blood	CD8+ T Cell	chr7:4088948:T:C	cg23187754	-1.27775	1.02618765327993e-312	-1.27613	1.02554194238559e-318	-0.164577	7.21671e-12
Whole Blood	CD8+ T Cell	chr7:24336209:G:A	cg04932937	1.29643	0	1.28727	0	-0.148035	2.36677e-14
Whole Blood	CD8+ T Cell	chr7:27613819:C:T	cg04336659	1.00527	5.96323e-91	1.02249	7.21028e-96	0.309213	7.18587e-11
Whole Blood	CD8+ T Cell	chr7:37340662:A:G	cg18891815	-1.28915	0	-1.29184	0	0.115497	5.39505e-15
Whole Blood	CD8+ T Cell	chr7:43618453:G:A	cg12894711	1.27223	0	1.27128	0	-0.183279	7.5824e-23
Whole Blood	CD8+ T Cell	chr7:68486052:T:C	cg04172761	0.0120344	0.755887	0.0204895	0.589879	0.268198	1.51863e-11
Whole Blood	CD8+ T Cell	chr7:76294901:G:T	cg10193107	1.20223	0	1.20148	0	-0.209522	5.54022e-22
Whole Blood	CD8+ T Cell	chr7:77416489:G:C	cg14693258	-0.829868	2.51913e-140	-0.821472	1.41764e-147	-0.274223	3.21559e-22
Whole Blood	CD8+ T Cell	chr7:95417396:C:T	cg06695683	0.842575	6.57186e-152	0.843172	2.9518e-156	0.18291	2.86741e-11
Whole Blood	CD8+ T Cell	chr7:105905566:A:G	cg02236157	1.01331	1.30459e-236	1.01149	2.04823e-246	0.186267	5.33283e-14
Whole Blood	CD8+ T Cell	chr7:108202270:A:G	cg12014714	-1.47421	9.45468300461297e-313	-1.48377	0	-0.223643	5.30296e-15
Whole Blood	CD8+ T Cell	chr7:123032921:C:T	cg03640110	1.14799	8.51525e-251	1.14372	1.47249e-256	0.184732	6.12597e-13
Whole Blood	CD8+ T Cell	chr7:144874107:C:T	cg23398560	-0.970642	5.4612e-269	-0.974224	2.5826e-276	-0.144398	6.41005e-12
Whole Blood	CD8+ T Cell	chr7:150333874:T:C	cg12556325	-0.250347	1.36186e-13	-0.263733	1.44297e-15	0.250706	4.9145e-15
Whole Blood	CD8+ T Cell	chr7:150695655:C:T	cg03450844	-1.07933	1.05821e-275	-1.07718	3.23932e-284	-0.181238	5.34008e-16
Whole Blood	CD8+ T Cell	chr7:158737013:G:A	cg03803940	1.24201	0	1.24017	0	-0.0994518	3.18915e-14
Whole Blood	CD8+ T Cell	chr7:158735887:C:G	cg26651303	1.20786	0	1.20306	0	-0.197539	7.0634e-22
Whole Blood	CD8+ T Cell	chr8:867092:C:T	cg07178994	-1.41056	6.35693e-272	-1.41252	1.99631e-278	0.180875	2.70164e-11
Whole Blood	CD8+ T Cell	chr8:950714:C:T	cg05682581	1.33217	3.192e-223	1.32793	1.8254e-227	-0.218391	3.82639e-11
Whole Blood	CD8+ T Cell	chr8:52183618:T:C	cg02846517	-1.29383	4.53088476782129e-311	-1.30196	2.00078800202455e-318	0.161765	1.38924e-10
Whole Blood	CD8+ T Cell	chr8:78729534:G:A	cg03983883	1.25595	6.06857e-268	1.24545	3.57029e-270	-0.182275	4.28801e-11
Whole Blood	CD8+ T Cell	chr8:78729534:G:A	cg21140145	1.2393	4.46145e-268	1.22879	2.06487e-274	-0.213333	3.01386e-15
Whole Blood	CD8+ T Cell	chr8:101143494:T:C	cg11633264	-0.786396	6.41467e-161	-0.787745	2.06096e-166	0.171519	8.89686e-12
Whole Blood	CD8+ T Cell	chr8:102941575:G:A	cg27163126	-0.400164	1.21267e-33	-0.390382	5.22026e-34	-0.274853	2.69556e-18
Whole Blood	CD8+ T Cell	chr8:120979471:T:G	cg05219430	0.124686	0.000283879	0.11934	0.000366191	-0.255309	1.20358e-14
Whole Blood	CD8+ T Cell	chr8:122971048:T:C	cg02184632	1.08547	2.24302e-306	1.09642	6.04717674828273e-317	0.139847	6.13937e-12
Whole Blood	CD8+ T Cell	chr8:128376205:C:G	cg27027215	0.85565	1.30066e-115	0.86433	3.1007e-120	0.208854	1.30406e-10
Whole Blood	CD8+ T Cell	chr8:130132877:T:C	cg14282460	-1.21485	0	-1.21817	0	-0.145167	1.84273e-14
Whole Blood	CD8+ T Cell	chr8:132981201:C:T	cg02496181	-0.939356	3.87273e-193	-0.949009	2.53474e-203	-0.197062	2.14704e-15
Whole Blood	CD8+ T Cell	chr8:133578866:G:A	cg01175791	0.954507	5.23746e-198	0.954377	3.21793e-203	0.171442	5.59066e-12
Whole Blood	CD8+ T Cell	chr8:141405550:A:G	cg20273186	-0.798689	3.99095e-187	-0.812442	1.0851e-199	-0.191267	1.7797e-17
Whole Blood	CD8+ T Cell	chr8:143543507:T:G	cg20583945	1.33525	4.47968e-296	1.33898	2.80546136550788e-311	-0.254374	7.79436e-23
Whole Blood	CD8+ T Cell	chr8:143596176:C:T	cg00713939	1.09253	1.78843e-180	1.10575	4.94182e-188	0.197726	1.62806e-11
Whole Blood	CD8+ T Cell	chr8:143596176:C:T	cg23966224	1.27381	1.43756e-212	1.29073	1.94461e-224	0.232457	1.29262e-14
Whole Blood	CD8+ T Cell	chr8:143596176:C:T	cg19357499	1.28155	1.14919e-208	1.29983	1.0002e-221	0.261609	1.75477e-17
Whole Blood	CD8+ T Cell	chr8:143613006:C:T	cg00600477	-1.28739	0	-1.28795	0	0.102047	2.07548e-10
Whole Blood	CD8+ T Cell	chr8:143928115:A:G	cg22822867	1.0525	1.1831e-293	1.05087	3.64385e-307	0.187795	3.43144e-21
Whole Blood	CD8+ T Cell	chr8:143952414:G:A	cg02331830	-1.25006	0	-1.25889	0	0.157121	2.68224e-21
Whole Blood	CD8+ T Cell	chr9:606428:T:C	cg00723395	1.00183	6.02976e-276	1.00271	9.24937e-285	-0.172983	4.25908e-15
Whole Blood	CD8+ T Cell	chr9:4146947:T:G	cg11935287	1.23082	0	1.24133	0	-0.146866	3.82408e-12
Whole Blood	CD8+ T Cell	chr9:33132046:A:G	cg27012316	1.19111	0	1.18929	0	-0.102959	1.21624e-10
Whole Blood	CD8+ T Cell	chr9:97922475:A:G	cg11093459	-1.36614	5.92878775009496e-323	-1.36495	0	-0.172237	2.77298e-11
Whole Blood	CD8+ T Cell	chr9:108785319:T:G	cg13837146	1.25196	0	1.25709	0	-0.108762	7.28696e-12
Whole Blood	CD8+ T Cell	chr9:121511899:G:A	cg14116294	-1.24227	5.28011e-213	-1.26223	5.65205e-222	0.207965	2.78262e-12
Whole Blood	CD8+ T Cell	chr9:121511899:G:A	cg08151264	1.23799	8.55804e-205	1.26399	1.64775e-219	-0.279981	2.42173e-20
Whole Blood	CD8+ T Cell	chr9:124267457:G:A	cg13512951	-0.893831	8.84003e-234	-0.885556	1.82159e-241	0.195858	7.50928e-20
Whole Blood	CD8+ T Cell	chr9:127385700:A:G	cg20758474	0.975389	5.65111e-225	0.978821	5.48148e-232	0.166478	2.6015e-12
Whole Blood	CD8+ T Cell	chr9:127386335:C:T	cg12281690	1.0205	4.44639e-256	1.02423	4.54792e-263	0.15198	1.39162e-11
Whole Blood	CD8+ T Cell	chr9:127385700:A:G	cg19021975	1.00638	1.41142e-235	1.00985	2.20818e-242	0.159694	1.61689e-11
Whole Blood	CD8+ T Cell	chr9:129841635:G:C	cg14044707	-0.770193	1.60445e-63	-0.761578	1.81793e-64	0.306812	2.72638e-12
Whole Blood	CD8+ T Cell	chr9:133253171:T:C	cg04883291	0.971044	5.30319e-159	0.984755	7.78075e-168	0.217836	2.46722e-13
Whole Blood	CD8+ T Cell	chr10:1272353:T:C	cg02305391	1.30526	0	1.30068	0	-0.157474	2.99258e-15
Whole Blood	CD8+ T Cell	chr10:4731317:G:T	cg21641816	-1.25008	0	-1.25676	0	-0.143638	5.46453e-11
Whole Blood	CD8+ T Cell	chr10:6060627:C:T	cg26316423	-1.16462	2.30424e-213	-1.15514	2.40004e-215	0.203818	4.39173e-11
Whole Blood	CD8+ T Cell	chr10:11875617:A:G	cg22626578	-0.475424	4.41472e-53	-0.475738	3.57656e-55	0.211903	3.90872e-13
Whole Blood	CD8+ T Cell	chr10:13127066:G:A	cg23150800	-0.978461	5.49761e-208	-0.977524	9.88105e-215	-0.201821	1.49833e-14
Whole Blood	CD8+ T Cell	chr10:28328490:A:G	cg09294573	1.56916	0	1.56898	0	-0.146865	1.06347e-11
Whole Blood	CD8+ T Cell	chr10:30751163:T:C	cg11198398	-1.18483	0	-1.17694	0	0.113738	2.46543e-11
Whole Blood	CD8+ T Cell	chr10:45122580:C:G	cg03955764	1.18857	0	1.19227	0	-0.128886	9.57414e-11
Whole Blood	CD8+ T Cell	chr10:52030274:C:T	cg04335523	0.834241	4.45063e-178	0.829915	1.81205e-181	0.173251	4.19095e-12
Whole Blood	CD8+ T Cell	chr10:53809212:T:G	cg06395652	1.04421	3.10309e-256	1.03748	1.86451e-260	0.160629	9.27342e-13
Whole Blood	CD8+ T Cell	chr10:68714604:A:C	cg02179936	1.367	0	1.36891	0	-0.155313	7.22598e-15
Whole Blood	CD8+ T Cell	chr10:69231440:G:T	cg05470908	0.756055	1.3163e-118	0.760295	4.78542e-123	0.198216	3.05062e-11
Whole Blood	CD8+ T Cell	chr10:71345340:C:G	cg17434453	-0.729827	1.21765e-139	-0.735513	1.15756e-147	-0.202161	6.96793e-16
Whole Blood	CD8+ T Cell	chr10:73857586:A:T	cg07406461	1.04331	4.32447e-193	1.03827	3.19854e-198	0.217578	1.07575e-13
Whole Blood	CD8+ T Cell	chr10:79211439:C:T	cg06073814	1.17116	0	1.17808	0	-0.115753	5.96402e-11
Whole Blood	CD8+ T Cell	chr10:89957025:T:A	cg25278353	1.17239	0	1.18373	0	-0.156058	1.43427e-14
Whole Blood	CD8+ T Cell	chr10:94636131:G:T	cg10751070	1.18895	1.01696e-260	1.18428	1.163e-264	-0.173049	1.00167e-10
Whole Blood	CD8+ T Cell	chr10:95715817:A:C	cg06542357	-0.801898	9.68517e-144	-0.804561	3.1887e-148	-0.173818	4.74082e-11
Whole Blood	CD8+ T Cell	chr10:95714614:G:A	cg03610280	0.998128	6.81006e-240	1.00165	3.29552e-256	0.228079	9.68211e-25
Whole Blood	CD8+ T Cell	chr10:95716822:G:A	cg05813265	0.790317	1.11883e-200	0.791417	2.39955e-207	0.147417	7.71654e-13
Whole Blood	CD8+ T Cell	chr10:95714614:G:A	cg15718325	1.01538	5.04364e-226	1.01979	3.53276e-236	0.202585	2.56801e-17
Whole Blood	CD8+ T Cell	chr10:95933832:T:C	cg19681037	1.41969	0	1.41319	0	-0.145051	1.42569e-13
Whole Blood	CD8+ T Cell	chr10:100481456:T:C	cg07570687	1.25401	0	1.2533	0	-0.167151	1.04879e-18
Whole Blood	CD8+ T Cell	chr10:106993638:G:A	cg24795173	1.33791	0	1.34475	0	-0.166262	2.59591e-24
Whole Blood	CD8+ T Cell	chr10:109924767:C:G	cg00817464	1.11408	1.55206e-230	1.12269	7.76615e-238	0.177366	7.68351e-11
Whole Blood	CD8+ T Cell	chr10:113262017:G:T	cg08917117	0.986468	4.20271e-162	0.976615	1.09275e-166	0.204495	1.09662e-12
Whole Blood	CD8+ T Cell	chr10:113262017:G:T	cg02269146	1.04031	2.77771e-188	1.03063	6.76569e-193	0.209937	1.82864e-14
Whole Blood	CD8+ T Cell	chr10:114811522:T:C	cg07733920	1.11174	4.28332e-277	1.11965	4.60741e-287	-0.185914	1.44637e-15
Whole Blood	CD8+ T Cell	chr10:119097952:A:G	cg24772834	0.872456	7.22517e-231	0.872359	3.45516e-239	0.165818	9.26457e-16
Whole Blood	CD8+ T Cell	chr10:121015583:C:T	cg20361828	-1.24853	8.01204e-230	-1.24445	2.45139e-235	0.225402	2.81466e-13
Whole Blood	CD8+ T Cell	chr10:121447784:C:T	cg25409939	1.18472	0	1.18511	0	-0.124522	7.4636e-11
Whole Blood	CD8+ T Cell	chr10:121447784:C:T	cg17280705	1.13644	0	1.13544	0	-0.129658	8.77253e-13
Whole Blood	CD8+ T Cell	chr10:126136350:C:T	cg13674437	1.24572	0	1.24595	0	-0.150881	5.15397e-22
Whole Blood	CD8+ T Cell	chr11:2191257:G:T	cg08005462	1.31759	1.30909e-241	1.31711	2.04144e-251	-0.264509	2.10724e-18
Whole Blood	CD8+ T Cell	chr11:5442195:T:C	cg12839166	1.27357	0	1.27526	0	-0.112674	1.2291e-10
Whole Blood	CD8+ T Cell	chr11:5703344:A:G	cg05968222	0.576938	3.54212e-70	0.576646	5.80597e-73	0.229871	8.23062e-14
Whole Blood	CD8+ T Cell	chr11:10809130:C:G	cg22091621	1.20427	3.95252516672997e-323	1.20627	0	0.153856	3.5792e-13
Whole Blood	CD8+ T Cell	chr11:13092453:T:C	cg03361579	-1.01117	5.62209e-285	-1.01136	1.95395e-290	-0.13347	2.02459e-10
Whole Blood	CD8+ T Cell	chr11:13777136:A:G	cg12363607	0.885099	4.61531e-171	0.883902	3.50551e-176	0.184379	2.45375e-12
Whole Blood	CD8+ T Cell	chr11:16995868:G:A	cg15084286	0.412007	1.33401e-31	0.40958	2.9787e-32	0.211348	8.45228e-11
Whole Blood	CD8+ T Cell	chr11:33019792:C:T	cg08349108	0.631828	7.5049e-105	0.630666	2.10199e-107	-0.160165	1.69207e-10
Whole Blood	CD8+ T Cell	chr11:57042862:C:T	cg00148608	-0.562171	8.66826e-81	-0.562076	1.34577e-83	-0.186719	3.49272e-12
Whole Blood	CD8+ T Cell	chr11:60071148:T:G	cg18774435	-0.95265	5.93389e-243	-0.952904	2.02792e-248	-0.145414	3.84338e-11
Whole Blood	CD8+ T Cell	chr11:68430784:A:G	cg08273091	0.986193	5.66647e-150	0.972643	4.44057e-151	0.220283	2.36916e-12
Whole Blood	CD8+ T Cell	chr11:71558640:A:C	cg07136909	-1.19449	0	-1.19766	0	0.156908	3.7237e-16
Whole Blood	CD8+ T Cell	chr11:72607589:G:A	cg09245312	1.15308	0	1.1551	0	0.147554	8.29409e-13
Whole Blood	CD8+ T Cell	chr11:72752929:A:G	cg10317600	1.42203	4.10768e-229	1.44145	6.36705e-239	-0.234439	2.47806e-13
Whole Blood	CD8+ T Cell	chr11:73907479:C:T	cg21449673	1.33444	0	1.33278	0	-0.221323	3.65422e-28
Whole Blood	CD8+ T Cell	chr11:77129926:C:T	cg08036798	1.26269	1.17086e-202	1.27321	2.43768e-210	-0.226019	6.53832e-12
Whole Blood	CD8+ T Cell	chr11:78214187:C:G	cg01107450	1.23817	0	1.24993	0	-0.125133	2.42216e-10
Whole Blood	CD8+ T Cell	chr11:111419757:G:T	cg12912139	-1.16948	3.53842e-271	-1.1663	1.03037e-276	0.168235	3.4658e-12
Whole Blood	CD8+ T Cell	chr11:112138070:G:A	cg06646484	1.1903	3.43875e-259	1.19986	1.94246e-267	-0.198278	4.41628e-13
Whole Blood	CD8+ T Cell	chr11:115807903:C:T	cg09209543	-0.677703	1.48379e-96	-0.677037	1.17304e-100	-0.233401	4.00376e-15
Whole Blood	CD8+ T Cell	chr11:118618067:A:C	cg10643017	1.1043	0	1.10102	0	-0.0901688	3.82881e-11
Whole Blood	CD8+ T Cell	chr11:120295233:A:G	cg12869830	-1.38836	0	-1.39705	0	0.175432	5.44814e-13
Whole Blood	CD8+ T Cell	chr11:121137068:G:A	cg23716564	-0.128528	0.000453975	-0.110522	0.00219113	0.253312	1.47205e-11
Whole Blood	CD8+ T Cell	chr11:128194953:G:A	cg25130471	0.580921	1.06509e-94	0.605946	7.57533e-105	-0.20262	6.57527e-15
Whole Blood	CD8+ T Cell	chr12:3690551:T:C	cg02554272	-0.436742	4.12367e-101	-0.431707	4.48303e-102	-0.126928	1.9967e-11
Whole Blood	CD8+ T Cell	chr12:3713674:C:T	cg17662445	-1.29466	0	-1.29219	0	-0.155903	4.46871e-16
Whole Blood	CD8+ T Cell	chr12:3713674:C:T	cg14341378	-1.32579	0	-1.32328	0	-0.187194	3.16295e-21
Whole Blood	CD8+ T Cell	chr12:3729251:T:C	cg17840421	-0.60011	9.93541e-169	-0.59539	1.18896e-172	-0.143788	5.90518e-15
Whole Blood	CD8+ T Cell	chr12:3962735:T:G	cg15945527	1.23734	0	1.23684	0	-0.160617	2.15818e-16
Whole Blood	CD8+ T Cell	chr12:7756264:C:T	cg07195891	-1.24429	0	-1.24849	0	0.182173	1.44464e-17
Whole Blood	CD8+ T Cell	chr12:15578605:T:C	cg14101998	1.16724	0	1.15463	0	-0.158837	2.64519e-17
Whole Blood	CD8+ T Cell	chr12:27478912:G:T	cg02798631	1.27059	0	1.27384	0	-0.129291	1.97471e-10
Whole Blood	CD8+ T Cell	chr12:31662662:G:A	cg23008279	1.51407	0	1.51929	0	-0.241703	1.9506e-19
Whole Blood	CD8+ T Cell	chr12:47356698:T:C	cg04259259	1.1985	0	1.20542	0	-0.158478	4.31773e-15
Whole Blood	CD8+ T Cell	chr12:47664996:T:G	cg03842843	-1.18489	1.4388e-212	-1.17927	5.86722e-217	-0.216618	1.05578e-12
Whole Blood	CD8+ T Cell	chr12:48496125:G:A	cg05630470	-1.09347	4.24311e-227	-1.10043	1.48888e-234	-0.184654	4.45625e-12
Whole Blood	CD8+ T Cell	chr12:49566768:C:A	cg12063124	1.24434	6.68485e-160	1.25827	3.83905e-166	0.241508	2.50402e-10
Whole Blood	CD8+ T Cell	chr12:56928487:T:A	cg17849591	1.27663	0	1.28145	0	-0.175096	6.88042e-17
Whole Blood	CD8+ T Cell	chr12:78977680:C:T	cg16495154	-1.23131	2.71548e-307	-1.22469	7.65619053591153e-311	0.150206	1.20649e-10
Whole Blood	CD8+ T Cell	chr12:96951080:C:T	cg00481382	-1.22334	0	-1.22585	0	0.122362	7.98445e-11
Whole Blood	CD8+ T Cell	chr12:115792257:G:C	cg13622788	1.11037	5.53159e-301	1.10972	1.4277e-307	0.148333	1.01492e-11
Whole Blood	CD8+ T Cell	chr12:121212659:A:G	cg22146523	1.10213	0	1.09955	0	0.140071	4.13825e-17
Whole Blood	CD8+ T Cell	chr12:123992014:C:T	cg25459280	1.35408	0	1.35396	0	-0.127422	9.77944e-14
Whole Blood	CD8+ T Cell	chr12:124681500:A:G	cg16223899	1.04349	0	1.04626	0	0.155942	2.65118e-17
Whole Blood	CD8+ T Cell	chr12:131571156:A:G	cg04155630	-0.522656	2.9977e-126	-0.52639	8.05694e-131	0.128701	2.21811e-10
Whole Blood	CD8+ T Cell	chr13:19944266:A:C	cg03830181	-0.827711	3.89255e-140	-0.821209	9.71121e-142	0.185279	3.16802e-10
Whole Blood	CD8+ T Cell	chr13:26974237:A:G	cg01501399	0.617939	5.86503e-123	0.612809	2.855e-125	0.162294	1.27743e-12
Whole Blood	CD8+ T Cell	chr13:33260291:G:A	cg15234627	1.4565	0	1.46735	0	-0.195149	8.25225e-21
Whole Blood	CD8+ T Cell	chr13:39546239:C:T	cg10566012	-0.546122	3.89264e-107	-0.550067	1.64157e-111	0.148306	1.06168e-10
Whole Blood	CD8+ T Cell	chr13:46526964:G:A	cg04315865	0.972316	7.42567e-295	0.972473	3.06491e-303	-0.13759	3.20351e-13
Whole Blood	CD8+ T Cell	chr13:50094344:G:A	cg20293942	1.33461	1.2558e-211	1.35513	1.54601e-219	-0.222982	1.0949e-10
Whole Blood	CD8+ T Cell	chr13:50071028:T:C	cg23104954	1.26465	2.19153e-186	1.28555	3.84293e-195	-0.241498	1.50657e-11
Whole Blood	CD8+ T Cell	chr13:95531043:C:T	cg16890091	0.766957	6.00203e-183	0.772446	3.39396e-189	-0.14655	6.08115e-11
Whole Blood	CD8+ T Cell	chr13:100593961:A:G	cg17474649	1.33791	0	1.34084	0	-0.179696	1.11301e-14
Whole Blood	CD8+ T Cell	chr13:112888145:C:T	cg17842918	1.34698	7.52778e-230	1.35906	1.57064e-238	-0.222588	1.47732e-12
Whole Blood	CD8+ T Cell	chr13:112888145:C:T	cg11462099	1.39905	3.53361e-266	1.41182	4.30629e-278	-0.236699	3.19791e-16
Whole Blood	CD8+ T Cell	chr13:113403397:G:A	cg16041981	-0.756013	1.02916e-181	-0.757054	1.92964e-187	-0.154487	7.87648e-13
Whole Blood	CD8+ T Cell	chr14:32966389:G:A	cg10727171	1.25263	7.55607e-279	1.26052	4.27364e-288	-0.188512	1.19293e-13
Whole Blood	CD8+ T Cell	chr14:32966389:G:A	cg11787167	1.26407	6.43358e-279	1.27479	2.06722e-292	-0.219953	6.15831e-18
Whole Blood	CD8+ T Cell	chr14:52265555:T:G	cg00362854	0.765828	1.83528e-104	0.782093	5.52197e-111	0.228836	4.57651e-12
Whole Blood	CD8+ T Cell	chr14:58572450:G:A	cg14832378	-1.23912	0	-1.23096	0	0.208554	2.88874e-22
Whole Blood	CD8+ T Cell	chr14:59395906:T:C	cg11247712	1.18792	0	1.19173	0	-0.142977	4.10462e-29
Whole Blood	CD8+ T Cell	chr14:63967223:C:T	cg13693826	-0.683102	5.65094e-64	-0.683387	7.91421e-66	-0.242478	4.69116e-10
Whole Blood	CD8+ T Cell	chr14:68283210:G:A	cg18825221	-1.2691	0	-1.26983	0	0.136392	4.00634e-17
Whole Blood	CD8+ T Cell	chr14:76912344:C:T	cg13246055	1.40075	0	1.4035	0	-0.170641	2.79433e-25
Whole Blood	CD8+ T Cell	chr14:77104734:C:T	cg07336045	1.16767	0	1.1648	0	0.129441	9.65143e-14
Whole Blood	CD8+ T Cell	chr14:83972252:G:A	cg23311967	-0.0555584	0.0662219	-0.0594558	0.0455926	0.199803	1.26246e-10
Whole Blood	CD8+ T Cell	chr14:94052853:C:T	cg27560391	-1.26746	0	-1.26772	0	0.116081	6.31421e-12
Whole Blood	CD8+ T Cell	chr14:97774477:C:T	cg24919907	-1.16979	7.82164e-243	-1.16086	1.1928e-260	-0.323795	3.90905e-35
Whole Blood	CD8+ T Cell	chr14:97774477:C:T	cg09398595	-1.10105	3.19498e-225	-1.09281	1.38009e-237	-0.285561	1.98418e-27
Whole Blood	CD8+ T Cell	chr14:100651112:T:C	cg00992253	1.24695	0	1.24712	0	-0.112656	5.83724e-16
Whole Blood	CD8+ T Cell	chr14:100940838:C:G	cg12903400	-1.15627	4.7022e-276	-1.15882	1.91362e-283	-0.167887	6.54246e-13
Whole Blood	CD8+ T Cell	chr15:32854924:A:C	cg20196924	1.12856	3.84191e-216	1.13833	5.42872e-223	-0.184324	1.53856e-10
Whole Blood	CD8+ T Cell	chr15:33102359:T:A	cg02025737	-0.894753	3.08519e-211	-0.890821	7.54149e-215	-0.155787	9.96088e-12
Whole Blood	CD8+ T Cell	chr15:40916692:T:G	cg01646068	-0.441565	4.77487e-46	-0.44336	9.12254e-48	0.180926	2.2682e-10
Whole Blood	CD8+ T Cell	chr15:42056460:C:T	cg21824045	1.21315	2.17851e-273	1.22752	3.03899e-286	0.206122	1.3432e-15
Whole Blood	CD8+ T Cell	chr15:43525854:G:A	cg11036485	-1.17794	1.06908e-243	-1.17954	6.24317e-249	0.168437	5.39831e-10
Whole Blood	CD8+ T Cell	chr15:48605219:G:A	cg05697527	1.16312	0	1.16927	0	-0.179003	4.74401e-25
Whole Blood	CD8+ T Cell	chr15:49563592:C:T	cg11799851	0.521664	4.66511e-43	0.529804	1.63531e-45	0.231012	3.06966e-10
Whole Blood	CD8+ T Cell	chr15:50065546:G:T	cg22706981	1.08278	0	1.08599	0	-0.123849	3.37699e-15
Whole Blood	CD8+ T Cell	chr15:52370725:G:C	cg16711522	-1.27457	2.32192e-253	-1.29095	6.49044e-264	0.229282	2.55725e-14
Whole Blood	CD8+ T Cell	chr15:64877573:G:T	cg05000177	1.13414	1.04904e-196	1.1449	1.21828e-203	-0.194006	9.17876e-11
Whole Blood	CD8+ T Cell	chr15:74655722:A:G	cg17181940	1.22152	0	1.22356	0	-0.180089	2.57915e-28
Whole Blood	CD8+ T Cell	chr15:85549136:A:G	cg07350262	0.692116	1.05259e-212	0.693037	2.13929e-218	0.120761	1.36746e-11
Whole Blood	CD8+ T Cell	chr15:85605928:G:A	cg26358968	0.70461	4.65013e-115	0.706998	3.21948e-120	0.190455	1.07789e-11
Whole Blood	CD8+ T Cell	chr15:89069996:T:G	cg22446784	1.28178	0	1.28522	0	-0.0975688	3.05989e-13
Whole Blood	CD8+ T Cell	chr15:89234844:G:A	cg27640114	0.694339	1.13136e-122	0.692324	8.67108e-127	0.203507	8.07403e-15
Whole Blood	CD8+ T Cell	chr15:91603114:T:C	cg26541160	-0.307854	1.27933e-23	-0.305064	6.0648e-24	-0.198562	6.96982e-11
Whole Blood	CD8+ T Cell	chr15:95759558:G:A	cg00882281	1.17761	8.71944e-166	1.19963	8.80147e-175	0.267804	2.25337e-12
Whole Blood	CD8+ T Cell	chr15:96869618:G:A	cg18345561	-0.728124	2.26157e-76	-0.729442	6.19769e-79	0.245266	4.19765e-11
Whole Blood	CD8+ T Cell	chr15:99474974:C:T	cg24309107	1.33233	0	1.34515	0	-0.252372	3.95871e-31
Whole Blood	CD8+ T Cell	chr16:1828491:G:A	cg16246842	0.79154	1.33102e-94	0.793288	2.61193e-98	0.263638	2.16699e-13
Whole Blood	CD8+ T Cell	chr16:2973604:A:G	cg12838631	-1.34087	0	-1.34299	0	0.167355	2.32223e-14
Whole Blood	CD8+ T Cell	chr16:14303579:T:C	cg06916001	0.79764	1.07638e-125	0.799863	1.82701e-131	-0.223874	9.05487e-15
Whole Blood	CD8+ T Cell	chr16:14303579:T:C	cg00928596	0.831158	4.37688e-125	0.833474	8.44981e-131	-0.229653	2.74455e-14
Whole Blood	CD8+ T Cell	chr16:15617285:A:G	cg08627527	-0.971676	9.91365e-167	-0.97832	1.00649e-172	0.191	1.72704e-11
Whole Blood	CD8+ T Cell	chr16:19557372:A:C	cg22368454	-1.05118	1.42404824913997e-310	-1.05478	1.95281422781336e-318	0.150014	1.06136e-11
Whole Blood	CD8+ T Cell	chr16:19716676:A:G	cg03615426	1.3487	0	1.34805	0	-0.153393	6.32656e-17
Whole Blood	CD8+ T Cell	chr16:19716676:A:G	cg10266221	1.30767	0	1.30689	0	-0.150339	2.64025e-18
Whole Blood	CD8+ T Cell	chr16:22975802:G:A	cg19203173	0.970732	2.43474e-215	0.977005	3.04363e-222	0.160919	1.56937e-10
Whole Blood	CD8+ T Cell	chr16:48627578:G:A	cg00766382	0.795172	2.71626e-206	0.787604	1.3456e-208	0.138101	6.67033e-12
Whole Blood	CD8+ T Cell	chr16:48605193:T:C	cg01723420	-1.27411	0	-1.27965	0	0.0808279	4.56947e-12
Whole Blood	CD8+ T Cell	chr16:67617976:G:A	cg09101151	0.896489	1.85533e-181	0.890442	6.09144e-184	-0.15335	1.86848e-09
Whole Blood	CD8+ T Cell	chr16:68416559:C:G	cg15035774	1.20347	0	1.19405	0	-0.126913	4.86344e-10
Whole Blood	CD8+ T Cell	chr16:74701250:G:A	cg10284440	0.800533	1.09042e-220	0.803257	2.43693e-227	-0.131032	7.72707e-11
Whole Blood	CD8+ T Cell	chr16:77287547:G:A	cg05007098	-0.149654	3.88949e-06	-0.143771	6.08571e-06	0.226228	1.42267e-11
Whole Blood	CD8+ T Cell	chr16:82181301:G:C	cg05247190	-1.06581	0	-1.06747	0	0.127564	2.47782e-13
Whole Blood	CD8+ T Cell	chr16:89517777:G:T	cg02670718	-1.32026	6.80226e-203	-1.33149	9.12097e-210	0.235293	2.08262e-11
Whole Blood	CD8+ T Cell	chr17:3773694:C:G	cg25036312	1.36392	0	1.37749	0	-0.190054	1.40754e-15
Whole Blood	CD8+ T Cell	chr17:4922946:G:A	cg19427746	-0.549441	4.41292e-29	-0.538452	6.06554e-29	-0.303154	7.86735e-11
Whole Blood	CD8+ T Cell	chr17:6754783:A:C	cg15154249	1.11504	0	1.10987	0	0.15454	5.04001e-15
Whole Blood	CD8+ T Cell	chr17:28916462:C:T	cg11292644	-0.993775	3.37299e-260	-0.998296	1.428e-266	0.132973	3.74777e-10
Whole Blood	CD8+ T Cell	chr17:30825203:G:A	cg16831185	0.527871	2.62112e-87	0.533077	5.89568e-91	-0.150272	2.71828e-10
Whole Blood	CD8+ T Cell	chr17:35901470:C:T	cg09536176	1.51093	5.45746e-297	1.51967	3.68008e-304	-0.1792	2.5125e-10
Whole Blood	CD8+ T Cell	chr17:39911280:A:G	cg10909506	0.84247	5.61402e-143	0.838236	5.84514e-146	0.17279	2.32056e-10
Whole Blood	CD8+ T Cell	chr17:39973253:G:A	cg21230266	1.23038	0	1.23069	0	-0.105481	4.10851e-10
Whole Blood	CD8+ T Cell	chr17:43773321:C:G	cg26893861	1.3313	0	1.33136	0	0.144233	5.29979e-13
Whole Blood	CD8+ T Cell	chr17:47745861:A:C	cg05266212	1.1782	0	1.17809	0	-0.152322	2.37229e-15
Whole Blood	CD8+ T Cell	chr17:47844540:T:C	cg02219949	1.15685	0	1.15674	0	-0.10603	3.96587e-10
Whole Blood	CD8+ T Cell	chr17:49060963:G:A	cg14484274	1.01176	9.99297e-245	0.998871	5.0476e-247	0.176308	1.35706e-13
Whole Blood	CD8+ T Cell	chr17:58478384:G:C	cg26370237	-1.28301	0	-1.27935	0	0.205149	1.95439e-40
Whole Blood	CD8+ T Cell	chr17:66275606:T:C	cg23552820	-1.03577	6.85859e-301	-1.03974	6.22217440478718e-316	-0.186115	2.16827e-21
Whole Blood	CD8+ T Cell	chr17:74478925:T:C	cg24347260	-0.0603303	0.0643471	-0.071482	0.0259519	0.222059	7.8691e-12
Whole Blood	CD8+ T Cell	chr17:74475270:C:T	cg10953317	0.777666	6.5767e-161	0.766036	6.08123e-161	0.162563	3.20472e-11
Whole Blood	CD8+ T Cell	chr17:74463155:A:G	cg12118246	0.917033	2.33524e-231	0.903711	1.23499e-235	0.19122	6.99709e-18
Whole Blood	CD8+ T Cell	chr17:74475270:C:T	cg24169812	0.853227	5.46283e-173	0.839111	5.76015e-174	0.188472	1.40992e-13
Whole Blood	CD8+ T Cell	chr17:74475270:C:T	cg24375215	0.795441	1.27839e-152	0.781568	6.7841e-154	0.20522	2.13794e-15
Whole Blood	CD8+ T Cell	chr17:74463155:A:G	cg04150062	0.996357	1.84489e-272	0.98558	1.58861e-275	0.158408	9.54962e-14
Whole Blood	CD8+ T Cell	chr17:74475270:C:T	cg12331932	0.951536	2.14836e-215	0.940084	3.57758e-216	0.160436	4.35264e-11
Whole Blood	CD8+ T Cell	chr17:74475270:C:T	cg02554050	0.94768	3.17423e-216	0.935375	5.87111e-218	0.176586	2.46869e-13
Whole Blood	CD8+ T Cell	chr17:74464710:G:C	cg05592035	0.989416	7.15171e-237	0.976723	1.30215e-239	0.179645	2.37878e-14
Whole Blood	CD8+ T Cell	chr17:77667194:T:C	cg15472659	-1.18444	0	-1.18091	0	0.113522	1.0131e-10
Whole Blood	CD8+ T Cell	chr17:82739892:G:T	cg07099000	-0.672192	2.66121e-79	-0.672379	1.22647e-82	-0.259322	7.30061e-14
Whole Blood	CD8+ T Cell	chr17:82851229:T:G	cg15853299	0.899736	1.91404e-143	0.893516	1.80636e-145	0.194406	4.59765e-11
Whole Blood	CD8+ T Cell	chr18:3246393:C:G	cg24325215	-0.666141	3.07589e-70	-0.660109	2.95884e-71	-0.219792	6.60417e-11
Whole Blood	CD8+ T Cell	chr18:6871969:T:C	cg25133652	1.06235	1.06761e-303	1.06516	1.21274241304454e-310	0.130282	5.84744e-11
Whole Blood	CD8+ T Cell	chr18:45976986:C:T	cg20630456	0.853311	1.40903e-233	0.851963	2.25349e-241	0.156461	1.62489e-15
Whole Blood	CD8+ T Cell	chr18:48757541:G:A	cg17496939	1.51824	0	1.5033	0	-0.232479	1.22187e-21
Whole Blood	CD8+ T Cell	chr18:49320739:C:T	cg01529701	1.12258	1.79028e-233	1.12001	4.39222e-238	-0.180081	2.99552e-11
Whole Blood	CD8+ T Cell	chr18:49688468:G:C	cg12702760	-1.13921	0	-1.14154	0	0.134615	1.24832e-10
Whole Blood	CD8+ T Cell	chr18:50475432:C:T	cg17575976	-0.596462	8.17045e-57	-0.603434	3.26415e-61	-0.300138	4.43951e-18
Whole Blood	CD8+ T Cell	chr18:79504649:A:G	cg15678825	-0.877184	5.82864e-272	-0.883255	1.40276e-279	-0.123165	7.27109e-11
Whole Blood	CD8+ T Cell	chr19:2415496:G:A	cg16170346	1.22677	2.2241e-262	1.23866	1.72037e-270	-0.174356	3.44968e-11
Whole Blood	CD8+ T Cell	chr19:13621551:A:G	cg17089917	1.18581	2.86941469529096e-318	1.18158	2.96439387504748e-322	0.142894	3.6986e-11
Whole Blood	CD8+ T Cell	chr19:32395376:C:G	cg18376779	-1.52568	5.02809e-234	-1.53849	1.19175e-241	-0.234339	2.12472e-11
Whole Blood	CD8+ T Cell	chr19:46426768:C:A	cg17513925	1.22508	0	1.23138	0	-0.107912	2.54994e-10
Whole Blood	CD8+ T Cell	chr19:51477630:T:C	cg12550569	1.36626	0	1.36853	0	-0.209893	6.07592e-18
Whole Blood	CD8+ T Cell	chr19:51477630:T:C	cg22110428	1.44647	0	1.44798	0	-0.186371	6.15404e-17
Whole Blood	CD8+ T Cell	chr20:14836372:T:G	cg07191562	0.657717	4.4246e-74	0.658751	1.74686e-76	0.22138	1.50183e-10
Whole Blood	CD8+ T Cell	chr20:20064718:C:T	cg24951137	1.28951	3.13565e-255	1.2921	1.61234e-261	-0.181813	2.1434e-10
Whole Blood	CD8+ T Cell	chr20:24820333:T:C	cg22963164	1.02989	3.37468e-181	1.03878	1.31022e-188	0.193362	6.72022e-11
Whole Blood	CD8+ T Cell	chr20:33005123:C:A	cg08642068	1.40145	0	1.40526	0	-0.16543	2.36333e-11
Whole Blood	CD8+ T Cell	chr20:35146458:C:G	cg21748271	1.22123	0	1.22301	0	-0.129267	3.49532e-17
Whole Blood	CD8+ T Cell	chr20:36124464:G:A	cg15561614	-0.701886	4.27015e-112	-0.706715	1.22835e-116	-0.174717	2.48137e-10
Whole Blood	CD8+ T Cell	chr20:38355270:C:G	cg18979491	-0.481303	9.39074e-61	-0.47023	3.797e-60	0.170937	2.10793e-10
Whole Blood	CD8+ T Cell	chr20:45304556:C:T	cg04305670	-1.5036	4.24178e-236	-1.50239	3.3362e-242	0.246399	2.15003e-12
Whole Blood	CD8+ T Cell	chr20:46406574:T:C	cg10152715	0.794657	7.52508e-76	0.815456	7.51302e-82	0.276411	6.96571e-13
Whole Blood	CD8+ T Cell	chr20:48749180:G:C	cg18704705	0.987412	6.53068e-273	0.984855	9.4999e-278	-0.129808	2.35011e-10
Whole Blood	CD8+ T Cell	chr20:48749180:G:C	cg13619283	1.09136	0	1.08883	0	-0.123496	1.82067e-11
Whole Blood	CD8+ T Cell	chr20:49040144:A:T	cg04852625	0.87344	8.27296e-184	0.869835	7.42899e-190	0.200822	4.43658e-16
Whole Blood	CD8+ T Cell	chr20:48989075:C:A	cg11749817	1.134	0	1.14011	0	-0.135896	1.25279e-18
Whole Blood	CD8+ T Cell	chr20:50872643:G:T	cg20785120	1.37513	0	1.38017	0	-0.112893	1.26685e-14
Whole Blood	CD8+ T Cell	chr20:53875689:G:T	cg15878616	0.322839	1.62884e-38	0.311372	4.17508e-37	0.155113	1.34251e-10
Whole Blood	CD8+ T Cell	chr20:62378381:C:T	cg16585368	0.987787	4.55392e-240	0.98844	2.02924e-245	0.146779	1.49111e-10
Whole Blood	CD8+ T Cell	chr20:63759661:C:T	cg04977659	0.962357	7.42035e-265	0.961176	1.00839e-270	0.14049	5.47376e-12
Whole Blood	CD8+ T Cell	chr21:21467098:C:T	cg19426693	-0.88073	1.37567e-137	-0.878958	3.32343e-141	-0.202212	5.83043e-12
Whole Blood	CD8+ T Cell	chr21:42137588:A:C	cg09727148	1.13375	0	1.13201	0	0.183906	9.04125e-22
Whole Blood	CD8+ T Cell	chr21:46024508:C:A	cg05607391	1.17697	0	1.17769	0	0.141059	8.667e-11
Whole Blood	CD8+ T Cell	chr21:46540580:T:C	cg06114238	-1.08823	2.9229e-264	-1.09331	4.52659e-278	-0.220276	7.77324e-21
Whole Blood	CD8+ T Cell	chr22:20145778:C:T	cg03062670	-1.34691	4.14657e-180	-1.34981	2.18378e-189	-0.353748	2.96744e-19
Whole Blood	CD8+ T Cell	chr22:20083433:C:A	cg00798643	-1.15326	3.80064e-139	-1.1534	3.13218e-146	-0.355162	1.16023e-18
Whole Blood	CD8+ T Cell	chr22:24466770:A:G	cg19558654	-0.933244	0	-0.930402	0	-0.126982	1.68924e-14
[truncated: 1,153 more rows]

## Sheet: Supplementary Table 3
Supplementary Table 3. List of CpGs mapped to imQTLs that were not mapped to mQTLs in matching tissues
Tissue	CpG ID
Colon	cg27624466
Colon	cg12521152
Colon	cg07179016
Colon	cg05046020
Colon	cg08491091
Colon	cg14990413
Colon	cg21130420
Colon	cg15462953
Colon	cg07471365
Colon	cg07069742
Colon	cg06823220
Colon	cg05256313
Colon	cg04691961
Colon	cg21233763
Colon	cg05267242
Colon	cg00096603
Colon	cg02293354
Colon	cg16361253
Colon	cg08570639
Colon	cg01314165
Colon	cg02401247
Colon	cg12562418
Colon	cg00031705
Colon	cg10646924
Colon	cg06411121
Colon	cg15707110
Colon	cg18988395
Colon	cg12218330
Colon	cg24007924
Colon	cg04687190
Colon	cg13782214
Colon	cg15037851
Colon	cg00929254
Colon	cg09288312
Colon	cg02172658
Colon	cg16726577
Colon	cg02861197
Colon	cg23941216
Colon	cg10370305
Colon	cg23879118
Colon	cg20872261
Colon	cg25926078
Colon	cg27435644
Colon	cg10963817
Colon	cg26269162
Colon	cg14111612
Colon	cg04093349
Colon	cg20716080
Colon	cg22576950
Colon	cg01075459
Colon	cg16096942
Colon	cg21394589
Colon	cg19894312
Colon	cg03126561
Colon	cg24610561
Colon	cg22720392
Colon	cg05968400
Colon	cg12617456
Colon	cg06200244
Colon	cg13206224
Colon	cg20590068
Colon	cg09367290
Colon	cg02054252
Colon	cg18754695
Colon	cg21393163
Colon	cg24013761
Colon	cg18695564
Colon	cg13652008
Colon	cg08168884
Colon	cg06580551
Colon	cg23035323
Colon	cg02591638
Colon	cg03373132
Colon	cg26221442
Colon	cg16754460
Colon	cg09862711
Colon	cg01672320
Colon	cg13848087
Colon	cg14223669
Colon	cg00957609
Lung	cg12763828
Lung	cg00146027
Lung	cg01727419
Lung	cg21314629
Lung	cg26072390
Lung	cg06277666
Lung	cg26673516
Lung	cg00831276
Ovary	cg05697754
Ovary	cg16279999
Whole Blood	cg04172761
Whole Blood	cg21593885
Whole Blood	cg04566160
Whole Blood	cg00586123
Whole Blood	cg14257335

## Sheet: Supplementary Table 4
Supplementary Table 4. Association estimates for candidate cell type-specific imQTLs
Tissue	Cell Type	Variant ID	CpG ID	Marginal Effect		Main Effect		Interaction Effect
				β	p-value	β	p-value	β	p-value
Colon	Epithelial cell	chr1:1130902:A:G	cg07179016	-0.13366	0.0173946	-0.109507	0.0132353	-0.481094	7.18948e-20
Colon	Epithelial cell	chr1:175818304:A:G	cg08491091	-0.0466154	0.493306	-0.102995	0.0721229	-0.499951	1.71648e-14
Colon	Epithelial cell	chr2:113845426:G:T	cg21130420	-0.0492912	0.496929	-0.033525	0.576591	-0.527411	5.91728e-16
Colon	Epithelial cell	chr3:117860735:T:A	cg13179828	-0.296265	7.76943e-05	-0.238282	0.000251845	-0.475993	9.57052e-13
Colon	Epithelial cell	chr3:122894432:C:T	cg06823220	0.12693	0.0736594	0.12257	0.0430134	-0.538701	9.20076e-14
Colon	Epithelial cell	chr3:125207904:G:C	cg05256313	-0.159071	0.0253842	-0.113027	0.0446125	-0.577981	1.7052e-17
Colon	Epithelial cell	chr3:133736597:A:G	cg17775713	0.291964	2.72736e-05	0.313219	1.388e-07	0.495573	1.39048e-14
Colon	Epithelial cell	chr3:195847655:C:T	cg21233763	0.0979955	0.0668746	0.092973	0.0464821	0.374427	5.04574e-12
Colon	Epithelial cell	chr7:111855897:G:A	cg02401247	-0.198023	4.12855e-05	-0.150212	0.00019983	-0.337996	2.47822e-12
Colon	Epithelial cell	chr8:11795519:A:G	cg09611679	-0.321843	4.55217e-08	-0.332279	8.77641e-11	-0.445565	8.8789e-14
Colon	Epithelial cell	chr8:66117705:C:G	cg10646924	0.101934	0.27509	0.01263	0.874712	0.60776	7.72671e-14
Colon	Epithelial cell	chr9:4151202:C:A	cg18988395	0.1145	0.112371	0.0385894	0.535478	0.470299	1.20576e-11
Colon	Epithelial cell	chr9:95782745:G:T	cg12218330	0.080142	0.0430228	0.0923182	0.00544696	0.308097	2.30206e-15
Colon	Epithelial cell	chr10:3655659:G:T	cg23307878	-0.281848	5.17972e-18	-0.289393	1.48749e-22	-0.195075	5.01778e-12
Colon	Epithelial cell	chr10:77770455:C:T	cg13782214	-0.175196	0.0179733	-0.184619	0.00504972	-0.458167	6.62051e-11
Colon	Epithelial cell	chr11:75581556:A:G	cg09786210	0.00507991	0.945156	0.0169199	0.790879	-0.530428	2.06664e-12
Colon	Epithelial cell	chr12:6198313:GCTCTGC:G	cg25926078	0.0702283	0.249833	0.0335951	0.516982	0.43136	2.48616e-13
Colon	Epithelial cell	chr12:119333897:G:A	cg27435644	0.112189	0.0296228	0.0743106	0.100783	0.391436	8.96722e-12
Colon	Epithelial cell	chr13:36920497:C:T	cg06559111	0.438103	7.2748e-08	0.494894	1.53725e-12	0.617458	6.10731e-16
Colon	Epithelial cell	chr13:112907038:C:T	cg26269162	-0.226505	0.000293949	-0.205736	0.000182108	-0.473726	6.0047e-12
Colon	Epithelial cell	chr15:32899146:AAAAC:A	cg14111612	0.206244	0.0031064	0.187533	0.00102302	0.580848	4.14697e-17
Colon	Epithelial cell	chr15:66716105:A:G	cg04093349	-0.226666	0.0108129	-0.188238	0.0149239	-0.639189	2.76973e-12
Colon	Epithelial cell	chr17:1995506:C:A	cg09218348	0.265369	4.49903e-10	0.300314	1.49198e-15	0.306063	2.10538e-13
Colon	Epithelial cell	chr20:45427440:C:CGTG	cg21394589	-0.0452425	0.41293	0.00472814	0.924328	-0.375323	5.94641e-11
Colon	Myeloid cell	chr19:612234:A:G	cg18754695	-0.00760216	0.886914	0.0125384	0.785103	-0.312426	2.06439e-11
Colon	Stromal cell	chr7:159079053:G:A	cg16754460	0.0674069	0.50783	0.00516439	0.952162	0.65717	6.52367e-15
Colon	Stromal cell	chr15:32899146:AAAAC:A	cg14111612	0.206244	0.0031064	0.175699	0.00412287	-0.466882	8.17583e-12
Colon	Stromal cell	chr21:33278948:T:C	cg25745742	-0.216632	2.79716e-07	-0.192604	2.58765e-07	-0.263185	6.01619e-11
Whole Blood	Neutrophil	chr1:232185271:C:G	cg11924352	0.173176	1.8834e-10	0.171845	6.70569e-11	0.194385	2.18217e-13
Whole Blood	Neutrophil	chr22:20500999:G:A	cg14257335	-0.0766498	0.0736742	-0.0902872	0.0315619	-0.269029	1.81151e-11

## Sheet: Supplementary Table 5
Supplementary Table 5. Candidate cell type-specific imQTLs that were also reported as cell type-specific eQTLs in previous single-cell studies.
Tissue	Cell Type	Variant ID	rsID	CpG ID	Marginal Effect		Interaction Effect		Gene mapped to cell type-specific eQTL	Cell type of single-cell eQTL	Single cell eQTL association		PUBMED ID of single-cell eQTL study
					β	p-value	β	p-value			β	p-value
Colon	Epithelial cell	chr1:1130902:A:G	rs10907181	cg07179016	-0.13366	0.0173946	-0.481094	7.18948e-20	C1orf159	Inhibitory Neurons	-0.331	2.19453e-06	35915177
Colon	Epithelial cell	chr2:113845426:G:T	rs4241126	cg21130420	-0.0492912	0.496929	-0.527411	5.91728e-16	AC104653.1	CD4+ Naive T	-1.19873	7.56639e-32	35618845
Colon	Epithelial cell	chr3:122894432:C:T	rs3732829	cg06823220	0.12693	0.0736594	-0.538701	9.20076e-14	LINC02035	Monocyte (Mono)	0.65	2.734e-06	35213211
Colon	Epithelial cell	chr3:133736597:A:G	rs9824479	cg17775713	0.291964	2.72736e-05	0.495573	1.39048e-14	TF	Astrocyte-like Cells	-0.30988	0.000219544	33664506
Colon	Epithelial cell	chr3:195847655:C:T	rs12632610	cg21233763	0.0979955	0.0668746	0.374427	5.04574e-12	LINC00969	Proliferating Floor Plate Progenitors	0.38609	0.000379982	33664506
Colon	Epithelial cell	chr7:111855897:G:A	rs12154389	cg02401247	-0.198023	4.12855e-05	-0.337996	2.47822e-12	DOCK4	Floor Plate Progenitors	0.13074	0.000192645	33664506
Colon	Epithelial cell	chr8:11795519:A:G	rs2740447	cg09611679	-0.321843	4.55217e-08	-0.445565	8.8789e-14	FDFT1	Floor Plate Progenitors	0.25833	1.70116e-05	33664506
Colon	Epithelial cell	chr9:95782745:G:T	rs7029459	cg12218330	0.080142	0.0430228	0.308097	2.30206e-15	ERCC6L2	Proliferating Floor Plate Progenitors	-0.22057	0.000145547	33664506
Colon	Stromal cell	chr7:159079053:G:A	rs3812304	cg16754460	0.0674069	0.50783	0.65717	6.52367e-15	VIPR2	Excitatory Neurons	-0.32458	1.03643e-07	35915177
Colon	Stromal cell	chr21:33278948:T:C	rs8178484	cg25745742	-0.216632	2.79716e-07	-0.263185	6.01619e-11	IL10RB-AS1	Serotonergic-like Neurons	-0.26481	4.37709e-09	33664506
Whole Blood	Neutrophil	chr1:232185271:C:G	rs17834239	cg11924352	0.173176	1.8834e-10	0.194385	2.18217e-13	C1orf131	Excitatory Neurons	-0.16245	7.23132e-05	35915177
Whole Blood	Neutrophil	chr22:20500999:G:A	rs165798	cg14257335	-0.0766498	0.0736742	-0.269029	1.81151e-11	ZNF74	Ependymal-like 1	0.28726	0.000443696	33664506

## Sheet: Supplementary Table 6
Supplementary Table 6. Enrichment of genomic context annotations for variants mapped to imQTLs and mQTLs
Tissue	Group	Annotation	imQTL			mQTL
			logOR	SE (logOR)	p-value	logOR	SE (logOR)	p-value
Colon	Chromatin States	TssBiv	0.453294	1.00078	0.470702	1.91537	0.0470703	2.26922e-228
Colon	Chromatin States	BivFlnk	0.179845	1.00075	0.566614	2.03165	0.0390986	0
Colon	Chromatin States	EnhBiv	2.22796	0.410148	6.00433e-05	1.94531	0.0459182	2.64652e-246
Colon	Chromatin States	ReprPC	-0.487665	0.708062	0.777745	1.67219	0.0235389	0
Colon	Chromatin States	ReprPCWk	0.563459	0.124576	2.312e-05	0.961864	0.00997475	0
Colon	Chromatin States	Quies	-1.28369	0.0720873	8.65467e-67	-1.32304	0.00669619	0
Colon	Chromatin States	TssA	1.70945	0.189373	8.15725e-13	1.72589	0.0180519	0
Colon	Chromatin States	TssAFlnk	2.43506	0.180721	9.79489e-23	1.8466	0.0230179	0
Colon	Chromatin States	TxFlnk	NA	NA	NA	1.63628	0.0977568	5.19091e-42
Colon	Chromatin States	Tx	0.4009	0.221282	0.0793476	0.966447	0.0159563	0
Colon	Chromatin States	TxWk	0.889996	0.0884303	3.21954e-20	0.660845	0.00882462	0
Colon	Chromatin States	EnhG	2.24816	0.335547	7.85197e-07	1.3927	0.0485407	1.07633e-125
Colon	Chromatin States	Enh	1.77314	0.146311	7.57287e-22	1.24012	0.0175408	0
Colon	Chromatin States	ZNF/Rpts	NA	NA	NA	0.362025	0.0848251	5.24379e-05
Colon	Chromatin States	Het	-0.402143	0.448697	0.462636	-0.244227	0.0383061	3.96053e-11
Colon	CpG Island Regions	CGI	1.74078	0.192597	9.56047e-13	2.04679	0.0163338	0
Colon	CpG Island Regions	CGI/Shores/Shelves	1.48446	0.0846843	3.89856e-52	1.62653	0.00770756	0
Colon	CpG Island Regions	CGI/Shores	1.53663	0.0993853	1.82587e-38	1.73265	0.00885528	0
Colon	Regulatory Regions	TFBS	1.31744	0.0730043	1.60995e-72	1.04583	0.00668368	0
Colon	Regulatory Regions	Distal Enhancer	1.31658	0.0894662	9.42683e-38	0.83816	0.00977929	0
Colon	Regulatory Regions	Insulator	0.178362	0.448715	0.618941	0.285895	0.039467	3.7923e-12
Colon	Regulatory Regions	Promoter	2.64379	0.175596	7.18275e-27	2.12431	0.0219614	0
Colon	Regulatory Regions	Proximal Enhancer	1.97728	0.134511	3.30136e-30	1.55597	0.0153975	0
Colon	Gene Contexts	TSS1500	1.70344	0.109127	4.82926e-37	1.50332	0.0111783	0
Colon	Gene Contexts	TSS200	2.48369	0.173161	2.31427e-25	1.90371	0.0219881	0
Colon	Gene Contexts	CDS	0.556458	0.355454	0.150469	1.19741	0.0245711	0
Colon	Gene Contexts	Intron	0.37827	0.0728003	1.89177e-07	0.288637	0.00669553	0
Colon	Gene Contexts	3' UTR	1.00447	0.192555	4.49636e-06	0.903555	0.0188961	0
Colon	Gene Contexts	5' UTR	1.43865	0.232375	3.62011e-07	1.42305	0.0222394	0
Colon	Regulatory Regions	DNaseI HS	1.55485	0.0722508	3.02274e-91	0.993265	0.00711899	0
Lung	CpG Island Regions	CGI	0.779247	0.712198	0.236449	2.00842	0.0157714	0
Lung	CpG Island Regions	CGI/Shores/Shelves	0.84998	0.241387	0.00107442	1.57676	0.0073771	0
Lung	CpG Island Regions	CGI/Shores	0.940114	0.291103	0.0030372	1.69025	0.00849707	0
Lung	Regulatory Regions	TFBS	1.29802	0.170333	4.47347e-14	1.05374	0.00631384	0
Lung	Regulatory Regions	Distal Enhancer	1.68159	0.18981	2.38479e-14	0.890315	0.00907932	0
Lung	Regulatory Regions	Insulator	NA	NA	NA	0.242058	0.038033	8.0478e-10
Lung	Regulatory Regions	Promoter	1.89224	0.583646	0.0114061	2.10461	0.0210675	0
Lung	Regulatory Regions	Proximal Enhancer	1.76558	0.344536	4.29908e-05	1.56482	0.0145567	0
Lung	Chromatin States	TssBiv	NA	NA	NA	1.78204	0.172218	8.2542e-17
Lung	Chromatin States	BivFlnk	NA	NA	NA	1.70226	0.129153	1.39947e-26
Lung	Chromatin States	EnhBiv	NA	NA	NA	1.76331	0.0523889	9.64251e-162
Lung	Chromatin States	ReprPC	NA	NA	NA	1.47169	0.0381434	2.41013e-223
Lung	Chromatin States	ReprPCWk	0.556279	0.344518	0.115007	0.601594	0.0127162	0
Lung	Chromatin States	Quies	-1.37958	0.17604	7.67158e-16	-1.07109	0.00636918	0
Lung	Chromatin States	TssA	0.932054	0.712202	0.188969	1.79189	0.0184887	0
Lung	Chromatin States	TssAFlnk	NA	NA	NA	1.95982	0.034162	0
Lung	Chromatin States	TxFlnk	NA	NA	NA	1.61119	0.127615	6.66087e-25
Lung	Chromatin States	Tx	1.42501	0.265532	5.61236e-06	0.849792	0.0127229	0
Lung	Chromatin States	TxWk	0.718812	0.194954	0.000536134	0.578	0.00759668	0
Lung	Chromatin States	EnhG	2.20137	0.455416	0.000299066	1.28798	0.026985	0
Lung	Chromatin States	Enh	1.60617	0.281624	2.72197e-06	1.32304	0.0121122	0
Lung	Chromatin States	ZNF/Rpts	NA	NA	NA	0.642041	0.0393865	8.22575e-50
Lung	Chromatin States	Het	0.101553	0.328081	0.730367	-0.0748222	0.013227	1.12471e-08
Lung	Gene Contexts	TSS1500	1.36626	0.291108	6.61353e-05	1.46848	0.0107272	0
Lung	Gene Contexts	TSS200	1.70132	0.583637	0.0188328	1.87219	0.0211694	0
Lung	Gene Contexts	CDS	NA	NA	NA	1.15555	0.0237247	0
Lung	Gene Contexts	Intron	0.48415	0.171608	0.00522436	0.312981	0.00633004	0
Lung	Gene Contexts	3' UTR	-0.660003	1.00357	1	0.858804	0.0182298	0
Lung	Gene Contexts	5' UTR	0.876474	0.7122	0.205288	1.37005	0.021585	0
Lung	Regulatory Regions	DNaseI HS	1.70428	0.168439	7.48098e-22	1.01727	0.00670175	0
Whole Blood	CpG Island Regions	CGI	1.17941	0.187754	9.09201e-08	1.42718	0.0167226	0
Whole Blood	CpG Island Regions	CGI/Shores/Shelves	0.966286	0.0736199	7.5807e-32	1.24062	0.00651232	0
Whole Blood	CpG Island Regions	CGI/Shores	0.978942	0.091419	3.5821e-21	1.29751	0.00789808	0
Whole Blood	Regulatory Regions	TFBS	1.02768	0.0529841	3.7484e-81	0.745657	0.00497864	0
Whole Blood	Regulatory Regions	Distal Enhancer	1.05378	0.07058	3.05991e-40	0.630593	0.00776186	0
Whole Blood	Regulatory Regions	Insulator	-0.142805	0.378974	0.860028	0.0159864	0.0325366	0.623062
Whole Blood	Regulatory Regions	Promoter	1.31517	0.244208	6.75308e-06	1.38257	0.0236314	0
Whole Blood	Regulatory Regions	Proximal Enhancer	1.31187	0.133078	1.84285e-16	1.16861	0.0139253	0
Whole Blood	Chromatin States	TssBiv	1.34138	0.50116	0.0220963	1.39821	0.0488592	3.35539e-134
Whole Blood	Chromatin States	BivFlnk	1.08904	0.334626	0.0041203	1.48524	0.0278289	0
Whole Blood	Chromatin States	EnhBiv	1.32814	0.17628	3.72254e-10	1.39617	0.0170588	0
Whole Blood	Chromatin States	ReprPC	0.334932	0.130907	0.0141136	0.960646	0.00956203	0
Whole Blood	Chromatin States	ReprPCWk	-0.0129953	0.0609093	0.85548	0.440664	0.00518861	0
Whole Blood	Chromatin States	Quies	-1.3093	0.05714	2.78851e-95	-0.926685	0.00591866	0
Whole Blood	Chromatin States	TssA	1.28882	0.166712	1.01031e-10	1.2115	0.0170186	0
Whole Blood	Chromatin States	TssAFlnk	1.66549	0.0940816	1.98756e-46	1.17575	0.0113553	0
Whole Blood	Chromatin States	TxFlnk	1.04711	0.302885	0.00223083	1.16312	0.0280975	7.16207e-288
Whole Blood	Chromatin States	Tx	1.03467	0.0667825	6.22384e-44	0.566125	0.00737416	0
Whole Blood	Chromatin States	TxWk	1.15976	0.0533762	3.19346e-95	0.660059	0.00532021	0
Whole Blood	Chromatin States	EnhG	1.66673	0.0977484	5.23433e-43	0.899261	0.0132055	0
Whole Blood	Chromatin States	Enh	1.5327	0.0563602	6.74837e-130	0.843432	0.0063118	0
Whole Blood	Chromatin States	ZNF/Rpts	0.592768	0.259678	0.0336906	0.250099	0.0287387	4.00245e-17
Whole Blood	Chromatin States	Het	-0.952727	0.116468	4.98237e-21	-0.721925	0.00964995	0
Whole Blood	Gene Contexts	TSS1500	0.85051	0.115136	6.11801e-11	1.02363	0.0103218	0
Whole Blood	Gene Contexts	TSS200	0.861591	0.278779	0.00452236	1.19508	0.0233092	0
Whole Blood	Gene Contexts	CDS	1.46785	0.162524	1.74892e-13	1.02271	0.01952	0
Whole Blood	Gene Contexts	Intron	0.595164	0.0548205	2.29249e-28	0.343369	0.00496067	0
Whole Blood	Gene Contexts	3' UTR	0.769357	0.158546	1.50253e-05	0.739	0.0153491	0
Whole Blood	Gene Contexts	5' UTR	1.26436	0.187766	1.56804e-08	0.964737	0.0209926	0
Whole Blood	Regulatory Regions	DNaseI HS	1.02189	0.0556124	3.03616e-66	0.668715	0.00559289	0
Meta-analysis	Chromatin States	TssBiv	1.16332	0.448113	0.00943012	1.69081	0.168353	9.84097e-24
Meta-analysis	Chromatin States	BivFlnk	0.997609	0.317355	0.00166931	1.74095	0.16788	3.38677e-25
Meta-analysis	Chromatin States	EnhBiv	1.70184	0.443412	0.000124009	1.69908	0.162861	1.75873e-25
Meta-analysis	Chromatin States	ReprPC	0.217954	0.2873	0.448074	1.36748	0.212444	1.21942e-10
Meta-analysis	Chromatin States	ReprPCWk	0.321773	0.216608	0.137409	0.667983	0.154127	1.46444e-05
Meta-analysis	Chromatin States	Quies	-1.30429	0.043397	1.8854e-198	-1.10692	0.115811	1.20084e-21
Meta-analysis	Chromatin States	TssA	1.45141	0.192099	4.17117e-14	1.57637	0.183479	8.5799e-18
Meta-analysis	Chromatin States	TssAFlnk	2.03481	0.384476	1.20708e-07	1.66001	0.244927	1.22199e-11
Meta-analysis	Chromatin States	TxFlnk	1.04711	0.302885	0.000545987	1.45411	0.161664	2.36985e-19
Meta-analysis	Chromatin States	Tx	0.947077	0.277182	0.000633602	0.793803	0.118948	2.49726e-11
Meta-analysis	Chromatin States	TxWk	0.965382	0.125455	1.41452e-14	0.633005	0.0274632	1.4976e-117
Meta-analysis	Chromatin States	EnhG	1.9127	0.224541	1.61943e-17	1.19093	0.150616	2.63515e-15
Meta-analysis	Chromatin States	Enh	1.60227	0.0894688	1.00869e-71	1.13529	0.148164	1.82549e-14
Meta-analysis	Chromatin States	ZNF/Rpts	0.592768	0.259678	0.0224479	0.419317	0.12091	0.00052431
Meta-analysis	Chromatin States	Het	-0.477742	0.341149	0.161396	-0.347471	0.194412	0.0738907
Meta-analysis	CpG Island Regions	CGI	1.38763	0.252671	3.9774e-08	1.82749	0.200433	7.67315e-20
Meta-analysis	CpG Island Regions	CGI/Shores/Shelves	1.12943	0.199367	1.46959e-08	1.48128	0.121207	2.4001e-34
Meta-analysis	CpG Island Regions	CGI/Shores	1.18361	0.20636	9.71551e-09	1.57345	0.13853	6.75401e-30
Meta-analysis	Regulatory Regions	TFBS	1.19411	0.106747	4.75937e-29	0.948369	0.10142	8.6898e-21
Meta-analysis	Regulatory Regions	Distal Enhancer	1.31575	0.170147	1.0501e-14	0.786283	0.0793668	3.88335e-23
Meta-analysis	Regulatory Regions	Insulator	-0.00909258	0.289529	0.974947	0.180117	0.0841421	0.0323038
Meta-analysis	Regulatory Regions	Promoter	1.97254	0.442068	8.11686e-06	1.87058	0.243988	1.76479e-14
Meta-analysis	Regulatory Regions	Proximal Enhancer	1.67116	0.229364	3.19152e-13	1.42975	0.130649	7.14111e-28
Meta-analysis	Gene Contexts	TSS1500	1.30207	0.272257	1.73146e-06	1.33179	0.154427	6.46106e-18
Meta-analysis	Gene Contexts	TSS200	1.69964	0.519169	0.00106124	1.65707	0.231097	7.47584e-13
Meta-analysis	Gene Contexts	CDS	1.06698	0.452386	0.018346	1.12436	0.0530058	7.39396e-100
Meta-analysis	Gene Contexts	Intron	0.492881	0.0813914	1.39813e-09	0.315245	0.0158848	1.19856e-87
Meta-analysis	Gene Contexts	3' UTR	0.84201	0.121502	4.20844e-12	0.833286	0.0493084	4.54006e-64
Meta-analysis	Gene Contexts	5' UTR	1.31477	0.14307	3.93769e-20	1.25255	0.144773	5.07037e-18
Meta-analysis	Regulatory Regions	DNaseI HS	1.40947	0.209385	1.67937e-11	0.893051	0.112414	1.9532e-15

## Sheet: Supplementary Table 7
Supplementary Table 7. Enrichment of genomic context annotations for CpGs mapped to imQTLs and mQTLs
Tissue	Group	Annotation	imQTL			mQTL
			logOR	SE (logOR)	p-value	logOR	SE (logOR)	p-value
Colon	Chromatin States	TssBiv	-0.537502	0.355538	0.167624	-0.0687755	0.025129	0.00604982
Colon	Chromatin States	BivFlnk	-0.472425	0.303817	0.144148	-0.0886328	0.0223909	6.59412e-05
Colon	Chromatin States	EnhBiv	-0.0709552	0.379898	1	0.34203	0.0283602	3.04592e-31
Colon	Chromatin States	ReprPC	-0.719977	0.303797	0.0127144	0.299065	0.0170256	6.06499e-65
Colon	Chromatin States	ReprPCWk	-0.00171052	0.128011	1	0.362562	0.0100843	8.98094e-266
Colon	Chromatin States	Quies	0.128957	0.0745498	0.0880976	0.0395614	0.00672282	4.19981e-09
Colon	Chromatin States	TssA	-0.935675	0.145019	2.09347e-13	-0.467852	0.0104425	0
Colon	Chromatin States	TssAFlnk	0.188988	0.14641	0.20236	0.23251	0.012987	1.74127e-68
Colon	Chromatin States	TxFlnk	-0.124765	0.708355	1	-0.0703767	0.0611917	0.257529
Colon	Chromatin States	Tx	-0.692909	0.211804	0.000364132	-0.437413	0.0164147	2.42239e-174
Colon	Chromatin States	TxWk	0.119118	0.0995445	0.232641	-0.087837	0.00951118	1.34138e-20
Colon	Chromatin States	EnhG	1.4317	0.221747	1.05869e-07	0.0864632	0.0380888	0.0238198
Colon	Chromatin States	Enh	1.13172	0.111888	1.0964e-18	0.29612	0.0143757	7.82378e-89
Colon	Chromatin States	ZNF/Rpts	NA	NA	NA	-0.146279	0.0766234	0.0593627
Colon	Chromatin States	Het	-0.924721	0.708183	0.256672	0.14254	0.0375696	0.000185052
Colon	CpG Island Regions	CGI	-1.19182	0.145013	2.05297e-22	-0.38104	0.00920942	0
Colon	CpG Island Regions	CGI/Shores/Shelves	-0.577945	0.0786361	4.65089e-14	-0.0470949	0.00653359	5.45944e-13
Colon	CpG Island Regions	CGI/Shores	-0.629149	0.0848897	9.33654e-15	-0.0493117	0.00672992	2.18867e-13
Colon	Regulatory Regions	TFBS	0.550423	0.0991916	5.40093e-09	0.145664	0.00775986	3.70054e-80
Colon	Regulatory Regions	Distal Enhancer	0.757177	0.0776093	1.85359e-20	0.219512	0.00789837	5.67722e-165
Colon	Regulatory Regions	Insulator	0.462664	0.30396	0.124918	0.361256	0.0292065	1.1392e-32
Colon	Regulatory Regions	Promoter	-0.524611	0.135609	4.44068e-05	-0.408956	0.0113153	1.17085103354647e-312
Colon	Regulatory Regions	Proximal Enhancer	0.168768	0.105616	0.115126	0.0494256	0.00986156	6.0385e-07
Colon	Gene Contexts	TSS1500	-0.381724	0.0852122	4.50625e-06	-0.164136	0.0071781	9.93996e-118
Colon	Gene Contexts	TSS200	-0.483134	0.129758	8.57062e-05	-0.329649	0.0107095	9.6889e-223
Colon	Gene Contexts	CDS	-0.738642	0.189397	2.07125e-05	-0.388211	0.0141347	5.28391e-182
Colon	Gene Contexts	Intron	0.0648888	0.0727836	0.383274	-0.0582771	0.0064742	2.27089e-19
Colon	Gene Contexts	3' UTR	0.150428	0.15885	0.349034	-0.066037	0.0155482	1.93894e-05
Colon	Gene Contexts	5' UTR	-0.647837	0.178041	9.43053e-05	-0.356661	0.0136879	1.38102e-162
Colon	Regulatory Regions	DNaseI HS	0.656124	0.0796167	1.35409e-17	0.125443	0.00656036	7.05138e-82
Lung	CpG Island Regions	CGI	-1.54856	0.418424	6.05229e-06	-0.450053	0.00890431	0
Lung	CpG Island Regions	CGI/Shores/Shelves	-0.674985	0.197533	0.000421918	-0.105502	0.00621115	6.11014e-65
Lung	CpG Island Regions	CGI/Shores	-0.67958	0.211908	0.000836584	-0.111869	0.00642315	1.87185e-68
Lung	Regulatory Regions	TFBS	0.487744	0.239252	0.0383292	0.189766	0.00742505	8.02221e-148
Lung	Regulatory Regions	Distal Enhancer	0.587003	0.197541	0.0051538	0.297011	0.00735529	0
Lung	Regulatory Regions	Insulator	NA	NA	NA	0.317478	0.0282269	1.34527e-27
Lung	Regulatory Regions	Promoter	-0.121541	0.283637	0.786593	-0.416313	0.0107231	0
Lung	Regulatory Regions	Proximal Enhancer	-0.0614609	0.283638	1	0.063314	0.00930062	1.29406e-11
Lung	Chromatin States	TssBiv	NA	NA	NA	-0.553382	0.114876	3.05172e-07
Lung	Chromatin States	BivFlnk	NA	NA	NA	-0.482975	0.077015	3.02772e-11
Lung	Chromatin States	EnhBiv	-0.512368	1.00407	1	-0.206485	0.029232	4.68551e-13
Lung	Chromatin States	ReprPC	NA	NA	NA	0.00720289	0.0286259	0.796195
Lung	Chromatin States	ReprPCWk	0.094491	0.389049	0.687129	0.280234	0.0125304	4.09516e-105
Lung	Chromatin States	Quies	-0.115558	0.199221	0.627072	0.111688	0.00654886	1.30269e-64
Lung	Chromatin States	TssA	NA	NA	NA	-0.763228	0.0111731	0
Lung	Chromatin States	TssAFlnk	0.16964	0.508247	0.585176	0.180862	0.0175519	5.07126e-24
Lung	Chromatin States	TxFlnk	NA	NA	NA	0.0973814	0.0755991	0.196775
Lung	Chromatin States	Tx	0.275976	0.293035	0.324509	-0.384345	0.0130014	1.35101e-209
Lung	Chromatin States	TxWk	0.415536	0.207136	0.0472899	0.00775986	0.00798396	0.331159
Lung	Chromatin States	EnhG	1.18908	0.389112	0.0071893	0.161654	0.021738	2.6197e-13
Lung	Chromatin States	Enh	0.699565	0.234901	0.00546214	0.417357	0.00910184	0
Lung	Chromatin States	ZNF/Rpts	-0.251371	1.00409	1	-0.0221165	0.0307015	0.483512
Lung	Chromatin States	Het	-0.297024	0.456464	0.688973	0.193652	0.0127146	1.80915e-50
Lung	Gene Contexts	TSS1500	-0.287511	0.204961	0.177566	-0.172815	0.00680622	9.2507e-145
Lung	Gene Contexts	TSS200	-0.357531	0.303635	0.289467	-0.324594	0.0101074	1.71144e-241
Lung	Gene Contexts	CDS	-0.922389	0.508216	0.0630161	-0.407627	0.0134618	2.86199e-221
Lung	Gene Contexts	Intron	0.209288	0.180578	0.282798	-0.0261945	0.00613248	1.96152e-05
Lung	Gene Contexts	3' UTR	-1.1312	0.712853	0.136421	-0.0824132	0.0148144	2.03856e-08
Lung	Gene Contexts	5' UTR	-0.381569	0.389037	0.409284	-0.369757	0.0130046	2.56116e-193
Lung	Regulatory Regions	DNaseI HS	0.613825	0.194462	0.00153399	0.182527	0.00624022	1.5922e-189
Whole Blood	CpG Island Regions	CGI	-1.94947	0.169428	4.24404e-57	-0.562448	0.00690237	0
Whole Blood	CpG Island Regions	CGI/Shores/Shelves	-1.03449	0.0721777	2.23969e-54	-0.180865	0.00471926	5.92878775009496e-323
Whole Blood	CpG Island Regions	CGI/Shores	-1.24484	0.084529	2.15685e-63	-0.195385	0.00490023	0
Whole Blood	Regulatory Regions	TFBS	0.445903	0.0793021	4.6004e-09	0.172494	0.00559383	2.85684e-212
Whole Blood	Regulatory Regions	Distal Enhancer	1.02657	0.061237	1.0371e-56	0.317358	0.00557265	0
Whole Blood	Regulatory Regions	Insulator	-0.128993	0.334905	0.874553	0.327586	0.0217817	4.04046e-49
Whole Blood	Regulatory Regions	Promoter	-1.64549	0.185095	9.42965e-32	-0.497563	0.00819418	0
Whole Blood	Regulatory Regions	Proximal Enhancer	-0.217733	0.100047	0.0306282	0.0711326	0.00699502	4.18503e-24
Whole Blood	Chromatin States	TssBiv	-1.27564	0.409434	0.00016774	-0.327455	0.0192521	8.55172e-69
Whole Blood	Chromatin States	BivFlnk	-1.41116	0.268996	2.99633e-11	-0.0150204	0.0107716	0.164428
Whole Blood	Chromatin States	EnhBiv	-0.675661	0.147585	5.30165e-07	0.230842	0.00794947	1.15334e-180
Whole Blood	Chromatin States	ReprPC	-1.10447	0.140762	2.03763e-20	0.256956	0.0064527	0
Whole Blood	Chromatin States	ReprPCWk	-0.115416	0.0678446	0.0918466	0.250766	0.00495735	0
Whole Blood	Chromatin States	Quies	0.42108	0.0627824	9.78639e-12	0.282642	0.00475135	0
Whole Blood	Chromatin States	TssA	-1.76206	0.165065	4.37304e-46	-0.788912	0.00782519	0
Whole Blood	Chromatin States	TssAFlnk	0.102126	0.0761719	0.181034	0.0785294	0.00599668	6.84628e-39
Whole Blood	Chromatin States	TxFlnk	-1.27885	0.251857	5.01782e-10	-0.987884	0.0156178	0
Whole Blood	Chromatin States	Tx	0.0585225	0.0863447	0.508145	-0.360571	0.00762199	0
Whole Blood	Chromatin States	TxWk	0.384246	0.0627184	2.00407e-09	-0.0562218	0.00529978	2.16877e-26
Whole Blood	Chromatin States	EnhG	0.849145	0.101797	6.41978e-14	0.147607	0.0108717	3.28726e-41
Whole Blood	Chromatin States	Enh	1.57264	0.0607471	2.84299e-147	0.444337	0.00511241	0
Whole Blood	Chromatin States	ZNF/Rpts	-0.442778	0.448437	0.466531	0.00430718	0.0279341	0.877774
Whole Blood	Chromatin States	Het	-0.56156	0.198516	0.00281681	0.0587435	0.0116128	4.79296e-07
Whole Blood	Gene Contexts	TSS1500	-0.755046	0.0778778	1.9042e-25	-0.201201	0.00513834	0
Whole Blood	Gene Contexts	TSS200	-1.08527	0.138309	2.62552e-20	-0.391679	0.0076925	0
Whole Blood	Gene Contexts	CDS	-0.599327	0.146144	1.09371e-05	-0.333053	0.00973566	4.83398e-271
Whole Blood	Gene Contexts	Intron	0.263938	0.0605907	1.25919e-05	0.0286702	0.00464122	6.5062e-10
Whole Blood	Gene Contexts	3' UTR	-0.0176242	0.140826	1	-0.105978	0.0112462	2.16451e-21
Whole Blood	Gene Contexts	5' UTR	-1.29619	0.198472	8.13497e-16	-0.399269	0.00978472	0
Whole Blood	Regulatory Regions	DNaseI HS	0.529735	0.0640656	2.13692e-17	0.181957	0.00471668	0
Meta-analysis	Chromatin States	TssBiv	-0.878641	0.368008	0.0169608	-0.299979	0.13522	0.0265241
Meta-analysis	Chromatin States	BivFlnk	-0.952418	0.469249	0.0423905	-0.186709	0.140935	0.185241
Meta-analysis	Chromatin States	EnhBiv	-0.497098	0.243806	0.041459	0.122517	0.166991	0.463149
Meta-analysis	Chromatin States	ReprPC	-1.00648	0.167554	1.8914e-09	0.189267	0.0902261	0.0359324
Meta-analysis	Chromatin States	ReprPCWk	-0.0861919	0.0592468	0.145726	0.297584	0.0336075	8.393e-19
Meta-analysis	Chromatin States	Quies	0.185004	0.145599	0.203857	0.144696	0.0721044	0.0447762
Meta-analysis	Chromatin States	TssA	-1.34511	0.413177	0.00113183	-0.673374	0.102998	6.24541e-11
Meta-analysis	Chromatin States	TssAFlnk	0.121481	0.0669842	0.0697439	0.163232	0.0458017	0.000365416
Meta-analysis	Chromatin States	TxFlnk	-0.891712	0.544896	0.101739	-0.323366	0.338536	0.339481
Meta-analysis	Chromatin States	Tx	-0.127611	0.282652	0.651645	-0.392329	0.0223482	5.41489e-69
Meta-analysis	Chromatin States	TxWk	0.292408	0.100681	0.00368059	-0.0453296	0.0279719	0.105115
Meta-analysis	Chromatin States	EnhG	1.10813	0.208893	1.12809e-07	0.146487	0.00947496	6.42049e-54
Meta-analysis	Chromatin States	Enh	1.17348	0.244529	1.59488e-06	0.386716	0.0452651	1.30371e-17
Meta-analysis	Chromatin States	ZNF/Rpts	-0.410948	0.409457	0.315551	-0.0170772	0.0199717	0.392514
Meta-analysis	Chromatin States	Het	-0.544602	0.176313	0.0020094	0.130727	0.0421833	0.0019416
Meta-analysis	CpG Island Regions	CGI	-1.55943	0.262762	2.94303e-09	-0.464655	0.0529093	1.60437e-18
Meta-analysis	CpG Island Regions	CGI/Shores/Shelves	-0.775098	0.154843	5.56608e-07	-0.111258	0.0387441	0.00408396
Meta-analysis	CpG Island Regions	CGI/Shores	-0.866085	0.208729	3.33438e-05	-0.118955	0.0423373	0.00495889
Meta-analysis	Regulatory Regions	TFBS	0.486728	0.0599632	4.77431e-16	0.169444	0.0125891	2.70421e-41
Meta-analysis	Regulatory Regions	Distal Enhancer	0.831321	0.12305	1.4189e-11	0.278135	0.0297692	9.36231e-21
Meta-analysis	Regulatory Regions	Insulator	0.183542	0.295356	0.534319	0.333492	0.0148493	1.05798e-111
Meta-analysis	Regulatory Regions	Promoter	-0.777104	0.452611	0.0859909	-0.441372	0.0285891	9.02257e-54
Meta-analysis	Regulatory Regions	Proximal Enhancer	-0.0326827	0.143058	0.81929	0.0627253	0.00633088	3.84939e-23
Meta-analysis	Gene Contexts	TSS1500	-0.503742	0.147265	0.000624707	-0.179833	0.011367	2.2416e-56
Meta-analysis	Gene Contexts	TSS200	-0.677013	0.230715	0.00334178	-0.349133	0.0218197	1.26123e-57
Meta-analysis	Gene Contexts	CDS	-0.664677	0.112816	3.82288e-09	-0.375429	0.0227689	4.42449e-61
Meta-analysis	Gene Contexts	Intron	0.175758	0.0771764	0.0227652	-0.0184403	0.0254325	0.468411
Meta-analysis	Gene Contexts	3' UTR	0.0309353	0.104245	0.766653	-0.0867274	0.0120506	6.15793e-13
Meta-analysis	Gene Contexts	5' UTR	-0.827539	0.267653	0.00198924	-0.376652	0.013063	8.17113e-183
Meta-analysis	Regulatory Regions	DNaseI HS	0.584583	0.0543487	5.54323e-27	0.163455	0.018859	4.42891e-18
Footenote:
Chromatin states were obtained from tissue-specific annotations catalogued in the NIH Epigenomics Roadmap

## Sheet: Supplementary Table 8
Supplementary Table 8. Enrichment of TFBS for variants mapped to imQTLs and mQTLs
Tissue	Transcription Factor	imQTL			mQTL
		logOR	SE (logOR)	p-value	logOR	SE (logOR)	p-value
Colon	POLR2A	1.73084	0.0907924	1.00537e-56	1.47363	0.0093197	0
Colon	RAD21	1.93201	0.106797	5.64503e-47	1.30896	0.0129301	0
Colon	SP1	1.93156	0.111155	3.89668e-43	1.31647	0.0134957	0
Colon	EP300	1.70532	0.109127	4.18044e-37	1.23418	0.0124001	0
Colon	CTCF	1.37867	0.0937187	9.86986e-37	1.18064	0.00939353	0
Colon	YY1	1.80919	0.119487	1.19394e-33	1.43526	0.0132222	0
Colon	REST	1.82828	0.122323	1.37911e-32	1.41067	0.0138114	0
Colon	RXRA	1.99247	0.130609	2.08665e-32	1.2516	0.0170782	0
Colon	BHLHE40	2.03465	0.134515	1.72375e-31	1.52688	0.0159947	0
Colon	FOXA1	1.80265	0.127912	3.70479e-29	0.901459	0.0178165	0
Colon	MYC	1.86711	0.134504	8.8265e-28	1.58115	0.0145067	0
Colon	HNF4A	1.89941	0.13771	3.46112e-27	1.10012	0.0185236	0
Colon	JUND	1.61875	0.12306	8.16e-27	1.18456	0.0139134	0
Colon	POLR2G	1.80766	0.136608	1.08577e-25	1.73941	0.0134836	0
Colon	MAX	1.73023	0.134497	7.77612e-25	1.55571	0.0137982	0
Colon	TAF1	1.93769	0.150606	1.75615e-23	1.72628	0.0158764	0
Colon	HDAC2	1.74565	0.142405	1.66878e-22	1.48204	0.0151927	0
Colon	SMC3	1.86113	0.150601	3.67635e-22	1.45113	0.0171994	0
Colon	IKZF1	1.46985	0.12621	4.81109e-22	1.26458	0.0129693	0
Colon	MNT	1.63842	0.138823	1.53494e-21	1.36687	0.0147914	0
Colon	SIN3A	1.69764	0.143665	3.07075e-21	1.69161	0.0137853	0
Colon	FOS	1.50118	0.132486	1.05284e-20	0.882907	0.0162574	0
Colon	CREM	1.83429	0.155327	1.88274e-20	1.50234	0.0171678	0
Colon	FOSL2	2.12945	0.175524	5.38624e-20	1.34953	0.0239753	0
Colon	RBFOX2	1.61655	0.146302	4.2954e-19	1.66136	0.0137153	0
Colon	HNRNPL	2.22925	0.186367	5.17898e-19	1.79676	0.0220078	0
Colon	RNF2	1.69454	0.155318	2.99007e-18	1.51684	0.016006	0
Colon	DPF2	1.53462	0.144957	5.2614e-18	1.28074	0.0153112	0
Colon	ELF1	1.82966	0.166455	7.16418e-18	1.59223	0.0177132	0
Colon	TFAP4	2.34183	0.199669	7.43164e-18	1.6332	0.0267879	0
Colon	RBM39	1.9389	0.175505	1.48575e-17	1.82706	0.0178246	0
Colon	SKI	2.11427	0.189411	3.71812e-17	1.58961	0.0231723	0
Colon	ASH2L	1.63912	0.157003	4.78123e-17	1.64484	0.0149711	0
Colon	FOXA2	1.60684	0.157001	1.44874e-16	0.846061	0.0208399	2.7839e-285
Colon	HNRNPLL	2.04935	0.189404	1.93075e-16	1.94331	0.0193229	0
Colon	GABPA	1.81489	0.173087	2.01356e-16	1.60268	0.0182306	0
Colon	PHF8	1.94368	0.183429	3.19295e-16	1.86526	0.0183896	0
Colon	CTBP1	1.62705	0.160565	3.57116e-16	1.42957	0.0166604	0
Colon	L3MBTL2	1.64111	0.162449	5.059e-16	1.53855	0.016207	0
Colon	EGR1	1.69813	0.168565	1.05023e-15	1.59892	0.0168401	0
Colon	NR2F2	1.71499	0.170775	1.51286e-15	1.32983	0.0193051	0
Colon	TBP	1.74368	0.173082	1.59196e-15	1.63446	0.0174032	0
Colon	AGO2	1.84266	0.180653	1.70113e-15	1.68118	0.0186604	0
Colon	NR2F6	1.84939	0.183421	3.82432e-15	1.21977	0.0232703	0
Colon	XRCC5	1.92164	0.189391	4.71269e-15	1.76984	0.0195683	0
Colon	KDM1A	1.37421	0.147674	8.66669e-15	1.21038	0.0149604	0
Colon	TCF7	2.14438	0.211837	3.1567e-14	1.23679	0.0309368	5.13965e-251
Colon	HNF4G	2.06967	0.207506	4.3503e-14	1.22807	0.0293152	4.18121e-276
Colon	MLLT1	1.62555	0.173074	4.59141e-14	1.32132	0.0188407	0
Colon	TCF12	1.50192	0.164399	8.27378e-14	1.37386	0.0165035	0
Colon	GMEB1	2.03294	0.207501	9.39089e-14	1.65998	0.0237399	0
Colon	JUN	2.14193	0.216453	1.16573e-13	1.54498	0.0274877	0
Colon	ZFX	1.68249	0.180641	1.18409e-13	1.54052	0.0183859	0
Colon	RCOR1	1.71601	0.18341	1.1907e-13	1.39583	0.0201964	0
Colon	MXI1	1.61247	0.175481	1.46736e-13	1.63173	0.0166333	0
Colon	NBN	1.6608	0.180639	2.08032e-13	1.4103	0.0192523	0
Colon	NRF1	1.61841	0.177999	2.78156e-13	1.683	0.0165614	0
Colon	ZNF143	1.61643	0.180636	6.53105e-13	1.5793	0.0175388	0
Colon	ETS1	1.98014	0.211816	8.59263e-13	1.78184	0.0224252	0
Colon	IKZF2	1.52937	0.175475	1.37317e-12	1.22276	0.0190755	0
Colon	KDM4A	1.87342	0.207484	2.52772e-12	1.96101	0.019363	0
Colon	HDAC1	1.42934	0.168549	2.66517e-12	1.49137	0.0155847	0
Colon	TBX3	2.34513	0.245454	2.90737e-12	1.43102	0.0363648	3.72472e-233
Colon	ZNF687	1.71808	0.195998	3.92882e-12	1.54978	0.0202298	0
Colon	ATF3	1.3817	0.166428	5.42979e-12	1.09832	0.0178119	0
Colon	ZNF592	1.66231	0.192591	5.78219e-12	1.36295	0.0210022	0
Colon	GATAD2B	1.65741	0.192591	6.46309e-12	1.52142	0.0195521	0
Colon	E2F6	2.08113	0.232442	1.41921e-11	1.91346	0.0244453	0
Colon	SKIL	1.65774	0.195993	1.48733e-11	1.46927	0.0203619	0
Colon	FOXK2	1.76391	0.207473	2.30124e-11	1.40525	0.0233449	0
Colon	CREB3L1	2.03529	0.232436	3.04372e-11	1.77079	0.0254243	0
Colon	NCOR1	1.55141	0.189361	3.26981e-11	1.27719	0.0203439	0
Colon	NFIC	1.39697	0.175468	4.3622e-11	1.15712	0.0184561	0
Colon	USF1	1.84072	0.221362	9.83242e-11	1.42817	0.0256172	0
Colon	EZH2	1.4722	0.186299	9.83827e-11	1.6444	0.0164725	0
Colon	UBTF	2.09894	0.245412	1.2314e-10	1.87836	0.0264432	0
Colon	MGA	1.7228	0.21179	1.2817e-10	1.46811	0.0227339	0
Colon	ETV4	2.093	0.245411	1.34603e-10	1.6374	0.0292953	0
Colon	GATA3	1.33577	0.175465	2.05712e-10	0.830847	0.0207478	9.22466e-279
Colon	ZBTB7A	1.84195	0.226678	2.62533e-10	1.89677	0.0214124	0
Colon	MEIS2	1.66617	0.211785	3.73045e-10	1.22492	0.0246651	0
Colon	MTA3	1.56152	0.203402	5.55235e-10	1.55133	0.019497	0
Colon	NR3C1	1.74204	0.221352	5.57901e-10	1.4447	0.0242484	0
Colon	USF2	1.9801	0.245395	7.20982e-10	1.62728	0.0278551	0
Colon	ZNF24	1.46615	0.19598	8.98496e-10	1.31357	0.0199155	0
Colon	IRF1	1.95561	0.245391	1.03384e-09	1.73815	0.0262175	0
Colon	GATA4	2.31109	0.27994	1.47081e-09	1.66685	0.0367805	5.97168e-295
Colon	PRDM10	1.8593	0.238624	1.50977e-09	1.39416	0.0283367	0
Colon	ESRRA	1.59269	0.216394	3.24826e-09	1.51207	0.0214207	0
Colon	ATF7	1.12661	0.164382	3.5193e-09	1.09592	0.0156657	0
Colon	ZBTB33	1.17343	0.170746	4.15242e-09	1.15417	0.0162153	0
Colon	RUNX3	1.48079	0.207451	5.5027e-09	1.35202	0.0208849	0
Colon	TRIM22	1.40859	0.199575	5.66426e-09	1.42207	0.0188299	0
Colon	ZNF263	1.54563	0.216391	7.41785e-09	1.4864	0.0211839	0
Colon	TAF15	1.88312	0.252767	8.49899e-09	1.96513	0.0236619	0
Colon	CBX3	1.79622	0.245372	1.04263e-08	1.43843	0.0277155	0
Colon	RBBP5	1.78137	0.24537	1.2889e-08	1.86578	0.0228191	0
Colon	MTA2	1.36518	0.199573	1.3283e-08	1.12058	0.0210722	0
Colon	BATF	1.99471	0.269878	1.80734e-08	1.05622	0.0401113	1.76913e-114
Colon	RELB	1.49297	0.216387	1.84732e-08	1.29881	0.0224457	0
Colon	RFX5	1.82272	0.252759	1.93335e-08	1.59909	0.0269294	0
Colon	BACH1	1.74848	0.245367	2.0574e-08	1.62435	0.0249352	0
Colon	STAT3	1.47634	0.216386	2.45759e-08	1.078	0.0246	3.90146889116416e-313
Colon	MAFF	1.51853	0.221333	2.4945e-08	0.724185	0.0302709	4.493e-103
Colon	EP400	1.5632	0.226652	2.58297e-08	1.49955	0.0222524	0
Colon	PKNOX1	1.12912	0.175456	3.00921e-08	1.08466	0.0168293	0
Colon	SMARCA4	1.2129	0.186286	3.13771e-08	1.18008	0.0178225	0
Colon	ETV6	1.71339	0.252747	8.36583e-08	1.25342	0.0298348	4.42825e-276
Colon	SOX6	1.56642	0.238594	1.17669e-07	1.37237	0.0248345	0
Colon	MBD2	1.83006	0.269855	1.31334e-07	1.68736	0.027767	0
Colon	MAFK	1.10501	0.183376	1.90658e-07	0.637502	0.021262	5.37624e-165
Colon	CBFA2T3	1.42876	0.226641	2.12633e-07	0.991183	0.0262278	6.34085e-238
Colon	HNF1A	2.09317	0.30388	2.23527e-07	1.24513	0.0435236	5.10336e-129
Colon	DACH1	1.96688	0.291113	2.43128e-07	1.24446	0.0391622	8.21266e-159
Colon	GABPB1	1.56297	0.245348	2.71015e-07	1.65941	0.0224654	0
Colon	RB1	1.61765	0.252737	2.93926e-07	1.83033	0.0220676	0
Colon	GATA2	1.29227	0.211759	2.9785e-07	0.969872	0.023143	3.55289e-294
Colon	CEBPB	1.17218	0.195964	3.11724e-07	0.842964	0.0213953	6.17907e-269
Colon	MITF	1.51898	0.245345	4.91485e-07	1.08585	0.0284385	2.34721e-237
Colon	AGO1	1.64218	0.260855	5.00838e-07	1.9115	0.0222595	0
Colon	ZNF217	1.33069	0.22132	5.14892e-07	1.38375	0.0204731	0
Colon	HCFC1	1.79654	0.279852	5.23005e-07	1.85822	0.026304	0
Colon	FOXP1	2.48042	0.355737	5.81423e-07	0.85909	0.0742337	1.41018e-24
Colon	CHD4	1.70077	0.269839	5.99537e-07	1.26219	0.0315626	1.0134e-249
Colon	SMARCE1	1.39623	0.232372	6.72208e-07	1.27532	0.0232748	0
Colon	ARID3A	1.43266	0.238583	7.81884e-07	1.26247	0.0244647	0
Colon	SPI1	1.30315	0.221318	7.90781e-07	1.06877	0.0232607	0
Colon	PAX5	1.84941	0.291095	8.19424e-07	1.63628	0.0309449	0
Colon	ARNT	1.37804	0.232371	8.74432e-07	1.34014	0.0224147	0
Colon	SMARCA5	1.41125	0.238582	1.05202e-06	1.40452	0.0227243	0
Colon	TBL1XR1	1.5121	0.252727	1.13834e-06	1.53084	0.0238924	0
Colon	BCL11A	2.01834	0.318488	1.51102e-06	1.30701	0.0427537	4.36421e-145
Colon	ZNF318	2.15667	0.335525	1.64679e-06	1.29242	0.0485883	1.26745e-110
Colon	ZNF639	1.75539	0.291082	2.1305e-06	1.66174	0.0292265	0
Colon	NFIB	1.57274	0.269825	2.59466e-06	1.13415	0.0314455	1.90269e-209
Colon	BCL3	1.56569	0.269825	2.80926e-06	1.41595	0.0275602	0
Colon	MEF2B	1.33772	0.238577	2.87268e-06	1.24336	0.0235762	0
Colon	NFE2L2	1.8237	0.303835	2.94095e-06	1.2883	0.0373557	5.78445e-185
Colon	AFF1	1.63291	0.279833	3.06839e-06	1.38037	0.0300189	1.76875501211166e-321
Colon	E2F8	1.81235	0.303833	3.27024e-06	1.6547	0.0314709	0
Colon	ZKSCAN1	1.80166	0.303832	3.61369e-06	1.50712	0.0334456	1.06231e-300
Colon	RAD51	1.41684	0.252719	3.74556e-06	1.22397	0.026183	0
Colon	TRIM28	1.16086	0.216366	4.19506e-06	1.08615	0.0210787	0
Colon	GATA1	1.3555	0.245332	4.22642e-06	1.18069	0.0251595	0
Colon	ZNF316	1.06966	0.203373	4.72437e-06	0.590978	0.0237615	1.98363e-115
Colon	ESR1	1.6732	0.291072	4.84555e-06	1.14777	0.0354452	1.5035e-168
Colon	FOXM1	1.763	0.303826	5.17663e-06	1.39026	0.034604	4.58669e-245
Colon	E4F1	1.44039	0.260837	5.60751e-06	1.51813	0.0239595	0
Colon	ZSCAN29	1.6422	0.291068	6.58303e-06	1.54231	0.0291685	0
Colon	HES1	1.96977	0.335487	7.29435e-06	1.29983	0.0441449	6.22843e-135
Colon	ARID1B	1.26145	0.238572	7.94304e-06	1.06567	0.0246331	4.05479e-306
Colon	NFATC3	1.33432	0.252713	1.02385e-05	1.21548	0.0252573	0
Colon	POU2F2	1.79404	0.318451	1.04937e-05	1.56045	0.034108	1.11819e-306
Colon	SMAD1	1.78863	0.31845	1.09869e-05	1.54646	0.0342325	7.43097e-300
Colon	IRF4	1.78032	0.318449	1.17877e-05	1.38878	0.0366205	1.48085e-218
Colon	MYNN	1.90584	0.335475	1.20331e-05	1.64562	0.0365472	2.57296e-292
Colon	ZEB2	1.36757	0.260831	1.2995e-05	1.32118	0.0252588	0
Colon	ZBTB40	1.24383	0.245324	1.72865e-05	1.32497	0.0223487	0
Colon	E2F1	1.45645	0.279815	1.92901e-05	1.5138	0.0259517	0
Colon	ZHX2	1.71899	0.31844	1.97551e-05	1.73695	0.030395	0
Colon	NR2F1	1.32937	0.260828	2.00503e-05	1.26188	0.0254699	0
Colon	CUX1	1.52713	0.291056	2.01632e-05	1.00289	0.0352915	8.99766e-135
Colon	TCF7L2	1.59022	0.303805	2.49879e-05	1.45046	0.030941	0
Colon	PCBP1	1.58712	0.303804	2.56914e-05	1.93096	0.0250125	0
Colon	NFATC1	1.67947	0.318435	2.74685e-05	1.23677	0.0373681	1.922e-172
Colon	KDM5B	1.57306	0.303803	2.91269e-05	1.84508	0.0257746	0
Colon	NFE2	1.66579	0.318433	3.07686e-05	1.16509	0.0383698	8.43546e-148
Colon	CBX2	2.66271	0.44918	3.29713e-05	1.28514	0.0841963	9.84591e-38
Colon	NFYB	1.89612	0.35559	3.87157e-05	1.50978	0.0410061	4.92567e-201
Colon	KDM4B	2.02966	0.379922	5.12775e-05	1.90609	0.0392249	0
Colon	SMAD5	1.42179	0.291045	5.46802e-05	1.69491	0.0245078	0
Colon	TAF9B	1.69339	0.335442	6.12419e-05	1.46786	0.0356699	6.24067e-253
Colon	ZNF444	1.40566	0.291044	6.35482e-05	1.57013	0.0256878	0
Colon	BCOR	1.22351	0.26082	6.48304e-05	1.17352	0.0251907	0
Colon	PML	1.53418	0.318417	9.01734e-05	1.58097	0.0297639	0
Colon	BRD9	1.6334	0.335433	9.58718e-05	1.49467	0.0342171	2.5406e-283
Colon	PHF20	1.71027	0.355559	0.000137763	1.78648	0.0330684	0
Colon	EED	1.25244	0.279798	0.000145168	1.37888	0.0249787	0
Colon	CREB1	0.915052	0.216355	0.000149014	0.988723	0.0196059	0
Colon	SAP30	1.5688	0.335425	0.000154386	1.84323	0.0284071	0
Colon	STAT1	1.81137	0.379877	0.000194282	1.81357	0.0366878	0
Colon	ZBTB11	2.00864	0.410089	0.000195361	1.81509	0.0436263	1.77907e-242
Colon	CBFA2T2	1.35353	0.30378	0.000195569	1.05899	0.0329738	2.25005e-169
Colon	MTA1	1.43154	0.318406	0.000203919	1.55048	0.0287011	0
Colon	FOSL1	2.25096	0.449009	0.000222418	1.62314	0.058717	1.17558e-111
Colon	TEAD4	1.33384	0.303779	0.000230709	1.31363	0.0290522	1.99945516113176e-315
Colon	MEF2A	1.63249	0.355547	0.000231469	1.29603	0.0397072	1.48794e-165
Colon	DNMT1	2.62285	0.50185	0.000239009	1.48291	0.0842301	1.25455e-47
Colon	ZNF579	1.61557	0.355545	0.000258852	1.54498	0.0351529	6.06214e-284
Colon	U2AF1	1.74803	0.379866	0.000283619	1.88673	0.0344424	0
Colon	TBX21	1.1733	0.279792	0.000306477	1.07328	0.0276188	1.36177e-246
Colon	GATAD2A	1.7279	0.379862	0.000319576	1.5307	0.0399556	1.23173e-216
Colon	C11orf30	1.02889	0.252694	0.000331267	0.84181	0.0258648	9.5541e-184
Colon	NR2C1	1.57621	0.35554	0.000335252	1.4627	0.0357873	8.68471e-250
Colon	NFRKB	1.27916	0.303774	0.000363167	1.37172	0.0275558	0
Colon	TAL1	1.27491	0.303773	0.000376062	1.07865	0.0314422	3.82109e-192
Colon	LCORL	1.88426	0.410061	0.000376181	1.11892	0.0563851	7.31402e-65
Colon	NCOA1	1.27295	0.303773	0.000382167	1.53361	0.0255534	0
Colon	EBF1	1.27089	0.303773	0.000388683	1.17538	0.0300119	2.21567e-244
Colon	FUS	1.87696	0.410059	0.000390783	2.03703	0.0371131	0
Colon	RUNX1	2.09084	0.448959	0.000458906	1.80851	0.0499051	1.54192e-184
Colon	ZBTB2	1.52593	0.355533	0.000465017	1.63791	0.0322696	0
Colon	SMARCC2	1.41276	0.335407	0.000474178	1.19543	0.0352074	3.95467e-183
Colon	EHMT2	1.22882	0.30377	0.00054756	1.02314	0.0315429	2.90436e-174
Colon	RBM22	1.10873	0.279788	0.000554719	1.3269	0.0238595	0
Colon	PTBP1	1.80614	0.410045	0.000564348	1.79905	0.039758	2.41794e-287
Colon	ZMYM3	1.10425	0.279787	0.000577655	0.917506	0.0287006	7.7049e-174
Colon	ATF2	0.785702	0.207417	0.000654919	0.667877	0.0204397	3.89008e-194
Colon	SOX13	1.77237	0.410038	0.000671506	1.38377	0.0471645	1.34729e-131
Colon	CBFB	1.3618	0.335401	0.000677458	1.49642	0.0299379	0
Colon	JUNB	1.19906	0.303767	0.000695683	0.951891	0.0321348	5.17331e-148
Colon	SREBF1	1.59281	0.379841	0.000703928	1.31938	0.0411698	7.59233e-159
Colon	FIP1L1	1.58314	0.37984	0.000744256	1.98974	0.0303901	0
Colon	ZFP91	1.5827	0.37984	0.000746153	1.49272	0.0378436	2.579e-231
Colon	ZNF384	1.11482	0.291021	0.000840604	1.09544	0.0276444	5.39576e-255
Colon	CHD1	1.24507	0.318388	0.000847552	1.5933	0.0257272	0
Colon	RFX1	1.0443	0.279784	0.000987054	1.22509	0.024216	0
Colon	HNRNPK	1.21447	0.318386	0.00106244	1.40012	0.0276302	0
Colon	SIN3B	1.67412	0.410021	0.0011073	1.92515	0.0352547	0
Colon	IRF2	1.89131	0.448908	0.00111135	1.68426	0.0477879	2.16907e-178
Colon	NEUROD1	1.46007	0.379823	0.00149727	1.6269	0.0335425	0
Colon	SUZ12	1.14456	0.31838	0.00176418	1.75854	0.0228091	0
Colon	CBX1	1.42404	0.379819	0.00183038	1.70542	0.0318253	0
Colon	ELF4	1.25693	0.355503	0.00250031	1.53436	0.0296376	0
Colon	KLF5	1.48936	0.409992	0.0027668	1.71248	0.0353507	0
Colon	STAT5A	1.22563	0.3555	0.00301582	1.34423	0.0318058	8.59737e-274
Colon	ZBTB7B	1.64074	0.448856	0.00325919	1.41908	0.0476154	9.65057e-135
Colon	HMBOX1	1.11338	0.335379	0.00356769	0.991787	0.0334123	2.61809e-147
Colon	ZNF282	1.42691	0.409983	0.00374003	1.69865	0.0344947	0
Colon	ZNF207	1.27682	0.379802	0.00407889	1.65956	0.0302255	0
Colon	KLF16	1.36219	0.409975	0.00508669	1.48672	0.0367517	1.59072e-243
Colon	BRD4	1.35106	0.409973	0.00536012	1.66198	0.033782	0
Colon	HDAC3	1.50617	0.448833	0.005698	1.17582	0.0498553	1.1705e-89
Colon	ZBED1	1.20761	0.379794	0.00587577	1.31848	0.0340766	6.38281e-231
Colon	PYGO2	2.10996	0.578857	0.00617379	1.3936	0.0785063	2.93546e-49
Colon	PRPF4	1.48626	0.44883	0.00618082	1.87588	0.0359448	0
Colon	LEF1	1.0854	0.355487	0.00681547	1.37966	0.0292285	0
Colon	WRNIP1	1.67575	0.501516	0.00732826	1.56751	0.0505979	3.14549e-141
Colon	SRF	1.1552	0.379789	0.00770464	1.38863	0.0321672	6.80079e-283
Colon	MEF2C	1.62899	0.501506	0.00859036	1.40391	0.0532791	4.66359e-106
Colon	KDM5A	1.13094	0.379787	0.00872013	1.72844	0.0273137	0
Colon	TAF7	1.38715	0.448815	0.00921738	1.78365	0.0356516	0
Colon	CC2D1A	1.03102	0.355483	0.00924357	1.34264	0.0289466	0
Colon	THAP1	1.93187	0.578795	0.00999276	2.02691	0.0540566	4.48288e-191
Colon	CHAMP1	1.1397	0.409949	0.014047	0.946153	0.0422954	2.72741e-85
Colon	SREBF2	1.74906	0.578742	0.0162137	1.88419	0.052549	1.56674e-178
Colon	RLF	1.34759	0.501457	0.021703	1.73284	0.0399367	2.69208e-267
Colon	TRIM24	0.796485	0.335357	0.0236633	1.17066	0.0263659	2.51700495560441e-314
Colon	RBM15	3.57808	1.0035	0.0277308	1.79219	0.236062	1.11514e-09
Colon	ZNF507	2.01046	0.708447	0.0302097	1.40312	0.091097	1.82671e-37
Colon	ZEB1	1.50136	0.578684	0.030616	1.81807	0.0478571	2.57316e-202
Colon	NANOG	1.22383	0.501439	0.0320305	1.12027	0.04972	4.78076e-83
Colon	HDAC6	1.46299	0.578677	0.0337037	1.80602	0.047208	1.48873e-205
Colon	STAT2	1.94645	0.708421	0.0339366	1.66508	0.0782626	2.10683e-66
Colon	MYB	1.91349	0.708408	0.0360218	1.6096	0.0789506	9.72387e-62
Colon	NUFIP1	1.90488	0.708405	0.036586	1.42063	0.085729	6.28629e-43
Colon	ZNF184	1.0042	0.44877	0.0391431	1.25331	0.0375326	7.40724e-175
Colon	PHF21A	1.37597	0.57866	0.0417965	1.62259	0.0490877	6.90187e-159
Colon	CCAR2	1.82509	0.708376	0.042225	1.7539	0.0707827	4.85786e-88
Colon	ELK1	1.13267	0.501427	0.0423109	1.8894	0.0335394	0
Lung	POLR2A	1.87702	0.203357	2.11356e-14	1.48523	0.00879552	0
Lung	EP300	1.66842	0.258644	1.20918e-07	1.2892	0.0114916	0
Lung	SPI1	2.30487	0.328118	1.53034e-07	1.13145	0.021397	0
Lung	TCF12	1.86206	0.328103	7.49142e-06	1.38455	0.0155711	0
Lung	MAX	1.73431	0.314031	8.93275e-06	1.56913	0.0130198	0
Lung	RUNX3	2.10767	0.364071	1.03493e-05	1.39753	0.0193983	0
Lung	YY1	1.61824	0.301823	1.14355e-05	1.42602	0.0125732	0
Lung	MYC	1.76696	0.3281	1.67089e-05	1.59469	0.0136813	0
Lung	FOS	1.56177	0.301822	1.96619e-05	0.941103	0.0149926	0
Lung	ELF1	1.97992	0.364066	2.54204e-05	1.62172	0.0166054	0
Lung	BHLHE40	1.82095	0.344537	2.82455e-05	1.5566	0.0149761	0
Lung	REST	1.60028	0.314029	2.97754e-05	1.40808	0.0130944	0
Lung	PAX5	2.69546	0.455452	3.04392e-05	1.64466	0.0292827	0
Lung	ETS1	2.34902	0.417281	3.42625e-05	1.76568	0.0214412	0
Lung	NFIC	1.7871	0.344536	3.65327e-05	1.20012	0.017148	0
Lung	RAD21	1.44851	0.30182	5.69599e-05	1.30266	0.0122739	0
Lung	CREM	1.82872	0.364061	7.20895e-05	1.50672	0.0162499	0
Lung	HDAC2	1.66646	0.344534	9.02008e-05	1.48739	0.0143704	0
Lung	SMC3	1.78338	0.36406	9.80479e-05	1.41385	0.0165506	0
Lung	ATF3	1.65394	0.344533	9.89488e-05	1.11571	0.0167225	0
Lung	SIN3A	1.63997	0.344533	0.000109687	1.68137	0.0131365	0
Lung	TBX21	2.12645	0.417269	0.000114744	1.13853	0.0253943	4.94065645841247e-324
Lung	GABPA	1.90674	0.387746	0.000123593	1.61305	0.0171987	0
Lung	JUND	1.40662	0.314025	0.000158553	1.19535	0.0131146	0
Lung	CTCF	1.03224	0.246642	0.000160077	1.16553	0.00893074	0
Lung	MEIS2	2.03432	0.417265	0.000187618	1.27624	0.0228292	0
Lung	CEBPB	1.67559	0.364057	0.000201649	0.918551	0.0195475	0
Lung	SMAD5	2.26689	0.45542	0.000222101	1.68631	0.0233576	0
Lung	PKNOX1	1.52056	0.34453	0.000261092	1.12595	0.0156567	0
Lung	MNT	1.4988	0.34453	0.000304988	1.37804	0.0139437	0
Lung	IKZF1	1.32105	0.314024	0.000322608	1.30543	0.0120899	0
Lung	GATA3	1.60079	0.364055	0.000329613	0.854588	0.0194185	0
Lung	MXI1	1.73674	0.387741	0.000341287	1.63405	0.0157614	0
Lung	TAF1	1.72049	0.38774	0.000375523	1.72105	0.0150973	0
Lung	MLLT1	1.71911	0.38774	0.000378563	1.33522	0.01774	0
Lung	AGO2	1.87025	0.417259	0.000443813	1.63973	0.0180294	0
Lung	BATF	2.45102	0.507328	0.000477029	1.20033	0.0355236	1.02526e-181
Lung	POLR2G	1.50731	0.364053	0.000602216	1.68542	0.0130736	0
Lung	IRF5	4.02647	0.712741	0.000636044	1.58506	0.0925616	1.52788e-44
Lung	ETV4	2.35383	0.507321	0.000683697	1.63929	0.0278032	0
Lung	ATF7	1.37158	0.344528	0.000743346	1.11153	0.0147212	0
Lung	ZNF384	1.95718	0.455404	0.000889815	1.11126	0.0259672	7.51183e-297
Lung	SIX5	2.74603	0.583719	0.00107241	1.73951	0.037261	6.47391935529787e-311
Lung	GATA2	1.65908	0.417252	0.00130207	1.00921	0.0215015	0
Lung	ZBTB33	1.37942	0.364051	0.00134337	1.16836	0.0152646	0
Lung	MYB	3.62654	0.712555	0.0013975	1.61425	0.0748377	3.15428e-69
Lung	FOXA2	1.48314	0.387734	0.0014633	0.854325	0.0196368	0
Lung	JUN	2.13588	0.507306	0.00151598	1.56205	0.0258722	0
Lung	NR2F2	1.61727	0.41725	0.00160355	1.37132	0.0179604	0
Lung	FOXA1	1.3427	0.36405	0.0016826	0.963767	0.0163961	0
Lung	EGR1	1.57134	0.417249	0.00201164	1.58417	0.0160627	0
Lung	ARNT	1.75354	0.455396	0.00215137	1.37862	0.020886	0
Lung	CBFA2T3	1.7518	0.455396	0.00216742	1.06538	0.0240069	8.39911597930119e-323
Lung	SREBF1	2.45358	0.583687	0.00245275	1.2789	0.0396771	1.14042e-162
Lung	TAL1	1.97707	0.507298	0.00267837	1.12771	0.0291124	2.10856e-242
Lung	GATAD2B	1.63466	0.455392	0.00355463	1.56881	0.018184	0
Lung	SKI	1.8237	0.50729	0.00459236	1.57502	0.02213	0
Lung	CTBP1	1.39176	0.417245	0.00477522	1.43246	0.0157615	0
Lung	EED	1.78496	0.507289	0.005253	1.43534	0.0230928	0
Lung	SP1	1.11874	0.364046	0.00628418	1.34422	0.0126379	0
Lung	NCOR1	1.48951	0.455388	0.00646225	1.28687	0.0191836	0
Lung	TBP	1.48751	0.455388	0.00651489	1.67322	0.016253	0
Lung	PBX3	2.80431	0.712343	0.00690583	1.7213	0.0474076	3.18994e-189
Lung	FOXP1	2.79179	0.712341	0.00707362	0.920874	0.0680475	1.11599e-32
Lung	NRF1	1.42245	0.455386	0.00846439	1.67149	0.0157853	0
Lung	RBM22	1.64162	0.507283	0.008576	1.33289	0.0225561	0
Lung	IRF2	2.68563	0.712324	0.0086658	1.7656	0.0438362	8.62551e-231
Lung	TCF7L2	1.99485	0.583652	0.00866705	1.44124	0.0294226	0
Lung	ESR1	1.99127	0.583652	0.00875098	1.24577	0.0320865	4.65508e-237
Lung	CBFB	1.97197	0.583651	0.00921688	1.53336	0.0279256	0
Lung	ESRRA	1.58499	0.507281	0.010374	1.51638	0.0202556	0
Lung	ZNF263	1.53758	0.50728	0.0121472	1.45538	0.0203361	0
Lung	ZNF687	1.50079	0.507278	0.0137158	1.59148	0.018846	0
Lung	RELB	1.48825	0.507278	0.0142923	1.35023	0.0208003	0
Lung	NR2F6	1.48787	0.507278	0.0143102	1.22934	0.0219417	0
Lung	STAT3	1.46864	0.507277	0.0152397	1.17955	0.0222302	0
Lung	CBFA2T2	1.76034	0.58364	0.0161513	1.12394	0.0302991	1.40686e-222
Lung	TEAD4	1.7377	0.583639	0.0171343	1.35513	0.0269794	0
Lung	BCL3	1.72805	0.583638	0.0175702	1.42764	0.0259962	0
Lung	ZBTB8A	4.01863	1.00437	0.0179703	1.22356	0.15441	1.43899e-11
Lung	EBF1	1.68016	0.583636	0.0198925	1.22939	0.027767	0
Lung	ZNF217	1.37112	0.507275	0.0208845	1.38619	0.0193678	0
Lung	RCOR1	1.35625	0.507274	0.0218986	1.40175	0.0191025	0
Lung	ZBTB7A	1.63976	0.583634	0.0220724	1.86236	0.0206421	0
Lung	HES1	2.16796	0.712264	0.0229324	1.37777	0.0403799	2.49497e-178
Lung	JUNB	1.60612	0.583633	0.0240566	1.04212	0.0291767	1.69683e-210
Lung	CREB1	1.13934	0.45538	0.0251354	0.962763	0.0187708	0
Lung	USF1	1.58812	0.583632	0.025186	1.43254	0.024241	0
Lung	BCL11A	2.11018	0.712259	0.0255088	1.37276	0.039334	1.08451e-186
Lung	HNF4A	1.12303	0.45538	0.0266874	1.10378	0.0175015	0
Lung	ZFX	1.28759	0.507272	0.0271979	1.50111	0.0177217	0
Lung	HDAC1	1.11243	0.455379	0.0277424	1.49027	0.0147708	0
Lung	TBL1XR1	1.53845	0.58363	0.0285624	1.57173	0.0222651	0
Lung	NBN	1.26778	0.507272	0.0289319	1.41631	0.0182084	0
Lung	FIP1L1	2.03425	0.712253	0.0293156	1.94376	0.0294533	0
Lung	RXRA	1.09148	0.455379	0.0299386	1.25669	0.0161415	0
Lung	NR3C1	1.48958	0.583629	0.0322907	1.47486	0.0226897	0
Lung	ZNF143	1.2218	0.507271	0.0333523	1.54918	0.0168404	0
Lung	SOX6	1.47046	0.583628	0.0338674	1.40346	0.0232015	0
Lung	MEF2A	1.95161	0.712247	0.0340699	1.34531	0.0368331	1.6994e-205
Lung	NEUROD1	1.91061	0.712244	0.0366906	1.61269	0.0320116	0
Lung	MTA2	1.18758	0.50727	0.0370317	1.19184	0.0193387	0
Lung	TBX3	1.8958	0.712243	0.037683	1.42116	0.0346232	3.73132e-255
Lung	NR2F1	1.42067	0.583626	0.0383131	1.27425	0.0239939	0
Lung	POU2F2	1.88624	0.712243	0.0383372	1.5846	0.0320279	0
Lung	TRIM28	1.15446	0.507269	0.0409363	1.08548	0.0199584	0
Lung	FOSL2	1.3781	0.583625	0.0425327	1.40685	0.0221614	0
Lung	MGA	1.37558	0.583625	0.0427947	1.48159	0.0214203	0
Lung	FOXK2	1.37433	0.583625	0.042926	1.42016	0.0219921	0
Lung	NFE2L2	1.81755	0.712238	0.0433594	1.31835	0.0349068	6.99369e-221
Lung	RBFOX2	0.982212	0.455377	0.0441291	1.62582	0.0131934	0
Lung	ZNF184	1.79566	0.712237	0.0450851	1.24432	0.035721	3.74272e-191
Lung	ARID3A	1.33749	0.583623	0.0469465	1.26999	0.0230953	0
Lung	XRCC5	1.33519	0.583623	0.0472092	1.73368	0.0188598	0
Lung	NFE2	1.75559	0.712234	0.0484105	1.23124	0.0352343	6.57091e-193
Whole Blood	POLR2A	1.35222	0.0755303	1.10894e-52	1.10594	0.00800636	0
Whole Blood	IKZF1	1.47579	0.0920798	3.51511e-40	0.945736	0.0111271	0
Whole Blood	EP300	1.3321	0.0917523	1.96304e-34	0.844403	0.0108153	0
Whole Blood	YY1	1.42923	0.10193	3.42736e-31	0.973212	0.0120311	0
Whole Blood	POLR2G	1.57722	0.110753	8.04438e-31	1.25588	0.0125941	0
Whole Blood	DPF2	1.4784	0.108443	4.25127e-29	0.951338	0.0132611	0
Whole Blood	SIN3A	1.55004	0.112585	4.53957e-29	1.20202	0.0129174	0
Whole Blood	JUND	1.329	0.100597	1.38971e-28	0.790867	0.0121893	0
Whole Blood	FOS	1.29868	0.104265	1.0346e-25	0.576992	0.0136497	0
Whole Blood	HDAC1	1.50836	0.118748	3.71415e-25	1.07322	0.0140928	0
Whole Blood	IKZF2	1.58079	0.125278	2.34476e-24	0.936107	0.0163113	0
Whole Blood	NFIC	1.49375	0.122688	2.75381e-23	0.867235	0.015755	0
Whole Blood	TAF1	1.58919	0.129995	7.07259e-23	1.18773	0.0153687	0
Whole Blood	TCF12	1.45364	0.121861	1.21564e-22	0.966464	0.0147346	0
Whole Blood	SPI1	1.65312	0.136493	4.19627e-22	0.850479	0.0191538	0
Whole Blood	RBFOX2	1.36397	0.120259	4.35382e-21	1.20646	0.0126737	0
Whole Blood	CREM	1.51466	0.130998	5.40343e-21	1.05208	0.0157924	0
Whole Blood	MYC	1.37467	0.121853	8.18456e-21	1.09549	0.0134818	0
Whole Blood	MTA2	1.53473	0.134199	1.86786e-20	0.893833	0.0174545	0
Whole Blood	CTCF	0.848207	0.0826062	2.1472e-20	0.765289	0.00811444	0
Whole Blood	RUNX3	1.62045	0.141434	4.48752e-20	1.02611	0.0181795	0
Whole Blood	RCOR1	1.59715	0.140141	5.38585e-20	0.950919	0.0183715	0
Whole Blood	ZNF687	1.67546	0.145551	5.70067e-20	1.1056	0.0186114	0
Whole Blood	BHLHE40	1.41648	0.128984	1.46609e-19	1.07864	0.0146785	0
Whole Blood	EED	1.80852	0.156844	2.20078e-19	1.09574	0.0215306	0
Whole Blood	ELF1	1.54539	0.13888	2.23479e-19	1.1112	0.0166213	0
Whole Blood	CEBPB	1.39359	0.128016	2.32034e-19	0.581701	0.0177398	2.46005e-203
Whole Blood	NBN	1.51272	0.140128	1.81576e-18	1.04284	0.0169828	0
Whole Blood	RELB	1.62555	0.1485	2.06503e-18	0.983097	0.0195148	0
Whole Blood	MAX	1.2488	0.121036	3.17142e-18	1.08101	0.012704	0
Whole Blood	EGR1	1.46564	0.137651	3.18773e-18	1.11334	0.0158431	0
Whole Blood	SP1	1.13219	0.112547	5.68285e-18	0.891544	0.012045	0
Whole Blood	ARID1B	1.59508	0.148494	6.48121e-18	0.836474	0.0204581	4.83548e-298
Whole Blood	AGO2	1.57329	0.150042	3.152e-17	1.25213	0.0172357	0
Whole Blood	PKNOX1	1.21079	0.122659	5.75846e-17	0.756897	0.014432	0
Whole Blood	HMBOX1	1.83368	0.171389	9.00193e-17	0.778466	0.0273426	5.22727e-147
Whole Blood	NR2F2	1.42805	0.141407	1.0953e-16	0.966969	0.0169864	0
Whole Blood	BATF	2.05915	0.187952	1.26102e-16	0.905758	0.0317924	1.88872e-143
Whole Blood	ATF3	1.2572	0.128002	1.35442e-16	0.769209	0.0153415	0
Whole Blood	CTBP1	1.32035	0.134172	2.26853e-16	0.99545	0.0151111	0
Whole Blood	REST	1.14205	0.119468	2.65705e-16	0.951478	0.0125628	0
Whole Blood	FOSL2	1.63681	0.160567	4.23963e-16	0.894165	0.0220866	1.08113e-288
Whole Blood	GATA1	1.59946	0.158647	6.34986e-16	0.89838	0.0213833	1.02394131203051e-310
Whole Blood	MEF2B	1.57128	0.156798	7.36097e-16	0.998013	0.019983	0
Whole Blood	GATA2	1.41007	0.1441	8.02033e-16	0.69062	0.0193064	1.06132e-235
Whole Blood	MLLT1	1.37347	0.1414	9.2487e-16	0.998763	0.0163336	0
Whole Blood	ZBTB33	1.1799	0.125234	1.05267e-15	0.840182	0.0140413	0
Whole Blood	ETV6	1.79499	0.176371	1.89874e-15	1.00701	0.0250522	9.12149e-279
Whole Blood	ATF7	1.11046	0.120236	1.93903e-15	0.755099	0.0134985	0
Whole Blood	MTA3	1.48726	0.15329	2.85097e-15	1.13705	0.0177064	0
Whole Blood	GABPA	1.43685	0.150021	4.13625e-15	1.13434	0.0169261	0
Whole Blood	MNT	1.14879	0.125231	4.37286e-15	0.944779	0.0132614	0
Whole Blood	JUN	1.8259	0.181849	5.79334e-15	1.0833	0.0254177	0
Whole Blood	RNF2	1.28204	0.137629	5.84456e-15	1.12343	0.0144671	0
Whole Blood	RBM22	1.57755	0.162543	6.1418e-15	1.00465	0.0207419	0
Whole Blood	CBFA2T3	1.51993	0.158633	8.34518e-15	0.773018	0.0217065	2.10723e-229
Whole Blood	HDAC2	1.20619	0.132002	9.60536e-15	1.05764	0.0137369	0
Whole Blood	TEAD4	1.76109	0.179033	1.22193e-14	0.998078	0.0251171	7.25499e-273
Whole Blood	ETS1	1.69813	0.176348	2.66876e-14	1.25218	0.0215925	0
Whole Blood	ESRRA	1.52274	0.162533	3.31419e-14	1.07002	0.0196564	0
Whole Blood	ZNF217	1.42261	0.154997	4.86291e-14	0.952901	0.0187299	0
Whole Blood	RAD21	0.990415	0.114474	5.39995e-14	0.826653	0.0117941	0
Whole Blood	ARNT	1.47692	0.160539	6.61003e-14	0.994514	0.0195891	0
Whole Blood	FOXK2	1.53563	0.166751	9.93728e-14	0.999194	0.0209125	0
Whole Blood	GATAD2B	1.40784	0.156772	1.50081e-13	1.09059	0.017774	0
Whole Blood	PAX5	1.93903	0.202102	1.97513e-13	1.17295	0.0288368	1.44633e-277
Whole Blood	MTA1	1.798	0.191132	2.15814e-13	1.09564	0.0262486	6.84998e-296
Whole Blood	MEIS2	1.50142	0.166745	2.67589e-13	0.865047	0.0217685	7.23291e-280
Whole Blood	ZNF592	1.40164	0.158615	3.4708e-13	1.01494	0.0185013	0
Whole Blood	STAT3	1.41981	0.16053	3.80585e-13	0.737714	0.0212533	1.11564e-219
Whole Blood	L3MBTL2	1.23351	0.144079	5.14012e-13	1.06583	0.0151614	0
Whole Blood	SMARCE1	1.45275	0.164587	5.44283e-13	0.933314	0.0203789	0
Whole Blood	NCOR1	1.32919	0.153268	5.45574e-13	0.929403	0.0178775	0
Whole Blood	MXI1	1.27749	0.150001	9.55064e-13	1.14287	0.0156345	0
Whole Blood	SKIL	1.37982	0.162511	2.38315e-12	1.06823	0.018359	0
Whole Blood	JUNB	1.57982	0.181793	3.00849e-12	0.76823	0.02577	2.14053e-161
Whole Blood	SMARCA4	1.13979	0.140085	3.44225e-12	0.834716	0.0154973	0
Whole Blood	BCL11A	2.06635	0.225607	5.06814e-12	1.04869	0.0361853	1.3148e-144
Whole Blood	AGO1	1.65499	0.191096	5.87198e-12	1.40599	0.0215818	0
Whole Blood	NRF1	1.26884	0.154976	6.49997e-12	1.14429	0.0160851	0
Whole Blood	NR2F6	1.37676	0.166725	9.11421e-12	0.917144	0.0200405	0
Whole Blood	NFATC3	1.44909	0.17375	9.24562e-12	0.946247	0.0213854	0
Whole Blood	RXRA	1.11018	0.140082	9.92712e-12	0.856474	0.0151438	0
Whole Blood	TBX21	1.46806	0.176303	1.13044e-11	0.882747	0.0225067	8.9482e-272
Whole Blood	TCF7	1.64322	0.194531	1.77791e-11	0.865774	0.0273131	1.24572e-178
Whole Blood	KDM1A	0.980838	0.128943	2.62764e-11	0.896877	0.0128875	0
Whole Blood	TBL1XR1	1.50409	0.184717	3.97654e-11	1.14232	0.0215434	0
Whole Blood	MYNN	1.99834	0.231358	5.22808e-11	1.22238	0.033385	1.46095e-223
Whole Blood	NFATC1	1.81104	0.215171	5.70015e-11	0.991369	0.0311527	8.02926e-176
Whole Blood	TRIM22	1.21613	0.15859	9.0476e-11	0.966281	0.0172679	0
Whole Blood	PCBP1	1.71094	0.210487	1.44994e-10	1.35918	0.024917	0
Whole Blood	NCOA1	1.52726	0.194505	2.17403e-10	1.11075	0.0232624	0
Whole Blood	LEF1	1.6014	0.202009	2.22947e-10	0.999724	0.0262611	2.16426e-250
Whole Blood	SMC3	1.13536	0.153245	2.31688e-10	0.962437	0.0160721	0
Whole Blood	E4F1	1.4512	0.187798	2.71325e-10	1.05709	0.0221191	0
Whole Blood	CBFB	1.6739	0.210477	2.91891e-10	1.14986	0.0266418	1.82784550855906e-313
Whole Blood	HNRNPL	1.51007	0.194502	3.1317e-10	1.3161	0.0212198	0
Whole Blood	ASH2L	1.0772	0.148428	3.74153e-10	1.14092	0.0140877	0
Whole Blood	ZFX	1.20468	0.164552	5.68271e-10	1.03246	0.0173481	0
Whole Blood	E2F1	1.51266	0.198137	6.20555e-10	1.00531	0.0245966	3.75087e-288
Whole Blood	ZNF207	1.71961	0.220129	7.57666e-10	1.15971	0.0283987	2.45198e-280
Whole Blood	RB1	1.49238	0.198133	9.38071e-10	1.26591	0.0218709	0
Whole Blood	ZEB2	1.39254	0.187787	9.95586e-10	0.983646	0.0221671	0
Whole Blood	GATA4	1.95327	0.244398	1.01275e-09	1.13662	0.0357718	4.92479e-171
Whole Blood	NFE2L2	1.7557	0.225496	1.035e-09	0.798993	0.0345517	3.09423e-97
Whole Blood	ZBED1	1.68299	0.220119	1.42767e-09	1.05851	0.0290957	2.35608e-226
Whole Blood	KDM5B	1.6316	0.21512	1.48889e-09	1.26932	0.0254044	0
Whole Blood	GABPB1	1.40674	0.194482	2.70869e-09	1.15012	0.021581	0
Whole Blood	CBFA2T2	1.50448	0.206079	3.18472e-09	0.838401	0.0273834	1.21486e-167
Whole Blood	ZNF579	1.80579	0.237542	3.20731e-09	1.07995	0.0330934	6.5637e-182
Whole Blood	SMARCC2	1.63131	0.220105	3.46147e-09	0.883722	0.0305596	1.94771e-148
Whole Blood	SOX6	1.36355	0.191038	3.50291e-09	0.968534	0.0223831	0
Whole Blood	TRIM24	1.32401	0.187776	4.41207e-09	0.844233	0.0227477	2.04932e-245
Whole Blood	E2F8	1.7233	0.231262	4.43207e-09	1.15513	0.0299667	3.87839e-250
Whole Blood	ZNF24	1.13851	0.166693	5.15537e-09	0.970077	0.0174731	0
Whole Blood	TAL1	1.44137	0.201974	5.20913e-09	0.829521	0.0261108	9.43257e-181
Whole Blood	SRF	1.59604	0.220096	6.2985e-09	0.973014	0.0289039	3.85384e-197
Whole Blood	GMEB1	1.42739	0.201972	6.81514e-09	1.19166	0.0222661	0
Whole Blood	HNF4A	0.991573	0.14997	7.24613e-09	0.731039	0.0161772	0
Whole Blood	ZNF143	1.12321	0.166691	7.58755e-09	1.06349	0.0166912	0
Whole Blood	FOXA1	0.896135	0.137593	9.30643e-09	0.577733	0.0151156	2.34882e-276
Whole Blood	HNRNPLL	1.34591	0.194471	9.35239e-09	1.33676	0.0194355	0
Whole Blood	NR3C1	1.3449	0.194471	9.54583e-09	1.02073	0.0220948	0
Whole Blood	IRF4	1.73212	0.237518	9.72753e-09	1.0626	0.0321442	3.1039e-187
Whole Blood	ATF2	0.91333	0.141354	1.08324e-08	0.458499	0.0164962	4.92281e-151
Whole Blood	BCL3	1.43677	0.206065	1.12689e-08	1.03156	0.0243928	4.59669e-307
Whole Blood	SMAD1	1.71963	0.237514	1.17214e-08	1.10933	0.031325	5.99507e-213
Whole Blood	NFRKB	1.42879	0.206064	1.30571e-08	0.979146	0.0248409	1.97268e-269
Whole Blood	HCFC1	1.59405	0.225451	1.46501e-08	1.22679	0.0266104	0
Whole Blood	HES1	1.83962	0.251786	1.46593e-08	1.01256	0.0367319	6.62226e-132
Whole Blood	ARID3A	1.26389	0.187766	1.58343e-08	0.878548	0.0217685	5.98552e-288
Whole Blood	MEF2A	1.7484	0.244323	1.95186e-08	1.03163	0.0337847	8.11841e-161
Whole Blood	TBP	1.10419	0.171263	2.92843e-08	1.15916	0.0163511	0
Whole Blood	ZSCAN29	1.53531	0.225436	3.74699e-08	1.07791	0.0274976	6.85237e-262
Whole Blood	EZH2	1.05875	0.166684	3.7525e-08	1.22422	0.0151768	0
Whole Blood	RUNX1	2.24162	0.303354	5.10224e-08	1.31231	0.0477447	2.90839e-125
Whole Blood	RBM39	1.18268	0.184664	5.18815e-08	1.28022	0.0174445	0
Whole Blood	E2F6	1.51344	0.225431	5.29729e-08	1.32612	0.0245698	0
Whole Blood	SMARCA5	1.22867	0.191016	5.59949e-08	1.04789	0.0202764	0
Whole Blood	ZNF184	1.60634	0.237481	6.22752e-08	0.981762	0.0312622	1.94296e-171
Whole Blood	ZNF384	1.27253	0.198093	7.06666e-08	0.810617	0.0237645	6.12549e-209
Whole Blood	PHF8	1.21207	0.191014	7.80215e-08	1.26399	0.0184204	0
Whole Blood	EP400	1.2368	0.194453	8.1112e-08	1.06156	0.020609	0
Whole Blood	FOSL1	2.33659	0.318119	8.63372e-08	1.17154	0.0556511	9.12703e-76
Whole Blood	NR2F1	1.25657	0.19809	9.55497e-08	0.963261	0.0220916	0
Whole Blood	BACH1	1.39093	0.215066	9.60452e-08	1.15904	0.0236202	0
Whole Blood	KDM5A	1.51464	0.231205	1.10012e-07	1.1815	0.0267473	0
Whole Blood	SOX13	1.9001	0.279062	1.61085e-07	0.941892	0.0432952	6.25593e-84
Whole Blood	MBD2	1.4883	0.231199	1.63162e-07	1.15996	0.0266392	1.59543184289409e-318
Whole Blood	SKI	1.28309	0.206037	1.80596e-07	1.0704	0.0222633	0
Whole Blood	RFX1	1.16871	0.191007	1.83688e-07	0.829098	0.0216001	3.2286e-263
Whole Blood	PRDM10	1.38545	0.220048	2.01334e-07	1.04386	0.0252914	6.79826e-292
Whole Blood	PBX3	2.09883	0.303264	2.07504e-07	1.22237	0.0461474	6.42382e-118
Whole Blood	MGA	1.21329	0.198083	2.14594e-07	1.03073	0.0210271	0
Whole Blood	ZNF318	1.85055	0.279041	2.79641e-07	0.944719	0.0421913	1.07837e-88
Whole Blood	ZNF263	1.14564	0.191004	2.8787e-07	1.05604	0.0194115	0
Whole Blood	TAF15	1.44438	0.231189	3.12845e-07	1.41041	0.023563	0
Whole Blood	FOXA2	0.904372	0.156715	3.22308e-07	0.550878	0.017536	3.68881e-188
Whole Blood	SUZ12	1.29829	0.215048	4.42887e-07	1.37941	0.0206599	0
Whole Blood	PML	1.46673	0.237445	4.5942e-07	1.13909	0.0273129	2.76321e-293
Whole Blood	HDAC3	1.80133	0.279021	4.81509e-07	0.86886	0.0425484	4.42879e-75
Whole Blood	ZBTB2	1.54904	0.251692	6.80292e-07	1.16165	0.0298816	4.02132e-254
Whole Blood	TFAP4	1.38942	0.231176	6.98509e-07	1.11016	0.0259063	4.83499136803164e-311
Whole Blood	KLF5	1.67512	0.268921	7.79091e-07	1.18075	0.0337253	7.80936e-206
Whole Blood	GATA3	0.877567	0.156713	8.99555e-07	0.503757	0.0176715	5.00281e-157
Whole Blood	CBX1	1.57819	0.259864	1.04913e-06	1.2067	0.0307282	1.68732e-257
Whole Blood	USF1	1.24015	0.215038	1.12829e-06	0.870888	0.0247683	3.15797e-219
Whole Blood	ZBTB7A	1.27508	0.220026	1.13784e-06	1.32589	0.02135	0
Whole Blood	HDAC6	2.04658	0.317924	1.16055e-06	1.27146	0.0462173	3.63567e-126
Whole Blood	STAT5A	1.3913	0.237428	1.31187e-06	1.0484	0.0273355	4.9366e-252
Whole Blood	NFE2	1.49004	0.251676	1.4392e-06	0.859771	0.0329946	1.9844e-121
Whole Blood	ZNF282	1.60332	0.268897	1.77358e-06	1.18352	0.0325116	2.73188e-222
Whole Blood	CREB3L1	1.3466	0.237418	2.41663e-06	1.1873	0.0252402	0
Whole Blood	ZNF444	1.26158	0.225377	2.45051e-06	1.0628	0.0241933	0
Whole Blood	ZBTB40	1.05446	0.194428	2.453e-06	0.932417	0.0199113	0
Whole Blood	BRD4	1.57065	0.268887	2.56766e-06	1.17454	0.0321103	1.00166e-224
Whole Blood	EHMT2	1.21588	0.220016	2.80448e-06	0.743253	0.0264736	4.23645e-144
Whole Blood	CHD4	1.33313	0.237415	2.90005e-06	0.962303	0.0275511	2.16593e-212
Whole Blood	PHF21A	1.93772	0.317864	3.00714e-06	1.21926	0.0447359	8.85776e-125
Whole Blood	KDM4A	1.17058	0.215026	3.36389e-06	1.36045	0.019565	0
Whole Blood	AFF1	1.31184	0.23741	3.86321e-06	1.00729	0.0267483	9.40885e-245
Whole Blood	ATF4	1.13009	0.210368	3.93136e-06	0.56881	0.0261947	2.20832e-90
Whole Blood	CC2D1A	1.26704	0.231151	3.98077e-06	0.92666	0.0263597	1.20707e-216
Whole Blood	CBX3	1.25208	0.231149	4.90061e-06	1.00537	0.025306	3.10017e-272
Whole Blood	ETV4	1.39034	0.251652	4.97239e-06	1.13012	0.0279986	3.30054e-275
Whole Blood	XRCC5	1.08665	0.206006	5.03859e-06	1.20852	0.019124	0
Whole Blood	TAF9B	1.50587	0.268868	5.3027e-06	1.00287	0.0334268	3.82099e-156
Whole Blood	NR2C1	1.49334	0.268865	6.0931e-06	1.04565	0.0326223	1.24085e-176
Whole Blood	BCOR	1.07469	0.206004	6.11645e-06	0.941137	0.021235	0
Whole Blood	ZNF639	1.36654	0.251646	6.65071e-06	1.15684	0.0273673	2.09697e-300
Whole Blood	NEUROD1	1.48201	0.268861	6.90575e-06	1.16108	0.0309072	1.9482e-237
Whole Blood	MAFF	1.03092	0.201908	8.26568e-06	0.432812	0.0254338	4.75441e-58
Whole Blood	RAD51	1.09494	0.215014	1.06584e-05	0.889087	0.0228908	3.36886e-266
Whole Blood	ZHX2	1.42951	0.268847	1.22798e-05	1.16037	0.0301256	1.49656e-249
Whole Blood	USF2	1.2798	0.251627	1.88459e-05	1.04385	0.0274918	2.83014e-247
Whole Blood	TBX3	1.43044	0.278898	2.44326e-05	0.953898	0.0341237	6.03813e-137
Whole Blood	PAX8	1.89885	0.355111	3.76449e-05	0.809941	0.058455	6.64569e-36
Whole Blood	BMI1	1.26791	0.259785	3.84705e-05	0.896423	0.0300546	2.16643e-157
Whole Blood	EBF1	1.13412	0.237377	3.8952e-05	0.947151	0.0251471	1.69977e-247
Whole Blood	SMAD5	1.16236	0.244178	4.47313e-05	1.2243	0.0233695	0
Whole Blood	BRD9	1.36731	0.278881	4.60469e-05	1.08012	0.0313479	1.24876e-202
Whole Blood	HNF4G	1.11717	0.237374	4.81534e-05	0.821833	0.0263176	5.98771e-175
Whole Blood	C11orf30	0.901716	0.194409	4.87127e-05	0.57713	0.0215495	2.59961e-136
Whole Blood	SIN3B	1.55208	0.317697	7.67813e-05	1.27856	0.0360538	3.62743e-208
Whole Blood	PYGO2	2.18208	0.409972	7.68586e-05	1.06141	0.0697291	3.74981e-41
Whole Blood	FIP1L1	1.41972	0.302977	0.000109277	1.33965	0.0314139	7.71613e-298
Whole Blood	FOXM1	1.27605	0.278859	0.000112713	0.991374	0.0311141	2.92799e-176
Whole Blood	ELF4	1.18595	0.26879	0.000157943	1.08365	0.0275881	1.49936e-262
Whole Blood	RLF	1.53373	0.334758	0.00019685	1.25631	0.0380004	1.00513e-181
Whole Blood	CLOCK	1.27837	0.290143	0.000198539	1.1033	0.0309189	2.13997e-216
Whole Blood	RFX5	1.1076	0.259753	0.000215727	1.06642	0.025838	9.77275e-291
Whole Blood	KLF16	1.33626	0.302953	0.000221845	1.03824	0.03415	2.76461e-159
Whole Blood	CUX1	1.0957	0.25975	0.00024413	0.781052	0.029025	1.90981e-131
Whole Blood	STAT1	1.42546	0.33472	0.00042802	1.27187	0.0357863	2.87063e-209
Whole Blood	CHAMP1	1.18455	0.290121	0.000453801	0.654953	0.0358359	3.14946e-63
Whole Blood	POU2F2	1.23723	0.302928	0.000502339	1.17556	0.0306994	4.42321e-246
Whole Blood	KDM4B	1.50947	0.35493	0.000512082	1.27986	0.0394358	1.2728e-174
Whole Blood	TCF7L2	1.10123	0.278821	0.000579983	1.0115	0.0283013	1.97893e-220
Whole Blood	U2AF2	2.03652	0.448818	0.000584326	1.13157	0.0689622	4.55612e-47
Whole Blood	U2AF1	1.36516	0.334701	0.000653625	1.28904	0.034491	1.13105e-230
Whole Blood	NFIB	0.990774	0.259732	0.000706332	0.738423	0.0280819	8.91574e-127
Whole Blood	TAF7	1.34986	0.334696	0.000726909	1.24084	0.0349132	3.52338e-210
Whole Blood	GATAD2A	1.33177	0.334691	0.000823778	1.21153	0.0350224	4.56746e-200
Whole Blood	TRIM28	0.707668	0.19439	0.000832351	0.742528	0.0182557	6.7162e-301
Whole Blood	IRF1	1.05153	0.278811	0.000905399	1.18636	0.0256734	0
Whole Blood	MITF	0.884603	0.244133	0.00103107	0.739435	0.0250364	2.32527e-159
Whole Blood	ZBTB11	1.49376	0.379297	0.00122993	1.23716	0.0425663	2.88099e-141
Whole Blood	SRSF4	2.16749	0.501746	0.00129166	1.15032	0.0816704	4.5552e-35
Whole Blood	PRPF4	1.343	0.354872	0.00146523	1.27997	0.0363102	1.13271e-205
Whole Blood	HNF1A	1.24645	0.334666	0.0014725	0.881517	0.0386156	3.51807e-93
Whole Blood	MAFK	0.585103	0.168881	0.00153428	0.398709	0.0173534	2.56015e-105
Whole Blood	ESR1	1.02792	0.290089	0.0016923	0.79257	0.0312124	6.33275e-117
Whole Blood	THAP1	1.7836	0.448635	0.00176967	1.25072	0.0578441	6.51187e-79
Whole Blood	ZNF507	2.03903	0.50162	0.00205243	0.933734	0.0840296	2.72255e-23
Whole Blood	DACH1	1.11971	0.317573	0.00207687	0.855806	0.0347949	1.92044e-108
Whole Blood	NFYB	1.25588	0.354845	0.00249279	1.00419	0.0390272	3.74842e-115
Whole Blood	ZBTB5	1.50414	0.409548	0.00256184	1.00465	0.0509621	2.16407e-68
Whole Blood	HNRNPK	0.890671	0.268737	0.00256832	0.853752	0.0263119	1.66274e-187
Whole Blood	DNMT1	1.95606	0.501547	0.00275862	1.06053	0.0763408	1.58081e-34
Whole Blood	ZNF316	0.589601	0.184602	0.00290267	0.427633	0.0187831	1.13061e-102
Whole Blood	CCAR2	1.91214	0.501511	0.00322223	1.16882	0.0713437	1.16297e-46
Whole Blood	ZBTB7B	1.30874	0.379229	0.00341357	0.986752	0.0431462	8.50848e-92
Whole Blood	ARID2	1.30242	0.379227	0.00353143	1.07259	0.0414661	3.46837e-115
Whole Blood	SAP30	1.03395	0.317554	0.00377869	1.29913	0.0276819	0
Whole Blood	IRF2	1.42275	0.409514	0.00379591	1.18225	0.0453994	1.03806e-114
Whole Blood	ASH1L	1.38059	0.409497	0.00463959	1.0684	0.0466387	7.84047e-91
Whole Blood	SIX5	1.23525	0.379205	0.00504803	1.16273	0.0386153	3.67077e-153
Whole Blood	UBTF	0.941092	0.317535	0.00704776	1.31574	0.0262698	0
Whole Blood	PHF20	1.04848	0.35479	0.00831703	1.19962	0.03244	8.99298e-229
Whole Blood	ZNF574	1.63676	0.501317	0.00835585	1.01803	0.0662949	3.17573e-42
Whole Blood	NCOA3	1.24255	0.409447	0.00881338	0.738568	0.0502454	6.68245e-41
Whole Blood	ZEB1	1.38413	0.448426	0.00929822	1.22288	0.0479621	2.16086e-109
Whole Blood	ZMYM3	0.686946	0.251532	0.0116649	0.794123	0.0228712	3.26869e-217
Whole Blood	IRF3	1.53721	0.501259	0.0116715	1.25014	0.0572117	1.47955e-80
Whole Blood	ZKSCAN1	0.908934	0.334587	0.0123797	1.00314	0.0310112	3.1593e-181
Whole Blood	HNRNPH1	1.84112	0.578829	0.0127288	1.31527	0.0748348	2.4279e-52
Whole Blood	CDC5L	1.49198	0.501234	0.0135572	1.15193	0.0582724	3.07007e-67
Whole Blood	ELK1	1.03683	0.37915	0.0138607	1.2716	0.0334621	5.35594e-239
Whole Blood	NFXL1	1.13183	0.409412	0.0144715	0.870355	0.0448786	6.24112e-68
Whole Blood	WRNIP1	1.22951	0.448365	0.0170029	1.20437	0.0447555	5.86818e-122
Whole Blood	MEF2C	1.19503	0.448353	0.0193846	1.06214	0.0467039	1.37361e-89
Whole Blood	MYB	1.65421	0.578681	0.0207401	1.22463	0.0707682	2.02166e-51
Whole Blood	RBM14	1.63845	0.578669	0.0215983	1.40185	0.0653058	2.46487e-76
Whole Blood	HSF1	1.63517	0.578667	0.0217815	1.19299	0.0710291	9.02012e-49
Whole Blood	ZZZ3	1.62619	0.578661	0.0222894	1.04365	0.0753178	1.40979e-34
Whole Blood	PCBP2	1.33726	0.501158	0.0223881	0.733536	0.0646508	4.46884e-25
Whole Blood	CREB1	0.457372	0.19437	0.0276157	0.556483	0.0175404	1.43593e-191
Whole Blood	ARHGAP35	1.49606	0.578575	0.0310106	0.992914	0.0721361	1.96461e-34
Whole Blood	KAT2A	3.39365	1.00747	0.0335067	0.980035	0.324347	0.00524164
Whole Blood	WHSC1	1.92564	0.708764	0.0352823	0.790115	0.11962	1.84775e-09
Whole Blood	DEAF1	1.41192	0.578525	0.0382332	1.23544	0.0624342	1.51067e-66
Whole Blood	THRA	1.83151	0.70866	0.041783	0.616959	0.123295	3.94225e-06
Whole Blood	KAT8	1.7441	0.708572	0.0488106	0.803573	0.108602	1.80045e-11
Meta-analysis	IKZF1	1.46561	0.0723835	3.70916e-91	1.17186	0.113739	6.82797e-25
Meta-analysis	SIN3A	1.60829	0.0858225	2.34622e-78	1.52498	0.161526	3.68833e-21
Meta-analysis	DPF2	1.47436	0.0855889	1.69332e-66	1.18055	0.115	1.00623e-24
Meta-analysis	POLR2G	1.66355	0.099572	1.16607e-62	1.56021	0.152986	2.01616e-24
Meta-analysis	TCF12	1.50275	0.0938114	9.44083e-58	1.24156	0.137649	1.88516e-19
Meta-analysis	FOS	1.3968	0.089991	2.48185e-54	0.800231	0.112992	1.41907e-12
Meta-analysis	IKZF2	1.5444	0.0999605	7.53461e-54	1.14094	0.103278	2.25958e-28
Meta-analysis	HDAC1	1.46608	0.0949418	8.55722e-54	1.35157	0.139225	2.79377e-22
Meta-analysis	NFIC	1.48749	0.0965213	1.38115e-53	1.07469	0.104616	9.35074e-25
Meta-analysis	EGR1	1.55943	0.103299	1.71374e-51	1.43212	0.159472	2.6994e-19
Meta-analysis	RCOR1	1.62787	0.108766	1.20998e-50	1.24943	0.149337	5.93676e-17
Meta-analysis	ZNF687	1.68104	0.113872	2.55134e-49	1.41557	0.155506	8.78593e-20
Meta-analysis	RUNX3	1.62578	0.111273	2.40034e-48	1.25842	0.117044	5.81941e-27
Meta-analysis	NBN	1.55468	0.108174	7.74264e-47	1.2897	0.12356	1.66421e-25
Meta-analysis	AGO2	1.70069	0.118413	8.91616e-47	1.52428	0.136663	6.88294e-29
Meta-analysis	JUN	1.97149	0.138635	6.81338e-46	1.39669	0.156868	5.40701e-19
Meta-analysis	BATF	2.07304	0.147566	7.89642e-45	1.05352	0.0856551	9.10823e-35
Meta-analysis	ATF3	1.33144	0.0973304	1.34359e-42	0.994292	0.112779	1.18305e-18
Meta-analysis	MTA2	1.46841	0.108773	1.56916e-41	1.06854	0.0899948	1.62873e-32
Meta-analysis	ELF1	1.70593	0.127847	1.29203e-40	1.44169	0.165494	2.99944e-18
Meta-analysis	RELB	1.57788	0.119022	4.11096e-40	1.21056	0.114869	5.73174e-26
Meta-analysis	MLLT1	1.49767	0.113014	4.39225e-40	1.2183	0.10998	1.61343e-28
Meta-analysis	CEBPB	1.35514	0.102813	1.13599e-39	0.780879	0.102179	2.13475e-14
Meta-analysis	GATAD2B	1.51577	0.117468	4.29075e-38	1.39355	0.15216	5.26317e-20
Meta-analysis	MEIS2	1.60663	0.124995	8.22018e-38	1.12193	0.129452	4.44589e-18
Meta-analysis	PAX5	2.00201	0.155976	1.03833e-37	1.48452	0.155914	1.70792e-21
Meta-analysis	ETS1	1.88196	0.147938	4.50311e-37	1.59988	0.17393	3.63279e-20
Meta-analysis	FOXK2	1.61336	0.126866	4.75512e-37	1.27474	0.137967	2.4771e-20
Meta-analysis	NR2F2	1.55718	0.122544	5.39941e-37	1.22261	0.128486	1.80827e-21
Meta-analysis	CREM	1.68019	0.132967	1.3347e-36	1.35367	0.150844	2.86119e-19
Meta-analysis	PKNOX1	1.21039	0.0965049	4.38426e-36	0.989071	0.116805	2.50323e-17
Meta-analysis	JUND	1.45568	0.116664	9.89761e-36	1.05687	0.133096	2.01113e-15
Meta-analysis	TAF1	1.74868	0.141215	3.22871e-35	1.54502	0.178655	5.23936e-18
Meta-analysis	MTA3	1.4912	0.120662	4.38317e-35	1.42315	0.143378	3.21349e-23
Meta-analysis	NCOR1	1.42178	0.115255	5.80157e-35	1.16436	0.117645	4.28204e-23
Meta-analysis	ESRRA	1.55025	0.125893	7.60672e-35	1.36609	0.148111	2.87932e-20
Meta-analysis	ZBTB33	1.19205	0.0973093	1.67701e-34	1.05414	0.107161	7.80783e-23
Meta-analysis	RBFOX2	1.44436	0.118277	2.6959e-34	1.49785	0.146083	1.14233e-24
Meta-analysis	ETV6	1.74497	0.143165	3.57746e-34	1.19883	0.0993198	1.51365e-33
Meta-analysis	GATA2	1.39437	0.114555	4.3823e-34	0.889639	0.100437	8.17002e-19
Meta-analysis	ATF7	1.13487	0.0934115	5.79815e-34	0.987424	0.116344	2.11883e-17
Meta-analysis	CBFA2T3	1.50967	0.124972	1.34567e-33	0.942859	0.0879784	8.47596e-27
Meta-analysis	ZNF592	1.48382	0.123069	1.78559e-33	1.25686	0.121407	4.07857e-25
Meta-analysis	SKIL	1.47823	0.124976	2.79412e-32	1.33879	0.135402	4.71749e-23
Meta-analysis	MEF2B	1.48857	0.127849	2.48714e-31	1.18084	0.0932376	9.26113e-37
Meta-analysis	ARNT	1.46892	0.126854	5.23151e-31	1.23761	0.122214	4.21066e-24
Meta-analysis	STAT3	1.44162	0.124953	8.55807e-31	0.998297	0.133717	8.28166e-14
Meta-analysis	BCL11A	2.05406	0.17824	9.97393e-31	1.24209	0.0993909	7.7459e-36
Meta-analysis	GATA4	2.08611	0.181085	1.0459e-30	1.47926	0.171602	6.67727e-18
Meta-analysis	GATA1	1.50656	0.130948	1.24469e-30	1.10426	0.10438	3.72303e-26
Meta-analysis	ZNF217	1.39111	0.12316	1.38706e-29	1.24088	0.144061	7.08356e-18
Meta-analysis	YY1	1.61269	0.142947	1.61451e-29	1.27813	0.152516	5.2771e-17
Meta-analysis	CTBP1	1.45176	0.12908	2.39795e-29	1.28577	0.145218	8.4357e-19
Meta-analysis	EP300	1.54122	0.140177	4.04857e-28	1.12256	0.140023	1.08429e-15
Meta-analysis	SMARCE1	1.42428	0.130889	1.41069e-27	1.18057	0.124922	3.37189e-21
Meta-analysis	AGO1	1.62681	0.15237	1.30808e-26	1.72151	0.158873	2.32956e-27
Meta-analysis	SMARCA4	1.15315	0.109329	5.21668e-26	1.06512	0.115322	2.55643e-20
Meta-analysis	TRIM22	1.2752	0.121444	8.60864e-26	1.26484	0.149407	2.54548e-17
Meta-analysis	TBL1XR1	1.50881	0.144488	1.58544e-25	1.41486	0.136894	4.87283e-25
Meta-analysis	MYNN	1.94894	0.187118	2.10572e-25	1.50696	0.142542	4.01645e-26
Meta-analysis	GABPA	1.65431	0.158888	2.19031e-25	1.44999	0.157889	4.1702e-20
Meta-analysis	TEAD4	1.64851	0.159934	6.51871e-25	1.222	0.112909	2.68325e-27
Meta-analysis	POLR2A	1.62181	0.157673	8.15533e-25	1.3549	0.124559	1.47418e-27
Meta-analysis	NFE2L2	1.78214	0.175493	3.14579e-24	1.13508	0.16842	1.58865e-11
Meta-analysis	MXI1	1.46839	0.145673	6.76721e-24	1.46953	0.163354	2.34203e-19
Meta-analysis	SOX6	1.4445	0.144484	1.56076e-23	1.24801	0.140148	5.3433e-19
Meta-analysis	NFATC3	1.39419	0.140366	3.00627e-23	1.14947	0.10399	2.10508e-28
Meta-analysis	NFATC1	1.76979	0.178285	3.18384e-23	1.1132	0.1227	1.16226e-19
Meta-analysis	PCBP1	1.6658	0.168128	3.84547e-23	1.72509	0.183417	5.18691e-21
Meta-analysis	JUNB	1.48786	0.150702	5.45751e-23	0.920165	0.081014	6.76082e-30
Meta-analysis	HES1	1.90735	0.193783	7.3716e-23	1.22931	0.11156	3.08584e-28
Meta-analysis	RB1	1.51626	0.15408	7.52036e-23	1.62546	0.180352	2.00978e-19
Meta-analysis	NRF1	1.42886	0.146226	1.49084e-22	1.49959	0.177685	3.18456e-17
Meta-analysis	GABPB1	1.45149	0.149034	2.04911e-22	1.48623	0.1681	9.45653e-19
Meta-analysis	MTA1	1.66883	0.171686	2.47094e-22	1.38964	0.147362	4.09697e-21
Meta-analysis	E4F1	1.43304	0.149032	6.86464e-22	1.36662	0.154857	1.09412e-18
Meta-analysis	MBD2	1.62996	0.17047	1.16003e-21	1.51579	0.177981	1.64309e-17
Meta-analysis	BACH1	1.53467	0.160546	1.18788e-21	1.47182	0.156452	5.08038e-21
Meta-analysis	HCFC1	1.65138	0.17294	1.3113e-21	1.62977	0.202055	7.26531e-16
Meta-analysis	E2F8	1.75597	0.18402	1.39781e-21	1.40482	0.249783	1.86398e-08
Meta-analysis	BCL3	1.50205	0.157679	1.63419e-21	1.29151	0.130231	3.50845e-23
Meta-analysis	CBFB	1.61868	0.170504	2.23348e-21	1.393	0.122274	4.56049e-30
Meta-analysis	ARID3A	1.32899	0.143051	1.53817e-20	1.13685	0.129327	1.48933e-18
Meta-analysis	IRF4	1.72923	0.187056	2.36396e-20	1.29508	0.117415	2.74031e-28
Meta-analysis	E2F1	1.47074	0.159643	3.18133e-20	1.33097	0.163292	3.61293e-16
Meta-analysis	ZNF318	1.97571	0.214542	3.293e-20	1.11773	0.173847	1.28099e-10
Meta-analysis	KDM5B	1.58985	0.172937	3.81261e-20	1.64522	0.188065	2.16895e-18
Meta-analysis	SMAD1	1.74429	0.19039	5.11002e-20	1.32767	0.218563	1.24316e-09
Meta-analysis	EP400	1.35798	0.148899	7.50312e-20	1.3565	0.14756	3.82441e-20
Meta-analysis	ZSCAN29	1.57373	0.172899	8.86253e-20	1.38774	0.154987	3.43225e-19
Meta-analysis	MYC	1.64465	0.180758	9.14806e-20	1.42376	0.164201	4.29054e-18
Meta-analysis	TAL1	1.44845	0.159646	1.15928e-19	1.01144	0.0926245	9.26782e-28
Meta-analysis	CBFA2T2	1.48077	0.163695	1.48412e-19	1.00656	0.0867829	4.18915e-31
Meta-analysis	ZEB2	1.36055	0.150671	1.71768e-19	1.21947	0.118495	7.71163e-25
Meta-analysis	NR3C1	1.52303	0.169992	3.26307e-19	1.31334	0.146661	3.39889e-19
Meta-analysis	MEF2A	1.72902	0.193768	4.53344e-19	1.22365	0.0978057	6.49471e-36
Meta-analysis	FOSL1	2.30797	0.259574	6.03487e-19	1.39695	0.225801	6.14538e-10
Meta-analysis	NCOA1	1.45332	0.163804	7.16636e-19	1.32205	0.211429	4.0282e-10
Meta-analysis	ZNF579	1.74709	0.197516	9.12781e-19	1.31231	0.232516	1.66182e-08
Meta-analysis	RUNX1	2.19436	0.251355	2.54392e-18	1.5602	0.248103	3.20516e-10
Meta-analysis	SMARCA5	1.27628	0.147494	5.01192e-18	1.28061	0.116593	4.58184e-28
Meta-analysis	ZBED1	1.56978	0.183981	1.43452e-17	1.25723	0.102321	1.06106e-34
Meta-analysis	SMARCC2	1.54421	0.181002	1.44537e-17	1.11049	0.115031	4.73484e-22
Meta-analysis	NR2F1	1.29256	0.152287	2.10879e-17	1.1662	0.101804	2.21022e-30
Meta-analysis	FOSL2	1.82183	0.214808	2.22842e-17	1.2168	0.162229	6.35731e-14
Meta-analysis	ZNF384	1.3067	0.154098	2.25788e-17	1.00543	0.0978665	9.27924e-25
Meta-analysis	MAX	1.53447	0.181504	2.81022e-17	1.40193	0.160529	2.47605e-18
Meta-analysis	ZNF639	1.54143	0.183912	5.23287e-17	1.4815	0.162752	8.80502e-20
Meta-analysis	CHD4	1.47079	0.175498	5.26492e-17	1.14375	0.092515	4.15274e-35
Meta-analysis	NR2F6	1.59095	0.191145	8.55774e-17	1.12185	0.102629	8.1876e-28
Meta-analysis	ZNF207	1.60638	0.193172	9.11144e-17	1.40953	0.249928	1.70305e-08
Meta-analysis	RBM22	1.44591	0.174241	1.05591e-16	1.22126	0.108542	2.2782e-29
Meta-analysis	NFE2	1.57174	0.190275	1.45205e-16	1.08492	0.114709	3.14006e-21
Meta-analysis	SOX13	1.85061	0.224839	1.85901e-16	1.24145	0.150181	1.38132e-16
Meta-analysis	TBX21	1.48544	0.182962	4.70807e-16	1.03104	0.0770533	7.81965e-41
Meta-analysis	NFRKB	1.38164	0.17053	5.40656e-16	1.17525	0.196289	2.13268e-09
Meta-analysis	BHLHE40	1.74431	0.215951	6.62044e-16	1.38734	0.154624	2.90164e-19
Meta-analysis	ARID1B	1.42705	0.177579	9.27186e-16	1.00747	0.0873537	8.96897e-31
Meta-analysis	AFF1	1.42448	0.17816	1.29024e-15	1.25304	0.123156	2.57809e-24
Meta-analysis	ZNF263	1.35083	0.169258	1.45255e-15	1.33252	0.138614	7.03794e-22
Meta-analysis	PBX3	2.05732	0.25961	2.28733e-15	1.51403	0.150599	8.87455e-24
Meta-analysis	EED	1.62671	0.205516	2.46802e-15	1.30311	0.105201	3.07871e-35
Meta-analysis	PML	1.47115	0.187014	3.64549e-15	1.44009	0.150743	1.25615e-21
Meta-analysis	MNT	1.40805	0.180581	6.32197e-15	1.22985	0.142619	6.50589e-18
Meta-analysis	L3MBTL2	1.38589	0.177978	6.86931e-15	1.37922	0.156731	1.36897e-18
Meta-analysis	ATF2	0.875719	0.113145	9.95725e-15	0.619514	0.0829646	8.19138e-14
Meta-analysis	RNF2	1.42464	0.185447	1.5639e-14	1.39373	0.135383	7.44445e-25
Meta-analysis	SRF	1.46211	0.190433	1.61829e-14	1.25514	0.141362	6.74994e-19
Meta-analysis	HDAC2	1.51045	0.197487	2.03618e-14	1.34231	0.14239	4.22154e-21
Meta-analysis	ZNF24	1.24899	0.163802	2.44076e-14	1.19189	0.11122	8.51429e-27
Meta-analysis	ZHX2	1.53224	0.201253	2.66803e-14	1.53359	0.186839	2.24758e-16
Meta-analysis	ZNF444	1.31523	0.172867	2.77694e-14	1.38765	0.162902	1.61851e-17
Meta-analysis	ZBTB2	1.52538	0.201254	3.47141e-14	1.47266	0.155753	3.22707e-21
Meta-analysis	TAF15	1.65185	0.219047	4.66187e-14	1.68777	0.27736	1.16404e-09
Meta-analysis	TAF9B	1.57922	0.209794	5.1727e-14	1.2352	0.232499	1.08009e-07
Meta-analysis	RFX1	1.13934	0.152286	7.3422e-14	1.08583	0.128671	3.20697e-17
Meta-analysis	KDM5A	1.42321	0.190308	7.52057e-14	1.52317	0.172002	8.32937e-19
Meta-analysis	RAD51	1.20675	0.161625	8.24576e-14	1.12381	0.11802	1.6957e-21
Meta-analysis	ZNF184	1.50026	0.201341	9.24001e-14	1.15888	0.0894954	2.37809e-38
Meta-analysis	TCF7	1.82014	0.246763	1.63038e-13	1.1228	0.129063	3.32916e-18
Meta-analysis	ZFX	1.41806	0.193292	2.19538e-13	1.35799	0.163199	8.71682e-17
Meta-analysis	KLF5	1.60851	0.219425	2.29191e-13	1.52855	0.174065	1.61364e-18
Meta-analysis	ZBTB40	1.10422	0.150658	2.31356e-13	1.19017	0.129057	2.91322e-20
Meta-analysis	HDAC3	1.71906	0.236964	4.03144e-13	1.02124	0.153474	2.84951e-11
Meta-analysis	CBX1	1.51355	0.209735	5.33496e-13	1.52611	0.16015	1.58348e-21
Meta-analysis	NEUROD1	1.51248	0.209718	5.51413e-13	1.46671	0.153042	9.35831e-22
Meta-analysis	NR2C1	1.50909	0.209716	6.20505e-13	1.32801	0.141467	6.14775e-21
Meta-analysis	HDAC6	1.92247	0.268486	8.04336e-13	1.63088	0.179703	1.1325e-19
Meta-analysis	BCOR	1.12047	0.157651	1.18352e-12	1.09619	0.0779562	6.53234e-45
Meta-analysis	EHMT2	1.22033	0.17286	1.66897e-12	0.935382	0.0967477	4.11294e-22
Meta-analysis	ZNF282	1.53995	0.219411	2.24154e-12	1.52218	0.169479	2.67138e-19
Meta-analysis	SUZ12	1.25013	0.178206	2.298e-12	1.56885	0.189566	1.27368e-16
Meta-analysis	KDM4B	1.75367	0.25111	2.87523e-12	1.6749	0.198419	3.14123e-17
Meta-analysis	MGA	1.45138	0.208574	3.43685e-12	1.32675	0.148128	3.34351e-19
Meta-analysis	PRDM10	1.56668	0.226344	4.46341e-12	1.2822	0.119472	7.18525e-27
Meta-analysis	EBF1	1.232	0.178119	4.62229e-12	1.11685	0.0867873	6.74776e-38
Meta-analysis	ZBTB7A	1.56558	0.22642	4.6945e-12	1.69502	0.184814	4.66475e-20
Meta-analysis	BRD9	1.47607	0.214445	5.85344e-12	1.28717	0.207273	5.29828e-10
Meta-analysis	CUX1	1.29779	0.189217	6.94677e-12	0.953988	0.0899985	2.97858e-26
Meta-analysis	FIP1L1	1.53813	0.224756	7.72481e-12	1.75781	0.209402	4.68174e-17
Meta-analysis	ZNF143	1.34565	0.198104	1.10119e-11	1.3973	0.167153	6.30372e-17
Meta-analysis	STAT5A	1.3402	0.197442	1.13849e-11	1.19587	0.147916	6.2259e-16
Meta-analysis	BRD4	1.5046	0.224842	2.20436e-11	1.41815	0.243722	5.9305e-09
Meta-analysis	SPI1	1.7042	0.256757	3.19272e-11	1.0166	0.0853509	1.03893e-32
Meta-analysis	KDM1A	1.12276	0.171159	5.38957e-11	1.10411	0.103725	1.848e-26
Meta-analysis	SIN3B	1.59699	0.243622	5.55657e-11	1.69088	0.206706	2.83541e-16
Meta-analysis	REST	1.51193	0.230986	5.9265e-11	1.25671	0.15265	1.83207e-16
Meta-analysis	STAT1	1.59237	0.243627	6.31352e-11	1.62735	0.177818	5.59895e-20
Meta-analysis	USF1	1.54398	0.236722	6.92239e-11	1.24386	0.186499	2.56674e-11
Meta-analysis	POU2F2	1.54511	0.237669	7.97412e-11	1.43996	0.132643	1.86987e-27
Meta-analysis	ZBTB11	1.74388	0.268319	8.06948e-11	1.60899	0.186301	5.79692e-18
Meta-analysis	PHF21A	1.80751	0.278598	8.70622e-11	1.42042	0.201665	1.87527e-12
Meta-analysis	ETV4	1.86965	0.288915	9.71667e-11	1.46889	0.16943	4.3365e-18
Meta-analysis	DNMT1	2.28925	0.354754	1.09617e-10	1.27022	0.211182	1.80097e-09
Meta-analysis	PYGO2	2.15799	0.334562	1.11698e-10	1.22555	0.166086	1.59477e-13
Meta-analysis	E2F6	1.731	0.268595	1.15869e-10	1.70867	0.191401	4.37007e-19
Meta-analysis	IRF2	1.80296	0.286878	3.28364e-10	1.54403	0.182484	2.64674e-17
Meta-analysis	C11orf30	0.935149	0.1506	5.31624e-10	0.755292	0.0895154	3.24014e-17
Meta-analysis	FOXM1	1.50459	0.243018	5.96787e-10	1.19053	0.19944	2.38211e-09
Meta-analysis	CC2D1A	1.1969	0.193786	6.55733e-10	1.13448	0.207988	4.91013e-08
Meta-analysis	TCF7L2	1.42458	0.231049	7.01661e-10	1.30089	0.144891	2.7466e-19
Meta-analysis	SMC3	1.56544	0.255512	8.97398e-10	1.27577	0.157071	4.57736e-16
Meta-analysis	TBP	1.43457	0.234909	1.01569e-09	1.48892	0.165287	2.09622e-19
Meta-analysis	U2AF1	1.53249	0.251127	1.04459e-09	1.58789	0.298843	1.07562e-07
Meta-analysis	CTCF	1.09204	0.178958	1.04614e-09	1.03712	0.136016	2.44064e-14
Meta-analysis	GATAD2A	1.50489	0.251122	2.06416e-09	1.37053	0.159583	8.83169e-18
Meta-analysis	CREB3L1	1.66591	0.278259	2.1389e-09	1.55858	0.186262	5.87687e-17
Meta-analysis	GATA3	1.20003	0.204829	4.66572e-09	0.729557	0.113289	1.19632e-10
Meta-analysis	SKI	1.72868	0.295097	4.68484e-09	1.41165	0.170702	1.34312e-16
Meta-analysis	LEF1	1.38659	0.238799	6.3783e-09	1.27816	0.141087	1.31222e-19
Meta-analysis	USF2	1.62014	0.279792	7.01697e-09	1.42598	0.191139	8.62311e-14
Meta-analysis	CBX3	1.46549	0.254797	8.84143e-09	1.28616	0.140703	6.1903e-20
Meta-analysis	KLF16	1.34108	0.236771	1.47829e-08	1.32608	0.144427	4.24691e-20
Meta-analysis	ELF4	1.21177	0.214404	1.58792e-08	1.30887	0.225356	6.3215e-09
Meta-analysis	NFYB	1.57066	0.278725	1.74893e-08	1.34248	0.169239	2.14914e-15
Meta-analysis	ASH2L	1.29276	0.230682	2.0937e-08	1.46773	0.163617	2.95122e-19
Meta-analysis	TBX3	1.90105	0.342568	2.8666e-08	1.26855	0.157488	7.95277e-16
Meta-analysis	EZH2	1.19248	0.215147	2.9796e-08	1.49335	0.134944	1.82615e-28
Meta-analysis	GMEB1	1.63783	0.295519	2.9869e-08	1.49826	0.15344	1.59959e-22
Meta-analysis	PHF8	1.53346	0.282254	5.54425e-08	1.65101	0.193867	1.64884e-17
Meta-analysis	PAX8	1.89885	0.355111	8.93304e-08	0.809941	0.058455	1.17327e-43
Meta-analysis	SMAD5	1.51266	0.283053	9.08727e-08	1.53513	0.155475	5.40416e-23
Meta-analysis	HMBOX1	1.51963	0.285032	9.74419e-08	0.930663	0.0775192	3.32076e-33
Meta-analysis	SAP30	1.27637	0.240166	1.0694e-07	1.66	0.18045	3.60442e-20
Meta-analysis	NFIB	1.28035	0.241143	1.09926e-07	1.00555	0.133841	5.77783e-14
Meta-analysis	RLF	1.47635	0.278419	1.14157e-07	1.49442	0.238265	3.56248e-10
Meta-analysis	ESR1	1.46147	0.277169	1.34321e-07	1.06184	0.137859	1.33614e-14
Meta-analysis	FOXA2	1.3051	0.248688	1.53822e-07	0.750196	0.099916	5.99151e-14
Meta-analysis	THAP1	1.83925	0.354587	2.137e-07	1.63909	0.388094	2.40614e-05
Meta-analysis	RFX5	1.46478	0.283652	2.41736e-07	1.41506	0.174441	4.98174e-16
Meta-analysis	MAFF	1.20834	0.236969	3.4117e-07	0.644431	0.10734	1.92927e-09
Meta-analysis	TAF7	1.36319	0.268305	3.75987e-07	1.51219	0.271408	2.52301e-08
Meta-analysis	TRIM28	0.949236	0.187466	4.11607e-07	0.971217	0.114515	2.23077e-17
Meta-analysis	PRPF4	1.39811	0.278372	5.10167e-07	1.57795	0.297952	1.18382e-07
Meta-analysis	ZBTB7B	1.44702	0.28968	5.87661e-07	1.20245	0.216164	2.65685e-08
Meta-analysis	HNRNPK	1.02538	0.205362	5.94322e-07	1.12687	0.273183	3.70791e-05
Meta-analysis	SP1	1.43113	0.288143	6.80844e-07	1.18404	0.146507	6.38285e-16
Meta-analysis	ZNF507	2.02949	0.409388	7.14548e-07	1.16711	0.234689	6.59249e-07
Meta-analysis	CHAMP1	1.16959	0.236817	7.86114e-07	0.799686	0.145598	3.96435e-08
Meta-analysis	RAD21	1.45892	0.297171	9.13649e-07	1.14606	0.159743	7.26049e-13
Meta-analysis	PHF20	1.37503	0.286355	1.57204e-06	1.57072	0.186383	3.53498e-17
Meta-analysis	XRCC5	1.47888	0.308268	1.60749e-06	1.57067	0.18138	4.73514e-18
Meta-analysis	HNRNPL	1.72915	0.361248	1.69637e-06	1.62698	0.155682	1.45498e-25
Meta-analysis	ZMYM3	0.877628	0.183419	1.71129e-06	0.88136	0.0451619	8.09602e-85
Meta-analysis	CLOCK	1.15383	0.243616	2.17699e-06	1.47169	0.184388	1.44537e-15
Meta-analysis	HNF1A	1.65336	0.352694	2.76164e-06	1.13593	0.128154	7.73397e-19
Meta-analysis	CCAR2	1.88308	0.409315	4.21366e-06	1.46143	0.29254	5.86375e-07
Meta-analysis	U2AF2	1.88061	0.409529	4.38758e-06	1.43436	0.302961	2.19615e-06
Meta-analysis	FOXA1	1.34957	0.29619	5.20259e-06	0.814213	0.119722	1.03982e-11
Meta-analysis	RXRA	1.44828	0.323647	7.6457e-06	1.12151	0.132604	2.72998e-17
Meta-analysis	TRIM24	1.13343	0.25341	7.72423e-06	1.00718	0.163216	6.79299e-10
Meta-analysis	SRSF4	2.00331	0.448548	7.96132e-06	1.35429	0.204898	3.85416e-11
Meta-analysis	IRF1	1.5162	0.33951	7.97509e-06	1.55985	0.186798	6.79973e-17
Meta-analysis	HNRNPLL	1.56495	0.351373	8.43562e-06	1.73195	0.197733	1.96944e-18
Meta-analysis	RBM39	1.44532	0.330038	1.1908e-05	1.62933	0.175069	1.31779e-20
Meta-analysis	IRF3	1.65188	0.378888	1.3017e-05	1.73773	0.243876	1.03718e-12
Meta-analysis	HNF4A	1.37467	0.320169	1.75822e-05	0.9782	0.123698	2.61686e-15
Meta-analysis	WRNIP1	1.42774	0.334259	1.94292e-05	1.38517	0.181565	2.3642e-14
Meta-analysis	DACH1	1.51497	0.354808	1.95631e-05	1.0943	0.121002	1.51525e-19
Meta-analysis	KDM4A	1.41731	0.335148	2.34837e-05	1.74885	0.194454	2.39157e-19
Meta-analysis	MEF2C	1.3878	0.334251	3.29631e-05	1.23206	0.170882	5.59509e-13
Meta-analysis	BMI1	1.07878	0.261849	3.79103e-05	1.10022	0.103195	1.53976e-26
Meta-analysis	TFAP4	1.72537	0.427747	5.49223e-05	1.4526	0.171324	2.27809e-17
Meta-analysis	ZEB1	1.42812	0.354459	5.60124e-05	1.52048	0.297592	3.23361e-07
Meta-analysis	ZNF316	0.801025	0.20001	6.20396e-05	0.550746	0.0634545	3.97902e-18
Meta-analysis	MYB	2.35706	0.609042	0.000108786	1.48129	0.129886	3.97016e-30
Meta-analysis	ARHGAP35	1.71184	0.448208	0.000133839	1.23959	0.128472	4.97771e-22
Meta-analysis	FOXP1	2.06105	0.541739	0.00014209	0.822436	0.0676205	4.92082e-34
Meta-analysis	MITF	1.20133	0.31719	0.00015223	0.912381	0.173208	1.38252e-07
Meta-analysis	ZBTB8A	3.17472	0.842186	0.000163501	1.18452	0.114773	5.68881e-25
Meta-analysis	CREB1	0.746729	0.199976	0.000188398	0.835891	0.14	2.36299e-09
Meta-analysis	BRCA1	1.61888	0.448105	0.000302994	1.5335	0.24552	4.2133e-10
Meta-analysis	ASH1L	1.26425	0.354497	0.000362023	1.31103	0.2429	6.76112e-08
Meta-analysis	RBM15	3.57808	1.0035	0.000363026	1.79219	0.236062	3.14921e-14
Meta-analysis	ZBTB5	1.34913	0.379037	0.000371742	1.10322	0.102153	3.45289e-27
Meta-analysis	ATF4	0.91619	0.258318	0.000390011	0.708572	0.0719847	7.32171e-23
Meta-analysis	ELK1	1.0717	0.302426	0.000394608	1.5805	0.3089	3.11192e-07
Meta-analysis	SREBF2	1.43449	0.409105	0.000454205	1.58769	0.296523	8.58663e-08
Meta-analysis	ARID2	1.16814	0.334307	0.000475483	1.32824	0.255835	2.08302e-07
Meta-analysis	HNF4G	1.46716	0.420815	0.000489414	1.09089	0.134742	5.6732e-16
Meta-analysis	HNRNPH1	1.71057	0.501079	0.000640682	1.58208	0.266772	3.02096e-09
Meta-analysis	KAT2A	3.39365	1.00747	0.000755776	0.980035	0.324347	0.00251471
Meta-analysis	ZNF574	1.49779	0.448232	0.000833117	1.26151	0.244309	2.42279e-07
Meta-analysis	ZHX1	1.36471	0.409075	0.00084968	1.66847	0.202352	1.64649e-16
Meta-analysis	STAT2	1.60941	0.500854	0.00131201	1.46595	0.197631	1.19219e-13
Meta-analysis	SIX5	1.63	0.509021	0.00136371	1.55449	0.19593	2.12337e-15
Meta-analysis	NUFIP1	1.57095	0.500841	0.001709	1.2977	0.118128	4.48609e-28
Meta-analysis	MAFK	0.761413	0.243909	0.00179806	0.581807	0.09417	6.48094e-10
Meta-analysis	ZKSCAN1	1.36629	0.446227	0.00219953	1.25497	0.251995	6.35313e-07
Meta-analysis	CDC5L	1.37001	0.448172	0.00223649	1.31562	0.166092	2.35533e-15
Meta-analysis	RBM14	1.52369	0.50097	0.00235418	1.67597	0.274268	9.91785e-10
Meta-analysis	CHD1	0.934164	0.310447	0.00262029	1.4007	0.192458	3.38989e-13
Meta-analysis	ZFP91	1.19853	0.398486	0.00263216	1.24305	0.249523	6.30237e-07
Meta-analysis	SREBF1	1.50296	0.50732	0.00305102	1.15766	0.14177	3.19494e-16
Meta-analysis	NFXL1	1.02802	0.354439	0.00372679	1.01024	0.14143	9.12905e-13
Meta-analysis	KAT2B	1.671	0.578316	0.00385946	1.18929	0.218364	5.14026e-08
Meta-analysis	NCOA3	1.09163	0.378956	0.00396903	0.841661	0.106775	3.20655e-15
Meta-analysis	NCOA2	1.27433	0.448043	0.00445217	0.796187	0.0648095	1.09013e-34
Meta-analysis	HSF1	1.63517	0.578667	0.00471698	1.19299	0.0710291	2.61809e-63
Meta-analysis	ZZZ3	1.62619	0.578661	0.00495008	1.04365	0.0753178	1.15962e-43
Meta-analysis	FUS	1.41123	0.504961	0.00519427	1.66873	0.368464	5.92995e-06
Meta-analysis	WHSC1	1.92564	0.708764	0.00658971	0.790115	0.11962	3.96993e-11
Meta-analysis	PCBP2	1.33726	0.501158	0.00762255	0.733536	0.0646508	7.75268e-30
Meta-analysis	UBTF	1.53755	0.578657	0.00788165	1.59705	0.28131	1.36938e-08
Meta-analysis	TRIP13	1.5297	0.578244	0.00815907	0.984837	0.0727279	8.90928e-42
Meta-analysis	NR2C2	1.87113	0.708102	0.00823079	1.4211	0.299351	2.06173e-06
Meta-analysis	PTBP1	1.33299	0.511894	0.00921329	1.56344	0.235465	3.14044e-11
Meta-analysis	DEAF1	1.29969	0.50087	0.00946289	1.52209	0.28677	1.11029e-07
Meta-analysis	THRA	1.83151	0.70866	0.00975307	0.616959	0.123295	5.61752e-07
Meta-analysis	KAT8	1.7441	0.708572	0.0138384	0.803573	0.108602	1.36977e-13
Meta-analysis	MCM2	1.21337	0.500832	0.0154054	0.776774	0.0665478	1.76312e-31
Meta-analysis	E2F7	1.35023	0.578164	0.0195239	1.44493	0.222966	9.14111e-11
Meta-analysis	RBM34	2.32768	1.00147	0.020111	2.1521	0.107925	1.80381e-88
Meta-analysis	IRF5	2.81434	1.21088	0.020114	1.43606	0.145857	7.15261e-23
Meta-analysis	NCOA6	1.56169	0.708295	0.0274643	1.66042	0.0647573	5.36349e-145
Meta-analysis	SAFB	1.10027	0.500862	0.0280382	1.77359	0.21811	4.23528e-16
Meta-analysis	RBBP5	1.2164	0.582133	0.0366572	1.57242	0.293353	8.31442e-08
Meta-analysis	SETDB1	1.03135	0.500779	0.0394481	1.41724	0.273045	2.09716e-07
Meta-analysis	RBM25	0.460993	0.230444	0.0454512	0.772969	0.0713687	2.46419e-27

## Sheet: Supplementary Table 9
Supplementary Table 9. imQTLs with evidence of colocalization (PP4>0.5) with at least one eQTL, showing the gene with the highest posterior probability per imQTL in each tissue.
Tissue	Cell Type	CpG ID	Variant ID	Colon		Lung		Ovary		Prostate		Whole Blood		eQTL Colocalization Statusa
				ENSG IDb	PP4c	ENSG IDb	PP4c	ENSG IDb	PP4c	ENSG IDb	PP4c	ENSG IDb	PP4c	In at least one of the five tissues	Colon	Lung	Ovary	Prostate	Whole Blood
Colon	Endothelial cell	cg16991637	chr1:226137250:G:T	ENSG00000225518.2	0.921739	ENSG00000227496.1	0.226189	ENSG00000243709.1	0.206218	ENSG00000183814.15	0.165829	ENSG00000143751.9	0.214659	TRUE	TRUE	FALSE	FALSE	FALSE	FALSE
Colon	Endothelial cell	cg24851651	chr11:66595526:A:G	ENSG00000172613.7	0.848065	ENSG00000173992.8	0.981559	ENSG00000173992.8	0.934652	ENSG00000173653.7	0.582022	ENSG00000173992.8	0.986855	TRUE	TRUE	TRUE	TRUE	TRUE	TRUE
Colon	Endothelial cell	cg12521152	chr16:71811773:G:C	ENSG00000040199.18	0.878244	ENSG00000040199.18	0.917793	ENSG00000040199.18	0.553172	ENSG00000040199.18	0.888841	ENSG00000040199.18	0.788965	TRUE	TRUE	TRUE	TRUE	TRUE	TRUE
Colon	Epithelial cell	cg07179016	chr1:1130902:A:G	ENSG00000224870.6	0.224789	ENSG00000008130.15	0.169791	ENSG00000142609.17	0.411935	ENSG00000162572.20	0.473813	ENSG00000223823.1	0.604988	TRUE	FALSE	FALSE	FALSE	FALSE	TRUE
Colon	Epithelial cell	cg14659814	chr1:3293359:A:G	ENSG00000238260.1	0.441167	ENSG00000272235.1	0.906748	ENSG00000130764.9	0.181228	ENSG00000116151.13	0.174459	ENSG00000169598.15	0.165952	TRUE	FALSE	TRUE	FALSE	FALSE	FALSE
Colon	Epithelial cell	cg19564590	chr1:8546965:G:A	ENSG00000188807.12	0.335392	ENSG00000269925.1	0.138982	ENSG00000232912.5	0.703082	ENSG00000171621.13	0.787347	ENSG00000074800.13	0.782966	TRUE	FALSE	FALSE	TRUE	TRUE	TRUE
Colon	Epithelial cell	cg20416874	chr1:8546965:G:A	ENSG00000188807.12	0.325075	ENSG00000269925.1	0.133976	ENSG00000232912.5	0.708506	ENSG00000232912.5	0.830258	ENSG00000074800.13	0.688042	TRUE	FALSE	FALSE	TRUE	TRUE	TRUE
Colon	Epithelial cell	cg14193956	chr1:10819511:T:C	ENSG00000198793.12	0.336786	ENSG00000175279.21	0.172613	ENSG00000177674.15	0.149935	ENSG00000175279.21	0.317152	ENSG00000272078.1	0.682563	TRUE	FALSE	FALSE	FALSE	FALSE	TRUE
Colon	Epithelial cell	cg26153784	chr1:10942574:A:G	ENSG00000271895.2	0.372365	ENSG00000132879.13	0.820346	ENSG00000171819.4	0.133984	ENSG00000130940.14	0.2992	ENSG00000009724.16	0.119729	TRUE	FALSE	TRUE	FALSE	FALSE	FALSE
Colon	Epithelial cell	cg04844344	chr1:11071610:C:CCT	ENSG00000171824.13	0.962265	ENSG00000171824.13	0.962864	ENSG00000226849.1	0.688716	ENSG00000009724.16	0.806723	ENSG00000171824.13	0.588117	TRUE	TRUE	TRUE	TRUE	TRUE	TRUE
Colon	Epithelial cell	cg07043613	chr1:11071610:C:CCT	ENSG00000171824.13	0.960901	ENSG00000171824.13	0.961326	ENSG00000226849.1	0.686966	ENSG00000009724.16	0.803842	ENSG00000171824.13	0.584495	TRUE	TRUE	TRUE	TRUE	TRUE	TRUE
Colon	Epithelial cell	cg13390370	chr1:11071610:C:CCT	ENSG00000171824.13	0.962252	ENSG00000171824.13	0.962981	ENSG00000226849.1	0.692197	ENSG00000009724.16	0.806677	ENSG00000171824.13	0.587988	TRUE	TRUE	TRUE	TRUE	TRUE	TRUE
Colon	Epithelial cell	cg01958606	chr1:11798900:T:C	ENSG00000011021.21	0.628616	ENSG00000198793.12	0.54176	ENSG00000177000.10	0.584177	ENSG00000130940.14	0.247968	ENSG00000175206.10	0.418166	TRUE	TRUE	TRUE	TRUE	FALSE	FALSE
Colon	Epithelial cell	cg13216073	chr1:11982204:A:G	ENSG00000116691.10	0.610298	ENSG00000162490.6	0.168336	ENSG00000116685.15	0.354473	ENSG00000120937.8	0.277823	ENSG00000120948.16	0.06838	TRUE	TRUE	FALSE	FALSE	FALSE	FALSE
Colon	Epithelial cell	cg18973939	chr1:15916987:C:T	ENSG00000065526.10	0.186812	ENSG00000186510.11	0.366857	ENSG00000157191.19	0.158256	ENSG00000227959.1	0.209133	ENSG00000065526.10	0.865088	TRUE	FALSE	FALSE	FALSE	FALSE	TRUE
Colon	Epithelial cell	cg06746829	chr1:17102690:A:G	ENSG00000142623.9	0.236542	ENSG00000117115.12	0.338894	ENSG00000117118.9	0.487439	ENSG00000117115.12	0.779861	ENSG00000117115.12	0.201915	TRUE	FALSE	FALSE	FALSE	TRUE	FALSE
Colon	Epithelial cell	cg14356550	chr1:18479350:T:C	ENSG00000179023.8	0.978293	ENSG00000179023.8	0.981258	ENSG00000211454.13	0.26156	ENSG00000159423.16	0.183001	ENSG00000169991.10	0.109472	TRUE	TRUE	TRUE	FALSE	FALSE	FALSE
Colon	Epithelial cell	cg19815009	chr1:25523715:T:C	ENSG00000204178.9	0.734285	ENSG00000188672.17	0.846019	ENSG00000204178.9	0.410078	ENSG00000183726.10	0.244505	ENSG00000175087.9	0.455032	TRUE	TRUE	TRUE	FALSE	FALSE	FALSE
Colon	Epithelial cell	cg10143454	chr1:31510416:C:T	ENSG00000284543.1	0.74251	ENSG00000121775.17	0.624498	ENSG00000229447.2	0.33521	ENSG00000121753.12	0.291415	ENSG00000184007.18	0.331471	TRUE	TRUE	TRUE	FALSE	FALSE	FALSE
Colon	Epithelial cell	cg07862031	chr1:46198577:A:G	ENSG00000085998.13	0.827319	ENSG00000085998.13	0.878871	ENSG00000085998.13	0.742452	ENSG00000186118.8	0.153613	ENSG00000085998.13	0.993221	TRUE	TRUE	TRUE	TRUE	FALSE	TRUE
Colon	Epithelial cell	cg06787764	chr1:46198577:A:G	ENSG00000085998.13	0.827324	ENSG00000085998.13	0.878875	ENSG00000085998.13	0.742458	ENSG00000186118.8	0.153617	ENSG00000085998.13	0.993222	TRUE	TRUE	TRUE	TRUE	FALSE	TRUE
Colon	Epithelial cell	cg20790998	chr1:67829225:A:G	ENSG00000172380.5	0.856787	ENSG00000172380.5	0.961866	ENSG00000232284.7	0.106872	ENSG00000229133.1	0.285373	ENSG00000232284.7	0.0564636	TRUE	TRUE	TRUE	FALSE	FALSE	FALSE
Colon	Epithelial cell	cg02621376	chr1:84995229:C:A	ENSG00000153898.12	0.951372	ENSG00000137941.16	0.202064	ENSG00000153898.12	0.949433	ENSG00000153898.12	0.946629	ENSG00000153898.12	0.308055	TRUE	TRUE	FALSE	TRUE	TRUE	FALSE
Colon	Epithelial cell	cg24809024	chr1:87151258:A:C	ENSG00000137975.7	0.174173	ENSG00000137975.7	0.107832	ENSG00000137975.7	0.587638	ENSG00000143013.12	0.4719	ENSG00000183291.15	0.145533	TRUE	FALSE	FALSE	TRUE	FALSE	FALSE
Colon	Epithelial cell	cg10914949	chr1:87151258:A:C	ENSG00000137975.7	0.174159	ENSG00000137975.7	0.108478	ENSG00000137975.7	0.590041	ENSG00000143013.12	0.470357	ENSG00000183291.15	0.146192	TRUE	FALSE	FALSE	TRUE	FALSE	FALSE
Colon	Epithelial cell	cg12687112	chr1:87151258:A:C	ENSG00000137975.7	0.174147	ENSG00000137975.7	0.108536	ENSG00000137975.7	0.590263	ENSG00000143013.12	0.470182	ENSG00000183291.15	0.146248	TRUE	FALSE	FALSE	TRUE	FALSE	FALSE
Colon	Epithelial cell	cg07389616	chr1:87151258:A:C	ENSG00000137975.7	0.174147	ENSG00000137975.7	0.108535	ENSG00000137975.7	0.590262	ENSG00000143013.12	0.470182	ENSG00000183291.15	0.146248	TRUE	FALSE	FALSE	TRUE	FALSE	FALSE
Colon	Epithelial cell	cg07982651	chr1:94983477:T:C	ENSG00000152078.9	0.130869	ENSG00000226026.5	0.464167	ENSG00000235501.5	0.284779	ENSG00000235501.5	0.465653	ENSG00000235501.5	0.715148	TRUE	FALSE	FALSE	FALSE	FALSE	TRUE
Colon	Epithelial cell	cg23645476	chr1:109740350:G:T	ENSG00000134202.10	0.999986	ENSG00000134202.10	0.974327	ENSG00000134202.10	0.999974	ENSG00000134202.10	0.998006	ENSG00000134202.10	0.999982	TRUE	TRUE	TRUE	TRUE	TRUE	TRUE
Colon	Epithelial cell	cg08525331	chr1:109740350:G:T	ENSG00000134202.10	0.999961	ENSG00000134202.10	0.971126	ENSG00000134202.10	0.999949	ENSG00000134202.10	0.997948	ENSG00000134202.10	0.999957	TRUE	TRUE	TRUE	TRUE	TRUE	TRUE
Colon	Epithelial cell	cg02880629	chr1:109740350:G:T	ENSG00000134202.10	0.99999	ENSG00000134202.10	0.970392	ENSG00000134202.10	0.999978	ENSG00000134202.10	0.997999	ENSG00000134202.10	0.999985	TRUE	TRUE	TRUE	TRUE	TRUE	TRUE
Colon	Epithelial cell	cg24504171	chr1:111565213:G:C	ENSG00000231346.5	0.18022	ENSG00000177272.8	0.57609	ENSG00000273010.1	0.18899	ENSG00000134245.17	0.184231	ENSG00000143079.14	0.167342	TRUE	FALSE	TRUE	FALSE	FALSE	FALSE
Colon	Epithelial cell	cg08477332	chr1:153615732:G:A	ENSG00000189334.8	0.994448	ENSG00000189334.8	0.984834	ENSG00000189171.14	0.826955	ENSG00000203785.8	0.207538	ENSG00000143624.13	0.464197	TRUE	TRUE	TRUE	TRUE	FALSE	FALSE
Colon	Epithelial cell	cg26148377	chr1:153633818:AC:A	ENSG00000160679.12	0.974778	ENSG00000272030.1	0.974964	ENSG00000272030.1	0.975857	ENSG00000272030.1	0.974966	ENSG00000160678.11	0.970244	TRUE	TRUE	TRUE	TRUE	TRUE	TRUE
Colon	Epithelial cell	cg26548293	chr1:153633818:AC:A	ENSG00000272030.1	0.97821	ENSG00000272030.1	0.986955	ENSG00000272030.1	0.97094	ENSG00000272030.1	0.986956	ENSG00000160678.11	0.982466	TRUE	TRUE	TRUE	TRUE	TRUE	TRUE
Colon	Epithelial cell	cg27397230	chr1:154431860:C:T	ENSG00000160712.12	0.766949	ENSG00000143543.14	0.305413	ENSG00000163348.3	0.353347	ENSG00000143543.14	0.285186	ENSG00000160712.12	0.957782	TRUE	TRUE	FALSE	FALSE	FALSE	TRUE
Colon	Epithelial cell	cg13572380	chr1:154731249:G:A	ENSG00000235919.4	0.533349	ENSG00000169291.9	0.3494	ENSG00000143630.9	0.19696	ENSG00000143537.13	0.434324	ENSG00000143569.18	0.861457	TRUE	TRUE	FALSE	FALSE	FALSE	TRUE
Colon	Epithelial cell	cg07923656	chr1:155109464:T:C	ENSG00000143590.13	0.871313	ENSG00000160753.15	0.523219	ENSG00000231064.7	0.495048	ENSG00000163479.13	0.53979	ENSG00000169242.11	0.392606	TRUE	TRUE	TRUE	FALSE	TRUE	FALSE
Colon	Epithelial cell	cg05046020	chr1:158180266:C:T	ENSG00000158473.6	0.26393	ENSG00000158481.12	0.295347	ENSG00000158481.12	0.110882	ENSG00000143297.18	0.203303	ENSG00000163565.18	0.506053	TRUE	FALSE	FALSE	FALSE	FALSE	TRUE
Colon	Epithelial cell	cg17003250	chr1:171342216:T:G	ENSG00000117533.14	0.19382	ENSG00000076258.9	0.936051	ENSG00000208024.1	0.293619	ENSG00000076258.9	0.915571	ENSG00000233328.3	0.142926	TRUE	FALSE	TRUE	FALSE	TRUE	FALSE
Colon	Epithelial cell	cg11827190	chr1:180517145:G:A	ENSG00000229407.5	0.535118	ENSG00000260360.1	0.376643	ENSG00000143340.6	0.150402	ENSG00000227141.2	0.123981	ENSG00000162783.10	0.274067	TRUE	TRUE	FALSE	FALSE	FALSE	FALSE
Colon	Epithelial cell	cg18856995	chr1:183727105:C:A	ENSG00000116701.14	0.733688	ENSG00000058085.14	0.152147	ENSG00000162704.15	0.170246	ENSG00000143344.15	0.265777	ENSG00000143333.6	0.162918	TRUE	TRUE	FALSE	FALSE	FALSE	FALSE
Colon	Epithelial cell	cg11145461	chr1:201505513:CT:C	ENSG00000223396.2	0.981925	ENSG00000223396.2	0.981659	ENSG00000224536.2	0.591049	ENSG00000223396.2	0.854231	ENSG00000224536.2	0.501368	TRUE	TRUE	TRUE	TRUE	TRUE	TRUE
Colon	Epithelial cell	cg16530596	chr1:205258632:G:C	ENSG00000133059.16	0.934977	ENSG00000133059.16	0.805205	ENSG00000174529.7	0.573442	ENSG00000174529.7	0.531285	ENSG00000133069.15	0.82198	TRUE	TRUE	TRUE	TRUE	TRUE	TRUE
Colon	Epithelial cell	cg27004073	chr1:207890463:G:A	ENSG00000174059.16	0.268993	ENSG00000117335.19	0.344512	ENSG00000123838.10	0.562308	ENSG00000076356.6	0.59303	ENSG00000203710.10	0.525724	TRUE	FALSE	FALSE	TRUE	TRUE	TRUE
Colon	Epithelial cell	cg20616937	chr20:25332462:G:GACATCTAC	ENSG00000101003.9	0.88774	ENSG00000125804.13	0.443819	ENSG00000277938.1	0.821755	ENSG00000100997.18	0.835449	ENSG00000077984.5	0.908819	TRUE	TRUE	FALSE	TRUE	TRUE	TRUE
Colon	Epithelial cell	cg16187739	chr20:37331411:T:C	ENSG00000101347.8	0.238659	ENSG00000101363.12	0.690663	ENSG00000197122.11	0.707604	ENSG00000101363.12	0.303088	ENSG00000149639.14	0.362045	TRUE	FALSE	TRUE	TRUE	FALSE	FALSE
Colon	Epithelial cell	cg22625504	chr20:37992450:T:C	ENSG00000101407.12	0.258323	ENSG00000132821.11	0.982484	ENSG00000101407.12	0.802729	ENSG00000101407.12	0.820294	ENSG00000101407.12	0.386703	TRUE	FALSE	TRUE	TRUE	TRUE	FALSE
Colon	Epithelial cell	cg25241888	chr20:37992450:T:C	ENSG00000101407.12	0.253327	ENSG00000132821.11	0.98213	ENSG00000101407.12	0.807848	ENSG00000101407.12	0.81619	ENSG00000101407.12	0.390809	TRUE	FALSE	TRUE	TRUE	TRUE	FALSE
Colon	Epithelial cell	cg27176129	chr20:45274306:T:A	ENSG00000100985.7	0.590852	ENSG00000182931.9	0.481806	ENSG00000196839.12	0.623161	ENSG00000100979.14	0.311036	ENSG00000124233.11	0.512407	TRUE	TRUE	FALSE	TRUE	FALSE	TRUE
Colon	Epithelial cell	cg04305670	chr20:45308350:A:AGGGGAAGT	ENSG00000100985.7	0.668292	ENSG00000226812.2	0.425417	ENSG00000196839.12	0.631323	ENSG00000100979.14	0.304019	ENSG00000124120.10	0.177746	TRUE	TRUE	FALSE	TRUE	FALSE	FALSE
Colon	Epithelial cell	cg21394589	chr20:45427440:C:CGTG	ENSG00000226243.1	0.13072	ENSG00000124155.17	0.685657	ENSG00000277022.1	0.583753	ENSG00000101473.16	0.332487	ENSG00000124120.10	0.58623	TRUE	FALSE	TRUE	TRUE	FALSE	TRUE
Colon	Epithelial cell	cg10580960	chr20:50644261:T:C	ENSG00000197818.11	0.410485	ENSG00000233077.1	0.19515	ENSG00000042062.11	0.257183	ENSG00000124171.8	0.161088	ENSG00000158470.5	0.750291	TRUE	FALSE	FALSE	FALSE	FALSE	TRUE
Colon	Epithelial cell	cg15159602	chr20:50824544:G:C	ENSG00000279835.1	0.554117	ENSG00000196396.9	0.131046	ENSG00000237788.1	0.392314	ENSG00000237788.1	0.199293	ENSG00000124243.17	0.816011	TRUE	TRUE	FALSE	FALSE	FALSE	TRUE
Colon	Epithelial cell	cg04815707	chr20:62601399:C:T	ENSG00000101199.12	0.395234	ENSG00000130699.18	0.302544	ENSG00000174403.15	0.171609	ENSG00000130700.6	0.514072	ENSG00000277496.1	0.303117	TRUE	FALSE	FALSE	FALSE	TRUE	FALSE
Colon	Epithelial cell	cg10512781	chr20:64064525:C:A	ENSG00000171700.13	0.969997	ENSG00000171700.13	0.979886	ENSG00000125510.15	0.930214	ENSG00000171700.13	0.949519	ENSG00000125510.15	0.994375	TRUE	TRUE	TRUE	TRUE	TRUE	TRUE
Colon	Epithelial cell	cg19894312	chr21:34203496:A:G	ENSG00000243927.5	0.902311	ENSG00000159200.17	0.632334	ENSG00000234380.1	0.315263	ENSG00000142188.16	0.192117	ENSG00000159147.17	0.130518	TRUE	TRUE	TRUE	FALSE	FALSE	FALSE
Colon	Epithelial cell	cg25099965	chr21:38795138:T:G	ENSG00000157554.18	0.456289	ENSG00000183778.17	0.568663	ENSG00000223806.7	0.21353	ENSG00000157557.11	0.333534	ENSG00000205581.10	0.237388	TRUE	FALSE	TRUE	FALSE	FALSE	FALSE
Colon	Epithelial cell	cg04000056	chr21:42584143:T:C	ENSG00000160201.11	0.146243	ENSG00000225431.1	0.585171	ENSG00000160193.11	0.218356	ENSG00000225431.1	0.201137	ENSG00000173276.13	0.15082	TRUE	FALSE	TRUE	FALSE	FALSE	FALSE
Colon	Epithelial cell	cg16544704	chr21:42616819:C:T	ENSG00000160180.15	0.554816	ENSG00000237232.7	0.127021	ENSG00000157617.16	0.130276	ENSG00000237232.7	0.397386	ENSG00000173276.13	0.153048	TRUE	TRUE	FALSE	FALSE	FALSE	FALSE
Colon	Epithelial cell	cg01074392	chr21:42616819:C:T	ENSG00000160180.15	0.5548	ENSG00000237232.7	0.127017	ENSG00000157617.16	0.130275	ENSG00000237232.7	0.397377	ENSG00000173276.13	0.15304	TRUE	TRUE	FALSE	FALSE	FALSE	FALSE
Colon	Epithelial cell	cg03885509	chr21:42616819:C:T	ENSG00000160180.15	0.554816	ENSG00000237232.7	0.127021	ENSG00000157617.16	0.130276	ENSG00000237232.7	0.397386	ENSG00000173276.13	0.153048	TRUE	TRUE	FALSE	FALSE	FALSE	FALSE
Colon	Epithelial cell	cg14719752	chr21:42616819:C:T	ENSG00000160180.15	0.554816	ENSG00000237232.7	0.127021	ENSG00000157617.16	0.130276	ENSG00000237232.7	0.397386	ENSG00000173276.13	0.153048	TRUE	TRUE	FALSE	FALSE	FALSE	FALSE
Colon	Epithelial cell	cg15363607	chr22:24599077:G:A	ENSG00000178026.12	0.973286	ENSG00000284070.1	0.314231	ENSG00000284128.1	0.558218	ENSG00000100031.18	0.952115	ENSG00000100031.18	0.896875	TRUE	TRUE	FALSE	TRUE	TRUE	TRUE
Colon	Epithelial cell	cg00524659	chr22:42901674:C:T	ENSG00000242247.10	0.768933	ENSG00000242247.10	0.909408	ENSG00000274717.1	0.797319	ENSG00000242247.10	0.802446	ENSG00000242247.10	0.912061	TRUE	TRUE	TRUE	TRUE	TRUE	TRUE
Colon	Epithelial cell	cg05296841	chr22:42883276:A:G	ENSG00000242247.10	0.776554	ENSG00000242247.10	0.779131	ENSG00000274717.1	0.776982	ENSG00000242247.10	0.778618	ENSG00000242247.10	0.896472	TRUE	TRUE	TRUE	TRUE	TRUE	TRUE
Colon	Lymphocyte	cg19815009	chr1:25523451:C:T	ENSG00000204178.9	0.705428	ENSG00000188672.17	0.816358	ENSG00000204178.9	0.430642	ENSG00000183726.10	0.233172	ENSG00000175087.9	0.445598	TRUE	TRUE	TRUE	FALSE	FALSE	FALSE
Colon	Lymphocyte	cg02621376	chr1:84998055:C:A	ENSG00000153898.12	0.977201	ENSG00000137941.16	0.199041	ENSG00000153898.12	0.958459	ENSG00000153898.12	0.974878	ENSG00000153898.12	0.252708	TRUE	TRUE	FALSE	TRUE	TRUE	FALSE
Colon	Lymphocyte	cg24504171	chr1:111566045:A:C	ENSG00000231346.5	0.197911	ENSG00000177272.8	0.550077	ENSG00000273010.1	0.186079	ENSG00000134245.17	0.212968	ENSG00000143079.14	0.188141	TRUE	FALSE	TRUE	FALSE	FALSE	FALSE
Colon	Lymphocyte	cg16530596	chr1:205258632:G:C	ENSG00000133059.16	0.921063	ENSG00000133059.16	0.766448	ENSG00000174529.7	0.558603	ENSG00000133059.16	0.510244	ENSG00000133069.15	0.837725	TRUE	TRUE	TRUE	TRUE	TRUE	TRUE
Colon	Lymphocyte	cg23541422	chr2:8571639:T:C	ENSG00000231435.1	0.274024	ENSG00000236008.1	0.221514	ENSG00000236790.5	0.16405	ENSG00000231435.1	0.66783	ENSG00000231435.1	0.179431	TRUE	FALSE	FALSE	FALSE	TRUE	FALSE
Colon	Lymphocyte	cg16040230	chr2:201160898:A:G	ENSG00000155744.9	0.571505	ENSG00000003400.14	0.936275	ENSG00000003393.14	0.239027	ENSG00000003400.14	0.91801	ENSG00000116030.16	0.266913	TRUE	TRUE	TRUE	FALSE	TRUE	FALSE
Colon	Lymphocyte	cg10458446	chr2:237592733:G:C	ENSG00000234949.2	0.999382	ENSG00000198612.10	0.425329	ENSG00000283635.1	0.582024	ENSG00000232306.2	0.499205	ENSG00000124839.12	0.985697	TRUE	TRUE	FALSE	TRUE	FALSE	TRUE
Colon	Lymphocyte	cg02037349	chr3:49853180:C:T	ENSG00000164068.15	0.914446	ENSG00000164068.15	0.924724	ENSG00000164068.15	0.919385	ENSG00000164068.15	0.924439	ENSG00000182179.12	0.880855	TRUE	TRUE	TRUE	TRUE	TRUE	TRUE
Colon	Lymphocyte	cg05867326	chr3:190323165:G:T	ENSG00000225764.1	0.0777669	ENSG00000163347.5	0.994247	ENSG00000113946.3	0.495944	ENSG00000113946.3	0.972575	ENSG00000231047.1	0.0588839	TRUE	FALSE	TRUE	FALSE	TRUE	FALSE
Colon	Lymphocyte	cg14617041	chr5:73118856:G:GTAATAAA	ENSG00000157111.12	0.99989	ENSG00000164338.9	0.123367	ENSG00000272081.1	0.283358	ENSG00000271926.1	0.197764	ENSG00000145741.15	0.102415	TRUE	TRUE	FALSE	FALSE	FALSE	FALSE
Colon	Lymphocyte	cg15518950	chr5:73118856:G:GTAATAAA	ENSG00000157111.12	0.999899	ENSG00000164338.9	0.123498	ENSG00000272081.1	0.285865	ENSG00000271926.1	0.196715	ENSG00000145741.15	0.102212	TRUE	TRUE	FALSE	FALSE	FALSE	FALSE
Colon	Lymphocyte	cg22775635	chr6:6851305:A:G	ENSG00000168566.12	0.705774	ENSG00000168566.12	0.246503	ENSG00000261211.1	0.20623	ENSG00000112799.8	0.424506	ENSG00000124782.19	0.203494	TRUE	TRUE	FALSE	FALSE	FALSE	FALSE
Colon	Lymphocyte	cg02683197	chr6:28107147:C:A	ENSG00000219392.1	0.872098	ENSG00000219392.1	0.897938	ENSG00000219392.1	0.887455	ENSG00000219392.1	0.890566	ENSG00000269293.2	0.855356	TRUE	TRUE	TRUE	TRUE	TRUE	TRUE
Colon	Lymphocyte	cg06470822	chr6:28107147:C:A	ENSG00000219392.1	0.870001	ENSG00000219392.1	0.895406	ENSG00000219392.1	0.885699	ENSG00000219392.1	0.887516	ENSG00000269293.2	0.853112	TRUE	TRUE	TRUE	TRUE	TRUE	TRUE
Colon	Lymphocyte	cg03111404	chr6:28192182:T:C	ENSG00000226314.7	0.878148	ENSG00000219392.1	0.874335	ENSG00000220721.1	0.876803	ENSG00000219392.1	0.867944	ENSG00000269293.2	0.832903	TRUE	TRUE	TRUE	TRUE	TRUE	TRUE
Colon	Lymphocyte	cg02196503	chr6:28756302:T:G	ENSG00000281831.1	0.96631	ENSG00000281831.1	0.986231	ENSG00000187987.9	0.61841	ENSG00000235109.7	0.830294	ENSG00000206503.12	0.447644	TRUE	TRUE	TRUE	TRUE	TRUE	FALSE
Colon	Lymphocyte	cg23313031	chr6:30049033:A:T	ENSG00000237669.1	0.857233	ENSG00000237669.1	0.839364	ENSG00000237669.1	0.853568	ENSG00000237669.1	0.850616	ENSG00000204618.8	0.445463	TRUE	TRUE	TRUE	TRUE	TRUE	FALSE
Colon	Lymphocyte	cg19448822	chr6:29941937:T:C	ENSG00000237669.1	0.86951	ENSG00000204540.10	0.860571	ENSG00000237669.1	0.866004	ENSG00000237669.1	0.860847	ENSG00000204618.8	0.404375	TRUE	TRUE	TRUE	TRUE	TRUE	FALSE
Colon	Lymphocyte	cg14159011	chr6:36388225:A:G	ENSG00000010030.13	0.995515	ENSG00000010030.13	0.241557	ENSG00000146192.14	0.150947	ENSG00000010030.13	0.979543	ENSG00000255587.7	0.476576	TRUE	TRUE	FALSE	FALSE	TRUE	FALSE
Colon	Lymphocyte	cg12709746	chr6:109304593:T:C	ENSG00000112365.4	0.284085	ENSG00000112290.12	0.603393	ENSG00000155085.15	0.153703	ENSG00000203801.8	0.12396	ENSG00000203801.8	0.241273	TRUE	FALSE	TRUE	FALSE	FALSE	FALSE
Colon	Lymphocyte	cg22535104	chr7:75676776:CA:C	ENSG00000146707.14	0.195622	ENSG00000127952.16	0.12108	ENSG00000127946.16	0.282603	ENSG00000214243.3	0.544303	ENSG00000274523.4	0.543954	TRUE	FALSE	FALSE	FALSE	TRUE	TRUE
Colon	Lymphocyte	cg20364044	chr7:101562422:G:A	ENSG00000168255.19	0.252915	ENSG00000128581.15	0.256117	ENSG00000161036.12	0.672485	ENSG00000236305.1	0.278899	ENSG00000233297.4	0.24667	TRUE	FALSE	FALSE	TRUE	FALSE	FALSE
Colon	Lymphocyte	cg17279839	chr7:150340838:C:T	ENSG00000261305.1	0.954329	ENSG00000214022.11	0.437608	ENSG00000127399.14	0.846862	ENSG00000261305.1	0.993403	ENSG00000261305.1	0.564366	TRUE	TRUE	FALSE	TRUE	TRUE	TRUE
Colon	Lymphocyte	cg11885975	chr7:155962079:T:C	ENSG00000204876.4	0.904638	ENSG00000164690.7	0.299263	ENSG00000186480.12	0.525481	ENSG00000273117.1	0.134214	ENSG00000157212.18	0.717163	TRUE	TRUE	FALSE	TRUE	FALSE	TRUE
Colon	Lymphocyte	cg01002857	chr8:11862718:G:C	ENSG00000154328.15	0.329962	ENSG00000164733.20	0.239288	ENSG00000254936.4	0.211892	ENSG00000227203.3	0.440924	ENSG00000164733.20	1	TRUE	FALSE	FALSE	FALSE	FALSE	TRUE
Colon	Lymphocyte	cg09087222	chr8:11862718:G:C	ENSG00000154328.15	0.329962	ENSG00000164733.20	0.239287	ENSG00000254936.4	0.211892	ENSG00000227203.3	0.440924	ENSG00000164733.20	1	TRUE	FALSE	FALSE	FALSE	FALSE	TRUE
Colon	Lymphocyte	cg10933148	chr8:80095704:G:T	ENSG00000164684.13	0.28292	ENSG00000188856.6	0.143469	ENSG00000205189.11	0.142659	ENSG00000164683.16	0.103213	ENSG00000260317.1	0.519876	TRUE	FALSE	FALSE	FALSE	FALSE	TRUE
Colon	Lymphocyte	cg16675872	chr8:129241197:G:C	ENSG00000153310.19	0.794612	ENSG00000254317.1	0.0413843	ENSG00000254317.1	0.132232	ENSG00000254317.1	0.101814	ENSG00000254317.1	0.0555382	TRUE	TRUE	FALSE	FALSE	FALSE	FALSE
Colon	Lymphocyte	cg04327959	chr9:38089972:C:T	ENSG00000107338.9	0.411487	ENSG00000107338.9	0.239787	ENSG00000107338.9	0.808687	ENSG00000283162.1	0.537863	ENSG00000180071.19	0.093396	TRUE	FALSE	FALSE	TRUE	TRUE	FALSE
Colon	Lymphocyte	cg24007924	chr9:95782396:C:T	ENSG00000268926.2	0.378123	ENSG00000130956.13	0.127847	ENSG00000268926.2	0.325178	ENSG00000268926.2	0.624335	ENSG00000271659.1	0.242492	TRUE	FALSE	FALSE	FALSE	TRUE	FALSE
Colon	Lymphocyte	cg09075096	chr10:32352016:A:G	ENSG00000227253.3	0.828113	ENSG00000234335.1	0.11296	ENSG00000217094.2	0.109682	ENSG00000238258.1	0.292229	ENSG00000233387.1	0.11002	TRUE	TRUE	FALSE	FALSE	FALSE	FALSE
Colon	Lymphocyte	cg08583969	chr10:34966173:A:G	ENSG00000271335.5	0.361618	ENSG00000271335.5	0.829783	ENSG00000271335.5	0.238216	ENSG00000271335.5	0.897153	ENSG00000271335.5	0.46371	TRUE	FALSE	TRUE	FALSE	TRUE	FALSE
Colon	Lymphocyte	cg22380090	chr10:59678952:T:C	ENSG00000165443.11	0.0682564	ENSG00000232682.2	0.0564482	ENSG00000165449.11	0.732995	ENSG00000232682.2	0.174754	ENSG00000151150.21	0.00231774	TRUE	FALSE	FALSE	TRUE	FALSE	FALSE
Colon	Lymphocyte	cg11932029	chr10:71514139:C:T	ENSG00000148719.14	0.242164	ENSG00000148719.14	0.377053	ENSG00000107738.19	0.197747	ENSG00000107736.19	0.983864	ENSG00000198246.7	0.202402	TRUE	FALSE	FALSE	FALSE	TRUE	FALSE
Colon	Lymphocyte	cg24023723	chr11:45272601:A:G	ENSG00000175274.18	0.553379	ENSG00000019505.7	0.479961	ENSG00000135365.15	0.167316	ENSG00000019505.7	0.887603	ENSG00000175264.7	0.60604	TRUE	TRUE	FALSE	FALSE	TRUE	TRUE
Colon	Lymphocyte	cg20160996	chr11:64148065:G:A	ENSG00000149761.8	0.75125	ENSG00000173113.6	0.894654	ENSG00000168065.15	0.38282	ENSG00000149743.13	0.247136	ENSG00000110011.13	0.838611	TRUE	TRUE	TRUE	FALSE	FALSE	TRUE
Colon	Lymphocyte	cg02274284	chr12:106988017:AAAACTGGTT:A	ENSG00000136045.11	0.355102	ENSG00000136045.11	0.672201	ENSG00000111785.19	0.176024	ENSG00000151135.9	0.106925	ENSG00000166046.10	0.190656	TRUE	FALSE	TRUE	FALSE	FALSE	FALSE
Colon	Lymphocyte	cg10330313	chr12:110156465:T:G	ENSG00000278993.1	0.893295	ENSG00000111229.15	0.93474	ENSG00000139433.9	0.21887	ENSG00000278993.1	0.471712	ENSG00000278993.1	0.980468	TRUE	TRUE	TRUE	FALSE	FALSE	TRUE
Colon	Lymphocyte	cg05335186	chr13:52551342:G:A	ENSG00000139675.11	0.999176	ENSG00000250299.5	0.975694	ENSG00000139675.11	0.885905	ENSG00000139675.11	0.819149	ENSG00000165416.14	0.722509	TRUE	TRUE	TRUE	TRUE	TRUE	TRUE
Colon	Lymphocyte	cg12458913	chr13:52551342:G:A	ENSG00000139675.11	0.999867	ENSG00000250299.5	0.984415	ENSG00000139675.11	0.881809	ENSG00000139675.11	0.737966	ENSG00000139675.11	0.369804	TRUE	TRUE	TRUE	TRUE	TRUE	FALSE
Colon	Lymphocyte	cg12581627	chr13:61403216:A:G	ENSG00000280165.1	0.996411	ENSG00000280165.1	0.829895	ENSG00000280165.1	0.0513969	ENSG00000280165.1	0.24036	ENSG00000083544.13	0.00638503	TRUE	TRUE	TRUE	FALSE	FALSE	FALSE
Colon	Lymphocyte	cg18593517	chr14:68386866:G:A	ENSG00000259038.1	0.163776	ENSG00000198133.8	0.74214	ENSG00000198133.8	0.281157	ENSG00000258623.1	0.342268	ENSG00000072042.12	0.552421	TRUE	FALSE	TRUE	FALSE	FALSE	TRUE
Colon	Lymphocyte	cg12488301	chr14:77051443:G:A	ENSG00000100593.17	0.113657	ENSG00000119669.4	0.700465	ENSG00000100565.15	0.677987	ENSG00000246548.3	0.113982	ENSG00000119669.4	0.994821	TRUE	FALSE	TRUE	TRUE	FALSE	TRUE
Colon	Lymphocyte	cg05884705	chr15:40308855:GCTCTCCT:G	ENSG00000137841.11	0.872609	ENSG00000137843.11	0.419566	ENSG00000276107.1	0.204602	ENSG00000279537.1	0.189722	ENSG00000137841.11	0.86237	TRUE	TRUE	FALSE	FALSE	FALSE	TRUE
Colon	Lymphocyte	cg05547778	chr15:40308855:GCTCTCCT:G	ENSG00000137841.11	0.846287	ENSG00000137843.11	0.421375	ENSG00000276107.1	0.206196	ENSG00000279537.1	0.188529	ENSG00000261136.1	0.377593	TRUE	TRUE	FALSE	FALSE	FALSE	FALSE
Colon	Lymphocyte	cg14076977	chr15:40308855:GCTCTCCT:G	ENSG00000137841.11	0.846286	ENSG00000137843.11	0.421375	ENSG00000276107.1	0.206196	ENSG00000279537.1	0.188529	ENSG00000261136.1	0.377593	TRUE	TRUE	FALSE	FALSE	FALSE	FALSE
Colon	Lymphocyte	cg21931938	chr15:40308855:GCTCTCCT:G	ENSG00000137841.11	0.84743	ENSG00000137843.11	0.421387	ENSG00000276107.1	0.206172	ENSG00000279537.1	0.188589	ENSG00000261136.1	0.377568	TRUE	TRUE	FALSE	FALSE	FALSE	FALSE
Colon	Lymphocyte	cg18814616	chr15:42212978:C:T	ENSG00000278769.1	0.309234	ENSG00000159433.11	0.913638	ENSG00000137822.12	0.616142	ENSG00000092529.23	0.612813	ENSG00000214013.9	0.926198	TRUE	FALSE	TRUE	TRUE	TRUE	TRUE
Colon	Lymphocyte	cg22576950	chr15:68230512:G:A	ENSG00000128973.12	0.919494	ENSG00000033800.13	0.514454	ENSG00000128973.12	0.215002	ENSG00000212766.9	0.66477	ENSG00000129007.14	0.910184	TRUE	TRUE	TRUE	FALSE	TRUE	TRUE
Colon	Lymphocyte	cg23020028	chr15:78181067:G:GT	ENSG00000166411.13	0.549813	ENSG00000188266.13	0.253772	ENSG00000103740.9	0.478387	ENSG00000260139.6	0.239159	ENSG00000166411.13	0.0901775	TRUE	TRUE	FALSE	FALSE	FALSE	FALSE
Colon	Lymphocyte	cg16035236	chr15:93091704:C:T	ENSG00000253954.3	0.596552	ENSG00000274215.1	0.066176	ENSG00000260361.1	0.248064	ENSG00000258676.4	0.182298	ENSG00000182175.13	0.31248	TRUE	TRUE	FALSE	FALSE	FALSE	FALSE
Colon	Lymphocyte	cg25738319	chr16:67955620:T:C	ENSG00000213398.7	0.810075	ENSG00000159714.10	0.825774	ENSG00000132600.16	0.660007	ENSG00000213398.7	0.461532	ENSG00000159720.11	0.968796	TRUE	TRUE	TRUE	TRUE	FALSE	TRUE
Colon	Lymphocyte	cg14172705	chr16:80319372:C:A	ENSG00000166454.9	0.854125	ENSG00000260495.1	0.195616	ENSG00000166473.17	0.176327	ENSG00000178573.6	0.397734	ENSG00000103121.8	0.607948	TRUE	TRUE	FALSE	FALSE	FALSE	TRUE
Colon	Lymphocyte	cg04694209	chr16:89158755:G:A	ENSG00000180422.3	0.63427	ENSG00000180422.3	0.981724	ENSG00000180422.3	0.969406	ENSG00000180422.3	0.920703	ENSG00000141002.19	0.59691	TRUE	TRUE	TRUE	TRUE	TRUE	TRUE
Colon	Lymphocyte	cg12324119	chr17:81097165:C:G	ENSG00000169710.8	0.362372	ENSG00000175866.15	0.769924	ENSG00000266074.8	0.195353	ENSG00000197063.10	0.205637	ENSG00000280351.2	0.506389	TRUE	FALSE	TRUE	FALSE	FALSE	TRUE
Colon	Lymphocyte	cg05580415	chr17:82596100:A:AGGCCACACCTGC	ENSG00000141568.20	0.70557	ENSG00000182446.13	0.340484	ENSG00000141580.15	0.562907	ENSG00000141580.15	0.963213	ENSG00000265692.1	0.278394	TRUE	TRUE	FALSE	TRUE	TRUE	FALSE
Colon	Lymphocyte	cg16375265	chr17:82596100:A:AGGCCACACCTGC	ENSG00000141568.20	0.723642	ENSG00000182446.13	0.360893	ENSG00000141580.15	0.563335	ENSG00000141580.15	0.956189	ENSG00000265692.1	0.273354	TRUE	TRUE	FALSE	TRUE	TRUE	FALSE
Colon	Lymphocyte	cg08814944	chr18:13235176:G:A	ENSG00000267108.1	0.179118	ENSG00000101624.10	0.525487	ENSG00000186481.16	0.163048	ENSG00000085415.15	0.633089	ENSG00000260302.1	0.409714	TRUE	FALSE	TRUE	FALSE	TRUE	FALSE
Colon	Lymphocyte	cg09779027	chr19:7224339:C:T	ENSG00000267939.1	0.515424	ENSG00000125657.4	0.326948	ENSG00000125650.4	0.255085	ENSG00000104921.14	0.933101	ENSG00000125726.10	0.354851	TRUE	TRUE	FALSE	FALSE	TRUE	FALSE
Colon	Lymphocyte	cg00428638	chr19:7222028:C:CAA	ENSG00000267939.1	0.511822	ENSG00000125657.4	0.325132	ENSG00000125650.4	0.255217	ENSG00000104921.14	0.933887	ENSG00000125726.10	0.354565	TRUE	TRUE	FALSE	FALSE	TRUE	FALSE
Colon	Lymphocyte	cg00524659	chr22:42810222:G:C	ENSG00000242247.10	0.78767	ENSG00000242247.10	0.931675	ENSG00000274717.1	0.800999	ENSG00000242247.10	0.804528	ENSG00000242247.10	0.919359	TRUE	TRUE	TRUE	TRUE	TRUE	TRUE
Colon	Myeloid cell	cg22720392	chr1:3109282:T:A	ENSG00000158109.14	0.30668	ENSG00000157916.19	0.593106	ENSG00000142611.16	0.14366	ENSG00000272449.1	0.549813	ENSG00000116151.13	0.272749	TRUE	FALSE	TRUE	FALSE	TRUE	FALSE
Colon	Myeloid cell	cg05968400	chr1:53916710:C:T	ENSG00000081870.11	0.955334	ENSG00000081870.11	0.610753	ENSG00000280378.1	0.229782	ENSG00000081870.11	0.633769	ENSG00000081870.11	0.186724	TRUE	TRUE	TRUE	FALSE	TRUE	FALSE
Colon	Myeloid cell	cg12617456	chr1:84779381:C:T	ENSG00000153904.18	0.142617	ENSG00000162642.13	0.809491	ENSG00000162643.12	0.331614	ENSG00000272691.1	0.160937	ENSG00000055732.12	0.111612	TRUE	FALSE	TRUE	FALSE	FALSE	FALSE
Colon	Myeloid cell	cg16991637	chr1:226110298:T:C	ENSG00000225518.2	0.911945	ENSG00000227496.1	0.174839	ENSG00000243709.1	0.193691	ENSG00000183814.15	0.161023	ENSG00000143751.9	0.20529	TRUE	TRUE	FALSE	FALSE	FALSE	FALSE
Colon	Myeloid cell	cg18477163	chr1:228211422:A:C	ENSG00000162913.9	0.959834	ENSG00000162913.9	0.974611	ENSG00000162913.9	0.926899	ENSG00000162913.9	0.966771	ENSG00000162913.9	0.899663	TRUE	TRUE	TRUE	TRUE	TRUE	TRUE
Colon	Myeloid cell	cg13388618	chr2:237906181:A:C	ENSG00000132326.11	0.298515	ENSG00000132329.10	0.978648	ENSG00000132329.10	0.328818	ENSG00000186235.10	0.212043	ENSG00000132329.10	0.85833	TRUE	FALSE	TRUE	FALSE	FALSE	TRUE
Colon	Myeloid cell	cg13206224	chr4:169017295:G:A	ENSG00000145439.11	0.549418	ENSG00000181381.13	0.0913932	ENSG00000145439.11	0.158321	ENSG00000154447.14	0.657443	ENSG00000145439.11	0.523961	TRUE	TRUE	FALSE	FALSE	TRUE	TRUE
Colon	Myeloid cell	cg21907309	chr6:54086067:G:A	ENSG00000146147.14	0.988513	ENSG00000146147.14	0.294138	ENSG00000124743.5	0.120937	ENSG00000137270.10	0.316414	ENSG00000146147.14	0.24331	TRUE	TRUE	FALSE	FALSE	FALSE	FALSE
Colon	Myeloid cell	cg09367290	chr8:100738273:G:C	ENSG00000271882.1	0.157475	ENSG00000070756.15	0.702905	ENSG00000260368.1	0.156034	ENSG00000186106.11	0.212889	ENSG00000120963.11	0.0849698	TRUE	FALSE	TRUE	FALSE	FALSE	FALSE
Colon	Myeloid cell	cg16277608	chr9:6631099:A:G	ENSG00000178445.9	0.991007	ENSG00000223621.1	0.608897	ENSG00000147854.16	0.293184	ENSG00000183354.11	0.0998904	ENSG00000178445.9	0.991814	TRUE	TRUE	TRUE	FALSE	FALSE	TRUE
Colon	Myeloid cell	cg24851651	chr11:66581032:C:T	ENSG00000172613.7	0.865032	ENSG00000173992.8	0.977937	ENSG00000173992.8	0.934176	ENSG00000173653.7	0.563708	ENSG00000173992.8	0.99165	TRUE	TRUE	TRUE	TRUE	TRUE	TRUE
Colon	Myeloid cell	cg02054252	chr12:49299993:T:C	ENSG00000135451.12	0.410944	ENSG00000134287.9	0.897352	ENSG00000167528.12	0.425395	ENSG00000271547.1	0.521868	ENSG00000139620.12	0.78027	TRUE	FALSE	TRUE	FALSE	TRUE	TRUE
Colon	Myeloid cell	cg09035930	chr12:128795443:G:C	ENSG00000256193.5	0.063625	ENSG00000139370.11	0.328704	ENSG00000181234.9	0.112195	ENSG00000139370.11	0.865198	ENSG00000139370.11	0.0662279	TRUE	FALSE	FALSE	FALSE	TRUE	FALSE
Colon	Myeloid cell	cg10829391	chr14:100603564:G:T	ENSG00000066629.16	0.184042	ENSG00000205476.8	0.693114	ENSG00000140105.17	0.299319	ENSG00000247970.2	0.205398	ENSG00000100811.12	0.547709	TRUE	FALSE	TRUE	FALSE	FALSE	TRUE
Colon	Myeloid cell	cg02184558	chr16:67991092:G:A	ENSG00000103066.12	0.745423	ENSG00000125122.15	0.729402	ENSG00000132600.16	0.34995	ENSG00000237172.3	0.192637	ENSG00000141096.4	0.966663	TRUE	TRUE	TRUE	FALSE	FALSE	TRUE
Colon	Myeloid cell	cg00667525	chr19:18587411:T:C	ENSG00000221983.7	0.917793	ENSG00000221983.7	0.967059	ENSG00000268030.1	0.338358	ENSG00000221983.7	0.858785	ENSG00000268030.1	0.792337	TRUE	TRUE	TRUE	FALSE	TRUE	TRUE
Colon	Stromal cell	cg23982607	chr1:1866508:A:G	ENSG00000231050.1	0.990136	ENSG00000205090.8	0.240678	ENSG00000242485.5	0.722374	ENSG00000231050.1	0.86851	ENSG00000231050.1	0.976346	TRUE	TRUE	FALSE	TRUE	TRUE	TRUE
Colon	Stromal cell	cg00375145	chr1:11071610:C:CCT	ENSG00000171824.13	0.959844	ENSG00000171824.13	0.961175	ENSG00000226849.1	0.704119	ENSG00000009724.16	0.801637	ENSG00000171824.13	0.578793	TRUE	TRUE	TRUE	TRUE	TRUE	TRUE
Colon	Stromal cell	cg01958606	chr1:11813359:A:C	ENSG00000011021.21	0.926063	ENSG00000198793.12	0.451429	ENSG00000177674.15	0.674015	ENSG00000198793.12	0.278415	ENSG00000175206.10	0.421707	TRUE	TRUE	FALSE	TRUE	FALSE	FALSE
Colon	Stromal cell	cg13216073	chr1:11982204:A:G	ENSG00000116691.10	0.609275	ENSG00000162490.6	0.17315	ENSG00000116685.15	0.378903	ENSG00000120937.8	0.326831	ENSG00000120948.16	0.0573125	TRUE	TRUE	FALSE	FALSE	FALSE	FALSE
Colon	Stromal cell	cg21393163	chr1:12156431:A:C	ENSG00000028137.18	0.513866	ENSG00000239149.1	0.457815	ENSG00000202461.1	0.163661	ENSG00000120937.8	0.281505	ENSG00000028137.18	0.245085	TRUE	TRUE	FALSE	FALSE	FALSE	FALSE
Colon	Stromal cell	cg26491092	chr1:23173423:T:C	ENSG00000169641.13	0.498566	ENSG00000169641.13	0.226942	ENSG00000237200.1	0.299602	ENSG00000088280.18	0.584062	ENSG00000125945.14	0.386273	TRUE	FALSE	FALSE	FALSE	TRUE	FALSE
Colon	Stromal cell	cg02251754	chr1:28248629:T:G	ENSG00000270605.1	0.968019	ENSG00000270605.1	0.970855	ENSG00000270605.1	0.969966	ENSG00000130770.17	0.830409	ENSG00000126698.10	0.699558	TRUE	TRUE	TRUE	TRUE	TRUE	TRUE
Colon	Stromal cell	cg15059804	chr1:33296061:T:C	ENSG00000162522.10	0.139743	ENSG00000270115.1	0.911172	ENSG00000162522.10	0.271372	ENSG00000176261.15	0.119295	ENSG00000134686.18	0.410039	TRUE	FALSE	TRUE	FALSE	FALSE	FALSE
Colon	Stromal cell	cg06473178	chr1:41537350:C:T	ENSG00000227527.2	0.166723	ENSG00000066185.12	0.593836	ENSG00000117010.15	0.428954	ENSG00000230638.4	0.552572	ENSG00000066185.12	0.112037	TRUE	FALSE	TRUE	FALSE	TRUE	FALSE
Colon	Stromal cell	cg24013761	chr1:94821496:C:A	ENSG00000137962.12	0.112943	ENSG00000143036.16	0.955796	ENSG00000172339.9	0.137866	ENSG00000152078.9	0.315825	ENSG00000143036.16	0.913906	TRUE	FALSE	TRUE	FALSE	FALSE	TRUE
Colon	Stromal cell	cg07982651	chr1:94975736:C:T	ENSG00000152078.9	0.148817	ENSG00000226026.5	0.393276	ENSG00000235501.5	0.238092	ENSG00000228852.6	0.369308	ENSG00000235501.5	0.709762	TRUE	FALSE	FALSE	FALSE	FALSE	TRUE
Colon	Stromal cell	cg13423563	chr1:99580690:T:G	ENSG00000223656.1	0.18038	ENSG00000234332.1	0.512723	ENSG00000181656.6	0.146299	ENSG00000122435.9	0.12186	ENSG00000224616.1	0.156804	TRUE	FALSE	TRUE	FALSE	FALSE	FALSE
Colon	Stromal cell	cg09158440	chr1:152033006:C:G	ENSG00000196407.11	0.530402	ENSG00000163191.5	0.637151	ENSG00000213190.3	0.145169	ENSG00000143536.7	0.238519	ENSG00000143458.11	0.369838	TRUE	TRUE	TRUE	FALSE	FALSE	FALSE
Colon	Stromal cell	cg27397230	chr1:154431860:C:T	ENSG00000160712.12	0.797212	ENSG00000143543.14	0.278298	ENSG00000163348.3	0.325211	ENSG00000143543.14	0.302986	ENSG00000160712.12	0.978519	TRUE	TRUE	FALSE	FALSE	FALSE	TRUE
Colon	Stromal cell	cg13572380	chr1:154731249:G:A	ENSG00000235919.4	0.533424	ENSG00000169291.9	0.349515	ENSG00000143630.9	0.196982	ENSG00000143537.13	0.434195	ENSG00000143569.18	0.861381	TRUE	TRUE	FALSE	FALSE	FALSE	TRUE
Colon	Stromal cell	cg11827190	chr1:180513488:G:A	ENSG00000229407.5	0.544951	ENSG00000260360.1	0.360901	ENSG00000143340.6	0.151678	ENSG00000227141.2	0.124204	ENSG00000162783.10	0.262417	TRUE	TRUE	FALSE	FALSE	FALSE	FALSE
Colon	Stromal cell	cg12552165	chr1:183186170:G:A	ENSG00000058085.14	0.999103	ENSG00000058085.14	0.961884	ENSG00000058085.14	0.4851	ENSG00000198860.11	0.193277	ENSG00000261504.1	0.133532	TRUE	TRUE	TRUE	FALSE	FALSE	FALSE
Colon	Stromal cell	cg27004073	chr1:207890463:G:A	ENSG00000174059.16	0.269203	ENSG00000117335.19	0.344539	ENSG00000123838.10	0.562123	ENSG00000076356.6	0.593091	ENSG00000203710.10	0.525741	TRUE	FALSE	FALSE	TRUE	TRUE	TRUE
Colon	Stromal cell	cg21924403	chr1:207890463:G:A	ENSG00000174059.16	0.268908	ENSG00000117335.19	0.3447	ENSG00000123838.10	0.561769	ENSG00000076356.6	0.593742	ENSG00000203710.10	0.525394	TRUE	FALSE	FALSE	TRUE	TRUE	TRUE
Colon	Stromal cell	cg14378539	chr1:218524685:C:T	ENSG00000225920.2	0.920032	ENSG00000228063.1	0.0802058	ENSG00000162814.10	0.166152	ENSG00000092969.11	0.359303	ENSG00000092978.10	0.0560765	TRUE	TRUE	FALSE	FALSE	FALSE	FALSE
Colon	Stromal cell	cg10327440	chr1:226990182:T:TACA	ENSG00000163050.16	0.279194	ENSG00000203685.9	0.436499	ENSG00000143772.9	0.19751	ENSG00000163041.9	0.202385	ENSG00000143801.16	0.918898	TRUE	FALSE	FALSE	FALSE	FALSE	TRUE
Colon	Stromal cell	cg14580920	chr1:246485145:T:C	ENSG00000221953.5	0.308196	ENSG00000227953.6	0.191963	ENSG00000162852.13	0.303071	ENSG00000162714.12	0.880449	ENSG00000185420.18	0.132552	TRUE	FALSE	FALSE	FALSE	TRUE	FALSE
Colon	Stromal cell	cg14990413	chr2:7053004:T:C	ENSG00000228203.6	0.0710728	ENSG00000228203.6	0.867362	ENSG00000205837.7	0.103092	ENSG00000271947.1	0.887255	ENSG00000134321.11	0.0812337	TRUE	FALSE	TRUE	FALSE	TRUE	FALSE
Colon	Stromal cell	cg01969012	chr2:27428508:C:T	ENSG00000115216.13	0.999902	ENSG00000235267.1	0.651978	ENSG00000235267.1	0.845383	ENSG00000234072.1	0.963612	ENSG00000115216.13	0.996255	TRUE	TRUE	TRUE	TRUE	TRUE	TRUE
Colon	Stromal cell	cg13652008	chr2:32904614:C:G	ENSG00000115760.13	0.407606	ENSG00000152689.17	0.63421	ENSG00000276517.1	0.126756	ENSG00000276517.1	0.525039	ENSG00000162959.13	0.433414	TRUE	FALSE	TRUE	FALSE	TRUE	FALSE
Colon	Stromal cell	cg08715262	chr2:43294028:G:A	ENSG00000279873.2	0.588035	ENSG00000138079.13	0.261057	ENSG00000279873.2	0.150329	ENSG00000279873.2	0.488213	ENSG00000234936.1	0.266537	TRUE	TRUE	FALSE	FALSE	FALSE	FALSE
Colon	Stromal cell	cg00209038	chr2:48595242:G:A	ENSG00000242441.7	1	ENSG00000242441.7	1	ENSG00000282890.1	1	ENSG00000242441.7	1	ENSG00000272663.1	0.0794367	TRUE	TRUE	TRUE	TRUE	TRUE	FALSE
Colon	Stromal cell	cg20156659	chr2:48595242:G:A	ENSG00000068781.21	1	ENSG00000242441.7	1	ENSG00000242441.7	1	ENSG00000242441.7	1	ENSG00000272663.1	0.079433	TRUE	TRUE	TRUE	TRUE	TRUE	FALSE
Colon	Stromal cell	cg23599385	chr2:106022932:T:G	ENSG00000115641.18	0.0958944	ENSG00000272861.1	0.689368	ENSG00000071051.13	0.177717	ENSG00000272861.1	0.0998522	ENSG00000272994.1	0.145054	TRUE	FALSE	TRUE	FALSE	FALSE	FALSE
Colon	Stromal cell	cg21130420	chr2:113827728:A:G	ENSG00000125538.11	0.203552	ENSG00000228857.2	0.946096	ENSG00000244063.1	0.964573	ENSG00000244063.1	0.974149	ENSG00000244063.1	0.954371	TRUE	FALSE	TRUE	TRUE	TRUE	TRUE
Colon	Stromal cell	cg16192086	chr2:113833617:A:G	ENSG00000125538.11	0.202475	ENSG00000228857.2	0.948529	ENSG00000244063.1	0.957876	ENSG00000244063.1	0.972509	ENSG00000244063.1	0.952311	TRUE	FALSE	TRUE	TRUE	TRUE	TRUE
Colon	Stromal cell	cg08168884	chr2:161131972:T:C	ENSG00000197635.9	0.107989	ENSG00000226121.2	0.684013	ENSG00000236841.7	0.122616	ENSG00000230918.1	0.177497	ENSG00000153250.19	0.0519239	TRUE	FALSE	TRUE	FALSE	FALSE	FALSE
Colon	Stromal cell	cg16040230	chr2:201159226:A:G	ENSG00000155744.9	0.515682	ENSG00000003400.14	0.908529	ENSG00000003393.14	0.234004	ENSG00000003400.14	0.954263	ENSG00000115942.8	0.225774	TRUE	TRUE	TRUE	FALSE	TRUE	FALSE
Colon	Stromal cell	cg17109053	chr2:222847054:C:T	ENSG00000123983.13	0.23951	ENSG00000123983.13	0.665698	ENSG00000116120.9	0.196934	ENSG00000152049.6	0.114975	ENSG00000123983.13	0.300823	TRUE	FALSE	TRUE	FALSE	FALSE	FALSE
Colon	Stromal cell	cg07053536	chr2:237538525:T:C	ENSG00000168427.8	0.814475	ENSG00000184182.18	0.554115	ENSG00000144488.14	0.33309	ENSG00000115648.13	0.834491	ENSG00000163359.15	0.318965	TRUE	TRUE	TRUE	FALSE	TRUE	FALSE
Colon	Stromal cell	cg10458446	chr2:237590675:A:G	ENSG00000124839.12	0.987636	ENSG00000198612.10	0.52979	ENSG00000283635.1	0.530699	ENSG00000232306.2	0.6627	ENSG00000124839.12	0.9887	TRUE	TRUE	TRUE	TRUE	TRUE	TRUE
Colon	Stromal cell	cg04903544	chr2:240896921:T:C	ENSG00000172478.17	0.988423	ENSG00000172478.17	0.866623	ENSG00000225521.1	0.317072	ENSG00000172478.17	0.969074	ENSG00000130294.15	0.141481	TRUE	TRUE	TRUE	FALSE	TRUE	FALSE
Colon	Stromal cell	cg19814552	chr3:27561495:G:A	ENSG00000213846.5	0.955539	ENSG00000206559.7	0.115855	ENSG00000163512.13	0.106028	ENSG00000206559.7	0.0760297	ENSG00000033867.16	0.989022	TRUE	TRUE	FALSE	FALSE	FALSE	TRUE
Colon	Stromal cell	cg06798115	chr3:45200130:C:G	ENSG00000011376.9	0.77872	ENSG00000163812.13	0.352535	ENSG00000249992.1	0.494503	ENSG00000075914.12	0.498487	ENSG00000183625.14	0.108676	TRUE	TRUE	FALSE	FALSE	FALSE	FALSE
Colon	Stromal cell	cg02037349	chr3:49794828:A:G	ENSG00000182179.12	0.946258	ENSG00000182179.12	0.939209	ENSG00000164068.15	0.927558	ENSG00000164068.15	0.926076	ENSG00000182179.12	0.965526	TRUE	TRUE	TRUE	TRUE	TRUE	TRUE
Colon	Stromal cell	cg20735041	chr3:52835247:C:A	ENSG00000280422.1	0.192135	ENSG00000242797.3	0.271834	ENSG00000157388.15	0.309469	ENSG00000056736.9	0.273814	ENSG00000279144.1	0.97829	TRUE	FALSE	FALSE	FALSE	FALSE	TRUE
Colon	Stromal cell	cg06643156	chr3:58493627:A:G	ENSG00000244161.1	0.552478	ENSG00000168301.12	0.528621	ENSG00000272360.1	0.144412	ENSG00000168291.12	0.741574	ENSG00000272182.1	0.741768	TRUE	TRUE	TRUE	FALSE	TRUE	TRUE
Colon	Stromal cell	cg22300541	chr3:65203691:C:T	ENSG00000151276.23	0.146319	ENSG00000151276.23	0.791157	ENSG00000163638.13	0.166328	ENSG00000163638.13	0.0982375	ENSG00000144741.17	0.0459697	TRUE	FALSE	TRUE	FALSE	FALSE	FALSE
Colon	Stromal cell	cg15941598	chr3:101785830:G:A	ENSG00000114354.13	0.67131	ENSG00000256628.3	0.588641	ENSG00000256628.3	0.521475	ENSG00000138468.15	0.699695	ENSG00000256628.3	0.576839	TRUE	TRUE	TRUE	TRUE	TRUE	TRUE
Colon	Stromal cell	cg06823220	chr3:122910575:C:T	ENSG00000138463.8	0.6759	ENSG00000138463.8	0.955942	ENSG00000273033.2	0.35939	ENSG00000138463.8	0.466075	ENSG00000273033.2	0.976601	TRUE	TRUE	TRUE	FALSE	FALSE	TRUE
Colon	Stromal cell	cg05256313	chr3:125207859:G:A	ENSG00000221955.10	0.989178	ENSG00000250012.1	0.269288	ENSG00000241278.1	0.528549	ENSG00000189366.9	0.127516	ENSG00000189366.9	0.32323	TRUE	TRUE	FALSE	TRUE	FALSE	FALSE
Colon	Stromal cell	cg15546194	chr3:138080449:A:T	ENSG00000158163.14	0.854074	ENSG00000158163.14	0.98806	ENSG00000158163.14	0.951097	ENSG00000158163.14	0.945655	ENSG00000114098.17	0.170485	TRUE	TRUE	TRUE	TRUE	TRUE	FALSE
Colon	Stromal cell	cg01289541	chr3:170557329:A:G	ENSG00000136603.13	0.591511	ENSG00000184378.2	0.455209	ENSG00000270096.1	0.521101	ENSG00000269984.1	0.120391	ENSG00000269984.1	0.0947461	TRUE	TRUE	FALSE	TRUE	FALSE	FALSE
Colon	Stromal cell	cg02757804	chr3:190123081:A:ATGAG	ENSG00000225764.1	0.0573606	ENSG00000090530.9	0.975393	ENSG00000090530.9	0.132062	ENSG00000196083.9	0.183089	ENSG00000223117.1	0.283197	TRUE	FALSE	TRUE	FALSE	FALSE	FALSE
Colon	Stromal cell	cg23035323	chr3:194535324:G:C	ENSG00000244675.2	0.191213	ENSG00000229334.1	0.327202	ENSG00000173950.15	0.0810934	ENSG00000229325.1	0.242849	ENSG00000133657.14	0.765512	TRUE	FALSE	FALSE	FALSE	FALSE	TRUE
Colon	Stromal cell	cg25120210	chr4:3462949:T:TAGTGGG	ENSG00000175920.16	0.935835	ENSG00000087269.15	0.150666	ENSG00000063978.15	0.100207	ENSG00000175920.16	0.975036	ENSG00000168884.14	0.0687359	TRUE	TRUE	FALSE	FALSE	TRUE	FALSE
Colon	Stromal cell	cg10270595	chr4:73483441:G:A	ENSG00000124882.3	0.152471	ENSG00000124875.9	0.0849305	ENSG00000163626.16	0.432746	ENSG00000169435.13	0.631097	ENSG00000132466.18	0.103864	TRUE	FALSE	FALSE	FALSE	TRUE	FALSE
Colon	Stromal cell	cg00319655	chr4:78541406:A:T	ENSG00000163291.14	0.528194	ENSG00000138756.17	0.566982	ENSG00000138772.12	0.274986	ENSG00000138756.17	0.156189	ENSG00000138772.12	0.976665	TRUE	TRUE	TRUE	FALSE	FALSE	TRUE
Colon	Stromal cell	cg00096603	chr4:94650825:G:C	ENSG00000163110.14	0.211117	ENSG00000163110.14	0.868197	ENSG00000271474.1	0.0846707	ENSG00000249599.1	0.571656	ENSG00000163110.14	0.813162	TRUE	FALSE	TRUE	FALSE	TRUE	TRUE
Colon	Stromal cell	cg09062922	chr5:132101145:C:T	ENSG00000230612.3	0.640541	ENSG00000072364.12	0.182022	ENSG00000131437.15	0.422378	ENSG00000170606.14	0.211624	ENSG00000131437.15	0.896398	TRUE	TRUE	FALSE	FALSE	FALSE	TRUE
Colon	Stromal cell	cg02682369	chr5:132433581:G:A	ENSG00000164404.8	0.13901	ENSG00000202533.1	0.715563	ENSG00000164398.12	0.370892	ENSG00000202533.1	0.609564	ENSG00000202533.1	0.765958	TRUE	FALSE	TRUE	FALSE	TRUE	TRUE
Colon	Stromal cell	cg07240785	chr5:150601596:C:T	ENSG00000123643.12	0.467514	ENSG00000171992.12	0.420403	ENSG00000182578.13	0.189794	ENSG00000113721.13	0.559241	ENSG00000155850.7	0.356596	TRUE	FALSE	FALSE	FALSE	TRUE	FALSE
Colon	Stromal cell	cg25620989	chr5:163449295:AAGGTCAC:A	ENSG00000038274.16	0.105637	ENSG00000170584.10	0.438314	ENSG00000170584.10	0.961454	ENSG00000113328.18	0.307038	ENSG00000113328.18	0.257091	TRUE	FALSE	FALSE	TRUE	FALSE	FALSE
Colon	Stromal cell	cg27390840	chr5:169203924:C:T	ENSG00000188573.7	0.239147	ENSG00000134516.15	0.412728	ENSG00000113643.8	0.72514	ENSG00000254042.1	0.14368	ENSG00000134516.15	0.213389	TRUE	FALSE	FALSE	TRUE	FALSE	FALSE
Colon	Stromal cell	cg06730250	chr5:178393133:T:C	ENSG00000254035.1	0.582195	ENSG00000178187.7	0.135495	ENSG00000087116.14	0.244333	ENSG00000196923.13	0.126121	ENSG00000197451.11	0.50642	TRUE	TRUE	FALSE	FALSE	FALSE	TRUE
Colon	Stromal cell	cg08999896	chr5:179258843:G:A	ENSG00000245317.2	0.545113	ENSG00000113240.12	0.286379	ENSG00000169131.11	0.448721	ENSG00000278965.1	0.338554	ENSG00000169045.17	0.301116	TRUE	TRUE	FALSE	FALSE	FALSE	FALSE
Colon	Stromal cell	cg23207339	chr6:6834441:G:A	ENSG00000279368.1	0.268575	ENSG00000124785.8	0.107085	ENSG00000112799.8	0.281924	ENSG00000153162.8	0.561515	ENSG00000124784.8	0.0622127	TRUE	FALSE	FALSE	FALSE	TRUE	FALSE
Colon	Stromal cell	cg02090877	chr6:8495979:A:G	ENSG00000230939.1	0.802526	ENSG00000230939.1	0.812358	ENSG00000230939.1	0.549084	ENSG00000230939.1	0.785661	ENSG00000188428.19	0.0988454	TRUE	TRUE	TRUE	TRUE	TRUE	FALSE
Colon	Stromal cell	cg02683197	chr6:28140307:C:T	ENSG00000280107.1	0.866541	ENSG00000280107.1	0.826776	ENSG00000220721.1	0.806041	ENSG00000219392.1	0.847855	ENSG00000219392.1	0.892895	TRUE	TRUE	TRUE	TRUE	TRUE	TRUE
Colon	Stromal cell	cg03373132	chr6:32478648:GAAT:G	ENSG00000240065.7	0.229403	ENSG00000204410.14	0.746123	ENSG00000225914.1	0.376552	ENSG00000236104.2	0.606771	ENSG00000231389.7	0.270733	TRUE	FALSE	TRUE	FALSE	TRUE	FALSE
Colon	Stromal cell	cg13560919	chr6:33568009:C:T	ENSG00000241106.6	0.198141	ENSG00000237649.7	0.776745	ENSG00000204194.1	0.569579	ENSG00000237541.3	0.225575	ENSG00000240065.7	0.584267	TRUE	FALSE	TRUE	TRUE	FALSE	TRUE
Colon	Stromal cell	cg16361253	chr6:47634566:G:A	ENSG00000153294.11	0.85664	ENSG00000146072.6	0.329513	ENSG00000164393.8	0.889197	ENSG00000146233.7	0.303229	ENSG00000146070.16	0.10629	TRUE	TRUE	FALSE	TRUE	FALSE	FALSE
Colon	Stromal cell	cg03298716	chr6:167793777:T:C	ENSG00000269155.2	0.997023	ENSG00000198221.8	0.306036	ENSG00000269155.2	0.214774	ENSG00000227598.1	0.142759	ENSG00000026297.15	0.378717	TRUE	TRUE	FALSE	FALSE	FALSE	FALSE
Colon	Stromal cell	cg05733780	chr6:167793777:T:C	ENSG00000269155.2	0.997186	ENSG00000198221.8	0.302823	ENSG00000269155.2	0.216454	ENSG00000227598.1	0.143917	ENSG00000026297.15	0.378762	TRUE	TRUE	FALSE	FALSE	FALSE	FALSE
Colon	Stromal cell	cg26850117	chr6:169761885:A:G	ENSG00000266896.1	0.43143	ENSG00000130023.15	0.436276	ENSG00000130023.15	0.876606	ENSG00000130023.15	0.792517	ENSG00000266896.1	0.183393	TRUE	FALSE	FALSE	TRUE	TRUE	FALSE
Colon	Stromal cell	cg06098425	chr7:96251217:C:T	ENSG00000004864.13	0.639947	ENSG00000005981.12	0.174663	ENSG00000005981.12	0.393736	ENSG00000005981.12	0.716086	ENSG00000127922.9	0.159185	TRUE	TRUE	FALSE	FALSE	TRUE	FALSE
Colon	Stromal cell	cg17096719	chr7:96281893:G:C	ENSG00000233942.1	0.809328	ENSG00000004864.13	0.973598	ENSG00000231764.8	0.208746	ENSG00000233942.1	0.691799	ENSG00000004864.13	0.907892	TRUE	TRUE	TRUE	FALSE	TRUE	TRUE
Colon	Stromal cell	cg21770322	chr7:98167323:C:T	ENSG00000242687.2	0.202738	ENSG00000180535.3	0.893696	ENSG00000242687.2	0.122652	ENSG00000180535.3	0.966228	ENSG00000180535.3	0.0830227	TRUE	FALSE	TRUE	FALSE	TRUE	FALSE
Colon	Stromal cell	cg05727605	chr7:116777794:G:C	ENSG00000105976.14	0.755817	ENSG00000154438.7	0.419779	ENSG00000279086.1	0.166417	ENSG00000105976.14	0.124602	ENSG00000004866.20	0.127858	TRUE	TRUE	FALSE	FALSE	FALSE	FALSE
Colon	Stromal cell	cg08074000	chr7:116777794:G:C	ENSG00000105976.14	0.7659	ENSG00000154438.7	0.431523	ENSG00000279086.1	0.163598	ENSG00000105976.14	0.123955	ENSG00000004866.20	0.133062	TRUE	TRUE	FALSE	FALSE	FALSE	FALSE
Colon	Stromal cell	cg22430036	chr7:134908760:C:G	ENSG00000155561.14	0.11125	ENSG00000146856.14	0.156366	ENSG00000146859.6	0.194119	ENSG00000146856.14	0.110002	ENSG00000155530.2	0.59525	TRUE	FALSE	FALSE	FALSE	FALSE	TRUE
Colon	Stromal cell	cg19889856	chr7:135171535:CCT:C	ENSG00000122783.16	0.985243	ENSG00000122783.16	0.983544	ENSG00000146859.6	0.421146	ENSG00000122783.16	0.884568	ENSG00000122783.16	0.976538	TRUE	TRUE	TRUE	FALSE	TRUE	TRUE
Colon	Stromal cell	cg14442992	chr7:150323400:T:C	ENSG00000261305.1	0.925558	ENSG00000127399.14	0.947685	ENSG00000261305.1	0.937828	ENSG00000261305.1	0.977731	ENSG00000127399.14	0.939113	TRUE	TRUE	TRUE	TRUE	TRUE	TRUE
Colon	Stromal cell	cg20400248	chr8:9147783:CTAAT:C	ENSG00000254153.1	0.405085	ENSG00000173281.4	0.367753	ENSG00000253893.2	0.986836	ENSG00000254153.1	0.551701	ENSG00000254340.1	0.260815	TRUE	FALSE	FALSE	TRUE	TRUE	FALSE
Colon	Stromal cell	cg01002857	chr8:11862718:G:C	ENSG00000154328.15	0.322772	ENSG00000164733.20	0.242543	ENSG00000254936.4	0.211844	ENSG00000227203.3	0.440859	ENSG00000164733.20	0.999999	TRUE	FALSE	FALSE	FALSE	FALSE	TRUE
Colon	Stromal cell	cg10771525	chr8:48617425:C:A	ENSG00000253608.1	0.185216	ENSG00000253688.2	0.236596	ENSG00000169139.11	0.19211	ENSG00000279881.1	0.789617	ENSG00000019549.9	0.0629147	TRUE	FALSE	FALSE	FALSE	TRUE	FALSE
Colon	Stromal cell	cg23313235	chr8:80965161:A:G	ENSG00000147588.6	0.548969	ENSG00000205189.11	0.17149	ENSG00000076641.4	0.267791	ENSG00000170323.8	0.117187	ENSG00000237264.4	0.059199	TRUE	TRUE	FALSE	FALSE	FALSE	FALSE
Colon	Stromal cell	cg16675872	chr8:129241197:G:C	ENSG00000153310.19	0.737948	ENSG00000254317.1	0.0460205	ENSG00000254317.1	0.109124	ENSG00000254317.1	0.0960138	ENSG00000254317.1	0.0495973	TRUE	TRUE	FALSE	FALSE	FALSE	FALSE
Colon	Stromal cell	cg25030508	chr8:133352302:C:T	ENSG00000104419.14	0.100127	ENSG00000270137.1	0.176335	ENSG00000184156.16	0.185531	ENSG00000243537.1	0.980651	ENSG00000129295.8	0.092548	TRUE	FALSE	FALSE	FALSE	TRUE	FALSE
Colon	Stromal cell	cg24996280	chr8:142399832:G:A	ENSG00000130193.7	0.225969	ENSG00000176956.12	0.699564	ENSG00000253741.1	0.147743	ENSG00000261693.1	0.959654	ENSG00000182759.3	0.153586	TRUE	FALSE	TRUE	FALSE	TRUE	FALSE
Colon	Stromal cell	cg01745932	chr8:142780034:T:G	ENSG00000253196.1	0.971189	ENSG00000283992.1	0.978268	ENSG00000180155.19	0.946491	ENSG00000283992.1	0.960193	ENSG00000180921.6	0.189089	TRUE	TRUE	TRUE	TRUE	TRUE	FALSE
Colon	Stromal cell	cg12688965	chr8:143511626:G:C	ENSG00000180155.19	0.598402	ENSG00000104529.17	0.617442	ENSG00000014164.6	0.97621	ENSG00000014164.6	0.542311	ENSG00000173137.11	0.501301	TRUE	TRUE	TRUE	TRUE	TRUE	TRUE
Colon	Stromal cell	cg00036352	chr8:143547693:A:C	ENSG00000126233.1	0.509917	ENSG00000173137.11	0.309102	ENSG00000160932.10	0.127547	ENSG00000227473.1	0.379834	ENSG00000104518.10	0.896706	TRUE	TRUE	FALSE	FALSE	FALSE	TRUE
Colon	Stromal cell	cg13857646	chr9:137461922:C:A	ENSG00000177943.13	0.750994	ENSG00000165802.21	0.998679	ENSG00000188833.9	0.388171	ENSG00000268996.3	0.924061	ENSG00000213590.2	0.436247	TRUE	TRUE	TRUE	FALSE	TRUE	FALSE
Colon	Stromal cell	cg05833351	chr10:11046115:C:T	ENSG00000048740.18	0.877295	ENSG00000148429.14	0.300044	ENSG00000148426.12	0.398254	ENSG00000225778.5	0.109981	ENSG00000271046.1	0.268871	TRUE	TRUE	FALSE	FALSE	FALSE	FALSE
Colon	Stromal cell	cg10237277	chr10:48493830:G:A	ENSG00000279822.1	0.118529	ENSG00000273760.1	0.828927	ENSG00000279822.1	0.403478	ENSG00000278561.1	0.42981	ENSG00000265190.6	0.194175	TRUE	FALSE	TRUE	FALSE	FALSE	FALSE
Colon	Stromal cell	cg12771178	chr10:49171988:C:T	ENSG00000165606.8	0.097862	ENSG00000279822.1	0.116236	ENSG00000233665.8	0.104444	ENSG00000197444.9	0.526847	ENSG00000204152.10	0.21733	TRUE	FALSE	FALSE	FALSE	TRUE	FALSE
Colon	Stromal cell	cg22380090	chr10:59678952:T:C	ENSG00000165443.11	0.0682514	ENSG00000232682.2	0.0565655	ENSG00000165449.11	0.741913	ENSG00000232682.2	0.172801	ENSG00000151150.21	0.00481457	TRUE	FALSE	FALSE	TRUE	FALSE	FALSE
Colon	Stromal cell	cg11932029	chr10:71504513:A:G	ENSG00000148719.14	0.253638	ENSG00000148719.14	0.330139	ENSG00000107738.19	0.186968	ENSG00000107736.19	0.98608	ENSG00000198246.7	0.202681	TRUE	FALSE	FALSE	FALSE	TRUE	FALSE
Colon	Stromal cell	cg26036858	chr11:3126773:G:A	ENSG00000021762.19	0.989546	ENSG00000184281.14	0.259341	ENSG00000167323.11	0.151362	ENSG00000205531.12	0.132429	ENSG00000184281.14	0.385166	TRUE	TRUE	FALSE	FALSE	FALSE	FALSE
Colon	Stromal cell	cg03339077	chr11:47190992:A:G	ENSG00000175224.16	0.736629	ENSG00000134569.9	0.904769	ENSG00000025434.18	0.892954	ENSG00000165912.15	0.930699	ENSG00000175220.11	0.444677	TRUE	TRUE	TRUE	TRUE	TRUE	FALSE
Colon	Stromal cell	cg09921266	chr11:47163959:A:G	ENSG00000175213.2	0.905903	ENSG00000175220.11	0.73478	ENSG00000149179.13	0.797357	ENSG00000175213.2	0.867	ENSG00000175220.11	0.652183	TRUE	TRUE	TRUE	TRUE	TRUE	TRUE
Colon	Stromal cell	cg18856296	chr11:60841181:T:C	ENSG00000124920.13	0.404534	ENSG00000257052.1	0.782281	ENSG00000167986.13	0.230825	ENSG00000257052.1	0.320253	ENSG00000183134.4	0.336408	TRUE	FALSE	TRUE	FALSE	FALSE	FALSE
Colon	Stromal cell	cg09786210	chr11:75583288:A:G	ENSG00000255326.1	0.977544	ENSG00000255434.1	0.991839	ENSG00000255326.1	0.995816	ENSG00000255326.1	0.991226	ENSG00000149257.13	0.986536	TRUE	TRUE	TRUE	TRUE	TRUE	TRUE
Colon	Stromal cell	cg15968721	chr11:75582937:G:A	ENSG00000255326.1	0.976949	ENSG00000255434.1	0.991414	ENSG00000255326.1	0.994818	ENSG00000255326.1	0.993888	ENSG00000149257.13	0.990508	TRUE	TRUE	TRUE	TRUE	TRUE	TRUE
Colon	Stromal cell	cg23743573	chr11:90128745:T:C	ENSG00000077616.10	0.871305	ENSG00000077616.10	0.86027	ENSG00000077616.10	0.82113	ENSG00000077616.10	0.887564	ENSG00000077616.10	0.108109	TRUE	TRUE	TRUE	TRUE	TRUE	FALSE
Colon	Stromal cell	cg14960550	chr11:90130618:T:C	ENSG00000077616.10	0.859958	ENSG00000077616.10	0.83412	ENSG00000077616.10	0.777781	ENSG00000077616.10	0.890241	ENSG00000077616.10	0.108099	TRUE	TRUE	TRUE	TRUE	TRUE	FALSE
Colon	Stromal cell	cg26945217	chr11:90114273:A:G	ENSG00000077616.10	0.806714	ENSG00000077616.10	0.752686	ENSG00000077616.10	0.796502	ENSG00000077616.10	0.872752	ENSG00000077616.10	0.093279	TRUE	TRUE	TRUE	TRUE	TRUE	FALSE
Colon	Stromal cell	cg01887834	chr11:94603265:T:C	ENSG00000263465.4	0.554735	ENSG00000182919.14	0.408357	ENSG00000182919.14	0.431174	ENSG00000149212.11	0.35748	ENSG00000134627.11	0.991551	TRUE	TRUE	FALSE	FALSE	FALSE	TRUE
Colon	Stromal cell	cg16016366	chr12:52533038:C:T	ENSG00000270175.1	0.520094	ENSG00000135409.10	0.471725	ENSG00000182544.8	0.215491	ENSG00000063046.17	0.694259	ENSG00000123358.19	0.167711	TRUE	TRUE	FALSE	FALSE	TRUE	FALSE
Colon	Stromal cell	cg08025038	chr12:54182016:C:A	ENSG00000248265.1	1	ENSG00000248265.1	1	ENSG00000248265.1	0.999951	ENSG00000248265.1	1	ENSG00000250742.2	1	TRUE	TRUE	TRUE	TRUE	TRUE	TRUE
Colon	Stromal cell	cg13848087	chr12:89456163:A:G	ENSG00000139323.13	0.114217	ENSG00000257594.3	0.318031	ENSG00000139323.13	0.85511	ENSG00000274021.1	0.110405	ENSG00000139318.7	0.23822	TRUE	FALSE	FALSE	TRUE	FALSE	FALSE
Colon	Stromal cell	cg14223669	chr12:94636947:G:C	ENSG00000136040.8	0.158588	ENSG00000241556.1	0.141854	ENSG00000258357.1	0.411231	ENSG00000257150.3	0.122552	ENSG00000120798.16	0.740645	TRUE	FALSE	FALSE	FALSE	FALSE	TRUE
Colon	Stromal cell	cg26403760	chr13:36094644:C:T	ENSG00000133101.9	0.161807	ENSG00000133083.14	0.93546	ENSG00000232795.1	0.124246	ENSG00000133083.14	0.100647	ENSG00000133111.3	0.0973069	TRUE	FALSE	TRUE	FALSE	FALSE	FALSE
Colon	Stromal cell	cg19190762	chr13:44231356:T:C	ENSG00000151778.10	0.936262	ENSG00000278156.1	0.0586853	ENSG00000274001.1	0.182325	ENSG00000233725.7	0.143641	ENSG00000083635.7	0.12066	TRUE	TRUE	FALSE	FALSE	FALSE	FALSE
Colon	Stromal cell	cg26269162	chr13:112906065:T:C	ENSG00000233695.2	0.501092	ENSG00000277545.1	0.402647	ENSG00000233695.2	0.198184	ENSG00000184497.12	0.361071	ENSG00000183087.14	0.253791	TRUE	TRUE	FALSE	FALSE	FALSE	FALSE
Colon	Stromal cell	cg11974136	chr14:68294269:C:G	ENSG00000139988.9	0.17004	ENSG00000185650.9	0.576473	ENSG00000134001.12	0.105415	ENSG00000258623.1	0.779834	ENSG00000072042.12	0.308316	TRUE	FALSE	TRUE	FALSE	TRUE	FALSE
Colon	Stromal cell	cg13001075	chr14:76828607:C:T	ENSG00000013523.9	0.935938	ENSG00000013523.9	0.801085	ENSG00000071246.10	0.40408	ENSG00000119715.14	0.636466	ENSG00000119699.7	0.318396	TRUE	TRUE	TRUE	FALSE	TRUE	FALSE
Colon	Stromal cell	cg19590140	chr14:100532511:A:G	ENSG00000183092.16	0.982185	ENSG00000183092.16	0.981225	ENSG00000183092.16	0.988088	ENSG00000183092.16	0.98634	ENSG00000183092.16	0.990666	TRUE	TRUE	TRUE	TRUE	TRUE	TRUE
Colon	Stromal cell	cg10829391	chr14:100603552:CT:C	ENSG00000066629.16	0.183985	ENSG00000205476.8	0.693366	ENSG00000140105.17	0.302431	ENSG00000247970.2	0.204986	ENSG00000100811.12	0.547855	TRUE	FALSE	TRUE	FALSE	FALSE	TRUE
Colon	Stromal cell	cg21859216	chr14:104234511:C:G	ENSG00000258913.1	0.967205	ENSG00000258913.1	0.65748	ENSG00000258913.1	0.54543	ENSG00000258913.1	0.799006	ENSG00000269958.1	0.110838	TRUE	TRUE	TRUE	TRUE	TRUE	FALSE
Colon	Stromal cell	cg19800635	chr15:26052186:A:G	ENSG00000280234.1	0.305091	ENSG00000166206.14	0.513829	ENSG00000270523.1	0.548829	ENSG00000261529.1	0.0987133	ENSG00000114062.18	0.0396286	TRUE	FALSE	TRUE	TRUE	FALSE	FALSE
Colon	Stromal cell	cg18767073	chr15:26052477:C:T	ENSG00000280234.1	0.413848	ENSG00000166206.14	0.439051	ENSG00000270523.1	0.574601	ENSG00000182256.12	0.0669242	ENSG00000114062.18	0.0411527	TRUE	FALSE	FALSE	TRUE	FALSE	FALSE
Colon	Stromal cell	cg14111612	chr15:32899146:AAAAC:A	ENSG00000259446.5	0.181216	ENSG00000254912.2	0.580106	ENSG00000248905.8	0.115726	ENSG00000206127.10	0.110102	ENSG00000259287.2	0.103706	TRUE	FALSE	TRUE	FALSE	FALSE	FALSE
Colon	Stromal cell	cg14076977	chr15:40308855:GCTCTCCT:G	ENSG00000137841.11	0.863206	ENSG00000137841.11	0.941996	ENSG00000276107.1	0.205138	ENSG00000279537.1	0.188562	ENSG00000245849.6	0.376179	TRUE	TRUE	TRUE	FALSE	FALSE	FALSE
Colon	Stromal cell	cg21931938	chr15:40308855:GCTCTCCT:G	ENSG00000137841.11	0.943347	ENSG00000137841.11	0.994427	ENSG00000276107.1	0.194939	ENSG00000279537.1	0.189084	ENSG00000245849.6	0.371877	TRUE	TRUE	TRUE	FALSE	FALSE	FALSE
Colon	Stromal cell	cg05111383	chr15:40592238:T:C	ENSG00000128891.15	0.754059	ENSG00000128891.15	0.754059	ENSG00000223313.1	0.777331	ENSG00000128891.15	0.758713	ENSG00000169105.7	0.792403	TRUE	TRUE	TRUE	TRUE	TRUE	TRUE
Colon	Stromal cell	cg04093349	chr15:66699126:C:G	ENSG00000166949.15	0.163439	ENSG00000274995.1	0.10108	ENSG00000261351.2	0.178291	ENSG00000137764.19	0.193928	ENSG00000075131.9	0.545997	TRUE	FALSE	FALSE	FALSE	FALSE	TRUE
Colon	Stromal cell	cg22576950	chr15:68230512:G:A	ENSG00000128973.12	0.919765	ENSG00000033800.13	0.517972	ENSG00000128973.12	0.21588	ENSG00000212766.9	0.665138	ENSG00000129007.14	0.906368	TRUE	TRUE	TRUE	FALSE	TRUE	TRUE
Colon	Stromal cell	cg14940396	chr15:90112341:C:T	ENSG00000182054.9	0.875519	ENSG00000182054.9	0.864902	ENSG00000182054.9	0.953647	ENSG00000185518.11	0.419215	ENSG00000182054.9	0.197296	TRUE	TRUE	TRUE	TRUE	FALSE	FALSE
Colon	Stromal cell	cg00235270	chr16:588264:C:G	ENSG00000103266.10	0.854701	ENSG00000260394.2	0.760014	ENSG00000103266.10	0.89073	ENSG00000103269.13	0.940931	ENSG00000197562.9	0.929718	TRUE	TRUE	TRUE	TRUE	TRUE	TRUE
Colon	Stromal cell	cg00523434	chr16:937877:A:G	ENSG00000172366.19	0.593041	ENSG00000140983.13	0.539217	ENSG00000005513.9	0.328726	ENSG00000103227.18	0.353411	ENSG00000206172.8	0.755144	TRUE	TRUE	TRUE	FALSE	FALSE	TRUE
Colon	Stromal cell	cg01075459	chr16:12572524:C:T	ENSG00000184602.5	0.496598	ENSG00000189067.12	0.448794	ENSG00000262420.3	0.235221	ENSG00000184602.5	0.0894295	ENSG00000048471.13	0.667719	TRUE	FALSE	FALSE	FALSE	FALSE	TRUE
Colon	Stromal cell	cg04547000	chr16:18949732:G:T	ENSG00000103544.14	0.117279	ENSG00000103550.13	0.314903	ENSG00000134419.15	0.754471	ENSG00000157106.16	0.712291	ENSG00000185164.14	0.101112	TRUE	FALSE	FALSE	TRUE	TRUE	FALSE
Colon	Stromal cell	cg01566384	chr16:49494948:TGCCTGTGCTATATTTA:T	ENSG00000260381.2	0.138837	ENSG00000279356.1	0.789357	ENSG00000205423.11	0.168951	ENSG00000102921.7	0.31325	ENSG00000121274.12	0.208297	TRUE	FALSE	TRUE	FALSE	FALSE	FALSE
Colon	Stromal cell	cg09381666	chr16:88691431:C:T	ENSG00000174177.12	0.214867	ENSG00000167508.11	0.266987	ENSG00000261546.1	0.320161	ENSG00000103335.21	0.295869	ENSG00000174177.12	0.87084	TRUE	FALSE	FALSE	FALSE	FALSE	TRUE
Colon	Stromal cell	cg03255749	chr17:836127:G:A	ENSG00000167711.13	0.493435	ENSG00000132376.19	0.202897	ENSG00000167699.13	0.324884	ENSG00000280279.1	0.509129	ENSG00000159842.14	0.964805	TRUE	FALSE	FALSE	FALSE	TRUE	TRUE
Colon	Stromal cell	cg09639964	chr17:1005655:AAG:A	ENSG00000262434.1	0.587639	ENSG00000177370.4	0.441239	ENSG00000262905.1	0.286365	ENSG00000262061.5	0.641962	ENSG00000171861.10	0.188373	TRUE	TRUE	FALSE	FALSE	TRUE	FALSE
Colon	Stromal cell	cg16096942	chr17:1019470:TCTGCTGCAGGTGTGGCCCTGGTGC:T	ENSG00000262434.1	0.513035	ENSG00000167716.18	0.126867	ENSG00000186532.11	0.165906	ENSG00000167193.7	0.342599	ENSG00000272636.3	0.126283	TRUE	TRUE	FALSE	FALSE	FALSE	FALSE
Colon	Stromal cell	cg09128350	chr17:1762803:A:G	ENSG00000167721.10	0.291169	ENSG00000236618.2	0.977289	ENSG00000185924.6	0.22045	ENSG00000132386.10	0.892741	ENSG00000186532.11	0.781	TRUE	FALSE	TRUE	FALSE	TRUE	TRUE
Colon	Stromal cell	cg22235600	chr17:2358383:A:G	ENSG00000132386.10	0.188073	ENSG00000167705.11	0.5677	ENSG00000007168.12	0.174258	ENSG00000262777.1	0.429928	ENSG00000132359.14	0.25307	TRUE	FALSE	TRUE	FALSE	FALSE	FALSE
Colon	Stromal cell	cg13633262	chr17:3557863:C:T	ENSG00000167723.14	0.999946	ENSG00000167723.14	0.989057	ENSG00000074370.17	0.198806	ENSG00000167723.14	0.961537	ENSG00000239884.3	0.123551	TRUE	TRUE	TRUE	FALSE	TRUE	FALSE
Colon	Stromal cell	cg15686419	chr17:19668605:GCTTTCCCTAT:G	ENSG00000072210.18	0.438156	ENSG00000072210.18	0.942175	ENSG00000072210.18	0.88761	ENSG00000166484.19	0.636756	ENSG00000142494.13	0.580058	TRUE	FALSE	TRUE	TRUE	TRUE	TRUE
Colon	Stromal cell	cg21839984	chr17:32519606:C:G	ENSG00000176749.8	0.781216	ENSG00000176749.8	0.97352	ENSG00000010244.18	0.36788	ENSG00000266777.1	0.310743	ENSG00000176749.8	0.998987	TRUE	TRUE	TRUE	FALSE	FALSE	TRUE
Colon	Stromal cell	cg14806529	chr17:35256683:C:T	ENSG00000266947.1	0.983903	ENSG00000276409.4	0.586447	ENSG00000172716.16	0.257386	ENSG00000275302.1	0.442504	ENSG00000271447.5	0.13331	TRUE	TRUE	TRUE	FALSE	FALSE	FALSE
Colon	Stromal cell	cg14832023	chr17:43777129:T:C	ENSG00000236383.8	0.800522	ENSG00000131471.6	0.623163	ENSG00000126581.12	0.344107	ENSG00000267080.5	0.14577	ENSG00000108861.8	0.984066	TRUE	TRUE	TRUE	FALSE	FALSE	TRUE
Colon	Stromal cell	cg23165643	chr17:45111523:C:G	ENSG00000181513.14	0.892784	ENSG00000180329.13	0.290585	ENSG00000186834.3	0.22135	ENSG00000181513.14	0.469563	ENSG00000168591.15	0.371791	TRUE	TRUE	FALSE	FALSE	FALSE	FALSE
Colon	Stromal cell	cg17911788	chr17:46266564:A:G	ENSG00000172992.11	0.698683	ENSG00000232300.1	0.539327	ENSG00000262500.1	0.774363	ENSG00000136448.11	0.770463	ENSG00000214425.7	0.522399	TRUE	TRUE	TRUE	TRUE	TRUE	TRUE
Colon	Stromal cell	cg05159804	chr17:46055704:A:T	ENSG00000263503.1	0.55776	ENSG00000238083.7	0.356453	ENSG00000262500.1	0.598996	ENSG00000263142.5	0.441601	ENSG00000204650.14	0.345484	TRUE	TRUE	FALSE	TRUE	FALSE	FALSE
Colon	Stromal cell	cg03437883	chr17:63881309:G:T	ENSG00000007312.12	0.886439	ENSG00000263883.1	0.711829	ENSG00000198909.7	0.601387	ENSG00000279369.1	0.791514	ENSG00000263883.1	0.793827	TRUE	TRUE	TRUE	TRUE	TRUE	TRUE
Colon	Stromal cell	cg03316658	chr17:81336836:A:G	ENSG00000262223.6	0.427169	ENSG00000185168.5	0.964023	ENSG00000225663.7	0.314312	ENSG00000185332.6	0.979678	ENSG00000185168.5	0.456129	TRUE	FALSE	TRUE	FALSE	TRUE	FALSE
Colon	Stromal cell	cg23522485	chr17:82124184:A:G	ENSG00000264548.1	0.360779	ENSG00000169710.8	0.679507	ENSG00000186765.11	0.298451	ENSG00000265458.1	0.341657	ENSG00000176155.18	0.664973	TRUE	FALSE	TRUE	FALSE	FALSE	TRUE
Colon	Stromal cell	cg21909206	chr17:82635982:G:A	ENSG00000141580.15	0.980647	ENSG00000141580.15	0.89482	ENSG00000141580.15	0.78936	ENSG00000141580.15	0.991324	ENSG00000141580.15	0.993379	TRUE	TRUE	TRUE	TRUE	TRUE	TRUE
Colon	Stromal cell	cg07082130	chr18:23331390:G:GC	ENSG00000265750.1	0.270756	ENSG00000134490.13	0.579002	ENSG00000154065.16	0.302071	ENSG00000134490.13	0.839099	ENSG00000273348.1	0.78468	TRUE	FALSE	TRUE	FALSE	TRUE	TRUE
Colon	Stromal cell	cg15682262	chr18:74482908:A:G	ENSG00000187773.8	0.953065	ENSG00000133313.14	0.980664	ENSG00000180011.6	0.599773	ENSG00000187773.8	0.987786	ENSG00000180011.6	0.0774891	TRUE	TRUE	TRUE	TRUE	TRUE	FALSE
Colon	Stromal cell	cg21786191	chr18:75198732:T:C	ENSG00000180011.6	0.834681	ENSG00000179981.9	0.661533	ENSG00000215421.9	0.125017	ENSG00000180011.6	0.130163	ENSG00000180011.6	0.997372	TRUE	TRUE	TRUE	FALSE	FALSE	TRUE
Colon	Stromal cell	cg04547181	chr19:6722011:G:T	ENSG00000125730.16	0.863476	ENSG00000125730.16	0.762575	ENSG00000269680.1	0.152937	ENSG00000267299.1	0.353188	ENSG00000125734.15	0.970996	TRUE	TRUE	TRUE	FALSE	FALSE	TRUE
Colon	Stromal cell	cg12768975	chr19:6722011:G:T	ENSG00000125730.16	0.863459	ENSG00000125730.16	0.762607	ENSG00000269680.1	0.152923	ENSG00000267299.1	0.353191	ENSG00000125734.15	0.971128	TRUE	TRUE	TRUE	FALSE	FALSE	TRUE
Colon	Stromal cell	cg02997983	chr19:21570233:C:G	ENSG00000197013.9	0.97861	ENSG00000268555.1	0.978643	ENSG00000268433.1	0.944181	ENSG00000268433.1	0.97792	ENSG00000268555.1	0.978643	TRUE	TRUE	TRUE	TRUE	TRUE	TRUE
Colon	Stromal cell	cg02757488	chr19:40687675:A:G	ENSG00000007129.17	0.673755	ENSG00000269069.1	0.697377	ENSG00000105227.14	0.302775	ENSG00000269800.1	0.618519	ENSG00000268355.1	0.373034	TRUE	TRUE	TRUE	FALSE	TRUE	FALSE
Colon	Stromal cell	cg00028993	chr19:47755569:G:A	ENSG00000105373.18	0.948433	ENSG00000105373.18	0.852701	ENSG00000105373.18	0.347087	ENSG00000176909.11	0.178029	ENSG00000105373.18	0.622346	TRUE	TRUE	TRUE	FALSE	FALSE	TRUE
Colon	Stromal cell	cg06649663	chr19:56093663:G:C	ENSG00000142409.5	0.572095	ENSG00000197483.9	0.361896	ENSG00000125503.12	0.246293	ENSG00000166770.10	0.753645	ENSG00000180089.5	0.31035	TRUE	TRUE	FALSE	FALSE	TRUE	FALSE
Colon	Stromal cell	cg20956548	chr19:56093663:G:C	ENSG00000142409.5	0.571137	ENSG00000197483.9	0.361918	ENSG00000125503.12	0.246293	ENSG00000166770.10	0.753649	ENSG00000180089.5	0.309708	TRUE	TRUE	FALSE	FALSE	TRUE	FALSE
Colon	Stromal cell	cg17843510	chr20:35159911:T:C	ENSG00000100991.11	0.88982	ENSG00000078747.14	0.180251	ENSG00000088298.12	0.941651	ENSG00000230155.6	0.34521	ENSG00000088298.12	0.964737	TRUE	TRUE	FALSE	TRUE	FALSE	TRUE
Colon	Stromal cell	cg16097074	chr20:35956725:T:C	ENSG00000088298.12	0.667661	ENSG00000171222.10	0.795215	ENSG00000061656.9	0.864089	ENSG00000088340.15	0.912627	ENSG00000101019.21	0.721583	TRUE	TRUE	TRUE	TRUE	TRUE	TRUE
Colon	Stromal cell	cg22625504	chr20:37981113:T:C	ENSG00000196756.11	0.244932	ENSG00000132821.11	0.994211	ENSG00000101407.12	0.754284	ENSG00000101407.12	0.653842	ENSG00000101407.12	0.475604	TRUE	FALSE	TRUE	TRUE	TRUE	FALSE
Colon	Stromal cell	cg04940435	chr20:45783928:C:A	ENSG00000124116.18	0.987352	ENSG00000124116.18	0.986138	ENSG00000124116.18	0.981048	ENSG00000124116.18	0.98734	ENSG00000124116.18	0.981127	TRUE	TRUE	TRUE	TRUE	TRUE	TRUE
Colon	Stromal cell	cg09766721	chr20:46608476:A:C	ENSG00000271984.1	0.379818	ENSG00000124116.18	0.932053	ENSG00000101473.16	0.338213	ENSG00000100985.7	0.441944	ENSG00000101457.12	0.639566	TRUE	FALSE	TRUE	FALSE	FALSE	TRUE
Colon	Stromal cell	cg24475058	chr20:62432366:A:G	ENSG00000226094.1	0.211629	ENSG00000101189.6	0.184088	ENSG00000130706.12	0.0997621	ENSG00000101194.17	0.680004	ENSG00000167046.4	0.764482	TRUE	FALSE	FALSE	FALSE	TRUE	TRUE
Colon	Stromal cell	cg00957609	chr21:33042994:C:T	ENSG00000279690.1	0.238173	ENSG00000205927.4	0.823256	ENSG00000242220.6	0.511105	ENSG00000159140.19	0.369567	ENSG00000177692.11	0.176582	TRUE	FALSE	TRUE	TRUE	FALSE	FALSE
Colon	Stromal cell	cg25745742	chr21:33278948:T:C	ENSG00000237945.7	0.351343	ENSG00000159110.19	0.81107	ENSG00000159110.19	0.337516	ENSG00000241837.6	0.255845	ENSG00000159086.14	0.0945425	TRUE	FALSE	TRUE	FALSE	FALSE	FALSE
Colon	Stromal cell	cg01329690	chr21:37129712:G:C	ENSG00000228677.1	0.418557	ENSG00000242553.1	0.320981	ENSG00000185808.13	0.746979	ENSG00000230366.9	0.699627	ENSG00000157538.13	0.351703	TRUE	FALSE	FALSE	TRUE	TRUE	FALSE
Colon	Stromal cell	cg02484746	chr21:42584143:T:C	ENSG00000160201.11	0.196257	ENSG00000225431.1	0.61795	ENSG00000160193.11	0.159959	ENSG00000225431.1	0.220393	ENSG00000173276.13	0.144188	TRUE	FALSE	TRUE	FALSE	FALSE	FALSE
Colon	Stromal cell	cg17347063	chr22:35646939:C:T	ENSG00000221963.5	0.996009	ENSG00000221963.5	0.733518	ENSG00000221963.5	0.999999	ENSG00000221963.5	0.779184	ENSG00000100345.20	0.0755739	TRUE	TRUE	TRUE	TRUE	TRUE	FALSE
Colon	Stromal cell	cg14301048	chr22:35646939:C:T	ENSG00000221963.5	0.996009	ENSG00000221963.5	0.733517	ENSG00000221963.5	0.999999	ENSG00000221963.5	0.779183	ENSG00000100345.20	0.0755736	TRUE	TRUE	TRUE	TRUE	TRUE	FALSE
Lung	Endothelial cell	cg21480333	chr1:201628819:T:C	ENSG00000116852.14	0.233343	ENSG00000077157.21	0.264189	ENSG00000232237.3	0.195692	ENSG00000081277.12	0.363195	ENSG00000163362.10	0.555849	TRUE	FALSE	FALSE	FALSE	FALSE	TRUE
Lung	Endothelial cell	cg03724874	chr3:112000483:C:T	ENSG00000244720.1	0.190632	ENSG00000144834.13	0.835227	ENSG00000163607.15	0.185887	ENSG00000114529.12	0.245765	ENSG00000244720.1	0.20414	TRUE	FALSE	TRUE	FALSE	FALSE	FALSE
Lung	Endothelial cell	cg16449649	chr3:158603134:T:C	ENSG00000178053.17	0.987326	ENSG00000178053.17	0.198361	ENSG00000174891.12	0.298617	ENSG00000118849.9	0.389235	ENSG00000178053.17	0.0335243	TRUE	TRUE	FALSE	FALSE	FALSE	FALSE
Lung	Endothelial cell	cg01879420	chr6:110873500:C:G	ENSG00000155111.14	0.371584	ENSG00000155111.14	0.920759	ENSG00000197498.12	0.737329	ENSG00000255389.1	0.207326	ENSG00000213149.3	0.548162	TRUE	FALSE	TRUE	TRUE	FALSE	TRUE
Lung	Endothelial cell	cg02889774	chr8:21945399:A:T	ENSG00000120913.23	0.570862	ENSG00000130227.16	0.745523	ENSG00000158815.10	0.608603	ENSG00000179388.8	0.181606	ENSG00000158806.13	0.838853	TRUE	TRUE	TRUE	TRUE	FALSE	TRUE
Lung	Endothelial cell	cg04676645	chr8:27607412:A:G	ENSG00000279302.3	0.17294	ENSG00000120885.21	0.891894	ENSG00000253875.1	0.112529	ENSG00000120907.17	0.361784	ENSG00000168078.9	0.038513	TRUE	FALSE	TRUE	FALSE	FALSE	FALSE
Lung	Endothelial cell	cg03177551	chr15:41554978:T:G	ENSG00000137802.13	0.486484	ENSG00000062524.15	0.999994	ENSG00000103932.11	0.988367	ENSG00000137802.13	0.931047	ENSG00000092445.11	0.400935	TRUE	FALSE	TRUE	TRUE	TRUE	FALSE
Lung	Endothelial cell	cg26562921	chr16:84714360:G:T	ENSG00000103194.15	0.830796	ENSG00000260228.5	0.223001	ENSG00000179219.5	0.281699	ENSG00000278716.1	0.134688	ENSG00000263968.2	0.315169	TRUE	TRUE	FALSE	FALSE	FALSE	FALSE
Lung	Endothelial cell	cg09113939	chr16:89608660:T:G	ENSG00000275734.1	0.785651	ENSG00000185669.5	0.204952	ENSG00000158792.15	0.400853	ENSG00000275734.1	0.728082	ENSG00000260528.4	0.731964	TRUE	TRUE	FALSE	FALSE	TRUE	TRUE
Lung	Endothelial cell	cg06671298	chr17:81459390:A:G	ENSG00000169738.7	0.332228	ENSG00000280407.2	0.420313	ENSG00000280407.2	0.230092	ENSG00000185332.6	0.563792	ENSG00000262049.1	0.421373	TRUE	FALSE	FALSE	FALSE	TRUE	FALSE
Lung	Endothelial cell	cg21841085	chr17:81459390:A:G	ENSG00000181409.11	0.303007	ENSG00000280407.2	0.398866	ENSG00000280407.2	0.248537	ENSG00000185332.6	0.560373	ENSG00000262049.1	0.407597	TRUE	FALSE	FALSE	FALSE	TRUE	FALSE
Lung	Endothelial cell	cg15007983	chr19:18591687:T:C	ENSG00000006016.10	0.863747	ENSG00000006016.10	0.992619	ENSG00000007080.10	0.377075	ENSG00000268030.1	0.684648	ENSG00000006015.17	0.595537	TRUE	TRUE	TRUE	FALSE	TRUE	TRUE
Lung	Endothelial cell	cg01349478	chr19:35309759:G:T	ENSG00000105695.14	1	ENSG00000105695.14	1	ENSG00000269553.1	0.865617	ENSG00000105695.14	1	ENSG00000105695.14	0.999638	TRUE	TRUE	TRUE	TRUE	TRUE	TRUE
Lung	Epithelial cell	cg05329510	chr1:1229369:G:GC	ENSG00000176022.4	0.798343	ENSG00000176022.4	0.779598	ENSG00000176022.4	0.791224	ENSG00000221978.11	0.784594	ENSG00000078808.16	0.990373	TRUE	TRUE	TRUE	TRUE	TRUE	TRUE
Lung	Epithelial cell	cg12763828	chr1:9272201:T:C	ENSG00000162426.14	0.388756	ENSG00000281937.1	0.175789	ENSG00000049239.12	0.841272	ENSG00000188807.12	0.200479	ENSG00000171608.15	0.420315	TRUE	FALSE	FALSE	TRUE	FALSE	FALSE
Lung	Epithelial cell	cg05907464	chr1:9158662:T:G	ENSG00000178585.14	0.186064	ENSG00000228526.6	0.296776	ENSG00000142599.17	0.807371	ENSG00000280113.2	0.098386	ENSG00000130939.18	0.382597	TRUE	FALSE	FALSE	TRUE	FALSE	FALSE
Lung	Epithelial cell	cg02487331	chr1:147030175:A:G	ENSG00000277406.1	0.224128	ENSG00000180867.10	0.116389	ENSG00000131781.12	0.124039	ENSG00000131791.7	0.154679	ENSG00000227242.4	0.896721	TRUE	FALSE	FALSE	FALSE	FALSE	TRUE
Lung	Epithelial cell	cg13983884	chr1:154744782:T:C	ENSG00000163357.10	0.349175	ENSG00000163357.10	0.332367	ENSG00000143570.17	0.358318	ENSG00000270361.1	0.578125	ENSG00000116539.12	0.197237	TRUE	FALSE	FALSE	FALSE	TRUE	FALSE
Lung	Epithelial cell	cg19522960	chr2:42060166:G:A	ENSG00000162882.14	0.195926	ENSG00000115944.14	0.559417	ENSG00000236090.2	0.0974501	ENSG00000162878.12	0.412403	ENSG00000162881.6	0.12302	TRUE	FALSE	TRUE	FALSE	FALSE	FALSE
Lung	Epithelial cell	cg13088038	chr2:113164835:A:G	ENSG00000279267.1	0.132483	ENSG00000136689.18	0.244232	ENSG00000125538.11	0.54645	ENSG00000237753.1	0.516267	ENSG00000169629.11	0.0991521	TRUE	FALSE	FALSE	TRUE	TRUE	FALSE
Lung	Epithelial cell	cg17764313	chr3:127618091:A:G	ENSG00000282860.1	0.423625	ENSG00000282860.1	0.985105	ENSG00000163870.14	0.967494	ENSG00000163870.14	0.519099	ENSG00000073111.13	0.420868	TRUE	FALSE	TRUE	TRUE	TRUE	FALSE
Lung	Epithelial cell	cg05104523	chr4:3297777:T:C	ENSG00000159788.18	0.966535	ENSG00000188981.10	0.887444	ENSG00000159788.18	0.219265	ENSG00000125388.19	0.325767	ENSG00000159788.18	0.980552	TRUE	TRUE	TRUE	FALSE	FALSE	TRUE
Lung	Epithelial cell	cg26888012	chr6:31123081:G:A	ENSG00000250535.1	0.475722	ENSG00000168477.17	0.321896	ENSG00000228415.3	0.355391	ENSG00000204516.9	0.206738	ENSG00000213780.10	0.826391	TRUE	FALSE	FALSE	FALSE	FALSE	TRUE
Lung	Epithelial cell	cg11956498	chr7:30764200:G:C	ENSG00000241644.2	0.549639	ENSG00000229263.1	0.448328	ENSG00000229263.1	0.12748	ENSG00000241644.2	0.289263	ENSG00000180233.10	0.401367	TRUE	TRUE	FALSE	FALSE	FALSE	FALSE
Lung	Epithelial cell	cg00191853	chr8:100165529:C:A	ENSG00000104450.12	0.497649	ENSG00000104450.12	0.852182	ENSG00000156509.13	0.853009	ENSG00000156509.13	0.564112	ENSG00000104450.12	0.987853	TRUE	FALSE	TRUE	TRUE	TRUE	TRUE
Lung	Epithelial cell	cg19097407	chr9:36154681:A:C	ENSG00000122694.15	0.419232	ENSG00000122694.15	0.961868	ENSG00000122694.15	0.314602	ENSG00000213866.3	0.32629	ENSG00000107185.9	0.637019	TRUE	FALSE	TRUE	FALSE	FALSE	TRUE
Lung	Epithelial cell	cg13861904	chr9:136533458:C:T	ENSG00000237886.1	0.977759	ENSG00000180549.7	0.482315	ENSG00000237886.1	0.94557	ENSG00000237886.1	0.861883	ENSG00000196642.18	0.340223	TRUE	TRUE	FALSE	TRUE	TRUE	FALSE
Lung	Epithelial cell	cg24984350	chr10:3125914:G:A	ENSG00000067082.14	0.077549	ENSG00000273001.1	0.176444	ENSG00000273001.1	0.0728918	ENSG00000237399.7	0.952734	ENSG00000237399.7	0.0608292	TRUE	FALSE	FALSE	FALSE	TRUE	FALSE
Lung	Epithelial cell	cg01727419	chr10:103883045:A:C	ENSG00000226431.1	0.313129	ENSG00000148835.10	0.233127	ENSG00000260461.1	0.266914	ENSG00000148795.6	0.196423	ENSG00000107957.16	0.977108	TRUE	FALSE	FALSE	FALSE	FALSE	TRUE
Lung	Epithelial cell	cg08771084	chr10:110433979:C:G	ENSG00000203497.2	0.745293	ENSG00000150594.6	0.112293	ENSG00000108061.11	0.121193	ENSG00000150594.6	0.220585	ENSG00000203497.2	0.313404	TRUE	TRUE	FALSE	FALSE	FALSE	FALSE
Lung	Epithelial cell	cg08687829	chr10:113071675:A:T	ENSG00000165806.19	0.104212	ENSG00000232934.7	0.543821	ENSG00000232934.7	0.205678	ENSG00000196865.4	0.337825	ENSG00000196865.4	0.066601	TRUE	FALSE	TRUE	FALSE	FALSE	FALSE
Lung	Epithelial cell	cg19174603	chr10:122102021:A:C	ENSG00000196177.12	0.13953	ENSG00000066468.22	0.104999	ENSG00000138162.18	0.0757069	ENSG00000066468.22	0.168848	ENSG00000138161.13	0.599541	TRUE	FALSE	FALSE	FALSE	FALSE	TRUE
Lung	Epithelial cell	cg01052776	chr11:492617:G:A	ENSG00000174915.11	0.848536	ENSG00000174915.11	0.933479	ENSG00000174915.11	0.697845	ENSG00000174915.11	0.889435	ENSG00000174775.16	0.914453	TRUE	TRUE	TRUE	TRUE	TRUE	TRUE
Lung	Epithelial cell	cg16098618	chr11:76657509:A:G	ENSG00000254810.1	0.314709	ENSG00000254810.1	0.968828	ENSG00000178795.9	0.214212	ENSG00000254810.1	0.709124	ENSG00000255363.2	0.194714	TRUE	FALSE	TRUE	FALSE	TRUE	FALSE
Lung	Epithelial cell	cg05887493	chr11:112182006:GA:G	ENSG00000150783.9	0.225457	ENSG00000150782.11	0.967226	ENSG00000230911.1	0.178796	ENSG00000150782.11	0.713083	ENSG00000137720.7	0.224855	TRUE	FALSE	TRUE	FALSE	TRUE	FALSE
Lung	Epithelial cell	cg05534515	chr12:664290:C:T	ENSG00000171840.11	0.606788	ENSG00000256540.1	0.136005	ENSG00000171840.11	0.263872	ENSG00000226210.3	0.126401	ENSG00000256948.1	0.14367	TRUE	TRUE	FALSE	FALSE	FALSE	FALSE
Lung	Epithelial cell	cg20356637	chr15:67058143:C:T	ENSG00000174446.12	0.136069	ENSG00000259347.6	0.640827	ENSG00000260773.1	0.137951	ENSG00000259347.6	0.144947	ENSG00000188779.10	0.230228	TRUE	FALSE	TRUE	FALSE	FALSE	FALSE
Lung	Epithelial cell	cg01592554	chr17:5379468:C:T	ENSG00000108559.11	0.894366	ENSG00000263220.1	0.737284	ENSG00000263164.1	0.632438	ENSG00000263272.1	0.487774	ENSG00000108509.20	0.836639	TRUE	TRUE	TRUE	TRUE	FALSE	TRUE
[truncated: 1,763 more rows]

## Sheet: Supplementary Table 10
Supplementary Table 10. Characteristics of the 90 GWAS studies utilized in colocalization analyses.
[truncated: 91 more rows]

[truncated: 1 more sheets: Supplementary Table 11]
